# Supplementary material for: Prenatal Expression Patterns of Genes Associated With Neuropsychiatric Disorders
Source: Atypon-hosted journal article supplement (doi:10.1176/appi.ajp.2014.13111452), 2014-05-30
Supplement: 758_ds001.pdf [file 758_ds001.pdf]

## SUPPLEMENTARY METHODS

### *Gene Set Assignment*

Based on literature review, susceptibility genes were classified into groupings of 6 neuropsychiatric disorders and 12 gene sets based on genetic evidence for each disorder

- (1) **Syndromal Neurodevelopmental Disorders:** As reported by Talkowski et al, 2012 (1) in a cohort of 38 patients who presented with syndromal neurodevelopmental disorders of varying phenotypic type and severity, 33 potentially causal genes were identified to be disrupted in balanced chromosomal abnormalities by karyotypic analysis and sequencing of target breakpoints. **Of the 33 identified genes, microarray probes in the Brain Cloud data set mapped to 31 genes.**
- (2) **Schizophrenia: Genes associated with Schizophrenia by meta-analysis:** The “Top Results” genes as reported in the Schizophrenia Research Forum meta-analysis as of October 2013 (<http://www.szgene.org/>) were identified (2). For genes with identical HuGENet/Venice grades, ranking is based on p value; for genes with identical grade and p value, ranking is based on effect size (odds ratio). **Of the 40 identified genes for schizophrenia, microarray probes in the Brain Cloud data set mapped to 36 genes.**
- (3) **Schizophrenia: Genes associated with Schizophrenia by GWAS:** As reported by the Psychiatric Genomics Consortium (PGC), by Ripke et al 2013 (3), in a multistage genome-wide association study for schizophrenia, 22 loci associated at genome-wide significance ( $p < 10^{-8}$ ) were reported. The reported genes containing the associated SNP or reported to be in LD region with the associated SNP were selected. Also, as reported by the Psychiatric Genomics Consortium (PGC), by Ripke et al, 2011 (4), in a genome-wide association study with stage 1 discovery sample of 21,856 individuals of European ancestry and a stage 2 replication sample of 29,839 independent subjects, highly significant genic regions with one or more SNPs achieving a Stage 1  $p < 10^{-6}$  and/or a Combined Stages 1&2  $p < 10^{-6}$  were reported. The reported genes containing the associated SNP or in the LD region of the associated SNP (defined as  $r^2$  of 0.6 or greater, based on HapMap3) within 6MB of the associated SNP were selected. The MHC region on chromosome 6

was excluded from the present analysis due to strong LD within this region. **Of the 132 identified genes, microarray probes in the Brain Cloud data set mapped to 106 genes.**

(4) **Schizophrenia: Genes in CNV regions associated with schizophrenia:** We identified recurrent CNVs associated with schizophrenia from a series of genome-wide association studies from 2008 until the present (5–12). Each of the studies met the following criteria: standardized diagnosis, genome-wide detection, confirmed structural variations using at least two different methods for discovery and validation, and sufficient information to permit the identification of duplicate samples. Each identified CNV was rare (<1% frequency in the total sample) and autosomal, and met the study’s proposed criteria for “high confidence”. Recurrence was defined as identification in multiple cases across studies. CNVs regardless of size were included, 10–100kb, and >100kb. The following regions were identified: 1q21.1, 2p16.3, 3q29, 7q36.3, 15q11.2, 15q13.3, 16p11.2, and 22q11.21. Genomic regions that were initially reported using NCBI build 36 (hg18) coordinates were updated with RefSeq genes that populated to hg19 coordinates, if the region was better characterized in the latter version. **Of the 154 identified genes, microarray probes in the Brain Cloud data set mapped to 113 genes.**

(5) **Schizophrenia: Rare de novo Single nucleotide variants (SNVs)/Indels associated with schizophrenia:** From a series of exome capture high throughput sequencing studies of trios and/or quads, rare de novo mutations in probands with schizophrenia were identified, including missense, nonsense, frameshift and splice site mutations, as well as INDELS. The putative mutations in each study were validated by direct PCR amplification or Sanger sequencing within each study. The genes affected by the de novo mutations in the patient samples were selected. **Of the 240 identified genes, microarray probes in the Brain Cloud data set mapped to 212 genes (13–16).**

(6) **ASD: Genes in CNV regions associated with ASD:** We identified recurrent CNVs associated with ASD from a series of genome-wide association studies from 2007 until the present, as summarized by Sanders et al. (17–22) Each of these studies met the following criteria: standardized diagnosis, genome-wide detection, confirmed structural variations, and sufficient information to permit the identification of duplicate samples. Each identified CNV was rare (<1% frequency in the total sample) and autosomal, and met the study’s proposed criteria for “high confidence”. Recurrence was defined as identification in multiple cases across studies. CNVs regardless of size were included, 10–100kb, and >100kb. The

following regions were identified: 1q21.1, 2p16.3, 3p14.1, 5p15.2, 7q11.23, 7q31.1, 7q36.2, 8p23.3, 9p24.3, 10q11.23–21.1, 12q24.31, 15q11.2–13.1, 15q13.2–13.3, 15q23–24.1, 16p11.2, 16q23.3, 18q22.1, 20q13.33, 22q11.21, 22q13.33. **Of the 216 identified genes, microarray probes in the Brain Cloud data set mapped to 176 genes.**

(7) **Genes associated with ASD:** Genes associated with ASD were selected from a publicly available online database, SFARIgene, compiled by the Simons Foundation Autism Research Initiative, and most recently updated in June 2013 (<http://sfari.org/resources/sfari-gene>) (23). Genes labeled and cataloged in SFARIgene by “genetic association” and “functional” were included; that is, risk-conferring candidate genes with common polymorphisms identified from genetic association studies, and functional candidates relevant for ASD biology were included. The category of “rare single gene variant” was also included but only if did not contain genes analyzed in the CNV analysis above. The “syndromic” category of SFARIgene was excluded from current analysis due to the phenotypic heterogeneity of syndromic forms of autism. **Of the 262 identified genes, microarray probes in the Brain Cloud data set mapped to 242 genes.**

(8) **BPAD: Genes associated with Bipolar Disorder by GWAS:** As reported by the PGC meta-analysis, by Sklar et al, 2011 (24), in a genome-wide association study with stage 1 discovery sample of 7,481 individuals with BPAD and a stage 2 replication sample of 4,496 independent subjects with BPAD, highly significant genic regions with one or more SNPs achieving a Stage 1  $p < 5 \times 10^{-5}$  and/or a Combined Stages 1&2  $p < 5 \times 10^{-5}$  were included. Genes containing the associated SNP or genes in the LD region of the associated SNP within 20kb as reported by Sklar et al, 2011 were included. In addition, as reported in the large-scale BPAD association studies by Baum et al, 2008 (25), Cichon et al, 2011 (26), and Chen et al, 2013 (27), genes containing an associated SNP or in the LD region of an associated SNP, with a Phase I  $p < 10^{-8}$ , or combined Phase I and II  $p < 10^{-8}$ , that is GWAS significant, but not reported in the PGC 2011 meta-analysis, were included. **Of the 146 identified genes, microarray probes in the Brain Cloud data set mapped to 123 genes.**

(9) **Genes associated with Intellectual Disability:** Genes from a standardized clinical diagnostic genetic testing panel for intellectual disability were chosen, including 33 autosomal genes and 61 X-linked genes

(The University of Chicago Genetic Services Laboratories, Comprehensive Non-Syndromic Intellectual Disability Panel) (28). **Of the 94 identified genes, microarray probes in the Brain Cloud data set mapped to 88 genes.**

(10) **Genes Associated with Neurodegenerative Disorders:** The following neurodegenerative diseases were included: Alzheimer's Disease, Parkinson's Disease, Fronto-temporal Dementia, Amyotrophic Lateral Sclerosis, Huntington's Disease, and Multiple Sclerosis. For each disease, established Mendelian genes were included as well as genes from the "Top Results" list for each disease from a systematic meta-analysis of genome-wide association studies, reported as of October 2013 ([www.alzgene.org](http://www.alzgene.org) (29), [www.pdgene.org](http://www.pdgene.org) (30), [www.msgene.org](http://www.msgene.org) (31)). **Of the 59 identified genes, microarray probes in the Brain Cloud data set mapped to 46 genes.**

(11) **Genes that Overlap Diagnostic Categories:** A gene that was identified in more than 1 disease/diagnostic category in the current analysis was included. Genes that overlap the categories of NDD and ASD in the current analysis were not included in the Overlap category, since the NDD category was syndromal, containing some cases of patients with autism features. **A total of 62 genes overlapped multiple diagnostic categories and microarray probes in the Brain Cloud data set mapped to all 62 genes.**

(12) **CNVs that Overlap Diagnostic Categories (SCZ and ASD):** A gene that was identified to be affected by a recurrent CNV in ASD and SCZ was included. A total of 73 genes overlapped SCZ/ASD CNV regions in: 1q21.1, 2p16.3, 15q13.3, 16p11.2, and 22q11.21 and microarray probes in the Brain Cloud data set mapped to all 73 genes.

### ***Supplementary Statistical Methods***

The surrogate variables were estimated with the RUV-2 ("Remove Unwanted Variation 2-step") algorithm (32) which requires a set of "negative control" genes that are associated with the unwanted variation but not the biological variable on interest (e.g. the fetal effect). This adaptation of surrogate variable analysis (SVA), allowed for the decomposition of biological (fetal) and technical (genes associated with RNA quality) effects, as fetal samples tended to have higher RNA integrity numbers (RINs). We used 374 probes associated with RIN (acting as a

surrogate for unwanted biological variability) and unassociated with age, and used diagnostic plots from the algorithm to identify 30 surrogate variables.

Statistics from multiple probes mapping to the same gene by symbol were reduced into a single statistic. We did not include the 1,621 probes that were not annotated to a gene symbol in the present analysis. If a gene had expressed transcripts that annotated to more than one probe, the probe yielding the largest positive fetal effect was reported; if a gene had expressed transcripts that annotated to probes yielding only negative fetal effects (e.g. more expressed in postnatal samples), the most negative fetal effect was reported.

To investigate cellular and molecular functionality during prenatal neurodevelopment, prenatally enriched genes were subject to gene set enrichment analysis using the GOstats R package (33) for the hypergeometric test, and the limma R package for the Wilcoxon test (34). The genes that were preferentially fetally expressed within a disease-associated gene group were further subject to qualitative protein-protein interaction analysis using the IPA Ingenuity database ([www.ingenuity.com](http://www.ingenuity.com)) (35).

Disclosures and Acknowledgments:

The authors have no conflicts of interest to report.

## SUPPLEMENTARY METHODS REFERENCES:

1. Talkowski ME, Rosenfeld JA, Blumenthal I, Pillalamarri V, Chiang C, Heilbut A, Ernst C, Hanscom C, Rossin E, Lindgren AM, Pereira S, Ruderfer D, Kirby A, Ripke S, Harris DJ, Lee JH, Ha K, Kim HG, Solomon BD, Gropman AL, Lucente D, Sims K, Ohsumi TK, Borowsky ML, Loranger S, Quade B, Lage K, Miles J, Wu BL, Shen Y, Neale B, Shaffer LG, Daly MJ, Morton CC, Gusella JF. Sequencing chromosomal abnormalities reveals neurodevelopmental loci that confer risk across diagnostic boundaries. *Cell*. 2012; 149(3):525-37
2. Allen NC, Bagade S, McQueen MB, Ioannidis JP, Kavvoura FK, Khoury MJ, Tanzi RE, Bertram L. Systematic Meta-Analyses and Field Synopsis of Genetic Association Studies in Schizophrenia: The SzGene Database. *Nat Genet*. 2008; 40(7): 827-34
3. Ripke S, O'Dushlaine C, Chambert K, Moran JL, Kähler AK, Akterin S, Bergen SE, Collins AL, Crowley JJ, Fromer M, Kim Y, Lee SH, Magnusson PK, Sanchez N, Stahl EA, Williams S, Wray NR, Xia K, Bettella F, Borglum AD, Bulik-Sullivan BK, Cormican P, Craddock N, de Leeuw C, Durmishi N, Gill M, Golimbet V, Hamshere ML, Holmans P, Hougaard DM, Kendler KS, Lin K, Morris DW, Mors O, Mortensen PB, Neale BM, O'Neill FA, Owen MJ, Milovancevic MP, Posthuma D, Powell J, Richards AL, Riley BP, Ruderfer D, Rujescu D, Sigurdsson E, Silagadze T, Smit AB, Stefansson H, Steinberg S, Suvisaari J, Tosato S, Verhage M, Walters JT; Multicenter Genetic Studies of Schizophrenia Consortium, Levinson DF, Gejman PV, Kendler KS, Laurent C, Mowry BJ, O'Donovan MC, Owen MJ, Pulver AE, Riley BP, Schwab SG, Wildenauer DB, Dudbridge F, Holmans P, Shi J, Albus M, Alexander M, Campion D, Cohen D, Dikeos D, Duan J, Eichhammer P, Godard S, Hansen M, Lerer FB, Liang KY, Maier W, Mallet J, Nertney DA, Nestadt G, Norton N, O'Neill FA, Papadimitriou GN, Ribble R, Sanders AR, Silverman JM, Walsh D, Williams NM, Wormley B; Psychosis Endophenotypes International Consortium, Arranz MJ, Bakker S, Bender S, Bramon E, Collier D, Crespo-Facorro B, Hall J, Iyegbe C, Jablensky A, Kahn RS, Kalaydjieva L, Lawrie S, Lewis CM, Lin K, Linszen DH, Mata I, McIntosh A, Murray RM, Ophoff RA, Powell J, Rujescu D, Van Os J, Walshe M, Weisbrod M, Wiersma D; Wellcome Trust Case Control Consortium 2; Management Committee; Donnelly P, Barroso I, Blackwell JM, Bramon E, Brown MA, Casas JP, Corvin AP, Deloukas P, Duncanson A, Jankowski J, Markus HS, Mathew CG, Palmer CN, Plomin R, Rautanen A, Sawcer SJ, Trembath RC, Viswanathan AC, Wood NW; Data and Analysis Group; Spencer CC, Band G, Bellenguez C, Freeman C, Hellenthal G, Giannoulidou E, Pirinen M, Pearson RD, Strange A, Su Z, Vukcevic D, Donnelly P; DNA, Genotyping, Data QC and Informatics Group; Langford C, Hunt SE, Edkins S, Gwilliam R, Blackburn H, Bumpstead SJ, Dronov S, Gillman M, Gray E, Hammond N, Jayakumar A, McCann OT, Liddle J, Potter SC, Ravindrarajah R, Ricketts M, Tashakkori-Ghanbaria A, Waller MJ, Weston P, Widaa S, Whittaker P, Barroso I, Deloukas P; Publications Committee; Mathew CG, Blackwell JM, Brown MA, Corvin AP, McCarthy MI, Spencer CC, Bramon E, Corvin AP, O'Donovan MC, Stefansson K, Scolnick E, Purcell S, McCarroll SA, Sklar P, Hultman CM, Sullivan PF. Genome-wide association analysis identifies 13 new risk loci for schizophrenia. *Nat Genet*. 2013; 45(10):1150-9
4. Ripke, S, Schizophrenia Psychiatric Genome-Wide Association Study (GWAS) Consortium. Genome-wide association study identifies five new schizophrenia loci. *Nat Genet*. 2011; 43(10):969-76
5. Xu B, Roos JL, Levy S, van Rensburg EJ, Gogos JA, Karayiorgou M. Strong association of de novo copy number mutations with sporadic schizophrenia. *Nat Genet*. 2008; 40(7):880-5
6. Walsh T, McClellan JM, McCarthy SE, Addington AM, Pierce SB, Cooper GM, Nord AS, Kusenda M, Malhotra D, Bhandari A, Stray SM, Rippey CF, Rocanova P, Makarov V, Lakshmi B, Findling RL, Sikich L, Stromberg T, Merriman B, Gogtay N, Butler P, Eckstrand K, Noory L, Gochman P, Long R, Chen Z, Davis S, Baker C, Eichler EE, Meltzer PS, Nelson SF, Singleton AB, Lee MK, Rapoport JL, King MC, Sebat J. Rare structural variants disrupt multiple genes in neurodevelopmental pathways in schizophrenia. *Science*. 2008; 320(5875):539-43
7. Stone JL, International Schizophrenia Consortium. Rare chromosomal deletions and duplications increase risk of schizophrenia. *Nature*. 2008; 455(7210):237-41
8. Stefansson H, Rujescu D, Cichon S, Pietiläinen OP, Ingason A, Steinberg S, Fossdal R, Sigurdsson E, Sigmundsson T, Buizer-Voskamp JE, Hansen T, Jakobsen KD, Muglia P, Francks C, Matthews PM, Gylfason A, Halldorsson BV, Gudbjartsson D, Thorgeirsson TE, Sigurdsson A, Jonasdottir A, Jonasdottir A, Bjornsson A, Mattiasdottir S, Blondal T, Haraldsson M, Magnusdottir BB, Giegling I, Möller HJ, Hartmann A, Shianna KV, Ge D, Need AC, Crombie C, Fraser G, Walker N, Lonnqvist J, Suvisaari J, Tuulio-Henriksson A, Paunio T, Touloupoulou T, Bramon E, Di Forti M, Murray R, Ruggeri M, Vassos E, Tosato S, Walshe M, Li T, Vasilescu C, Mühleisen TW, Wang AG, Ullum H, Djurovic S, Melle I, Olesen J, Kiemenev LA, Franke B; GROUP, Sabatti C, Freimer NB, Gulcher JR, Thorsteinsdottir U, Kong A, Andreassen OA, Ophoff RA, Georgi A, Rietschel M, Werge T, Petursson H, Goldstein DB, Nöthen MM, Peltonen L, Collier DA, St Clair D, Stefansson K. Large recurrent microdeletions associated with schizophrenia. *Nature*. 2008; 455(7210):232-6
9. Kirov G, Grozeva D, Norton N, Ivanov D, Mantripragada KK, Holmans P; International Schizophrenia Consortium; Wellcome Trust Case Control Consortium, Craddock N, Owen MJ, O'Donovan MC. Support for the involvement of large copy number variants in the pathogenesis of schizophrenia. *Hum Mol Genet*. 2009; 18(8):1497-503
10. Levinson DF, Duan J, Oh S, Wang K, Sanders AR, Shi J, Zhang N, Mowry BJ, Olincy A, Amin F, Cloninger CR, Silverman JM, Buccola NG, Byerley WF, Black DW, Kendler KS, Freedman R, Dudbridge F, Pe'er I, Hakonarson H, Bergen SE, Fanous AH, Holmans PA, Gejman PV.

Copy number variants in schizophrenia: confirmation of five previous findings and new evidence for 3q29 microdeletions and VIPR2 duplications. [Am J Psychiatry](#). 2011; 168(3):302-16

11. Vacic V, McCarthy S, Malhotra D, Murray F, Chou HH, Peoples A, Makarov V, Yoon S, Bhandari A, Corominas R, Iakoucheva LM, Krastoshevsky O, Krause V, Larach-Walters V, Welsh DK, Craig D, Kelsoe JR, Gershon ES, Leal SM, Dell Aquila M, Morris DW, Gill M, Corvin A, Insel PA, McClellan J, King MC, Karayiorgou M, Levy DL, DeLisi LE, Sebat J. Duplications of the neuropeptide receptor gene VIPR2 confer significant risk for schizophrenia. [Nature](#). 2011; 471(7339):499-503

12. Kirov G, Pocklington AJ, Holmans P, Ivanov D, Ikeda M, Ruderfer D, Moran J, Chambert K, Toncheva D, Georgieva L, Grozeva D, Fjodorova M, Wollerton R, Rees E, Nikolov I, van de Lagemaat LN, Bayés A, Fernandez E, Olason PI, Böttcher Y, Komiyama NH, Collins MO, Choudhary J, Stefansson K, Stefansson H, Grant SG, Purcell S, Sklar P, O'Donovan MC, Owen MJ. De novo CNV analysis implicates specific abnormalities of postsynaptic signalling complexes in the pathogenesis of schizophrenia. *Mol Psychiatry*. 2012; 17(2):142-53

13 Gulsuner S, Walsh T, Watts AC, Lee MK, Thornton AM, Casadei S, Rippey C, Shahin H; Consortium on the Genetics of Schizophrenia (COGS); PAARTNERS Study Group, Nimgaonkar VL, Go RC, Savage RM, Swerdlow NR, Gur RE, Braff DL, King MC, McClellan JM. Spatial and temporal mapping of de novo mutations in schizophrenia to a fetal prefrontal cortical network. *Cell*. 2013; 154(3):518-29

14. Xu B, Ionita-Laza I, Roos JL, Boone B, Woodrick S, Sun Y, Levy S, Gogos JA, Karayiorgou M. De novo gene mutations highlight patterns of genetic and neural complexity in schizophrenia. *Nat Genet*. 2012; 44(12):1365-9

15. Xu B, Roos JL, Dexheimer P, Boone B, Plummer B, Levy S, Gogos JA, Karayiorgou M. Exome sequencing supports a de novo mutational paradigm for schizophrenia. *Nat Genet*. 2011; 43(9):864-8

16. Girard SL, Gauthier J, Noreau A, Xiong L, Zhou S, Jouan L, Dionne-Laporte A, Spiegelman D, Henrion E, Diallo O, Thibodeau P, Bachand I, Bao JY, Tong AH, Lin CH, Millet B, Jaafari N, Joober R, Dion PA, Lok S, Krebs MO, Rouleau GA. Increased exonic de novo mutation rate in individuals with schizophrenia. *Nat Genet*. 2011; 43(9):860-3

17. Sanders SJ, Ercan-Sencicek AG, Hus V, Luo R, Murtha MT, Moreno-De-Luca D, Chu SH, Moreau MP, Gupta AR, Thomson SA, Mason CE, Bilguvar K, Celestino-Soper PB, Choi M, Crawford EL, Davis L, Wright NR, Dhodapkar RM, DiCola M, DiLullo NM, Fernandez TV, Fielding-Singh V, Fishman DO, Frahm S, Garagaloyan R, Goh GS, Kammela S, Klei L, Lowe JK, Lund SC, McGrew AD, Meyer KA, Moffat WJ, Murdoch JD, O'Roak BJ, Ober GT, Pottenger RS, Raubeson MJ, Song Y, Wang Q, Yaspan BL, Yu TW, Yurkiewicz IR, Beaudet AL, Cantor RM, Curland M, Grice DE, Günel M, Lifton RP, Mane SM, Martin DM, Shaw CA, Sheldon M, Tischfield JA, Walsh CA, Morrow EM, Ledbetter DH, Fombonne E, Lord C, Martin CL, Brooks AI, Sutcliffe JS, Cook EH Jr, Geschwind D, Roeder K, Devlin B, State MW. Multiple recurrent de novo CNVs, including duplications of the 7q11.23 Williams syndrome region, are strongly associated with autism. [Neuron](#). 2011; 70(5):863-85

18 Levy D, Ronemus M, Yamrom B, Lee YH, Leotta A, Kendall J, Marks S, Lakshmi B, Pai D, Ye K, Buja A, Krieger A, Yoon S, Troge J, Rodgers L, Iossifov I, Wigler M. Rare de novo and transmitted copy-number variation in autistic spectrum disorders. *Neuron*. 2011; 70(5):886-97

19. Pinto D, Pagnamenta AT, Klei L, Anney R, Merico D, Regan R, Conroy J, Magalhaes TR, Correia C, Abrahams BS, Almeida J, Bacchelli E, Bader GD, Bailey AJ, Baird G, Battaglia A, Berney T, Bolshakova N, Bölte S, Bolton PF, Bourgeron T, Brennan S, Brian J, Bryson SE, Carson AR, Casallo G, Casey J, Chung BH, Cochrane L, Corsello C, Crawford EL, Crossett A, Cytrynbaum C, Dawson G, de Jonge M, Delorme R, Drmic I, Duketic E, Duque F, Estes A, Farrar P, Fernandez BA, Folstein SE, Fombonne E, Freitag CM, Gilbert J, Gillberg C, Glessner JT, Goldberg J, Green A, Green J, Guter SJ, Hakonarson H, Heron EA, Hill M, Holt R, Howe JL, Hughes G, Hus V, Iglizzo R, Kim C, Klauck SM, Kolevzon A, Korvatska O, Kustanovich V, Lajonchere CM, Lamb JA, Laskawiec M, Leboyer M, Le Couteur A, Leventhal BL, Lionel AC, Liu XQ, Lord C, Lotspeich L, Lund SC, Maestrini E, Mahoney W, Mantoulan C, Marshall CR, McConachie H, McDougale CJ, McGrath J, McMahon WM, Merikangas A, Migita O, Minshew NJ, Mirza GK, Munson J, Nelson SF, Noakes C, Noor A, Nygren G, Oliveira G, Papanikolaou K, Parr JR, Parrini B, Paton T, Pickles A, Pilorge M, Piven J, Ponting CP, Posey DJ, Poustka A, Poustka F, Prasad A, Ragoussis J, Renshaw K, Rickaby J, Roberts W, Roeder K, Roge B, Rutter ML, Bierut LJ, Rice JP, Salt J, Sansom K, Sato D, Segurado R, Sequeira AF, Senman L, Shah N, Sheffield VC, Soorya L, Sousa I, Stein O, Sykes N, Stoppioni V, Strawbridge C, Tancredi R, Tansey K, Thiruvahindrapuram B, Thompson AP, Thomson S, Tryfon A, Tsiantis J, Van Engeland H, Vincent JB, Volkmar F, Wallace S, Wang K, Wang Z, Wassink TH, Webber C, Weksberg R, Wing K, Wittmeyer K, Wood S, Wu J, Yaspan BL, Zurawiecki D, Zwaigenbaum L, Buxbaum JD, Cantor RM, Cook EH, Coon H, Cuccaro ML, Devlin B, Ennis S, Gallagher L, Geschwind DH, Gill M, Haines JL, Hallmayer J, Miller J, Monaco AP, Nurnberger JI Jr, Paterson AD, Pericak-Vance MA, Schellenberg GD, Szatmari P, Vicente AM, Vieland VJ, Wijsman EM, Scherer SW, Sutcliffe JS, Betancur C. Functional impact of global rare copy number variation in autism spectrum disorders. [Nature](#). 2010; 466(7304):368-72

20. Itsara A, Wu H, Smith JD, Nickerson DA, Romieu I, London SJ, Eichler EE. De novo rates and selection of large copy number variation. [Genome Res](#). 2010; 20(11):1469-81

21. Marshall CR, Noor A, Vincent JB, Lionel AC, Feuk L, Skaug J, Shago M, Moessner R, Pinto D, Ren Y, Thiruvahindrapuram B, Fiebig A, Schreiber S, Friedman J, Ketelaars CE, Vos YJ, Ficioglu C, Kirkpatrick S, Nicolson R, Sloman L, Summers A, Gibbons CA, Teebi A, Chitayat

- D, Weksberg R, Thompson A, Vardy C, Crosbie V, Luscombe S, Baatjes R, Zwaigenbaum L, Roberts W, Fernandez B, Szatmari P, Scherer SW. Structural variation of chromosomes in autism spectrum disorder. *Am J Hum Genet.* 2008; 82(2):477-88
22. Sebat J, Lakshmi B, Malhotra D, Troge J, Lese-Martin C, Walsh T, Yamrom B, Yoon S, Krasnitz A, Kendall J, Leotta A, Pai D, Zhang R, Lee YH, Hicks J, Spence SJ, Lee AT, Puura K, Lehtimäki T, Ledbetter D, Gregersen PK, Bregman J, Sutcliffe JS, Jobanputra V, Chung W, Warburton D, King MC, Skuse D, Geschwind DH, Gilliam TC, Ye K, Wigler M. Strong association of de novo copy number mutations with autism. *Science.* 2007; 316(5823):445-9
23. <https://gene.sfari.org/autdb/Welcome.do>
24. Sklar, P et al., *Psychiatric GWAS Consortium Bipolar Disorder Working Group*. Large-scale genome-wide association analysis of bipolar disorder identifies a new susceptibility locus near ODZ4. Large-scale genome-wide association analysis of bipolar disorder identifies a new susceptibility locus near ODZ4. *Nat Genet.* 2011; 43(10):977-83
25. Baum [AE](#), [Akula N](#), [Cabanero M](#), [Cardona I](#), [Corona W](#), [Klemens B](#), [Schulze TG](#), [Cichon S](#), [Rietschel M](#), [Nöthen MM](#), [Georgi A](#), [Schumacher J](#), [Schwarz M](#), [Abou Jamra R](#), [Höfels S](#), [Propping P](#), [Satagopan J](#), [Detera-Wadleigh SD](#), [Hardy J](#), [McMahon FJ](#). A genome-wide association study implicates diacylglycerol kinase eta (DGKH) and several other genes in the etiology of bipolar disorder. *Mol Psychiatry.* 2008; 13(2):197-207
26. Cichon S, Mühleisen TW, Degenhardt FA, Mattheisen M, Miró X, Strohmaier J, Steffens M, Meesters C, Herms S, Weingarten M, Priebe L, Haenisch B, Alexander M, Vollmer J, Breuer R, Schmäli C, Tessmann P, Moebus S, Wichmann HE, Schreiber S, Müller-Myhsok B, Lucae S, Jamain S, Leboyer M, Bellivier F, Etain B, Henry C, Kahn JP, Heath S; Bipolar Disorder Genome Study (BiGS) Consortium, Hamshere M, O'Donovan MC, Owen MJ, Craddock N, Schwarz M, Vedder H, Kammerer-Ciernioch J, Reif A, Sasse J, Bauer M, Hautzinger M, Wright A, Mitchell PB, Schofield PR, Montgomery GW, Medland SE, Gordon SD, Martin NG, Gustafsson O, Andreassen O, Djurovic S, Sigurdsson E, Steinberg S, Stefansson H, Stefansson K, Kapur-Pojiskic L, Oruc L, Rivas F, Mayoral F, Chuchalin A, Babadjanova G, Tiganov AS, Pantelejeva G, Abramova LI, Grigoriou-Serbanescu M, Diaconu CC, Czerski PM, Hauser J, Zimmer A, Lathrop M, Schulze TG, Wienker TF, Schumacher J, Maier W, Propping P, Rietschel M, Nöthen MM. Genome-wide association study identifies genetic variation in neurocan as a susceptibility factor for bipolar disorder. *Am J Hum Genet.* 2011; 88(3):372-81
27. Chen DT, Jiang X, Akula N, Shugart YY, Wendland JR, Steele CJ, Kassem L, Park JH, Chatterjee N, Jamain S, Cheng A, Leboyer M, Muglia P, Schulze TG, Cichon S, Nöthen MM, Rietschel M; BiGS, McMahon FJ, Kelsoe JR, Greenwood TA, Nievergelt CM, McKinney R, Shilling PD, Schork NJ, Smith EN, Bloss CS, Nurnberger JI Jr, Edenberg HJ, Foroud T, Koller DL, Gershon ES, Liu C, Badner JA, Scheftner WA, Lawson WB, Nwulia EA, Hipolito M, Coryell W, Rice J, Byerley W, McMahon FJ, Chen DT, Berrettini WH, Potash JB, Zandi PP, Mahon PB, McInnis MG, Zöllner S, Zhang P, Craig DW, Szelinger S, Barrett TB, Schulze TG. Genome-wide association study meta-analysis of European and Asian-ancestry samples identifies three novel loci associated with bipolar disorder. *Mol Psychiatry.* 2013; 18(2):195-205
28. Moeschler JB, Shevell M; American Academy of Pediatrics Committee on Genetics. Clinical genetic evaluation of the child with mental retardation or developmental delays. *Pediatrics.* 2006; 117(6):2304-16
29. Bertram L, McQueen MB, Mullin K, Blacker D, Tanzi RE. Systematic meta-analyses of Alzheimer disease genetic association studies: the AlzGene database. *Nat Genet.* 2007; 39(1):17-23
30. Lill CM, Roehr JT, McQueen MB, Kavvoura FK, Bagade S, Schjeide BM, Schjeide LM, Meissner E, Zauft U, Allen NC, Liu T, Schilling M, Anderson KJ, Beecham G, Berg D, Biernacka JM, Brice A, Destefano AL, Do CB, Eriksson N, Factor SA, Farrer MJ, Foroud T, Gasser T, Hamza T, Hardy JA, Heutink P, Hill-Burns EM, Klein C, Latourelle JC, Maraganore DM, Martin ER, Martinez M, Myers RH, Nalls MA, Pankratz N, Payami H, Satake W, Scott WK, Sharma M, Singleton AB, Stefansson K, Toda T, Tung JY, Vance J, Wood NW, Zabetian CP; 23andMe, The Genetic Epidemiology of Parkinson's Disease (GEO-PD) Consortium; The International Parkinson's Disease Genomics Consortium (IPDGC); The Parkinson's Disease GWAS Consortium; The Wellcome Trust Case Control Consortium 2 (WTCCC2), Young P, Tanzi RE, Khoury MJ, Zipp F, Lehrach H, Ioannidis JP, Bertram L. "Comprehensive Research Synopsis and Systematic Meta-Analyses in Parkinson's Disease Genetics: The PDGene Database." *PLoS Genet.* 2012; 8(3):e1002548
31. Lill CM, Roehr JT, McQueen MB, Bagade S, Schjeide BM, Zipp F, Bertram L. The MSGene Database. Alzheimer Research Forum. Available at <http://www.msgene.org/>.
32. Gagnon-Bartsch JA, Speed TP. Using control genes to correct for unwanted variation in microarray data. *Biostatistics.* 2012; 13(3):539-52
33. Falcon S, Gentleman R. Using GOstats to test gene lists for GO term association. *Bioinformatics.* 2007; 23(2):257-8
34. Smyth, GK (2005). Limma: linear models for microarray data. In: 'Bioinformatics and Computational Biology Solutions using R and Bioconductor'. R. Gentleman, V. Carey, S. Dudoit, R. Irizarry, W. Huber (eds), Springer, New York, pages 397-420.



35. Calvano SE, Xiao W, Richards DR, Felciano RM, Baker HV, Cho RJ, Chen RO, Brownstein BH, Cobb JP, Tschoeke SK, Miller-Graziano C, Moldawer LL, Mindrinos MN, Davis RW, Tompkins RG, Lowry SF; Inflamm and Host Response to Injury Large Scale Collab. Res. Program. "A network-based analysis of systemic inflammation in humans". *Nature*. 2005 Oct 13;437 (7061):1032-7.

## SUPPLEMENTARY TABLES

**Supplementary Table 1: “Fetal Effect Analysis”, by disease-associated gene set and gene:** Regression analysis results for each gene in a disease-associated gene set that mapped to a microarray probe (t-statistic, Regression Coefficient (i.e. “Fetal Effect), p-value, Adjusted R2)

**Supplementary Table 2: Overlap Category:** Of the 10 gene sets, the subset of 62 genes that overlapped more than one diagnostic category.

**Supplementary Table 3: Gene Set Enrichment Analysis:** Gene set enrichment analysis, indicating significant GO terms. Unadjusted p-values, corrected FDR and Bonferonni p-values are listed, and the size of a significant gene set and the count-number of genes enriched for a GO term.

**Supplementary Table 4: Co-expression Analysis:** Correlation analysis for disease-associated and pre-natally enriched genes (listed by gene set) assessed across 38 fetal samples, using a Pearson’s correlation coefficient threshold of 0.8.

**Supplementary Table 5: ASD/CNV Loci:** Each gene investigated at an ASD and/or SCZ associated locus and its “fetal effect”/regression coefficient. Genes with a fetal effect greater than 0.5 are highlighted in red and genes with a fetal effect greater than 1 are shaded.

Supp Table 1 Gene Sets

| Gene Set          | Gene Symbol | EntrezGene ID | Description                                                                                  | Location          | Genetic Evidence                | Beta Coefficient ("Fetal Effect") | t-statistic | p-value  | Adjusted R2 | Probe ID  | Ref Seq Accession |
|-------------------|-------------|---------------|----------------------------------------------------------------------------------------------|-------------------|---------------------------------|-----------------------------------|-------------|----------|-------------|-----------|-------------------|
| NDD               | AUTS2       | 26053         | autism susceptibility candidate 2                                                            | 7q11.22           | Balanced Chromosome Abnormality | 3.12                              | 33.97       | 4.92E-93 | 0.81        | hHC003332 | NM_015570         |
| NDD               | ANK3        | 288           | ankyrin 3, node of Ranvier (ankyrin G)                                                       | 10q21             | Balanced Chromosome Abnormality | 2.42                              | 22.94       | 4.18E-62 | 0.65        | hHA034365 | NM_020987         |
| NDD               | SOX5        | 6660          | SRY (sex determining region Y)-box 5                                                         | 12p12.1           | Balanced Chromosome Abnormality | 2.23                              | 20.12       | 3.37E-53 | 0.58        | hHA035450 | NM_006940         |
| NDD               | SATB2       | 23314         | SATB homeobox 2                                                                              | 2q33              | Balanced Chromosome Abnormality | 2.02                              | 20.69       | 5.02E-55 | 0.60        | hHC001764 | NM_015265         |
| NDD               | PDE10A      | 10846         | phosphodiesterase 10A                                                                        |                   | Balanced Chromosome Abnormality | 1.91                              | 17.25       | 9.87E-44 | 0.50        | hHE040838 | NM_006661         |
| NDD               | SPAST       | 6683          | spastin                                                                                      | 2p24-p21          | Balanced Chromosome Abnormality | 1.44                              | 22.92       | 4.52E-62 | 0.65        | hHC004698 | NM_014946         |
| NDD               | EHMT1       | 79813         | euchromatic histone-lysine N-methyltransferase 1                                             | 9q34.3            | Balanced Chromosome Abnormality | 1.28                              | 20.96       | 6.76E-56 | 0.60        | hHC013184 | AB058779          |
| NDD               | ITGB1       | 3688          | integrin, beta 1 (fibronectin receptor, beta polypeptide, antigen CD29 includes MDF2, MSK12) | 10p11.2           | Balanced Chromosome Abnormality | 0.81                              | 9.97        | 8.97E-20 | 0.20        | hHC004253 | NM_002211         |
| NDD               | ZBTB20      | 26137         | zinc finger and BTB domain containing 20                                                     | 3q13.2            | Balanced Chromosome Abnormality | 0.82                              | 9.18        | 2.22E-17 | 0.17        | hHC019897 | NM_015642         |
| NDD               | METTL2B     | 55798         | methyltransferase like 2B                                                                    | 7q32.1            | Balanced Chromosome Abnormality | 0.87                              | 11.09       | 2.69E-23 | 0.26        | hHR030073 | NM_018396         |
| NDD               | FAM107B     | 83641         | family with sequence similarity 107, member B                                                | 10p13             | Balanced Chromosome Abnormality | 0.58                              | 4.19        | 3.88E-05 | -0.05       | hHC029691 | NM_031453         |
| NDD               | TCF4        | 6925          | transcription factor 4                                                                       | 18q21.1           | Balanced Chromosome Abnormality | 0.80                              | 12.62       | 2.92E-28 | 0.32        | hHC020459 | NM_001083962      |
| NDD               | CDK5RAP2    | 55755         | CDK5 regulatory subunit associated protein 2                                                 | 9q33.2            | Balanced Chromosome Abnormality | 0.68                              | 7.80        | 1.96E-13 | 0.10        | hHC012789 | NM_018249         |
| NDD               | MBD5        | 55777         | methyl-CpG binding domain protein 5                                                          | 2q23.1            | Balanced Chromosome Abnormality | 0.77                              | 12.57       | 4.17E-28 | 0.32        | hHC004339 | NM_018328         |
| NDD               | SNTG2       | 54221         | syntrophin, gamma 2                                                                          | 2p25.3            | Balanced Chromosome Abnormality | 0.58                              | 4.29        | 2.56E-05 | -0.05       | hHR008345 | NM_018968         |
| NDD               | ZNF804A     | 91752         | zinc finger protein 804A                                                                     | 2q32.1            | Balanced Chromosome Abnormality | 0.54                              | 4.35        | 2.06E-05 | -0.05       | hHC001802 | NM_194250         |
| NDD               | SMG6        | 23293         | Smg-6 homolog, nonsense mediated mRNA decay factor (C. elegans)                              | 17p13.3           | Balanced Chromosome Abnormality | 0.40                              | 6.66        | 1.91E-10 | 0.05        | hHC018992 | NM_017575         |
| NDD               | ZNF507      | 22847         | zinc finger protein 507                                                                      | 19q13.11          | Balanced Chromosome Abnormality | 0.21                              | 2.64        | 8.96E-03 | -0.10       | hHC007828 | NM_001136156      |
| NDD               | FOXP1       | 27086         | forkhead box P1                                                                              | 3p14.1            | Balanced Chromosome Abnormality | 0.10                              | 1.11        | 2.69E-01 | -0.12       | hHC002879 | NM_032682         |
| NDD               | CHD8        | 57680         | chromodomain helicase DNA binding protein 8                                                  | 14q11.2           | Balanced Chromosome Abnormality | 0.26                              | 5.23        | 3.66E-07 | -0.01       | hHR011006 | NM_020920         |
| NDD               | GRIN2B      | 2904          | glutamate receptor, ionotropic, N-methyl D-aspartate 2B                                      | 12p12             | Balanced Chromosome Abnormality | 0.13                              | 2.02        | 4.46E-02 | -0.11       | hHC022772 | NM_000834         |
| NDD               | CDKL5       | 6792          | cyclin-dependent kinase-like 5                                                               | Xp22              | Balanced Chromosome Abnormality | 0.13                              | 1.57        | 1.18E-01 | -0.12       | hHC018635 | NM_003159         |
| NDD               | SNRPN       | 6638          | small nuclear ribonucleoprotein polypeptide N                                                | 15q11.2           | Balanced Chromosome Abnormality | 0.09                              | 0.80        | 4.23E-01 | -0.13       | hHR008158 | AF400501          |
| NDD               | PON3        | 5446          | paraoxonase 3                                                                                | 7q21.3            | Balanced Chromosome Abnormality | 0.09                              | 0.78        | 4.34E-01 | -0.13       | hHC013743 | NM_000940         |
| NDD               | C18orf1     | 753           | chromosome 18 open reading frame 1                                                           | 18p11.2           | Balanced Chromosome Abnormality | -0.04                             | -0.41       | 6.79E-01 | -0.13       | hHC001974 | NM_001003674      |
| NDD               | ZNHIT6      | 54680         | zinc finger, HIT type 6                                                                      | 1p22.3            | Balanced Chromosome Abnormality | -0.07                             | -1.49       | 1.39E-01 | -0.12       | hHC008348 | NM_017953         |
| NDD               | GTF2F1      | 2962          | general transcription factor IIF, polypeptide 1, 74kDa                                       | 19p13.3           | Balanced Chromosome Abnormality | -0.12                             | -2.93       | 3.77E-03 | -0.09       | hHC026723 | NM_002096         |
| NDD               | UTRN        | 7402          | utrophin                                                                                     | 6q24              | Balanced Chromosome Abnormality | -0.20                             | -2.69       | 7.63E-03 | -0.10       | hHR020245 | NM_007124         |
| NDD               | NLRP1       | 22861         | NLR family, pyrin domain containing 1                                                        | 17p13.2           | Balanced Chromosome Abnormality | -0.49                             | -5.82       | 1.88E-08 | 0.01        | hHR021670 | NM_033004         |
| NDD               | GNA14       | 9630          | guanine nucleotide binding protein (G protein), alpha 14                                     | 9q21              | Balanced Chromosome Abnormality | -1.38                             | -11.95      | 4.66E-26 | 0.29        | hHC012888 | NM_004297         |
| NDD               | SNURF       | 8926          | SNRPN upstream reading frame                                                                 | 15q11.2           | Balanced Chromosome Abnormality | -1.69                             | -25.02      | 1.84E-68 | 0.69        | hHA033189 | NM_005678         |
| SCZ Meta-analysis | NRG1        | 3084          | neuregulin 1                                                                                 | 8p12              | GWAS                            | 2.34                              | 17.10       | 2.91E-43 | 0.49        | hHA033957 | NM_004495         |
| SCZ Meta-analysis | PLXNA2      | 5362          | plexin A2                                                                                    | 1q32.2            | GWAS                            | 1.31                              | 9.14        | 2.93E-17 | 0.16        | hHC010960 | NM_025179         |
| SCZ Meta-analysis | SRR         | 63826         | serine racemase                                                                              | 17p13             | GWAS                            | 1.28                              | 16.63       | 1.10E-41 | 0.48        | hHC016218 | NM_021947         |
| SCZ Meta-analysis | AKT1        | 207           | v-akt murine thymoma viral oncogene homolog 1                                                | 14q32.32 14q32.32 | GWAS                            | 0.95                              | 15.83       | 5.46E-39 | 0.45        | hHC010439 | NM_005163         |
| SCZ Meta-analysis | TCF4        | 6925          | transcription factor 4                                                                       | 18q21.1           | GWAS                            | 0.80                              | 12.62       | 2.92E-28 | 0.32        | hHC020459 | NM_001083962      |
| SCZ Meta-analysis | DTNBP1      | 84062         | dystrobrevin binding protein 1                                                               | 6p22.3            | GWAS                            | 0.60                              | 7.16        | 1.02E-11 | 0.07        | hHA035123 | NM_183040         |
| SCZ Meta-analysis | ZNF804A     | 91752         | zinc finger protein 804A                                                                     | 2q32.1            | GWAS                            | 0.54                              | 4.35        | 2.06E-05 | -0.05       | hHC001802 | NM_194250         |

Supp Table 1 Gene Sets

| Gene Set          | Gene Symbol | EntrezGene ID | Description                                                                          | Location                 | Genetic Evidence | Beta Coefficient ("Fetal Effect") | t-statistic | p-value   | Adjusted R2 | Probe ID  | Ref Seq Accession |
|-------------------|-------------|---------------|--------------------------------------------------------------------------------------|--------------------------|------------------|-----------------------------------|-------------|-----------|-------------|-----------|-------------------|
| SCZ Meta-analysis | MTHFR       | 4524          | 5,10-methylenetetrahydrofolate reductase (NADPH)                                     | 1p36.3                   | GWAS             | 0.54                              | 5.23        | 3.69E-07  | -0.01       | hHC015904 | NM_005957         |
| SCZ Meta-analysis | PPP3CC      | 5533          | protein phosphatase 3 (formerly 2B), catalytic subunit, gamma isoform                | 8p21.3                   | GWAS             | 0.37                              | 6.77        | 9.80E-11  | 0.05        | hHC017654 | NM_005605         |
| SCZ Meta-analysis | RPP21       | 79897         | ribonuclease P/MRP 21kDa subunit                                                     | 6p21.33                  | GWAS             | 0.22                              | 4.43        | 1.44E-05  | -0.04       | hHC023511 | NM_024839         |
| SCZ Meta-analysis | MDGA1       | 266727        | MAM domain containing glycosylphosphatidylinositol anchor 1                          | 6p21                     | GWAS             | 0.28                              | 3.72        | 2.49E-04  | -0.07       | hHC011932 | NM_153487         |
| SCZ Meta-analysis | HIST1H2BJ   | 8970          | histone cluster 1, H2bj                                                              | 6p22.1                   | GWAS             | 0.18                              | 1.97        | 4.98E-02  | -0.11       | hHC025199 | NM_021058         |
| SCZ Meta-analysis | RPGRIP1L    | 23322         | RPGRIP1-like                                                                         | 16q12.2                  | GWAS             | 0.09                              | 1.07        | 2.88E-01  | -0.13       | hHC011173 | NM_015272         |
| SCZ Meta-analysis | RELN        | 5649          | reelin                                                                               | 7q22                     | GWAS             | 0.25                              | 1.83        | 6.86E-02  | -0.12       | hHC004991 | NM_005045         |
| SCZ Meta-analysis | GRIN2B      | 2904          | glutamate receptor, ionotropic, N-methyl D-aspartate 2B                              | 12p12                    | GWAS             | 0.13                              | 2.02        | 4.46E-02  | -0.11       | hHC022772 | NM_000834         |
| SCZ Meta-analysis | DRD2        | 1813          | dopamine receptor D2                                                                 | 11q23                    | GWAS             | 0.22                              | 2.30        | 2.24E-02  | -0.11       | hHA035616 | NM_000795         |
| SCZ Meta-analysis | SLC18A1     | 6570          | solute carrier family 18 (vesicular monoamine), member 1                             | 8p21.3                   | GWAS             | 0.29                              | 2.42        | 1.64E-02  | -0.10       | hHC007643 | NM_001135691      |
| SCZ Meta-analysis | DRD4        | 1815          | dopamine receptor D4                                                                 | 11p15.5                  | GWAS             | 0.02                              | 0.28        | 7.78E-01  | -0.13       | hHC024251 | NM_000797         |
| SCZ Meta-analysis | DAO         | 1610          | D-amino-acid oxidase                                                                 | 12q24                    | GWAS             | -0.02                             | -0.13       | 8.95E-01  | -0.13       | hHC016344 | NM_001917         |
| SCZ Meta-analysis | GABRB2      | 2561          | gamma-aminobutyric acid (GABA) A receptor, beta 2                                    | 5q34                     | GWAS             | -0.21                             | -1.75       | 8.18E-02  | -0.12       | hHC009761 | NM_021911         |
| SCZ Meta-analysis | TPH1        | 7166          | tryptophan hydroxylase 1                                                             | 11p15.3-p14              | GWAS             | -0.18                             | -2.06       | 4.03E-02  | -0.11       | hHC019590 | NM_004179         |
| SCZ Meta-analysis | CCKAR       | 886           | cholecystokinin A receptor                                                           | 4p15.1-p15.2             | GWAS             | -0.07                             | -0.76       | 4.51E-01  | -0.13       | hHC013516 | NM_000730         |
| SCZ Meta-analysis | IL10        | 3586          | interleukin 10                                                                       | 1q31-q32                 | GWAS             | -0.07                             | -0.46       | 6.49E-01  | -0.13       | hHC008663 | NM_000572         |
| SCZ Meta-analysis | DAOA        | 267012        | D-amino acid oxidase activator                                                       | 13q33.2 13q34            | GWAS             | -0.18                             | -2.61       | 9.55E-03  | -0.10       | hHC017573 | NM_172370         |
| SCZ Meta-analysis | GRIK3       | 2899          | glutamate receptor, ionotropic, kainate 3                                            | 1p34-p33                 | GWAS             | -0.06                             | -0.88       | 3.80E-01  | -0.13       | hHC015531 | NM_000831         |
| SCZ Meta-analysis | COMT        | NA            | catechol-O-methyltransferase                                                         | 22q11.21-q11.23 22q11.21 | GWAS             | -0.28                             | -5.30       | 2.66E-07  | -0.01       | hHA032822 | NM_000754         |
| SCZ Meta-analysis | PDE4B       | 5142          | phosphodiesterase 4B, cAMP-specific (phosphodiesterase E4 dunce homolog, Drosophila) | 1p31                     | GWAS             | -0.49                             | -7.51       | 1.18E-12  | 0.09        | hHC005298 | NM_001037341      |
| SCZ Meta-analysis | NOTCH4      | 4855          | Notch homolog 4 (Drosophila)                                                         | 6p21.3                   | GWAS             | -0.58                             | -11.07      | 3.02E-23  | 0.25        | hHC013731 | NM_004557         |
| SCZ Meta-analysis | PRSS16      | 10279         | protease, serine, 16 (thymus)                                                        | 6p21                     | GWAS             | -0.55                             | -8.25       | 1.07E-14  | 0.12        | hHC020074 | NM_005865         |
| SCZ Meta-analysis | AHI1        | 54806         | Abelson helper integration site 1                                                    | 6q23.3                   | GWAS             | -1.06                             | -14.54      | 1.13E-34  | 0.40        | hHR010594 | NM_001134831      |
| SCZ Meta-analysis | HP          | 3240          | haptoglobin                                                                          | 16q22.1                  | GWAS             | -0.68                             | -3.81       | 1.80E-04  | -0.07       | hHC027418 | NM_005143         |
| SCZ Meta-analysis | IL1B        | 3553          | interleukin 1, beta                                                                  | 2q14                     | GWAS             | -1.99                             | -10.47      | 2.40E-21  | 0.23        | hHC022194 | NM_000576         |
| SCZ Meta-analysis | NRGN        | 4900          | neurogranin (protein kinase C substrate, RC3)                                        | 11q24                    | GWAS             | -2.49                             | -29.50      | 2.77E-81  | 0.76        | hHC004291 | NM_001126181      |
| SCZ Meta-analysis | HTR2A       | 3356          | 5-hydroxytryptamine (serotonin) receptor 2A                                          | 13q14-q21                | GWAS             | -2.85                             | -25.58      | 4.00E-70  | 0.70        | hHC015232 | NM_000621         |
| SCZ Meta-analysis | APOE        | 348           | apolipoprotein E                                                                     | 19q13.2                  | GWAS             | -2.54                             | -18.34      | 2.35E-47  | 0.53        | hHC024278 | NM_000041         |
| SCZ Meta-analysis | RGS4        | 5999          | regulator of G-protein signaling 4                                                   | 1q23.3                   | GWAS             | -5.57                             | -41.91      | 1.36E-111 | 0.87        | hHC004006 | NM_001102445      |
| SCZ PGC GWAS      | ABCB9       | 23457         | ATP-binding cassette, sub-family B (MDR/TAP), member 9                               | 12q24                    | GWAS             | 0.27                              | 3.72        | 2.51E-04  | -0.07       | hHA038202 | NM_203444         |
| SCZ PGC GWAS      | AK3         | 50808         | adenylate kinase 3                                                                   | 9p24.1-p24.3             | GWAS             | 0.42                              | 5.66        | 4.26E-08  | 0.00        | hHR021543 | NM_016282         |
| SCZ PGC GWAS      | AKT3        | 10000         | v-akt murine thymoma viral oncogene homolog 3 (protein kinase B, gamma)              | 1q43-q44                 | GWAS             | 1.79                              | 20.89       | 1.17E-55  | 0.60        | hHC012518 | NM_005465         |
| SCZ PGC GWAS      | ALAS1       | 211           | aminolevulinate, delta-, synthase 1                                                  | 3p21.1                   | GWAS             | 0.33                              | 6.42        | 7.35E-10  | 0.04        | hHA037941 | NM_000688         |
| SCZ PGC GWAS      | ARL3        | 403           | ADP-ribosylation factor-like 3                                                       | 10q23.3                  | GWAS             | 0.72                              | 12.12       | 1.28E-26  | 0.30        | hHR006410 | NM_004311         |
| SCZ PGC GWAS      | AS3MT       | 57412         | arsenic (+3 oxidation state) methyltransferase                                       | 10q24.32                 | GWAS             | 1.16                              | 13.66       | 1.04E-31  | 0.37        | hHC010261 | NM_020682         |
| SCZ PGC GWAS      | C10orf25    | 220979        | chromosome 10 open reading frame 25                                                  | 10q11.21                 | GWAS             | 0.66                              | 6.92        | 4.15E-11  | 0.06        | hHC005884 | NM_001039380      |
| SCZ PGC GWAS      | C10orf26    | 54838         | chromosome 10 open reading frame 26                                                  | 10q24.32                 | GWAS             | 0.23                              | 3.89        | 1.31E-04  | -0.06       | hHC025418 | NM_017787         |

Supp Table 1 Gene Sets

| Gene Set     | Gene Symbol | EntrezGene ID | Description                                                       | Location     | Genetic Evidence | Beta Coefficient ("Fetal Effect") | t-statistic | p-value   | Adjusted R2 | Probe ID  | Ref Seq Accession |
|--------------|-------------|---------------|-------------------------------------------------------------------|--------------|------------------|-----------------------------------|-------------|-----------|-------------|-----------|-------------------|
| SCZ PGC GWAS | C12orf65    | 91574         | chromosome 12 open reading frame 65                               | 12q24.31     | GWAS             | 0.56                              | 5.05        | 8.67E-07  | -0.02       | hHC008880 | NM_152269         |
| SCZ PGC GWAS | C2orf47     | 79568         | chromosome 2 open reading frame 47                                | 2q33.1       | GWAS             | 0.18                              | 4.01        | 7.99E-05  | -0.06       | hHC012467 | NM_024520         |
| SCZ PGC GWAS | C2orf56     | 55471         | chromosome 2 open reading frame 56                                | 2p22.2       | GWAS             | 0.28                              | 5.33        | 2.29E-07  | -0.01       | hHC022081 | NM_144736         |
| SCZ PGC GWAS | C2orf60     | 129450        | chromosome 2 open reading frame 60                                | 2q33.1       | GWAS             | 0.67                              | 10.89       | 1.14E-22  | 0.25        | hHC008533 | NM_001039693      |
| SCZ PGC GWAS | C2orf69     | 205327        | chromosome 2 open reading frame 69                                | 2q33.1       | GWAS             | 0.03                              | 0.59        | 5.58E-01  | -0.13       | hHC023780 | NM_153689         |
| SCZ PGC GWAS | CACNA1C     | 775           | calcium channel, voltage-dependent, L type, alpha 1C subunit      |              | GWAS             | 0.45                              | 4.55        | 8.60E-06  | -0.04       | hHA037564 | NM_001129840      |
| SCZ PGC GWAS | CACNB2      | 783           | calcium channel, voltage-dependent, beta 2 subunit                | 10p12        | GWAS             | 0.08                              | 1.14        | 2.56E-01  | -0.12       | hHA034894 | NM_201590         |
| SCZ PGC GWAS | CALHM3      | 119395        | calcium homeostasis modulator 3                                   | 10q24.33     | GWAS             | 0.38                              | 4.13        | 5.05E-05  | -0.05       | hHC016032 | NM_001129742      |
| SCZ PGC GWAS | CDK2AP1     | 8099          | cyclin-dependent kinase 2 associated protein 1                    | 12q24.31     | GWAS             | 0.13                              | 1.63        | 1.03E-01  | -0.12       | hHC026423 | NM_004642         |
| SCZ PGC GWAS | CEBPZ       | 10153         | CCAAT/enhancer binding protein (C/EBP), zeta                      | 2p22.2       | GWAS             | 0.48                              | 8.88        | 1.67E-16  | 0.15        | hHC017981 | NM_005760         |
| SCZ PGC GWAS | CEP170      | 9859          | centrosomal protein 170kDa                                        | 1q44         | GWAS             | 2.31                              | 18.83       | 5.45E-49  | 0.55        | hHR021294 | NM_014812         |
| SCZ PGC GWAS | CNNM2       | 54805         | cyclin M2                                                         | 10q24.32     | GWAS             | 0.93                              | 9.37        | 5.98E-18  | 0.17        | hHA035949 | NM_199077         |
| SCZ PGC GWAS | FAM177A1    | 283635        | family with sequence similarity 177, member A1                    | 14q13.2      | GWAS             | 0.08                              | 1.11        | 2.70E-01  | -0.13       | hHC003086 | NM_001079519      |
| SCZ PGC GWAS | GATAD2A     | 54815         | GATA zinc finger domain containing 2A                             | 19p13.11     | GWAS             | 0.48                              | 4.45        | 1.31E-05  | -0.04       | hHA037609 | AK125974          |
| SCZ PGC GWAS | GIGYF2      | 26058         | GRB10 interacting GYF protein 2                                   | 2q37.1       | GWAS             | 0.46                              | 11.41       | 2.56E-24  | 0.27        | hHC020973 | NM_015575         |
| SCZ PGC GWAS | GLT8D1      | 55830         | glycosyltransferase 8 domain containing 1                         | 3p21.1       | GWAS             | 0.52                              | 9.52        | 2.18E-18  | 0.18        | hHC017657 | NM_001010983      |
| SCZ PGC GWAS | GMIP        | 51291         | GEM interacting protein                                           | 19p12-p11    | GWAS             | 0.34                              | 6.20        | 2.45E-09  | 0.03        | hHC013414 | NM_016573         |
| SCZ PGC GWAS | INA         | 9118          | internexin neuronal intermediate filament protein, alpha          | 10q24.33     | GWAS             | 0.19                              | 2.76        | 6.16E-03  | -0.10       | hHC003222 | NM_032727         |
| SCZ PGC GWAS | ITIH1       | 3697          | inter-alpha (globulin) inhibitor H1                               | 3p21.2-p21.1 | GWAS             | 0.01                              | 0.11        | 9.16E-01  | -0.13       | hHC022349 | NM_002215         |
| SCZ PGC GWAS | KIAA0391    | 9692          | KIAA0391                                                          | 14q13.2      | GWAS             | 0.40                              | 5.53        | 8.54E-08  | 0.00        | hHR011807 | AB002389          |
| SCZ PGC GWAS | LPAR2       | 9170          | lysophosphatidic acid receptor 2                                  | 19p12        | GWAS             | 3.19                              | 33.68       | 2.58E-92  | 0.80        | hHC018912 | NM_004720         |
| SCZ PGC GWAS | MMP16       | 4325          | matrix metalloproteinase 16 (membrane-inserted)                   | 8q21.3       | GWAS             | 1.33                              | 15.78       | 7.95E-39  | 0.45        | hHA035698 | NM_005941         |
| SCZ PGC GWAS | MPHOSPH9    | 10198         | M-phase phosphoprotein 9                                          | 12q24.31     | GWAS             | 1.09                              | 8.35        | 5.78E-15  | 0.13        | hHC002303 | NM_022782         |
| SCZ PGC GWAS | NCAN        | 1463          | neurocan                                                          | 19p12        | GWAS             | 1.30                              | 15.11       | 1.36E-36  | 0.42        | hHC008161 | NM_004386         |
| SCZ PGC GWAS | NEK4        | 6787          | NIMA (never in mitosis gene a)-related kinase 4                   | 3p21.1       | GWAS             | 0.40                              | 7.44        | 1.88E-12  | 0.08        | hHC006908 | NM_003157         |
| SCZ PGC GWAS | NT5C2       | 22978         | 5'-nucleotidase, cytosolic II                                     |              | GWAS             | 1.26                              | 12.56       | 4.46E-28  | 0.32        | hHE041640 | NM_012229         |
| SCZ PGC GWAS | NT5DC2      | 64943         | 5'-nucleotidase domain containing 2                               | 3p21.1       | GWAS             | 1.62                              | 17.99       | 3.39E-46  | 0.52        | hHC024330 | NM_022908         |
| SCZ PGC GWAS | NUCB2       | NA            | nucleobindin 2                                                    | 11p15.1-p14  | GWAS             | 0.62                              | 10.97       | 6.59E-23  | 0.25        | hHC008716 | AK097398          |
| SCZ PGC GWAS | NUDT1       | 4521          | nudix (nucleoside diphosphate linked moiety X)-type motif 1       | 7p22         | GWAS             | 1.27                              | 19.68       | 9.29E-52  | 0.57        | hHC024103 | NM_198949         |
| SCZ PGC GWAS | PBRM1       | 55193         | polybromo 1                                                       | 3p21         | GWAS             | 2.25                              | 42.58       | 5.14E-113 | 0.87        | hHC007983 | NM_018313         |
| SCZ PGC GWAS | PBX4        | 80714         | pre-B-cell leukemia homeobox 4                                    | 19p12        | GWAS             | 1.46                              | 19.12       | 6.39E-50  | 0.56        | hHC009226 | NM_025245         |
| SCZ PGC GWAS | PCGF6       | 84108         | polycomb group ring finger 6                                      | 10q24.33     | GWAS             | 0.55                              | 6.55        | 3.50E-10  | 0.04        | hHR027831 | NM_001011663      |
| SCZ PGC GWAS | PDCD11      | 22984         | programmed cell death 11                                          | 10q24.33     | GWAS             | 0.67                              | 11.43       | 2.26E-24  | 0.27        | hHR008588 | NM_014976         |
| SCZ PGC GWAS | PHF7        | 51533         | PHD finger protein 7                                              | 3p21.1       | GWAS             | 0.22                              | 2.72        | 7.03E-03  | -0.10       | hHC012761 | NM_016483         |
| SCZ PGC GWAS | PIK3C2A     | 5286          | phosphoinositide-3-kinase, class 2, alpha polypeptide             | 11p15.5-p14  | GWAS             | 0.87                              | 9.92        | 1.26E-19  | 0.20        | hHC012392 | NM_002645         |
| SCZ PGC GWAS | PLCB2       | 5330          | phospholipase C, beta 2                                           | 15q15        | GWAS             | 0.15                              | 3.72        | 2.50E-04  | -0.07       | hHC025905 | NM_004573         |
| SCZ PGC GWAS | PPP2R3C     | 55012         | protein phosphatase 2 (formerly 2A), regulatory subunit B", gamma | 14q13.2      | GWAS             | 1.06                              | 8.53        | 1.74E-15  | 0.13        | hHA034577 | NM_017917         |
| SCZ PGC GWAS | PRKD3       | 23683         | protein kinase D3                                                 | 2p22.2       | GWAS             | 0.32                              | 1.68        | 9.50E-02  | -0.12       | hHC007598 | BU685552          |

Supp Table 1 Gene Sets

| Gene Set     | Gene Symbol | EntrezGene ID | Description                                                                                | Location      | Genetic Evidence | Beta Coefficient ("Fetal Effect") | t-statistic | p-value  | Adjusted R2 | Probe ID  | Ref Seq Accession |
|--------------|-------------|---------------|--------------------------------------------------------------------------------------------|---------------|------------------|-----------------------------------|-------------|----------|-------------|-----------|-------------------|
| SCZ PGC GWAS | PSMA6       | 5687          | proteasome (prosome, macropain) subunit, alpha type, 6                                     | 14q13         | GWAS             | 0.31                              | 4.18        | 4.05E-05 | -0.05       | hHC023230 | AK302008          |
| SCZ PGC GWAS | QPCTL       | 54814         | glutaminyl-peptide cyclotransferase-like                                                   | 19q13.32      | GWAS             | 0.09                              | 1.43        | 1.53E-01 | -0.12       | hHC023489 | NM_017659         |
| SCZ PGC GWAS | RFT1        | 91869         | RFT1 homolog ( <i>S. cerevisiae</i> )                                                      |               | GWAS             | 0.34                              | 4.68        | 4.73E-06 | -0.03       | hHR013631 | NM_052859         |
| SCZ PGC GWAS | SDCCAG8     | 10806         | serologically defined colon cancer antigen 8                                               | 1q43-q44      | GWAS             | 0.65                              | 10.07       | 4.28E-20 | 0.21        | hHC002591 | NM_006642         |
| SCZ PGC GWAS | SETD8       | 387893        | SET domain containing (lysine methyltransferase) 8                                         | 12q24.31      | GWAS             | 0.24                              | 4.30        | 2.55E-05 | -0.05       | hHC032155 | NM_020382         |
| SCZ PGC GWAS | SFMBT1      | 51460         | Scm-like with four mbt domains 1                                                           | 3p21.1        | GWAS             | 0.49                              | 7.89        | 1.08E-13 | 0.10        | hHC019969 | NM_001005159      |
| SCZ PGC GWAS | SFXN2       | 118980        | sideroflexin 2                                                                             | 10q24.32      | GWAS             | 1.35                              | 19.15       | 5.05E-50 | 0.56        | hHC010043 | NM_178858         |
| SCZ PGC GWAS | SH3PXD2A    | 9644          | SH3 and PX domains 2A                                                                      | 10q24.33      | GWAS             | 0.09                              | 1.21        | 2.29E-01 | -0.12       | hHC020707 | NM_014631         |
| SCZ PGC GWAS | STT3A       | 3703          | STT3, subunit of the oligosaccharyltransferase complex, homolog A ( <i>S. cerevisiae</i> ) | 11q23.3       | GWAS             | 0.35                              | 7.22        | 6.82E-12 | 0.07        | hHC008282 | NM_152713         |
| SCZ PGC GWAS | TAF5        | 6877          | TAF5 RNA polymerase II, TATA box binding protein (TBP)-associated factor, 100kDa           | 10q24-q25.2   | GWAS             | 1.35                              | 19.44       | 5.55E-51 | 0.56        | hHA034238 | NM_006951         |
| SCZ PGC GWAS | TCF4        | 6925          | transcription factor 4                                                                     | 18q21.1       | GWAS             | 0.80                              | 12.62       | 2.92E-28 | 0.32        | hHC020459 | NM_001083962      |
| SCZ PGC GWAS | TLR9        | 54106         | toll-like receptor 9                                                                       | 3p21.3        | GWAS             | 0.07                              | 1.23        | 2.19E-01 | -0.12       | hHA039914 | NM_017442         |
| SCZ PGC GWAS | TM6SF2      | 53345         | transmembrane 6 superfamily member 2                                                       | 19p13.3-p12   | GWAS             | 0.35                              | 3.90        | 1.28E-04 | -0.06       | hHC015308 | NM_001001524      |
| SCZ PGC GWAS | WDR82       | 80335         | WD repeat domain 82                                                                        | 3p21.1        | GWAS             | 0.82                              | 17.15       | 2.11E-43 | 0.50        | hHC025830 | NM_025222         |
| SCZ PGC GWAS | ZEB2        | 9839          | zinc finger E-box binding homeobox 2                                                       | 2q22.3        | GWAS             | 1.50                              | 15.51       | 6.50E-38 | 0.44        | hHR029739 | NM_014795         |
| SCZ PGC GWAS | ZSWIM6      | 57688         | zinc finger, SWIM-type containing 6                                                        | 5q12.1        | GWAS             | 0.93                              | 8.47        | 2.61E-15 | 0.13        | hHR001783 | NM_020928         |
| SCZ PGC GWAS | ACRV1       | 56            | acrosomal vesicle protein 1                                                                | 11q23-q24     | GWAS             | -0.46                             | -4.13       | 5.00E-05 | -0.05       | hHC009898 | NM_001612         |
| SCZ PGC GWAS | ARL6IP4     | 51329         | ADP-ribosylation-like factor 6 interacting protein 4                                       | 12q24.31      | GWAS             | -1.30                             | -20.93      | 8.67E-56 | 0.60        | hHA038793 | NM_001002252      |
| SCZ PGC GWAS | BAP1        | 8314          | BRCA1 associated protein-1 (ubiquitin carboxy-terminal hydrolase)                          | 3p21.31-p21.2 | GWAS             | -0.52                             | -8.90       | 1.49E-16 | 0.15        | hHC018424 | NM_004656         |
| SCZ PGC GWAS | C10orf32    | 119032        | chromosome 10 open reading frame 32                                                        | 10q24.32      | GWAS             | -0.38                             | -6.25       | 1.92E-09 | 0.03        | hHC008933 | NM_001136200      |
| SCZ PGC GWAS | C2orf82     | 389084        | chromosome 2 open reading frame 82                                                         | 2q37.1        | GWAS             | -0.20                             | -3.13       | 1.97E-03 | -0.09       | hHC025626 | NM_206895         |
| SCZ PGC GWAS | CALHM1      | 255022        | calcium homeostasis modulator 1                                                            | 10q24.33      | GWAS             | -0.58                             | -6.07       | 5.00E-09 | 0.02        | hHC021341 | NM_001001412      |
| SCZ PGC GWAS | CALHM2      | 51063         | calcium homeostasis modulator 2                                                            | 10pter-q26.12 | GWAS             | -0.20                             | -2.92       | 3.85E-03 | -0.09       | hHA039430 | NM_015916         |
| SCZ PGC GWAS | CILP2       | 148113        | cartilage intermediate layer protein 2                                                     | 19p13.11      | GWAS             | -0.21                             | -4.72       | 3.96E-06 | -0.03       | hHC021470 | NM_153221         |
| SCZ PGC GWAS | CSMD1       | 64478         | CUB and Sushi multiple domains 1                                                           | 8p23.2        | GWAS             | -0.22                             | -3.55       | 4.59E-04 | -0.07       | hHR013460 | NM_033225         |
| SCZ PGC GWAS | CYP17A1     | 1586          | cytochrome P450, family 17, subfamily A, polypeptide 1                                     | 10q24.3       | GWAS             | -0.16                             | -2.36       | 1.90E-02 | -0.10       | hHC025148 | NM_000102         |
| SCZ PGC GWAS | DNAH1       | 25981         | dynein, axonemal, heavy chain 1                                                            |               | GWAS             | -1.91                             | -16.91      | 1.26E-42 | 0.49        | hHR017783 | NM_015512         |
| SCZ PGC GWAS | DPYD        | 1806          | dihydropyrimidine dehydrogenase                                                            | 1p22          | GWAS             | -0.42                             | -3.90       | 1.24E-04 | -0.06       | hHC002214 | NM_000110         |
| SCZ PGC GWAS | E124        | 9538          | etoposide induced 2.4 mRNA                                                                 | 11q24         | GWAS             | -0.06                             | -0.99       | 3.25E-01 | -0.13       | hHR016596 | AF010313          |
| SCZ PGC GWAS | FEZ1        | 9638          | fasciculation and elongation protein zeta 1 (zygin I)                                      | 11q24.2       | GWAS             | -0.55                             | -8.40       | 4.06E-15 | 0.13        | hHC021292 | NM_005103         |
| SCZ PGC GWAS | FTSJ2       | 29960         | FtsJ homolog 2 ( <i>E. coli</i> )                                                          | 7p22          | GWAS             | -0.02                             | -0.40       | 6.90E-01 | -0.13       | hHC010873 | NM_013393         |
| SCZ PGC GWAS | GLYCK       | 132158        | glycerate kinase                                                                           | 3p21.1        | GWAS             | -0.32                             | -7.18       | 8.79E-12 | 0.07        | hHC018008 | NM_145262         |
| SCZ PGC GWAS | GNL3        | 26354         | guanine nucleotide binding protein-like 3 (nucleolar)                                      | 3p21.1        | GWAS             | -0.06                             | -0.50       | 6.15E-01 | -0.13       | hHA040707 | NM_206825         |
| SCZ PGC GWAS | ITH3        | 3699          | inter-alpha (globulin) inhibitor H3                                                        | 3p21.2-p21.1  | GWAS             | -0.19                             | -2.38       | 1.79E-02 | -0.10       | hHC025527 | NM_002217         |
| SCZ PGC GWAS | ITH4        | 3700          | inter-alpha (globulin) inhibitor H4 (plasma Kallikrein-sensitive glycoprotein)             | 3p21-p14      | GWAS             | -0.59                             | -9.22       | 1.67E-17 | 0.17        | hHC024955 | NM_002218         |
| SCZ PGC GWAS | MAD1L1      | 8379          | MAD1 mitotic arrest deficient-like 1 (yeast)                                               | 7p22          | GWAS             | -0.67                             | -9.84       | 2.22E-19 | 0.20        | hHR019802 | NM_003550         |
| SCZ PGC GWAS | MUSTN1      | 389125        | musculoskeletal, embryonic nuclear protein 1                                               | 3p21.1        | GWAS             | -2.05                             | -13.74      | 5.32E-32 | 0.37        | hHC019519 | NM_205853         |

Supp Table 1 Gene Sets

| Gene Set     | Gene Symbol | EntrezGene ID | Description                                                                            | Location         | Genetic Evidence | Beta Coefficient ("Fetal Effect") | t-statistic | p-value  | Adjusted R2 | Probe ID  | Ref Seq Accession |
|--------------|-------------|---------------|----------------------------------------------------------------------------------------|------------------|------------------|-----------------------------------|-------------|----------|-------------|-----------|-------------------|
| SCZ PGC GWAS | NDUFA13     | 51079         | NADH dehydrogenase (ubiquinone) 1 alpha subcomplex, 13                                 | 19p13.2          | GWAS             | -0.97                             | -16.93      | 1.12E-42 | 0.49        | hHC021546 | NM_015965         |
| SCZ PGC GWAS | NGEF        | 25791         | neuronal guanine nucleotide exchange factor                                            | 2q37             | GWAS             | -2.54                             | -29.36      | 6.70E-81 | 0.76        | hHC014574 | NM_019850         |
| SCZ PGC GWAS | NISCH       | 11188         | nischarin                                                                              | 3p21.1           | GWAS             | -0.46                             | -6.97       | 3.17E-11 | 0.06        | hHC014499 | NM_007184         |
| SCZ PGC GWAS | OGFOD2      | NA            | 2-oxoglutarate and iron-dependent oxygenase domain containing 2                        | 12q24.31         | GWAS             | -1.17                             | -15.41      | 1.42E-37 | 0.44        | hHC021261 | NM_024623         |
| SCZ PGC GWAS | PITPNM2     | 57605         | phosphatidylinositol transfer protein, membrane-associated 2                           | 12q24.31         | GWAS             | -0.92                             | -16.09      | 7.13E-40 | 0.46        | hHC012429 | NM_020845         |
| SCZ PGC GWAS | PKNOX2      | 63876         | PBX/knotted 1 homeobox 2                                                               | -                | GWAS             | -1.04                             | -15.44      | 1.08E-37 | 0.44        | hHA039708 | NM_022062         |
| SCZ PGC GWAS | PPM1M       | 132160        | protein phosphatase 1M (PP2C domain containing)                                        | 3p21.1           | GWAS             | -0.42                             | -4.50       | 1.07E-05 | -0.04       | hHC011132 | NM_144641         |
| SCZ PGC GWAS | PTPRG       | 5793          | protein tyrosine phosphatase, receptor type, G                                         | 3p21-p14         | GWAS             | -0.55                             | -6.74       | 1.19E-10 | 0.05        | hHC004362 | NM_002841         |
| SCZ PGC GWAS | RILPL2      | 196383        | Rab interacting lysosomal protein-like 2                                               | 12q24.31         | GWAS             | -1.56                             | -19.07      | 9.30E-50 | 0.55        | hHR031019 | NM_145058         |
| SCZ PGC GWAS | SBNO1       | 55206         | strawberry notch homolog 1 (Drosophila)                                                | 12q24.31         | GWAS             | -0.65                             | -7.39       | 2.50E-12 | 0.08        | hHC011312 | AK096864          |
| SCZ PGC GWAS | SEMA3G      | 56920         | sema domain, immunoglobulin domain (Ig), short basic domain, secreted, (semaphorin) 3G | 3p21.1           | GWAS             | -0.92                             | -6.78       | 9.72E-11 | 0.05        | hHC010991 | NM_020163         |
| SCZ PGC GWAS | SLC06A1     | 133482        | solute carrier organic anion transporter family, member 6A1                            | 5q21.1           | GWAS             | -1.09                             | -9.65       | 8.43E-19 | 0.19        | hHC004124 | NM_173488         |
| SCZ PGC GWAS | SNX19       | 399979        | sorting nexin 19                                                                       | 11q25            | GWAS             | -0.25                             | -3.89       | 1.29E-04 | -0.06       | hHR003934 | NM_014758         |
| SCZ PGC GWAS | SPCS1       | 28972         | signal peptidase complex subunit 1 homolog (S. cerevisiae)                             | 3p21.1           | GWAS             | -0.73                             | -12.08      | 1.66E-26 | 0.30        | hHC009782 | NM_014041         |
| SCZ PGC GWAS | SRP54       | 6729          | signal recognition particle 54kDa                                                      | 14q13.2          | GWAS             | -0.47                             | -8.77       | 3.61E-16 | 0.15        | hHC002166 | NM_003136         |
| SCZ PGC GWAS | STAB1       | 23166         | stabilin 1                                                                             | 3p21.1           | GWAS             | -0.06                             | -0.75       | 4.56E-01 | -0.13       | hHC025154 | NM_015136         |
| SCZ PGC GWAS | SF4         | 57794         | splicing factor 4                                                                      | 19p13.11         | GWAS             | -0.24                             | -5.64       | 4.91E-08 | 0.00        | hHC029084 | NM_172231         |
| SCZ PGC GWAS | SULT6B1     | 391365        | sulfotransferase family, cytosolic, 6B, member 1                                       | 2p22.2           | GWAS             | -0.16                             | -1.75       | 8.10E-02 | -0.12       | hHR007924 | NM_001032377      |
| SCZ PGC GWAS | TNNC1       | 7134          | troponin C type 1 (slow)                                                               | 3p21.3-p14.3     | GWAS             | -0.27                             | -3.06       | 2.51E-03 | -0.09       | hHC020672 | NM_003280         |
| SCZ PGC GWAS | LBA1        | 9881          | lupus brain antigen 1                                                                  | 3p22.2           | GWAS             | -0.43                             | -5.23       | 3.65E-07 | -0.01       | hHR016901 | NM_014831         |
| SCZ PGC GWAS | TWF2        | 11344         | twinfilin, actin-binding protein, homolog 2 (Drosophila)                               | 3p21.1           | GWAS             | -0.33                             | -7.41       | 2.26E-12 | 0.08        | hHC020722 | NM_007284         |
| SCZ PGC GWAS | USMG5       | 84833         | up-regulated during skeletal muscle growth 5 homolog (mouse)                           | 10q24.33         | GWAS             | -0.72                             | -1.98       | 4.92E-02 | -0.11       | hHR011410 | NM_032747         |
| SCZ PGC GWAS | YJEFN3      | 374887        | YjeF N-terminal domain containing 3                                                    | 19p13.11         | GWAS             | -1.93                             | -23.55      | 5.18E-64 | 0.66        | hHC026050 | NM_198537         |
| SCZ CNV      | ALDOA       | 226           | aldolase A, fructose-bisphosphate                                                      | 16p11.2          | CNV Association  | 0.32                              | 5.01        | 1.08E-06 | -0.02       | hHA038102 | NM_000034         |
| SCZ CNV      | ARVCF       | 421           | armadillo repeat gene deletions in velocardiofacial syndrome                           | 22q11.21         | CNV Association  | 0.57                              | 10.39       | 4.53E-21 | 0.22        | hHC025769 | NM_001670         |
| SCZ CNV      | ASPHD1      | 253982        | aspartate beta-hydroxylase domain containing 1                                         | 16p11.2          | CNV Association  | 0.74                              | 8.54        | 1.69E-15 | 0.14        | hHC008219 | AF070642          |
| SCZ CNV      | BCL9        | 607           | B-cell CLL/lymphoma 9                                                                  | 1q21             | CNV Association  | 2.02                              | 23.33       | 2.50E-63 | 0.66        | hHC014098 | NM_004326         |
| SCZ CNV      | C22orf29    | 79680         | chromosome 22 open reading frame 29                                                    | 22q11.21         | CNV Association  | 0.07                              | 1.38        | 1.70E-01 | -0.12       | hHC014745 | NM_024627         |
| SCZ CNV      | C16orf53    | 79447         | chromosome 16 open reading frame 53                                                    | 16p11.2          | CNV Association  | 1.29                              | 19.62       | 1.49E-51 | 0.57        | hHC013809 | NM_024516         |
| SCZ CNV      | CDC45L      | 8318          | CDC45 cell division cycle 45-like (S. cerevisiae)                                      | 22q11.21         | CNV Association  | 3.89                              | 25.04       | 1.59E-68 | 0.69        | hHC004040 | NM_003504         |
| SCZ CNV      | CHRNA7      | 1139          | cholinergic receptor, nicotinic, alpha 7                                               | 15q14            | CNV Association  | 0.83                              | 5.64        | 4.76E-08 | 0.00        | hHR025141 | NM_000746         |
| SCZ CNV      | CLTCL1      | 8218          | clathrin, heavy chain-like 1                                                           | 22q11.2 22q11.21 | CNV Association  | 0.90                              | 9.68        | 7.00E-19 | 0.19        | hHA036352 | NM_007098         |
| SCZ CNV      | CRKL        | 1399          | v-crk sarcoma virus CT10 oncogene homolog (avian)-like                                 | 22q11 22q11.21   | CNV Association  | 0.05                              | 0.94        | 3.49E-01 | -0.13       | hHC019229 | NM_005207         |
| SCZ CNV      | CYFIP1      | NA            | cytoplasmic FMR1 interacting protein 1                                                 | 15q11            | CNV Association  | 0.55                              | 4.89        | 1.87E-06 | -0.03       | hHC003582 | AY763579          |
| SCZ CNV      | DGCR10      | 26222         | DiGeorge syndrome critical region gene 10                                              | 22q11            | CNV Association  | 0.56                              | 4.23        | 3.37E-05 | -0.05       | hHR005214 | NR_026651         |
| SCZ CNV      | DGCR11      | 25786         | DiGeorge syndrome critical region gene 11                                              | 22q11.21         | CNV Association  | 0.00                              | 0.03        | 9.72E-01 | -0.13       | hHR014573 | NR_024157         |

Supp Table 1 Gene Sets

| Gene Set | Gene Symbol | EntrezGene ID | Description                                                                          | Location               | Genetic Evidence | Beta Coefficient ("Fetal Effect") | t-statistic | p-value  | Adjusted R2 | Probe ID  | Ref Seq Accession |
|----------|-------------|---------------|--------------------------------------------------------------------------------------|------------------------|------------------|-----------------------------------|-------------|----------|-------------|-----------|-------------------|
| SCZ CNV  | DGCR14      | 8220          | DiGeorge syndrome critical region gene 14                                            |                        | CNV Association  | 0.45                              | 5.40        | 1.60E-07 | -0.01       | hHR013003 | NM_022719         |
| SCZ CNV  | DGCR5       | NA            | DiGeorge syndrome critical region gene 5 (non-protein coding)                        | 22q11                  | CNV Association  | 0.65                              | 7.67        | 4.41E-13 | 0.09        | hHC030047 | X91348            |
| SCZ CNV  | DGCR8       | 54487         | DiGeorge syndrome critical region gene 8                                             | 22q11.2                | CNV Association  | 0.82                              | 6.25        | 1.92E-09 | 0.03        | hHC018376 | NM_022720         |
| SCZ CNV  | DLG1        | 1739          | discs, large homolog 1 (Drosophila)                                                  | 3q29                   | CNV Association  | 0.20                              | 4.14        | 4.92E-05 | -0.05       | hHA038986 | NM_004087         |
| SCZ CNV  | FAM57B      | 83723         | family with sequence similarity 57, member B                                         | 16p11.2                | CNV Association  | 0.88                              | 12.37       | 1.94E-27 | 0.31        | hHC021273 | NM_031478         |
| SCZ CNV  | FBXO45      | 200933        | F-box protein 45                                                                     | 3q29                   | CNV Association  | 0.05                              | 1.09        | 2.77E-01 | -0.13       | hHR012604 | NM_001105573      |
| SCZ CNV  | GDPD3       | 79153         | glycerophosphodiester phosphodiesterase domain containing 3                          | 16p11.2                | CNV Association  | 0.24                              | 4.35        | 2.03E-05 | -0.05       | hHC023507 | NM_024307         |
| SCZ CNV  | GJA5        | 2702          | gap junction protein, alpha 5, 40kDa                                                 | 1q21.1                 | CNV Association  | 0.25                              | 3.02        | 2.82E-03 | -0.09       | hHC014579 | NM_005266         |
| SCZ CNV  | HFE2        | 148738        | hemochromatosis type 2 (juvenile)                                                    | 1q21.1                 | CNV Association  | 0.09                              | 0.70        | 4.82E-01 | -0.13       | hHA039834 | NM_213653         |
| SCZ CNV  | HIC2        | 23119         | hypermethylated in cancer 2                                                          | 22q11.21               | CNV Association  | 2.32                              | 31.79       | 1.95E-87 | 0.79        | hHC029540 | NM_015094         |
| SCZ CNV  | HIRA        | 7290          | HIR histone cell cycle regulation defective homolog A (S. cerevisiae)                | 22q11.2 22q11.21       | CNV Association  | 0.58                              | 11.24       | 9.08E-24 | 0.26        | hHC025127 | NM_003325         |
| SCZ CNV  | HIRIP3      | 8479          | HIRA interacting protein 3                                                           | 16p11.2                | CNV Association  | 0.16                              | 2.28        | 2.33E-02 | -0.11       | hHA038020 | NM_003609         |
| SCZ CNV  | KCTD13      | 253980        | potassium channel tetramerisation domain containing 13                               | 16p11.2                | CNV Association  | 0.16                              | 2.41        | 1.68E-02 | -0.10       | hHC015500 | NM_178863         |
| SCZ CNV  | KIF22       | 3835          | kinesin family member 22                                                             |                        | CNV Association  | 0.22                              | 3.55        | 4.67E-04 | -0.07       | hHC016722 | AK294380          |
| SCZ CNV  | KLHL22      | 84861         | kelch-like 22 (Drosophila)                                                           | 22q11.21               | CNV Association  | 0.38                              | 8.72        | 5.11E-16 | 0.14        | hHC021778 | NM_032775         |
| SCZ CNV  | LIX1L       | 128077        | Lix1 homolog (mouse)-like                                                            | 1q21.1                 | CNV Association  | 1.38                              | 21.92       | 6.15E-59 | 0.63        | hHC005831 | AK128733          |
| SCZ CNV  | LZTR1       | 8216          | leucine-zipper-like transcription regulator 1                                        | 22q11.21 22q11.1-q11.2 | CNV Association  | 0.56                              | 10.82       | 1.98E-22 | 0.24        | hHC019168 | NM_006767         |
| SCZ CNV  | MF12        | 4241          | antigen p97 (melanoma associated) identified by monoclonal antibodies 133.2 and 96.5 | 3q28-q29               | CNV Association  | 0.07                              | 0.92        | 3.59E-01 | -0.13       | hHA038525 | NM_005929         |
| SCZ CNV  | MTMR15      | NA            | myotubularin related protein 15                                                      | 15q13.2-q13.3          | CNV Association  | 0.50                              | 7.52        | 1.10E-12 | 0.09        | hHC010102 | NM_014967         |
| SCZ CNV  | NCBP2       | 22916         | nuclear cap binding protein subunit 2, 20kDa                                         | 3q29                   | CNV Association  | 1.11                              | 21.09       | 2.57E-56 | 0.61        | hHC003863 | NM_007362         |
| SCZ CNV  | NRXN1       | 9378          | neurexin 1                                                                           | 2p16.3                 | CNV Association  | 1.31                              | 14.33       | 6.02E-34 | 0.39        | hHA035283 | NM_001135659      |
| SCZ CNV  | P2RX6       | 9127          | purinergic receptor P2X, ligand-gated ion channel, 6                                 | 22q11.21               | CNV Association  | 0.16                              | 3.13        | 2.00E-03 | -0.09       | hHC022715 | AB002058          |
| SCZ CNV  | PAK2        | 5062          | p21 protein (Cdc42/Rac)-activated kinase 2                                           | 3q29                   | CNV Association  | 1.74                              | 24.02       | 1.95E-65 | 0.67        | hHR008719 | NM_002577         |
| SCZ CNV  | PDZK1       | 5174          | PDZ domain containing 1                                                              | 1q21                   | CNV Association  | 0.23                              | 2.12        | 3.52E-02 | -0.11       | hHR023600 | NM_002614         |
| SCZ CNV  | PI4KA       | 5297          | phosphatidylinositol 4-kinase, catalytic, alpha                                      | 22q11.21               | CNV Association  | 0.50                              | 5.74        | 2.81E-08 | 0.01        | hHA039366 | NM_058004         |
| SCZ CNV  | PIAS3       | NA            | protein inhibitor of activated STAT, 3                                               | 1q21                   | CNV Association  | 0.07                              | 1.46        | 1.46E-01 | -0.12       | hHC008914 | NM_006099         |
| SCZ CNV  | POLR3C      | 10623         | polymerase (RNA) III (DNA directed) polypeptide C (62kD)                             | 1q21.1                 | CNV Association  | 0.19                              | 4.05        | 6.81E-05 | -0.06       | hHC015103 | NM_006468         |
| SCZ CNV  | POLR3GL     | 84265         | polymerase (RNA) III (DNA directed) polypeptide G (32kD) like                        | 1q21.1                 | CNV Association  | 0.05                              | 1.04        | 2.97E-01 | -0.13       | hHC005755 | NM_032305         |
| SCZ CNV  | PPP4C       | 5531          | protein phosphatase 4 (formerly X), catalytic subunit                                | 16p12-p11              | CNV Association  | 1.29                              | 18.99       | 1.69E-49 | 0.55        | hHC019979 | NM_002720         |
| SCZ CNV  | PRKAB2      | 5565          | protein kinase, AMP-activated, beta 2 non-catalytic subunit                          | 1q21.1                 | CNV Association  | 1.39                              | 21.24       | 8.97E-57 | 0.61        | hHC007231 | NM_005399         |
| SCZ CNV  | RANBP1      | 5902          | RAN binding protein 1                                                                | 22q11.21               | CNV Association  | 0.40                              | 8.73        | 4.51E-16 | 0.14        | hHR030426 | NM_002882         |
| SCZ CNV  | RBM8A       | NA            | RNA binding motif protein 8A                                                         | 1q12                   | CNV Association  | 0.90                              | 15.33       | 2.48E-37 | 0.43        | hHR030321 | NM_005105         |
| SCZ CNV  | RNF115      | 27246         | ring finger protein 115                                                              | 1q21.1                 | CNV Association  | 0.08                              | 1.27        | 2.06E-01 | -0.12       | hHC007856 | NM_014455         |
| SCZ CNV  | SERPIND1    | 3053          | serpin peptidase inhibitor, clade D (heparin cofactor), member 1                     | 22q11.2 22q11.21       | CNV Association  | 0.74                              | 6.22        | 2.23E-09 | 0.03        | hHC022493 | NM_000185         |
| SCZ CNV  | SLC25A1     | 6576          | solute carrier family 25 (mitochondrial carrier; citrate transporter), member 1      | 22q11.21               | CNV Association  | 0.48                              | 8.50        | 2.19E-15 | 0.13        | hHC024586 | NM_005984         |
| SCZ CNV  | SPN         | 6693          | sialophorin                                                                          | 16p11.2                | CNV Association  | 0.15                              | 3.40        | 7.88E-04 | -0.08       | hHC020872 | NM_001030288      |



Supp Table 1 Gene Sets

| Gene Set | Gene Symbol | EntrezGene ID | Description                                                                                                                    | Location                 | Genetic Evidence | Beta Coefficient ("Fetal Effect") | t-statistic | p-value  | Adjusted R2 | Probe ID  | Ref Seq Accession |
|----------|-------------|---------------|--------------------------------------------------------------------------------------------------------------------------------|--------------------------|------------------|-----------------------------------|-------------|----------|-------------|-----------|-------------------|
| SCZ CNV  | TAOK2       | 9344          | TAO kinase 2                                                                                                                   | 16p11.2                  | CNV Association  | 0.50                              | 5.08        | 7.67E-07 | -0.02       | hHA036912 | NM_004783         |
| SCZ CNV  | CTEX1D2     | 255758        | Tctex1 domain containing 2                                                                                                     | 3q29                     | CNV Association  | 0.62                              | 8.82        | 2.46E-16 | 0.15        | hHC014256 | NM_152773         |
| SCZ CNV  | TXNIP       | 10628         | thioredoxin interacting protein                                                                                                | 1q21.1                   | CNV Association  | 0.86                              | 6.21        | 2.33E-09 | 0.03        | hHC017503 | NM_006472         |
| SCZ CNV  | UBXN7       | 26043         | UBX domain protein 7                                                                                                           | 3q29                     | CNV Association  | 1.05                              | 15.84       | 4.86E-39 | 0.45        | hHR014260 | NM_015562         |
| SCZ CNV  | UFD1L       | 7353          | ubiquitin fusion degradation 1 like (yeast)                                                                                    | 22q11.21                 | CNV Association  | 0.25                              | 5.15        | 5.60E-07 | -0.02       | hHC030312 | NM_005659         |
| SCZ CNV  | ZNF74       | 7625          | zinc finger protein 74                                                                                                         | 22q11.2 22q11.21         | CNV Association  | 1.57                              | 23.04       | 2.05E-62 | 0.65        | hHC014115 | NM_003426         |
| SCZ CNV  | ANKRD34A    | 284615        | ankyrin repeat domain 34A                                                                                                      | 1q21.1                   | CNV Association  | -0.98                             | -14.04      | 5.24E-33 | 0.38        | hHR014589 | NM_001039888      |
| SCZ CNV  | ANKRD35     | 148741        | ankyrin repeat domain 35                                                                                                       | 1q21.1                   | CNV Association  | -0.61                             | -8.15       | 2.04E-14 | 0.12        | hHC024169 | NM_144698         |
| SCZ CNV  | C16orf54    | 283897        | chromosome 16 open reading frame 54                                                                                            | 16p11.2                  | CNV Association  | -0.01                             | -0.11       | 9.09E-01 | -0.13       | hHC017288 | NM_175900         |
| SCZ CNV  | C22orf25    | 128989        | chromosome 22 open reading frame 25                                                                                            | 22q11.21                 | CNV Association  | -1.47                             | -23.16      | 8.40E-63 | 0.65        | hHC014819 | NM_152906         |
| SCZ CNV  | C3orf34     | 84984         | chromosome 3 open reading frame 34                                                                                             | 3q29                     | CNV Association  | -0.09                             | -1.48       | 1.41E-01 | -0.12       | hHC017467 | NM_032898         |
| SCZ CNV  | CD160       | 11126         | CD160 molecule                                                                                                                 | 1q21.1                   | CNV Association  | -0.49                             | -8.59       | 1.18E-15 | 0.14        | hHC014181 | NM_007053         |
| SCZ CNV  | CDIPT       | 10423         | CDP-diacylglycerol--inositol 3-phosphatidyltransferase (phosphatidylinositol synthase)                                         | 16p11.2                  | CNV Association  | -0.59                             | -13.67      | 9.04E-32 | 0.37        | hHC022124 | NM_006319         |
| SCZ CNV  | CHRFAM7A    | 89832         | CHRNA7 (cholinergic receptor, nicotinic, alpha 7, exons 5-10) and FAM7A (family with sequence similarity 7A, exons A-E) fusion | 15q13.1                  | CNV Association  | -1.54                             | -13.74      | 5.29E-32 | 0.37        | hHR031145 | NM_139320         |
| SCZ CNV  | COMT        | NA            | catechol-O-methyltransferase                                                                                                   | 22q11.21-q11.23 22q11.21 | CNV Association  | -0.28                             | -5.30       | 2.66E-07 | -0.01       | hHA032822 | NM_000754         |
| SCZ CNV  | CORO1A      | 11151         | coronin, actin binding protein, 1A                                                                                             | 16p11.2                  | CNV Association  | -0.97                             | -16.13      | 5.34E-40 | 0.46        | hHC026037 | NM_007074         |
| SCZ CNV  | DGCR2       | 9993          | DiGeorge syndrome critical region gene 2                                                                                       | 22q11.21                 | CNV Association  | -0.73                             | -12.66      | 2.09E-28 | 0.33        | hHR017731 | NM_005137         |
| SCZ CNV  | DGCR6       | 8214          | DiGeorge syndrome critical region gene 6                                                                                       | 22q11.21 22q11           | CNV Association  | -0.73                             | -13.54      | 2.53E-31 | 0.36        | hHC031997 | NM_005675         |
| SCZ CNV  | DGCR6L      | 85359         | DiGeorge syndrome critical region gene 6-like                                                                                  | 22q11                    | CNV Association  | -0.74                             | -13.76      | 4.76E-32 | 0.37        | hHC031931 | NM_033257         |
| SCZ CNV  | DGCR9       | 25787         | DiGeorge syndrome critical region gene 9                                                                                       | 22q11.21                 | CNV Association  | -0.60                             | -6.57       | 3.13E-10 | 0.04        | hHR023893 | NR_024159         |
| SCZ CNV  | DOC2A       | 8448          | double C2-like domains, alpha                                                                                                  | 16p11.2                  | CNV Association  | -0.64                             | -13.19      | 3.67E-30 | 0.35        | hHC026830 | NM_003586         |
| SCZ CNV  | FMOS        | 2330          | flavin containing monooxygenase 5                                                                                              | 1q21.1                   | CNV Association  | -0.74                             | -9.65       | 8.54E-19 | 0.19        | hHC015181 | NM_001461         |
| SCZ CNV  | GJA8        | 2703          | gap junction protein, alpha 8, 50kDa                                                                                           | 1q21.1                   | CNV Association  | -0.49                             | -6.30       | 1.40E-09 | 0.03        | hHR032123 | NM_005267         |
| SCZ CNV  | GNB1L       | 54584         | guanine nucleotide binding protein (G protein), beta polypeptide 1-like                                                        | 22q11.2                  | CNV Association  | -0.25                             | -3.92       | 1.14E-04 | -0.06       | hHC021043 | NM_053004         |
| SCZ CNV  | GNRHR2      | 114814        | gonadotropin-releasing hormone (type 2) receptor 2                                                                             | 1q12                     | CNV Association  | -0.49                             | -5.22       | 3.85E-07 | -0.01       | hHR022874 | NR_002328         |
| SCZ CNV  | INO80E      | NA            | INO80 complex subunit E                                                                                                        | 16p11.2                  | CNV Association  | -0.03                             | -0.68       | 4.98E-01 | -0.13       | hHC019698 | NM_173618         |
| SCZ CNV  | KLF13       | 51621         | Kruppel-like factor 13                                                                                                         | 15q12                    | CNV Association  | -0.53                             | -6.24       | 2.04E-09 | 0.03        | hHC004305 | NM_015995         |
| SCZ CNV  | MAPK3       | 5595          | mitogen-activated protein kinase 3                                                                                             | 16p11.2                  | CNV Association  | -1.22                             | -20.77      | 2.91E-55 | 0.60        | hHC016199 | NM_001040056      |
| SCZ CNV  | MAZ         | 4150          | MYC-associated zinc finger protein (purine-binding transcription factor)                                                       | 16p11.2                  | CNV Association  | -0.06                             | -1.78       | 7.63E-02 | -0.12       | hHC023211 | NM_001042539      |
| SCZ CNV  | MED15       | 51586         | mediator complex subunit 15                                                                                                    | 22q11.2                  | CNV Association  | -0.49                             | -10.55      | 1.36E-21 | 0.23        | hHC027374 | NM_001003891      |
| SCZ CNV  | MRPL40      | 64976         | mitochondrial ribosomal protein L40                                                                                            | 22q11.21                 | CNV Association  | -0.50                             | -7.82       | 1.74E-13 | 0.10        | hHC015360 | NM_003776         |
| SCZ CNV  | MVP         | 9961          | major vault protein                                                                                                            | 16p13.1-p11.2            | CNV Association  | -1.16                             | -12.58      | 3.84E-28 | 0.32        | hHC023971 | NM_017458         |
| SCZ CNV  | NIPA1       | 123606        | non imprinted in Prader-Willi/Angelman syndrome 1                                                                              | 15q11.2                  | CNV Association  | -1.18                             | -13.19      | 3.66E-30 | 0.35        | hHC009691 | NM_144599         |
| SCZ CNV  | NIPA2       | NA            | non imprinted in Prader-Willi/Angelman syndrome 2                                                                              | 15q11.2                  | CNV Association  | -0.03                             | -0.73       | 4.66E-01 | -0.13       | hHC014434 | NM_030922         |
| SCZ CNV  | NUDT17      | 200035        | nudix (nucleoside diphosphate linked moiety X)-type motif 17                                                                   | 1q21.1                   | CNV Association  | -0.30                             | -5.72       | 3.23E-08 | 0.01        | hHC018271 | NM_001012758      |
| SCZ CNV  | OSTalpha    | 200931        | organic solute transporter alpha                                                                                               | 3q29                     | CNV Association  | -0.01                             | -0.07       | 9.47E-01 | -0.13       | hHC018272 | NM_152672         |
| SCZ CNV  | OTUD7A      | 161725        | OTU domain containing 7A                                                                                                       | 15q13.3                  | CNV Association  | -0.96                             | -10.35      | 6.01E-21 | 0.22        | hHC013904 | NM_130901         |

Supp Table 1 Gene Sets

| Gene Set | Gene Symbol | EntrezGene ID | Description                                                                    | Location               | Genetic Evidence | Beta Coefficient ("Fetal Effect") | t-statistic | p-value  | Adjusted R2 | Probe ID  | Ref Seq Accession |
|----------|-------------|---------------|--------------------------------------------------------------------------------|------------------------|------------------|-----------------------------------|-------------|----------|-------------|-----------|-------------------|
| SCZ CNV  | PCYT1A      | 5130          | phosphate cytidyltransferase 1, choline, alpha                                 | 3q29                   | CNV Association  | -0.45                             | -7.23       | 6.50E-12 | 0.07        | hHC012756 | NM_005017         |
| SCZ CNV  | PEX11B      | 8799          | peroxisomal biogenesis factor 11 beta                                          | 1q21.1                 | CNV Association  | -0.70                             | -15.11      | 1.44E-36 | 0.42        | hHC006958 | NM_003846         |
| SCZ CNV  | PIGX        | 54965         | phosphatidylinositol glycan anchor biosynthesis, class X                       | 3q29                   | CNV Association  | -0.40                             | -4.72       | 4.00E-06 | -0.03       | hHC005676 | NM_017861         |
| SCZ CNV  | PIGZ        | 80235         | phosphatidylinositol glycan anchor biosynthesis, class Z                       | 3q29                   | CNV Association  | -1.19                             | -15.29      | 3.41E-37 | 0.43        | hHC014426 | NM_025163         |
| SCZ CNV  | PRODH       | 5625          | proline dehydrogenase (oxidase) 1                                              | 22q11.21               | CNV Association  | -1.01                             | -9.02       | 6.36E-17 | 0.16        | hHR022951 | NM_016335         |
| SCZ CNV  | PRRT2       | 112476        | proline-rich transmembrane protein 2                                           | 16p11.2                | CNV Association  | -0.57                             | -7.73       | 3.02E-13 | 0.10        | hHC012542 | NM_145239         |
| SCZ CNV  | QPRT        | 23475         | quinolinate phosphoribosyltransferase                                          | 16p11.2                | CNV Association  | -0.86                             | -10.74      | 3.41E-22 | 0.24        | hHC023172 | NM_014298         |
| SCZ CNV  | RNF168      | 165918        | ring finger protein 168                                                        | 3q29                   | CNV Association  | -0.13                             | -1.09       | 2.78E-01 | -0.13       | hHC014227 | NM_152617         |
| SCZ CNV  | RTN4R       | 65078         | reticulon 4 receptor                                                           | 22q11.21               | CNV Association  | -0.81                             | -9.38       | 5.47E-18 | 0.18        | hHC015361 | NM_023004         |
| SCZ CNV  | SCARF2      | 91179         | scavenger receptor class F, member 2                                           | 22q11.21               | CNV Association  | -0.17                             | -3.01       | 2.92E-03 | -0.09       | hHC025789 | NM_153334         |
| SCZ CNV  | SENP5       | 205564        | SUMO1/sentrin specific peptidase 5                                             | 3q29                   | CNV Association  | -0.39                             | -5.55       | 7.65E-08 | 0.00        | hHC019256 | NM_152699         |
| SCZ CNV  | SEZ6L2      | 26470         | seizure related 6 homolog (mouse)-like 2                                       | 16p11.2                | CNV Association  | -1.44                             | -16.87      | 1.83E-42 | 0.49        | hHA039718 | NM_201575         |
| SCZ CNV  | SLC7A4      | 6545          | solute carrier family 7 (cationic amino acid transporter, y+ system), member 4 | 22q11.21               | CNV Association  | -0.83                             | -12.06      | 1.97E-26 | 0.30        | hHC023947 | NM_004173         |
| SCZ CNV  | SNAP29      | 9342          | synaptosomal-associated protein, 29kDa                                         | 22q11.21               | CNV Association  | -0.69                             | -9.68       | 6.90E-19 | 0.19        | hHC007354 | NM_004782         |
| SCZ CNV  | TBX1        | 6899          | T-box 1                                                                        | 22q11.21               | CNV Association  | -0.70                             | -11.59      | 6.57E-25 | 0.28        | hHA037074 | NM_080647         |
| SCZ CNV  | TBX6        | 6911          | T-box 6                                                                        | 16p11.2                | CNV Association  | -0.78                             | -9.56       | 1.59E-18 | 0.18        | hHA040492 | NM_004608         |
| SCZ CNV  | TFRC        | 7037          | transferrin receptor (p90, CD71)                                               | 3q29                   | CNV Association  | -0.42                             | -3.88       | 1.33E-04 | -0.06       | hHC006485 | NM_003234         |
| SCZ CNV  | THAP7       | 80764         | THAP domain containing 7                                                       | 22q11.2                | CNV Association  | -0.13                             | -3.41       | 7.74E-04 | -0.08       | hHC021948 | CR605890          |
| SCZ CNV  | TM4SF19     | 116211        | transmembrane 4 L six family member 19                                         | 3q29                   | CNV Association  | -0.04                             | -0.58       | 5.60E-01 | -0.13       | hHC022595 | NM_138461         |
| SCZ CNV  | TMEM219     | 124446        | transmembrane protein 219                                                      | 16p11.2                | CNV Association  | -0.95                             | -18.45      | 1.04E-47 | 0.54        | hHR015749 | NM_001083613      |
| SCZ CNV  | TRMT2A      | 27037         | TRM2 tRNA methyltransferase 2 homolog A (S. cerevisiae)                        | 22q11.1-22q13 22q11.21 | CNV Association  | -0.40                             | -5.92       | 1.14E-08 | 0.01        | hHA038708 | NM_022727         |
| SCZ CNV  | TSSK2       | NA            | testis-specific serine kinase 2                                                | 22q11.21               | CNV Association  | -0.55                             | -5.51       | 9.14E-08 | 0.00        | hHC020559 | NM_053006         |
| SCZ CNV  | TXNRD2      | 10587         | thioredoxin reductase 2                                                        | 22q11.21               | CNV Association  | -0.84                             | -16.35      | 9.34E-41 | 0.47        | hHC023645 | NM_006440         |
| SCZ CNV  | WDR53       | 348793        | WD repeat domain 53                                                            |                        | CNV Association  | -0.40                             | -4.15       | 4.71E-05 | -0.05       | hHR008083 | CA415142          |
| SCZ CNV  | YPEL3       | 83719         | yippee-like 3 (Drosophila)                                                     | 16p11.2                | CNV Association  | -0.95                             | -16.01      | 1.35E-39 | 0.46        | hHC002415 | NM_031477         |
| SCZ CNV  | ZDHHC19     | 131540        | zinc finger, DHHC-type containing 19                                           | 3q29                   | CNV Association  | -1.33                             | -14.96      | 4.47E-36 | 0.42        | hHC023654 | NM_001039617      |
| SCZ CNV  | ZDHHC8      | 29801         | zinc finger, DHHC-type containing 8                                            | 22q11.21               | CNV Association  | -0.16                             | -3.59       | 4.09E-04 | -0.07       | hHC029138 | NM_013373         |
| SCZ SNV  | ALS2CL      | 259173        | ALS2 C-terminal like                                                           | 3p21.31                | Exome sequencing | 0.19                              | 2.31        | 2.20E-02 | -0.11       | hHA036014 | AK126505          |
| SCZ SNV  | ARHGEF10    | 9639          | Rho guanine nucleotide exchange factor (GEF) 10                                | 8p23                   | Exome sequencing | 0.49                              | 4.69        | 4.52E-06 | -0.03       | hHA036494 | NM_014629         |
| SCZ SNV  | ASAP2       | 8853          | ArfGAP with SH3 domain, ankyrin repeat and PH domain 2                         | 2p25 2p24              | Exome sequencing | 0.63                              | 9.89        | 1.61E-19 | 0.20        | hHC002182 | NM_003887         |
| SCZ SNV  | ATP5O       | 539           | ATP synthase, H+ transporting, mitochondrial F1 complex, O subunit             | 21q22.1-q22.2 21q22.11 | Exome sequencing | 0.15                              | 2.72        | 7.10E-03 | -0.10       | hHC028277 | NM_001697         |
| SCZ SNV  | BCORL1      | 63035         | BCL6 co-repressor-like 1                                                       | Xq25-q26.1             | Exome sequencing | 1.15                              | 17.60       | 6.56E-45 | 0.51        | hHC024980 | NM_021946         |
| SCZ SNV  | BIRC6       | 57448         | baculoviral IAP repeat-containing 6                                            | 2p22-p21               | Exome sequencing | 0.56                              | 12.81       | 6.58E-29 | 0.33        | hHC009547 | NM_016252         |
| SCZ SNV  | BRPF1       | 7862          | bromodomain and PHD finger containing, 1                                       | 3p26-p25               | Exome sequencing | 1.03                              | 18.40       | 1.46E-47 | 0.53        | hHC025318 | NM_001003694      |
| SCZ SNV  | BSND        | 7809          | Bartter syndrome, infantile, with sensorineural deafness (Barttin)             | 1p32.1                 | Exome sequencing | 0.02                              | 0.13        | 8.98E-01 | -0.13       | hHC022560 | NM_057176         |
| SCZ SNV  | C11orf30    | 56946         | chromosome 11 open reading frame 30                                            | 11q13.5                | Exome sequencing | 1.24                              | 20.60       | 9.71E-55 | 0.59        | hHC014706 | NM_020193         |
| SCZ SNV  | C12orf72    | NA            | chromosome 12 open reading frame 72                                            | 12p11.21               | Exome sequencing | 0.24                              | 2.73        | 6.72E-03 | -0.10       | hHC006714 | AL832339          |
| SCZ SNV  | CARD6       | 84674         | caspase recruitment domain family, member 6                                    | 5p13.1                 | Exome sequencing | 0.01                              | 0.15        | 8.78E-01 | -0.13       | hHC009976 | NM_032587         |

Supp Table 1 Gene Sets

| Gene Set | Gene Symbol | EntrezGene ID | Description                                                                             | Location         | Genetic Evidence | Beta Coefficient ("Fetal Effect") | t-statistic | p-value  | Adjusted R2 | Probe ID  | Ref Seq Accession |
|----------|-------------|---------------|-----------------------------------------------------------------------------------------|------------------|------------------|-----------------------------------|-------------|----------|-------------|-----------|-------------------|
| SCZ SNV  | CASP4       | 837           | caspase 4, apoptosis-related cysteine peptidase                                         | 11q22.2-q22.3    | Exome sequencing | 0.14                              | 1.91        | 5.76E-02 | -0.11       | hHA040399 | NM_033306         |
| SCZ SNV  | CBX5        | 23468         | chromobox homolog 5 (HP1 alpha homolog, Drosophila)                                     | 12q13.13         | Exome sequencing | 0.78                              | 7.03        | 2.19E-11 | 0.06        | hHC010825 | NM_001127322      |
| SCZ SNV  | CCDC108     | 255101        | coiled-coil domain containing 108                                                       |                  | Exome sequencing | 0.04                              | 0.37        | 7.12E-01 | -0.13       | hHR011130 | NM_152389         |
| SCZ SNV  | CCDC137     | 339230        | coiled-coil domain containing 137                                                       | 17q25.3          | Exome sequencing | 0.14                              | 2.53        | 1.19E-02 | -0.10       | hHC023195 | NM_199287         |
| SCZ SNV  | CCDC84      | 338657        | coiled-coil domain containing 84                                                        | 11q23.3          | Exome sequencing | 0.54                              | 7.87        | 1.24E-13 | 0.10        | hHR016405 | NM_198489         |
| SCZ SNV  | CHD4        | 1108          | chromodomain helicase DNA binding protein 4                                             | 12p13            | Exome sequencing | 0.16                              | 3.65        | 3.22E-04 | -0.07       | hHC022301 | NM_001273         |
| SCZ SNV  | CHEK2       | 11200         | CHK2 checkpoint homolog (S. pombe)                                                      | 22q11.2 22q12.1  | Exome sequencing | 1.02                              | 9.43        | 3.83E-18 | 0.18        | hHA035671 | NM_001005735      |
| SCZ SNV  | CLIC5       | 53405         | chloride intracellular channel 5                                                        | 6p21.1-p12.1     | Exome sequencing | 0.29                              | 3.53        | 4.96E-04 | -0.07       | hHC008730 | NM_001114086      |
| SCZ SNV  | CLTCL1      | 8218          | clathrin, heavy chain-like 1                                                            | 22q11.2 22q11.21 | Exome sequencing | 0.90                              | 9.68        | 7.00E-19 | 0.19        | hHA036352 | NM_007098         |
| SCZ SNV  | COL3A1      | 1281          | collagen, type III, alpha 1                                                             | 2q31             | Exome sequencing | 2.87                              | 12.11       | 1.33E-26 | 0.30        | hHR008145 | NM_000090         |
| SCZ SNV  | COMMD9      | 29099         | COMM domain containing 9                                                                | 11p13            | Exome sequencing | 0.36                              | 5.31        | 2.47E-07 | -0.01       | hHA037644 | NM_014186         |
| SCZ SNV  | CUGBP2      | 10659         | CUG triplet repeat, RNA binding protein 2                                               | 10p13            | Exome sequencing | 1.27                              | 17.75       | 2.14E-45 | 0.51        | hHR003253 | NM_001025077      |
| SCZ SNV  | DAB2IP      | 153090        | DAB2 interacting protein                                                                | 9q33.1-q33.3     | Exome sequencing | 0.10                              | 2.04        | 4.24E-02 | -0.11       | hHC017247 | NM_032552         |
| SCZ SNV  | DNAH6       | 1768          | dynein, axonemal, heavy chain 6                                                         | 2p11.2           | Exome sequencing | 0.26                              | 2.66        | 8.25E-03 | -0.10       | hHC018025 | NM_001370         |
| SCZ SNV  | DNMT1       | 1786          | DNA (cytosine-5)-methyltransferase 1                                                    | 19p13.2          | Exome sequencing | 0.76                              | 11.33       | 4.53E-24 | 0.27        | hHC021326 | NM_001130823      |
| SCZ SNV  | DSCAM       | 1826          | Down syndrome cell adhesion molecule                                                    | 21q22.2          | Exome sequencing | 0.43                              | 6.22        | 2.20E-09 | 0.03        | hHA036004 | NM_001389         |
| SCZ SNV  | DTX1        | 1840          | deltex homolog 1 (Drosophila)                                                           | 12q24.13         | Exome sequencing | 0.40                              | 6.78        | 9.65E-11 | 0.05        | hHC016350 | NM_004416         |
| SCZ SNV  | EDEM2       | 55741         | ER degradation enhancer, mannosidase alpha-like 2                                       | 20q11.22         | Exome sequencing | 0.26                              | 3.75        | 2.24E-04 | -0.07       | hHC019984 | NM_018217         |
| SCZ SNV  | EIF5        | 1983          | eukaryotic translation initiation factor 5                                              | 14q32.32         | Exome sequencing | 0.04                              | 0.58        | 5.66E-01 | -0.13       | hHA039962 | NM_001969         |
| SCZ SNV  | ESAM        | 90952         | endothelial cell adhesion molecule                                                      | 11q24.2          | Exome sequencing | 0.17                              | 2.64        | 8.77E-03 | -0.10       | hHC021286 | NM_138961         |
| SCZ SNV  | EVC2        | 132884        | Ellis van Creveld syndrome 2                                                            | 4p16.2-p16.1     | Exome sequencing | 0.54                              | 5.16        | 5.15E-07 | -0.02       | hHC015130 | NM_147127         |
| SCZ SNV  | FASTKD5     | 60493         | FAST kinase domains 5                                                                   | 20p13            | Exome sequencing | 0.20                              | 2.90        | 4.09E-03 | -0.09       | hHC007631 | NM_021826         |
| SCZ SNV  | FBXL10      | 84678         | F-box and leucine-rich repeat protein 10                                                | 12q24.31         | Exome sequencing | 1.48                              | 28.92       | 1.10E-79 | 0.75        | hHC010330 | NM_032590         |
| SCZ SNV  | FCGBP       | 8857          | Fc fragment of IgG binding protein                                                      | 19q13.1          | Exome sequencing | 0.55                              | 2.84        | 4.96E-03 | -0.09       | hHC015075 | NM_003890         |
| SCZ SNV  | FLAD1       | 80308         | FAD1 flavin adenine dinucleotide synthetase homolog (S. cerevisiae)                     | 1q21.3           | Exome sequencing | 0.98                              | 10.99       | 5.57E-23 | 0.25        | hHA034671 | NM_025207         |
| SCZ SNV  | FLJ20184    | 54848         | hypothetical protein FLJ20184                                                           | 4q24             | Exome sequencing | 0.32                              | 3.90        | 1.25E-04 | -0.06       | hHC022381 | NM_017700         |
| SCZ SNV  | GIF         | 2694          | gastric intrinsic factor (vitamin B synthesis)                                          | 11q13            | Exome sequencing | 0.20                              | 3.55        | 4.67E-04 | -0.07       | hHC011933 | NM_005142         |
| SCZ SNV  | GPR153      | 387509        | G protein-coupled receptor 153                                                          | 1p36.31          | Exome sequencing | 0.48                              | 6.40        | 8.10E-10 | 0.04        | hHC016431 | AL540300          |
| SCZ SNV  | GPRIN3      | 285513        | GPRIN family member 3                                                                   | 4q22.1           | Exome sequencing | 0.41                              | 3.00        | 3.01E-03 | -0.09       | hHR003610 | NM_198281         |
| SCZ SNV  | H2AFV       | 94239         | H2A histone family, member V                                                            | 7p13             | Exome sequencing | 1.35                              | 21.74       | 2.29E-58 | 0.62        | hHA033353 | NM_138635         |
| SCZ SNV  | HIF1A       | 3091          | hypoxia inducible factor 1, alpha subunit (basic helix-loop-helix transcription factor) | 14q21-q24        | Exome sequencing | 1.29                              | 15.00       | 3.31E-36 | 0.42        | hHC020587 | NM_001530         |
| SCZ SNV  | HIST1H1E    | 3008          | histone cluster 1, H1e                                                                  | 6p21.3           | Exome sequencing | 0.84                              | 4.44        | 1.36E-05 | -0.04       | hHR016704 | NM_005321         |
| SCZ SNV  | HIVEP1      | 3096          | human immunodeficiency virus type 1 enhancer binding protein 1                          | 6p24-p22.3       | Exome sequencing | 0.31                              | 4.78        | 3.10E-06 | -0.03       | hHC002239 | NM_002114         |
| SCZ SNV  | HMGR        | 3156          | 3-hydroxy-3-methylglutaryl-Coenzyme A reductase                                         | 5q13.3-q14       | Exome sequencing | 1.63                              | 8.74        | 4.31E-16 | 0.14        | hCT001342 | NM_000859         |
| SCZ SNV  | HTR7        | 3363          | 5-hydroxytryptamine (serotonin) receptor 7 (adenylate cyclase-coupled)                  | 10q21-q24        | Exome sequencing | 0.12                              | 1.22        | 2.23E-01 | -0.12       | hHA036763 | NM_019859         |
| SCZ SNV  | IFT140      | 9742          | intraflagellar transport 140 homolog (Chlamydomonas)                                    | 16p13.3          | Exome sequencing | 0.38                              | 5.67        | 4.19E-08 | 0.00        | hHC022443 | NM_014714         |
| SCZ SNV  | IFT81       | 28981         | intraflagellar transport 81 homolog (Chlamydomonas)                                     | 12q24.13         | Exome sequencing | 1.83                              | 27.21       | 7.41E-75 | 0.73        | hHA034159 | NM_014055         |

Supp Table 1 Gene Sets

| Gene Set | Gene Symbol | EntrezGene ID | Description                                                                | Location      | Genetic Evidence | Beta Coefficient ("Fetal Effect") | t-statistic | p-value  | Adjusted R2 | Probe ID  | Ref Seq Accession |
|----------|-------------|---------------|----------------------------------------------------------------------------|---------------|------------------|-----------------------------------|-------------|----------|-------------|-----------|-------------------|
| SCZ SNV  | INTS10      | 55174         | integrator complex subunit 10                                              | 8p21.3        | Exome sequencing | 0.31                              | 5.15        | 5.35E-07 | -0.02       | hHC009516 | NM_018142         |
| SCZ SNV  | IRS1        | 3667          | insulin receptor substrate 1                                               | 2q36          | Exome sequencing | 1.43                              | 21.24       | 8.91E-57 | 0.61        | hHC002137 | NM_005544         |
| SCZ SNV  | KIAA0195    | 9772          | KIAA0195                                                                   | 17q25.1       | Exome sequencing | 0.08                              | 1.34        | 1.81E-01 | -0.12       | hHC025255 | NM_014738         |
| SCZ SNV  | KLF12       | 11278         | Kruppel-like factor 12                                                     | 13q22         | Exome sequencing | 1.10                              | 18.14       | 1.05E-46 | 0.53        | hHR006221 | NM_007249         |
| SCZ SNV  | KLK13       | 26085         | kallikrein-related peptidase 13                                            | 19q13.3-q13.4 | Exome sequencing | 0.06                              | 1.11        | 2.69E-01 | -0.12       | hHC015195 | NM_015596         |
| SCZ SNV  | KPNA1       | 3836          | karyopherin alpha 1 (importin alpha 5)                                     | 3q21          | Exome sequencing | 0.98                              | 15.00       | 3.37E-36 | 0.42        | hHE041382 | NM_002264         |
| SCZ SNV  | KRT4        | 3851          | keratin 4                                                                  | 12q12-q13     | Exome sequencing | 0.35                              | 6.77        | 1.03E-10 | 0.05        | hHC022916 | NM_002272         |
| SCZ SNV  | LAMA1       | 284217        | laminin, alpha 1                                                           | 18p11.31      | Exome sequencing | 2.02                              | 14.87       | 9.22E-36 | 0.41        | hHC007864 | NM_005559         |
| SCZ SNV  | LARP7       | 51574         | La ribonucleoprotein domain family, member 7                               | 4q25          | Exome sequencing | 0.26                              | 4.36        | 1.97E-05 | -0.05       | hHC020835 | NM_016648         |
| SCZ SNV  | LRIT2       | 340745        | leucine-rich repeat, immunoglobulin-like and transmembrane domains 2       | 10q23.1       | Exome sequencing | 0.33                              | 4.05        | 7.04E-05 | -0.06       | hHR005602 | NM_001017924      |
| SCZ SNV  | LRP1        | 4035          | low density lipoprotein-related protein 1 (alpha-2-macroglobulin receptor) | 12q13-q14     | Exome sequencing | 1.73                              | 12.32       | 2.68E-27 | 0.31        | hCT000695 | NM_002332         |
| SCZ SNV  | MACF1       | 23499         | microtubule-actin crosslinking factor 1                                    | 1p32-p31      | Exome sequencing | 1.99                              | 22.61       | 4.19E-61 | 0.64        | hHA035413 | NM_012090         |
| SCZ SNV  | MBTPS1      | 8720          | membrane-bound transcription factor peptidase, site 1                      | 16 16q24      | Exome sequencing | 0.59                              | 10.10       | 3.47E-20 | 0.21        | hHA035034 | NM_003791         |
| SCZ SNV  | MIOS        | 54468         | missing oocyte, meiosis regulator, homolog (Drosophila)                    | 7p22-p21      | Exome sequencing | 0.76                              | 7.15        | 1.07E-11 | 0.07        | hHC004314 | AL136892          |
| SCZ SNV  | MKI67       | 4288          | antigen identified by monoclonal antibody Ki-67                            | 10q25-qter    | Exome sequencing | 2.68                              | 22.97       | 3.37E-62 | 0.65        | hHC010551 | NM_002417         |
| SCZ SNV  | MUC5B       | 727897        | mucin 5B, oligomeric mucus/gel-forming                                     |               | Exome sequencing | 0.43                              | 4.23        | 3.34E-05 | -0.05       | hHR017878 | NM_002458         |
| SCZ SNV  | MYH10       | 4628          | myosin, heavy chain 10, non-muscle                                         | 17p13         | Exome sequencing | 0.02                              | 0.30        | 7.61E-01 | -0.13       | hHC015906 | NM_005964         |
| SCZ SNV  | MYH9        | 4627          | myosin, heavy chain 9, non-muscle                                          | 22q13.1       | Exome sequencing | 0.05                              | 1.26        | 2.08E-01 | -0.12       | hHC023712 | NM_002473         |
| SCZ SNV  | N4BP2L2     | 10443         | NEDD4 binding protein 2-like 2                                             | 13q13.1       | Exome sequencing | 0.90                              | 11.98       | 3.68E-26 | 0.30        | hHC016908 | NM_014887         |
| SCZ SNV  | NCAN        | 1463          | neurocan                                                                   | 19p12         | Exome sequencing | 1.30                              | 15.11       | 1.36E-36 | 0.42        | hHC008161 | NM_004386         |
| SCZ SNV  | NFE2L3      | 9603          | nuclear factor (erythroid-derived 2)-like 3                                | 7p15-p14      | Exome sequencing | 1.12                              | 7.54        | 9.84E-13 | 0.09        | hHC028656 | BC056142          |
| SCZ SNV  | NRIP1       | 8204          | nuclear receptor interacting protein 1                                     | 21q11.2       | Exome sequencing | 0.01                              | 0.09        | 9.31E-01 | -0.13       | hHC003199 | NM_003489         |
| SCZ SNV  | NUP214      | 8021          | nucleoporin 214kDa                                                         | 9q34.1        | Exome sequencing | 0.59                              | 11.37       | 3.45E-24 | 0.27        | hHC009957 | BC105998          |
| SCZ SNV  | NUP54       | 53371         | nucleoporin 54kDa                                                          | 4q21.1        | Exome sequencing | 1.19                              | 15.99       | 1.56E-39 | 0.46        | hHC012766 | NM_017426         |
| SCZ SNV  | ODZ1        | 10178         | odz, odd Oz/ten-m homolog 1(Drosophila)                                    | Xq25          | Exome sequencing | 0.58                              | 6.49        | 4.88E-10 | 0.04        | hHC006993 | NM_014253         |
| SCZ SNV  | PAG1        | 55824         | phosphoprotein associated with glycosphingolipid microdomains 1            | 8q21.13       | Exome sequencing | 1.10                              | 14.63       | 5.72E-35 | 0.41        | hHC010986 | NM_018440         |
| SCZ SNV  | PAPPA2      | 60676         | pappalysin 2                                                               | 1q23-q25      | Exome sequencing | 0.39                              | 4.40        | 1.66E-05 | -0.05       | hHA039447 | NM_020318         |
| SCZ SNV  | PHF23       | 79142         | PHD finger protein 23                                                      | 17p13.1       | Exome sequencing | 0.21                              | 4.30        | 2.48E-05 | -0.05       | hHC011748 | NM_024297         |
| SCZ SNV  | PLCL2       | 23228         | phospholipase C-like 2                                                     | 3p24.3        | Exome sequencing | 0.10                              | 0.82        | 4.14E-01 | -0.13       | hHC011901 | NM_015184         |
| SCZ SNV  | PLK3        | 1263          | polo-like kinase 3 (Drosophila)                                            | 1p34.1        | Exome sequencing | 0.98                              | 12.31       | 2.89E-27 | 0.31        | hHC014816 | NM_004073         |
| SCZ SNV  | PML         | 5371          | promyelocytic leukemia                                                     | 15q22         | Exome sequencing | 0.14                              | 2.75        | 6.46E-03 | -0.10       | hHA038029 | NM_033238         |
| SCZ SNV  | PPP1R14D    | 54866         | protein phosphatase 1, regulatory (inhibitor) subunit 14D                  | 15q15.1       | Exome sequencing | 0.08                              | 0.91        | 3.64E-01 | -0.13       | hHC018153 | NM_001130143      |
| SCZ SNV  | PSG1        | 5669          | pregnancy specific beta-1-glycoprotein 1                                   | 19q13.2       | Exome sequencing | 0.54                              | 5.71        | 3.37E-08 | 0.01        | hHC031110 | NM_006905         |
| SCZ SNV  | RAD54L2     | 23132         | RAD54-like 2 (S. cerevisiae)                                               | 3p21.2        | Exome sequencing | 0.68                              | 7.02        | 2.35E-11 | 0.06        | hHC024061 | NM_015106         |
| SCZ SNV  | RBBP5       | 5929          | retinoblastoma binding protein 5                                           | 1q32          | Exome sequencing | 0.00                              | 0.04        | 9.68E-01 | -0.13       | hHC015649 | NM_005057         |
| SCZ SNV  | RECK        | 8434          | reversion-inducing-cysteine-rich protein with kazal motifs                 | 9p13.3        | Exome sequencing | 0.20                              | 2.50        | 1.32E-02 | -0.10       | hHC004414 | NM_021111         |
| SCZ SNV  | RFX3        | 5991          | regulatory factor X, 3 (influences HLA class II expression)                | 9p24.2        | Exome sequencing | 1.11                              | 8.63        | 8.85E-16 | 0.14        | hHC006894 | NM_134428         |
| SCZ SNV  | RGS12       | 6002          | regulator of G-protein signaling 12                                        | 4p16.3        | Exome sequencing | 0.85                              | 9.13        | 3.04E-17 | 0.16        | hHA034713 | BC118594          |

Supp Table 1 Gene Sets

| Gene Set | Gene Symbol | EntrezGene ID | Description                                                                     | Location          | Genetic Evidence | Beta Coefficient ("Fetal Effect") | t-statistic | p-value  | Adjusted R2 | Probe ID  | Ref Seq Accession |
|----------|-------------|---------------|---------------------------------------------------------------------------------|-------------------|------------------|-----------------------------------|-------------|----------|-------------|-----------|-------------------|
| SCZ SNV  | RRP1B       | 23076         | ribosomal RNA processing 1 homolog B ( <i>S. cerevisiae</i> )                   | 21q22.3           | Exome sequencing | 1.19                              | 17.71       | 2.71E-45 | 0.51        | hHR002221 | NM_015056         |
| SCZ SNV  | RUNX3       | 864           | runt-related transcription factor 3                                             | 1p36              | Exome sequencing | 0.01                              | 0.13        | 8.94E-01 | -0.13       | hHC017470 | NM_001031680      |
| SCZ SNV  | SAP30BP     | 29115         | SAP30 binding protein                                                           | 17q25.1           | Exome sequencing | 0.25                              | 4.86        | 2.12E-06 | -0.03       | hHC011964 | NM_013260         |
| SCZ SNV  | SEC24B      | 10427         | SEC24 family, member B ( <i>S. cerevisiae</i> )                                 | 4q25              | Exome sequencing | 0.88                              | 17.58       | 7.46E-45 | 0.51        | hHC003807 | NM_006323         |
| SCZ SNV  | SLC19A2     | 10560         | solute carrier family 19 (thiamine transporter), member 2                       | 1q23.3            | Exome sequencing | 1.31                              | 14.10       | 3.36E-33 | 0.39        | hHC006606 | NM_006996         |
| SCZ SNV  | SLC25A1     | 6576          | solute carrier family 25 (mitochondrial carrier; citrate transporter), member 1 | 22q11.21          | Exome sequencing | 0.48                              | 8.50        | 2.19E-15 | 0.13        | hHC024586 | NM_005984         |
| SCZ SNV  | SLC26A8     | 116369        | solute carrier family 26, member 8                                              | 6p21              | Exome sequencing | 0.21                              | 4.33        | 2.16E-05 | -0.05       | hHA036600 | NM_052961         |
| SCZ SNV  | SLC38A2     | 54407         | solute carrier family 38, member 2                                              | 12q               | Exome sequencing | 0.50                              | 7.27        | 5.30E-12 | 0.08        | hHC001832 | NM_018976         |
| SCZ SNV  | SMCHD1      | 23347         | structural maintenance of chromosomes flexible hinge domain containing 1        | 18p11.32          | Exome sequencing | 1.20                              | 15.02       | 2.83E-36 | 0.42        | hHR002326 | NM_015295         |
| SCZ SNV  | SPATA22     | 84690         | spermatogenesis associated 22                                                   | 17p13.3           | Exome sequencing | 0.39                              | 2.48        | 1.38E-02 | -0.10       | hHC011058 | AK295299          |
| SCZ SNV  | SPATA5      | 166378        | spermatogenesis associated 5                                                    |                   | Exome sequencing | 2.46                              | 15.74       | 1.10E-38 | 0.45        | hHE041009 | NM_145207         |
| SCZ SNV  | SPIB        | 6689          | Spi-B transcription factor (Spi-1/PU.1 related)                                 | 19q13.3-q13.4     | Exome sequencing | 0.28                              | 3.28        | 1.21E-03 | -0.08       | hHC018407 | NM_003121         |
| SCZ SNV  | ST3GAL6     | 10402         | ST3 beta-galactoside alpha-2,3-sialyltransferase 6                              | 3q12.1            | Exome sequencing | 0.53                              | 5.50        | 9.89E-08 | 0.00        | hHC012897 | AK001922          |
| SCZ SNV  | STAG1       | 10274         | stromal antigen 1                                                               | 3q22.3            | Exome sequencing | 1.79                              | 24.09       | 1.19E-65 | 0.67        | hHA037017 | NM_005862         |
| SCZ SNV  | TBC1D14     | NA            | TBC1 domain family, member 14                                                   | 4p16.1            | Exome sequencing | 1.47                              | 24.56       | 4.43E-67 | 0.68        | hHC006885 | NM_020773         |
| SCZ SNV  | THBS1       | 7057          | thrombospondin 1                                                                | 15q15             | Exome sequencing | 2.94                              | 13.79       | 3.63E-32 | 0.37        | hHC004021 | NM_003246         |
| SCZ SNV  | TLK2        | 11011         | tousled-like kinase 2                                                           | 17q23             | Exome sequencing | 0.66                              | 11.43       | 2.13E-24 | 0.27        | hHC030724 | NM_006852         |
| SCZ SNV  | TRAK1       | 22906         | trafficking protein, kinesin binding 1                                          | 3p25.3-p24.1      | Exome sequencing | 0.61                              | 4.79        | 2.94E-06 | -0.03       | hHR003862 | NM_014965         |
| SCZ SNV  | TUB         | NA            | tubby homolog (mouse)                                                           | 11p15.5           | Exome sequencing | 0.39                              | 5.47        | 1.15E-07 | 0.00        | hHA038335 | NM_003320         |
| SCZ SNV  | TUSC4       | 10641         | tumor suppressor candidate 4                                                    | 3p21.3            | Exome sequencing | 0.20                              | 5.47        | 1.16E-07 | 0.00        | hHC022724 | NM_006545         |
| SCZ SNV  | UBQLN1      | 29979         | ubiquilin 1                                                                     | 9q22 9q21.2-q21.3 | Exome sequencing | 0.40                              | 6.31        | 1.39E-09 | 0.03        | hHA035472 | NM_013438         |
| SCZ SNV  | UBR5        | NA            | ubiquitin protein ligase E3 component n-recogin 5                               | 8q22              | Exome sequencing | 1.53                              | 15.90       | 3.02E-39 | 0.45        | hHC001627 | CDS11402          |
| SCZ SNV  | UGT1A3      | 54659         | UDP glucuronosyltransferase 1 family, polypeptide A3                            | 2q37              | Exome sequencing | 0.43                              | 4.92        | 1.61E-06 | -0.03       | hHC008744 | NM_019093         |
| SCZ SNV  | URB2        | 9816          | URB2 ribosome biogenesis 2 homolog ( <i>S. cerevisiae</i> )                     | 1q42.13           | Exome sequencing | 0.58                              | 6.65        | 2.04E-10 | 0.05        | hHC005092 | NM_014777         |
| SCZ SNV  | XPR1        | 9213          | xenotropic and polytropic retrovirus receptor                                   | 1q25.1            | Exome sequencing | 2.29                              | 20.67       | 5.70E-55 | 0.60        | hHR006568 | NM_004736         |
| SCZ SNV  | YLPM1       | 56252         | YLP motif containing 1                                                          | 14q24.3           | Exome sequencing | 0.87                              | 18.24       | 4.98E-47 | 0.53        | hHC011709 | NM_019589         |
| SCZ SNV  | ZBTB40      | 9923          | zinc finger and BTB domain containing 40                                        |                   | Exome sequencing | 1.16                              | 19.24       | 2.58E-50 | 0.56        | hHE042021 | NM_001083621      |
| SCZ SNV  | ZNF14       | 7561          | zinc finger protein 14                                                          | 19p13.3-p13.2     | Exome sequencing | 0.97                              | 18.12       | 1.23E-46 | 0.53        | hHC019150 | NM_021030         |
| SCZ SNV  | ZNF229      | 7772          | zinc finger protein 229                                                         | 19q13.31          | Exome sequencing | 0.74                              | 6.66        | 1.92E-10 | 0.05        | hHC016846 | NM_014518         |
| SCZ SNV  | ZNF530      | 348327        | zinc finger protein 530                                                         | 19q13.43          | Exome sequencing | 0.87                              | 9.69        | 6.44E-19 | 0.19        | hHC015238 | NM_020880         |
| SCZ SNV  | ABCG4       | 64137         | ATP-binding cassette, sub-family G (WHITE), member 4                            | 11q23.3           | Exome sequencing | -0.77                             | -10.80      | 2.33E-22 | 0.24        | hHC019774 | NM_022169         |
| SCZ SNV  | ADAMTS17    | 170691        | ADAM metalloproteinase with thrombospondin type 1 motif, 17                     | 15q24             | Exome sequencing | -0.95                             | -11.14      | 1.84E-23 | 0.26        | hHE041152 | NM_139057         |
| SCZ SNV  | ADAMTS3     | 9508          | ADAM metalloproteinase with thrombospondin type 1 motif, 3                      | 4q13.3            | Exome sequencing | -0.14                             | -0.96       | 3.36E-01 | -0.13       | hHC006183 | NM_014243         |
| SCZ SNV  | ADCY7       | 113           | adenylate cyclase 7                                                             | 16q12-q13         | Exome sequencing | -1.01                             | -8.74       | 4.39E-16 | 0.14        | hHC003521 | NM_001114         |
| SCZ SNV  | ADCY9       | 115           | adenylate cyclase 9                                                             | 16p13.3           | Exome sequencing | -0.12                             | -1.68       | 9.35E-02 | -0.12       | hHC016923 | NM_001116         |
| SCZ SNV  | AHNAK2      | 113146        | AHNAK nucleoprotein 2                                                           | 14q32.33          | Exome sequencing | -1.16                             | -13.65      | 1.08E-31 | 0.37        | hHR010378 | NM_138420         |
| SCZ SNV  | ANO9        | 338440        | anoctamin 9                                                                     | 11p15.5           | Exome sequencing | -0.06                             | -0.78       | 4.35E-01 | -0.13       | hHC024276 | NM_001012302      |

Supp Table 1 Gene Sets

| Gene Set | Gene Symbol | EntrezGene ID | Description                                                                             | Location       | Genetic Evidence | Beta Coefficient ("Fetal Effect") | t-statistic | p-value  | Adjusted R2 | Probe ID  | Ref Seq Accession |
|----------|-------------|---------------|-----------------------------------------------------------------------------------------|----------------|------------------|-----------------------------------|-------------|----------|-------------|-----------|-------------------|
| SCZ SNV  | AP2A2       | 161           | adaptor-related protein complex 2, alpha 2 subunit                                      | 11p15.5        | Exome sequencing | -0.52                             | -8.78       | 3.27E-16 | 0.15        | hHC018021 | NM_012305         |
| SCZ SNV  | BLNK        | 29760         | B-cell linker                                                                           | 10q23.2-q23.33 | Exome sequencing | -1.82                             | -9.29       | 1.01E-17 | 0.17        | hHC005937 | NM_013314         |
| SCZ SNV  | C16orf62    | 57020         | chromosome 16 open reading frame 62                                                     | 16p12.3        | Exome sequencing | -0.73                             | -12.39      | 1.58E-27 | 0.31        | hHC017915 | NM_020314         |
| SCZ SNV  | C18orf1     | 753           | chromosome 18 open reading frame 1                                                      | 18p11.2        | Exome sequencing | -0.04                             | -0.41       | 6.79E-01 | -0.13       | hHC001974 | NM_001003674      |
| SCZ SNV  | C1orf185    | 284546        | chromosome 1 open reading frame 185                                                     | 1p32.3         | Exome sequencing | -0.27                             | -4.21       | 3.68E-05 | -0.05       | hHR007866 | NM_001136508      |
| SCZ SNV  | CACNA1I     | 8911          | calcium channel, voltage-dependent, T type, alpha 1I subunit                            | 22q13.1        | Exome sequencing | -0.98                             | -10.96      | 6.96E-23 | 0.25        | hHC014460 | NM_021096         |
| SCZ SNV  | CAMK4       | 814           | calcium/calmodulin-dependent protein kinase IV                                          | 5q21.3         | Exome sequencing | -0.10                             | -1.00       | 3.20E-01 | -0.13       | hHC017173 | NM_001744         |
| SCZ SNV  | CANX        | 821           | calnexin                                                                                | 5q35           | Exome sequencing | -0.15                             | -2.77       | 6.11E-03 | -0.10       | hHC012844 | NM_001746         |
| SCZ SNV  | CCDC39      | 339829        | coiled-coil domain containing 39                                                        | 3q26.33        | Exome sequencing | -1.66                             | -12.16      | 9.03E-27 | 0.30        | hHR003101 | NM_181426         |
| SCZ SNV  | CELSR2      | 1952          | cadherin, EGF LAG seven-pass G-type receptor 2 (flamingo homolog, Drosophila)           | 1p21           | Exome sequencing | -0.26                             | -4.17       | 4.21E-05 | -0.05       | hHC005875 | NM_001408         |
| SCZ SNV  | CIT         | 11113         | citron (rho-interacting, serine/threonine kinase 21)                                    | 12q24          | Exome sequencing | -2.55                             | -32.81      | 4.26E-90 | 0.80        | hHR004773 | NM_007174         |
| SCZ SNV  | COG1        | NA            | component of oligomeric golgi complex 1                                                 | 17q25.1        | Exome sequencing | -0.81                             | -11.80      | 1.40E-25 | 0.29        | hHC015718 | NM_018714         |
| SCZ SNV  | CRYBG3      | NA            | beta-gamma crystallin domain containing 3                                               | 3q11.2         | Exome sequencing | -0.52                             | -6.45       | 6.25E-10 | 0.04        | hHR008147 | NM_153605         |
| SCZ SNV  | CSPG4       | 1464          | chondroitin sulfate proteoglycan 4                                                      | 15q24.2        | Exome sequencing | -1.19                             | -10.74      | 3.43E-22 | 0.24        | hHC015470 | NM_001897         |
| SCZ SNV  | CYTH1       | 9267          | cytohesin 1                                                                             | 17q25          | Exome sequencing | -0.22                             | -2.99       | 3.05E-03 | -0.09       | hHC005431 | NM_004762         |
| SCZ SNV  | DCDC5       | 196296        | doublecortin domain containing 5                                                        | 11p14.1-p13    | Exome sequencing | -0.15                             | -1.89       | 5.97E-02 | -0.11       | hHC016351 | AK128035          |
| SCZ SNV  | DDHD2       | 23259         | DDHD domain containing 2                                                                | 8p12           | Exome sequencing | -0.37                             | -7.28       | 4.87E-12 | 0.08        | hHC019481 | NM_015214         |
| SCZ SNV  | DDX10       | 1662          | DEAD (Asp-Glu-Ala-Asp) box polypeptide 10                                               | 11q22-q23      | Exome sequencing | -0.30                             | -5.60       | 5.78E-08 | 0.00        | hHC028052 | NM_004398         |
| SCZ SNV  | DGCR2       | 9993          | DiGeorge syndrome critical region gene 2                                                | 22q11.21       | Exome sequencing | -0.73                             | -12.66      | 2.09E-28 | 0.33        | hHR017731 | NM_005137         |
| SCZ SNV  | DHX8        | 1659          | DEAH (Asp-Glu-Ala-His) box polypeptide 8                                                | 17q21.31       | Exome sequencing | -0.06                             | -1.07       | 2.84E-01 | -0.13       | hHC025611 | NM_004941         |
| SCZ SNV  | DOCK1       | 1793          | dedicator of cytokinesis 1                                                              | 10q26.13-q26.3 | Exome sequencing | -1.36                             | -14.12      | 2.98E-33 | 0.39        | hHC001930 | NM_001380         |
| SCZ SNV  | DPYD        | 1806          | dihydropyrimidine dehydrogenase                                                         | 1p22           | Exome sequencing | -0.42                             | -3.90       | 1.24E-04 | -0.06       | hHC002214 | NM_000110         |
| SCZ SNV  | EMR3        | 84658         | egf-like module containing, mucin-like, hormone receptor-like 3                         | 19p13.1        | Exome sequencing | -0.36                             | -3.27       | 1.25E-03 | -0.08       | hHC010684 | NM_032571         |
| SCZ SNV  | FAM13C      | NA            | family with sequence similarity 13, member C                                            | 10q21.1        | Exome sequencing | -0.98                             | -10.74      | 3.57E-22 | 0.24        | hHC001933 | NM_198215         |
| SCZ SNV  | FBXO7       | 25793         | F-box protein 7                                                                         | 22q12-q13      | Exome sequencing | -0.84                             | -13.39      | 8.06E-31 | 0.36        | hHC012997 | NM_012179         |
| SCZ SNV  | FILIP1      | 27145         | filamin A interacting protein 1                                                         | 6q14.1         | Exome sequencing | -1.46                             | -11.06      | 3.26E-23 | 0.25        | hHC011197 | NM_015687         |
| SCZ SNV  | FRY         | 10129         | furry homolog (Drosophila)                                                              | 13q13.1        | Exome sequencing | -0.55                             | -9.11       | 3.53E-17 | 0.16        | hHC002191 | NM_023037         |
| SCZ SNV  | GLPR1L2     | 144321        | GLI pathogenesis-related 1 like 2                                                       | 12q21.1-q21.2  | Exome sequencing | -0.18                             | -1.05       | 2.93E-01 | -0.13       | hHC007031 | BX640916          |
| SCZ SNV  | GLS         | 2744          | glutaminase                                                                             | 2q32-q34       | Exome sequencing | -2.19                             | -24.02      | 1.90E-65 | 0.67        | hHR007488 | AF327434          |
| SCZ SNV  | GNAO1       | 2775          | guanine nucleotide binding protein (G protein), alpha activating activity polypeptide O | 16q13          | Exome sequencing | -0.68                             | -9.57       | 1.48E-18 | 0.18        | hHA035036 | NM_020988         |
| SCZ SNV  | GPR115      | 221393        | G protein-coupled receptor 115                                                          | 6p12.3         | Exome sequencing | -0.38                             | -4.27       | 2.87E-05 | -0.05       | hHC013926 | NM_153838         |
| SCZ SNV  | HECTD1      | 25831         | HECT domain containing 1                                                                | 14q12          | Exome sequencing | -0.20                             | -4.46       | 1.28E-05 | -0.04       | hHC027015 | NM_015382         |
| SCZ SNV  | HLA-C       | 3107          | major histocompatibility complex, class I, C                                            | 6p21.3         | Exome sequencing | -0.88                             | -6.18       | 2.71E-09 | 0.03        | hHC025166 | NM_002117         |
| SCZ SNV  | INPP5A      | 3632          | inositol polyphosphate-5-phosphatase, 40kDa                                             | 10q26.3        | Exome sequencing | -1.02                             | -12.49      | 7.51E-28 | 0.32        | hHC004252 | NM_005539         |
| SCZ SNV  | INTS1       | 26173         | integrator complex subunit 1                                                            | 7p22.3         | Exome sequencing | -0.34                             | -4.70       | 4.51E-06 | -0.03       | hHR017811 | NM_001080453      |
| SCZ SNV  | ITGA3       | 3675          | integrin, alpha 3 (antigen CD49C, alpha 3 subunit of VLA-3 receptor)                    | 17q21.33       | Exome sequencing | -0.24                             | -4.40       | 1.63E-05 | -0.05       | hHC024280 | NM_002204         |
| SCZ SNV  | ITGA6       | 3655          | integrin, alpha 6                                                                       | 2q31.1         | Exome sequencing | -0.30                             | -3.27       | 1.23E-03 | -0.08       | hHC001949 | NM_000210         |
| SCZ SNV  | KCNJ12      | 3768          | potassium inwardly-rectifying channel, subfamily J, member 12                           |                | Exome sequencing | -2.94                             | -26.49      | 8.72E-73 | 0.71        | hHR007348 | NM_021012         |

Supp Table 1 Gene Sets

| Gene Set | Gene Symbol | EntrezGene ID | Description                                                               | Location      | Genetic Evidence | Beta Coefficient ("Fetal Effect") | t-statistic | p-value  | Adjusted R2 | Probe ID  | Ref Seq Accession |
|----------|-------------|---------------|---------------------------------------------------------------------------|---------------|------------------|-----------------------------------|-------------|----------|-------------|-----------|-------------------|
| SCZ SNV  | KIAA1109    | 84162         | KIAA1109                                                                  | 4q27          | Exome sequencing | -0.12                             | -1.94       | 5.31E-02 | -0.11       | hHC013197 | NM_015312         |
| SCZ SNV  | LAMA2       | 3908          | laminin, alpha 2                                                          | 6q22-q23      | Exome sequencing | -0.78                             | -7.68       | 4.06E-13 | 0.09        | hHC020800 | NM_000426         |
| SCZ SNV  | LRI1        | 26103         | leucine-rich repeat, immunoglobulin-like and transmembrane domains 1      | 10q23         | Exome sequencing | -0.13                             | -1.87       | 6.30E-02 | -0.11       | hHC016679 | NM_015613         |
| SCZ SNV  | NAPRT1      | 93100         | nicotinate phosphoribosyltransferase domain containing 1                  | 8q24.3        | Exome sequencing | -0.31                             | -3.47       | 6.22E-04 | -0.08       | hHC025201 | NM_145201         |
| SCZ SNV  | NCOR2       | 9612          | nuclear receptor co-repressor 2                                           | 12q24         | Exome sequencing | -0.67                             | -9.64       | 9.03E-19 | 0.19        | hHR003503 | NM_006312         |
| SCZ SNV  | NEB         | 4703          | nebulin                                                                   | 2q22          | Exome sequencing | -0.81                             | -8.35       | 5.82E-15 | 0.13        | hHC002922 | AK021567          |
| SCZ SNV  | NLRC5       | 84166         | NLR family, CARD domain containing 5                                      | 16q13         | Exome sequencing | -0.86                             | -7.06       | 1.82E-11 | 0.07        | hHC011400 | NM_032206         |
| SCZ SNV  | OPA3        | 80207         | optic atrophy 3 (autosomal recessive, with chorea and spastic paraplegia) |               | Exome sequencing | -1.26                             | -15.03      | 2.63E-36 | 0.42        | hHR026693 | NM_001017989      |
| SCZ SNV  | OR4C46      | 119749        | olfactory receptor, family 4, subfamily C, member 46                      | 11p11.12      | Exome sequencing | -0.07                             | -1.75       | 8.09E-02 | -0.12       | hHR030660 | NM_001004703      |
| SCZ SNV  | P2RY2       | 5029          | purinergic receptor P2Y, G-protein coupled, 2                             | 11q13.5-q14.1 | Exome sequencing | -0.15                             | -1.79       | 7.42E-02 | -0.12       | hHC015910 | NM_176072         |
| SCZ SNV  | PDE4DIP     | 9659          | phosphodiesterase 4D interacting protein                                  | 1q12          | Exome sequencing | -1.60                             | -9.28       | 1.11E-17 | 0.17        | hHC018232 | NM_014644         |
| SCZ SNV  | PIK3CB      | 5291          | phosphoinositide-3-kinase, catalytic, beta polypeptide                    | 3q22.3        | Exome sequencing | -0.58                             | -10.79      | 2.43E-22 | 0.24        | hHC022373 | NM_006219         |
| SCZ SNV  | PITPNM1     | 9600          | phosphatidylinositol transfer protein, membrane-associated 1              | 11q13         | Exome sequencing | -0.48                             | -9.08       | 4.43E-17 | 0.16        | hHC019426 | NM_004910         |
| SCZ SNV  | PLA2G12B    | 84647         | phospholipase A2, group XIIB                                              | 10q22.1       | Exome sequencing | -1.77                             | -16.19      | 3.37E-40 | 0.46        | hHC008856 | NM_032562         |
| SCZ SNV  | PRDX6       | 9588          | peroxiredoxin 6                                                           | 1q25.1        | Exome sequencing | -0.89                             | -12.81      | 6.80E-29 | 0.33        | hHC030001 | NM_004905         |
| SCZ SNV  | PRKCB       | 5579          | protein kinase C, beta                                                    | 16p11.2       | Exome sequencing | -3.02                             | -29.72      | 6.74E-82 | 0.76        | hHC021733 | NM_002738         |
| SCZ SNV  | PTPRM       | 5797          | protein tyrosine phosphatase, receptor type, M                            | 18p11.2       | Exome sequencing | -0.54                             | -8.81       | 2.75E-16 | 0.15        | hHC015648 | NM_001105244      |
| SCZ SNV  | RARG        | 5916          | retinoic acid receptor, gamma                                             | 12q13         | Exome sequencing | -1.09                             | -10.48      | 2.29E-21 | 0.23        | hHC019998 | NM_000966         |
| SCZ SNV  | RASGRP1     | 10125         | RAS guanyl releasing protein 1 (calcium and DAG-regulated)                | 15q14         | Exome sequencing | -2.03                             | -17.98      | 3.59E-46 | 0.52        | hHC002998 | NM_005739         |
| SCZ SNV  | RB1CC1      | 9821          | RB1-inducible coiled-coil 1                                               | 8q11          | Exome sequencing | -0.43                             | -4.36       | 1.92E-05 | -0.05       | hHC006191 | NM_014781         |
| SCZ SNV  | RPH3A       | 22895         | rabphilin 3A homolog (mouse)                                              | 12q24.13      | Exome sequencing | -2.22                             | -16.33      | 1.11E-40 | 0.47        | hHR012249 | NM_014954         |
| SCZ SNV  | SBNO1       | 55206         | strawberry notch homolog 1 (Drosophila)                                   | 12q24.31      | Exome sequencing | -0.65                             | -7.39       | 2.50E-12 | 0.08        | hHC011312 | AK096864          |
| SCZ SNV  | SDF4        | 51150         | stromal cell derived factor 4                                             | 1p36.33       | Exome sequencing | -0.11                             | -1.22       | 2.23E-01 | -0.12       | hHA040703 | NM_016547         |
| SCZ SNV  | SERPINI1    | 5274          | serpin peptidase inhibitor, clade I (neuroserpin), member 1               | 3q26.1        | Exome sequencing | -2.48                             | -22.05      | 2.46E-59 | 0.63        | hHC002254 | NM_005025         |
| SCZ SNV  | SETD1A      | 9739          | SET domain containing 1A                                                  | 16p11.2       | Exome sequencing | -0.33                             | -7.76       | 2.52E-13 | 0.10        | hHC024151 | NM_014712         |
| SCZ SNV  | SLC17A1     | 6568          | solute carrier family 17 (sodium phosphate), member 1                     | 6p23-p21.3    | Exome sequencing | -0.24                             | -4.34       | 2.08E-05 | -0.05       | hHC005716 | NM_005074         |
| SCZ SNV  | SLC18A2     | 6571          | solute carrier family 18 (vesicular monoamine), member 2                  | 10q25         | Exome sequencing | -0.02                             | -0.12       | 9.01E-01 | -0.13       | hHC006479 | BC030593          |
| SCZ SNV  | SLC4A8      | 9498          | solute carrier family 4, sodium bicarbonate cotransporter, member 8       |               | Exome sequencing | -0.35                             | -4.70       | 4.49E-06 | -0.03       | hHC003605 | NM_001039960      |
| SCZ SNV  | SLIT2       | 9353          | slit homolog 2 (Drosophila)                                               | 4p15.2        | Exome sequencing | -0.76                             | -7.97       | 6.89E-14 | 0.11        | hHC003227 | NM_004787         |
| SCZ SNV  | SLIT3       | 6586          | slit homolog 3 (Drosophila)                                               | 5q35          | Exome sequencing | -1.32                             | -11.99      | 3.37E-26 | 0.30        | hHC020243 | NM_003062         |
| SCZ SNV  | SMAP2       | 64744         | small ArfGAP2                                                             | 1p35.3-p34.1  | Exome sequencing | -1.31                             | -17.08      | 3.47E-43 | 0.49        | hHC011020 | NM_022733         |
| SCZ SNV  | SPTLC2      | 9517          | serine palmitoyltransferase, long chain base subunit 2                    | 14q24.3-q31   | Exome sequencing | -0.40                             | -4.20       | 3.73E-05 | -0.05       | hHC006581 | NM_004863         |
| SCZ SNV  | SSBP3       | 23648         | single stranded DNA binding protein 3                                     | 1p32.3        | Exome sequencing | -0.62                             | -10.77      | 2.73E-22 | 0.24        | hHC021338 | NM_001009955      |
| SCZ SNV  | SSFA2       | 6744          | sperm specific antigen 2                                                  | 2q31.3        | Exome sequencing | -0.87                             | -12.24      | 5.04E-27 | 0.31        | hHC004019 | NM_001130445      |
| SCZ SNV  | STAC2       | 342667        | SH3 and cysteine rich domain 2                                            | 17q12         | Exome sequencing | -1.01                             | -15.50      | 6.72E-38 | 0.44        | hHC021697 | NM_198993         |
| SCZ SNV  | STAP2       | 55620         | signal transducing adaptor family member 2                                | 19p13.3       | Exome sequencing | -1.07                             | -12.85      | 4.83E-29 | 0.33        | hHC023097 | NM_017720         |

Supp Table 1 Gene Sets

| Gene Set | Gene Symbol | EntrezGene ID | Description                                                                          | Location                 | Genetic Evidence | Beta Coefficient ("Fetal Effect") | t-statistic | p-value  | Adjusted R2 | Probe ID  | Ref Seq Accession |
|----------|-------------|---------------|--------------------------------------------------------------------------------------|--------------------------|------------------|-----------------------------------|-------------|----------|-------------|-----------|-------------------|
| SCZ SNV  | SYNGAP1     | 8831          | synaptic Ras GTPase activating protein 1 homolog (rat)                               | 6p21.3                   | Exome sequencing | -0.05                             | -0.57       | 5.67E-01 | -0.13       | hHC014146 | NM_006772         |
| SCZ SNV  | SYNM        | 23336         | synemin, intermediate filament protein                                               | 15q26.3                  | Exome sequencing | -2.31                             | -27.00      | 2.99E-74 | 0.72        | hHC005198 | NM_145728         |
| SCZ SNV  | TAF7L       | 54457         | TAF7-like RNA polymerase II, TATA box binding protein (TBP)-associated factor, 50kDa | Xq22.1                   | Exome sequencing | -0.46                             | -4.47       | 1.23E-05 | -0.04       | hHC015924 | NM_024885         |
| SCZ SNV  | TEKT5       | 146279        | tektin 5                                                                             | 16p13.13                 | Exome sequencing | -0.08                             | -0.82       | 4.12E-01 | -0.13       | hHC012570 | NM_144674         |
| SCZ SNV  | TEP1        | 7011          | telomerase-associated protein 1                                                      | 14q11.2                  | Exome sequencing | -0.18                             | -1.80       | 7.30E-02 | -0.12       | hHC015032 | NM_007110         |
| SCZ SNV  | TGM6        | 343641        | transglutaminase 6                                                                   | 20p13                    | Exome sequencing | -0.27                             | -3.91       | 1.21E-04 | -0.06       | hHC022191 | NM_198994         |
| SCZ SNV  | TOP3B       | 8940          | topoisomerase (DNA) III beta                                                         | 22q11.22                 | Exome sequencing | -0.40                             | -9.52       | 2.09E-18 | 0.18        | hHR022284 | NM_003935         |
| SCZ SNV  | TOR1AIP1    | 26092         | torsin A interacting protein 1                                                       | 1q24.2                   | Exome sequencing | -0.89                             | -17.47      | 1.84E-44 | 0.51        | hHR003335 | NM_015602         |
| SCZ SNV  | TREM2       | 54209         | triggering receptor expressed on myeloid cells 2                                     | 6p21.1                   | Exome sequencing | -1.62                             | -7.35       | 3.20E-12 | 0.08        | hHC011302 | NM_018965         |
| SCZ SNV  | UNC13C      | 440279        | unc-13 homolog C (C. elegans)                                                        | 15q21.3                  | Exome sequencing | -2.56                             | -22.49      | 9.84E-61 | 0.64        | hHC003835 | NM_001080534      |
| SCZ SNV  | UPF2        | 26019         | UPF2 regulator of nonsense transcripts homolog (yeast)                               | 10p14-p13                | Exome sequencing | -0.18                             | -3.73       | 2.37E-04 | -0.07       | hHC015194 | NM_080599         |
| SCZ SNV  | VN1R4       | 317703        | vomeronal 1 receptor 4                                                               | 19q13.41                 | Exome sequencing | -0.61                             | -5.81       | 2.02E-08 | 0.01        | hHR029809 | NM_173857         |
| SCZ SNV  | VPS11       | 55823         | vacuolar protein sorting 11 homolog (S. cerevisiae)                                  | 11q23                    | Exome sequencing | -0.76                             | -15.28      | 3.80E-37 | 0.43        | hHC013758 | NM_021729         |
| SCZ SNV  | VPS35       | 55737         | vacuolar protein sorting 35 homolog (S. cerevisiae)                                  | 16q12                    | Exome sequencing | -0.77                             | -13.16      | 4.65E-30 | 0.35        | hHC011701 | NM_018206         |
| SCZ SNV  | ZDHHC23     | 254887        | zinc finger, DHHC-type containing 23                                                 | 3q13.31                  | Exome sequencing | -2.11                             | -19.15      | 5.04E-50 | 0.56        | hHC011184 | NM_173570         |
| ASD CNV  | SEPT5       | 5413          | septin 5                                                                             | 22q11.21-q11.23 22q11.21 | CNV Association  | 0.11                              | 1.38        | 1.69E-01 | -0.12       | hHC020572 | NM_002688         |
| ASD CNV  | ABHD11      | 83451         | abhydrolase domain containing 11                                                     | 7q11.23                  | CNV Association  | 0.04                              | 0.47        | 6.41E-01 | -0.13       | hHA039837 | NR_026912         |
| ASD CNV  | ADM2        | 79924         | adrenomedullin 2                                                                     | 22q13.33                 | CNV Association  | 0.43                              | 9.65        | 8.34E-19 | 0.19        | hHR024334 | NM_024866         |
| ASD CNV  | ALDOA       | 226           | aldolase A, fructose-bisphosphate                                                    | 16p11.2                  | CNV Association  | 0.32                              | 5.01        | 1.08E-06 | -0.02       | hHA038102 | NM_000034         |
| ASD CNV  | ARIH1       | 25820         | ariadne homolog, ubiquitin-conjugating enzyme E2 binding protein, 1 (Drosophila)     | 15q24                    | CNV Association  | 0.42                              | 9.17        | 2.29E-17 | 0.17        | hHR011923 | NM_005744         |
| ASD CNV  | ARVCF       | 421           | armadillo repeat gene deletes in velocardiofacial syndrome                           | 22q11.21                 | CNV Association  | 0.57                              | 10.39       | 4.53E-21 | 0.22        | hHC025769 | NM_001670         |
| ASD CNV  | ASPHD1      | 253982        | aspartate beta-hydroxylase domain containing 1                                       | 16p11.2                  | CNV Association  | 0.74                              | 8.54        | 1.69E-15 | 0.14        | hHC008219 | AF070642          |
| ASD CNV  | BAZ1B       | 9031          | bromodomain adjacent to zinc finger domain, 1B                                       | 7q11.23                  | CNV Association  | 0.15                              | 2.61        | 9.52E-03 | -0.10       | hHC018905 | NM_032408         |
| ASD CNV  | BBS4        | 585           | Bardet-Biedl syndrome 4                                                              | 15q22.3-q23              | CNV Association  | 0.02                              | 0.21        | 8.32E-01 | -0.13       | hHC015344 | NM_033028         |
| ASD CNV  | BCL7B       | 9275          | B-cell CLL/lymphoma 7B                                                               | 7q11.23                  | CNV Association  | 0.21                              | 3.15        | 1.84E-03 | -0.09       | hHC028591 | NM_001707         |
| ASD CNV  | BCL9        | 607           | B-cell CLL/lymphoma 9                                                                | 1q21                     | CNV Association  | 2.02                              | 23.33       | 2.50E-63 | 0.66        | hHC014098 | NM_004326         |
| ASD CNV  | C16orf53    | 79447         | chromosome 16 open reading frame 53                                                  | 16p11.2                  | CNV Association  | 1.29                              | 19.62       | 1.49E-51 | 0.57        | hHC013809 | NM_024516         |
| ASD CNV  | C20orf11    | 54994         | chromosome 20 open reading frame 11                                                  | 20q13.33                 | CNV Association  | 1.01                              | 15.76       | 9.57E-39 | 0.45        | hHC017116 | NM_017896         |
| ASD CNV  | C22orf29    | 79680         | chromosome 22 open reading frame 29                                                  | 22q11.21                 | CNV Association  | 0.07                              | 1.38        | 1.70E-01 | -0.12       | hHC014745 | NM_024627         |
| ASD CNV  | CBWD1       | 55871         | COBW domain containing 1                                                             | 9p24.3                   | CNV Association  | 0.52                              | 7.79        | 2.04E-13 | 0.10        | hHC030237 | NM_018491         |
| ASD CNV  | CD276       | 80381         | CD276 molecule                                                                       | 15q23-q24                | CNV Association  | 0.17                              | 2.71        | 7.30E-03 | -0.10       | hHR022696 | NM_001024736      |
| ASD CNV  | CDC45L      | 8318          | CDC45 cell division cycle 45-like (S. cerevisiae)                                    | 22q11.21                 | CNV Association  | 3.89                              | 25.04       | 1.59E-68 | 0.69        | hHC004040 | NM_003504         |
| ASD CNV  | CHKB        | 1120          | choline kinase beta                                                                  | 22q13.33                 | CNV Association  | 0.60                              | 9.55        | 1.66E-18 | 0.18        | hHA040201 | NM_005198         |
| ASD CNV  | CHRNA7      | 1139          | cholinergic receptor, nicotinic, alpha 7                                             | 15q14                    | CNV Association  | 0.83                              | 5.64        | 4.76E-08 | 0.00        | hHR025141 | NM_000746         |
| ASD CNV  | CLDN4       | 1364          | claudin 4                                                                            | 7q11.23                  | CNV Association  | 0.02                              | 0.14        | 8.86E-01 | -0.13       | hHC022740 | NM_001305         |
| ASD CNV  | CLIP2       | 7461          | CAP-GLY domain containing linker protein 2                                           | 7q11.23                  | CNV Association  | 0.18                              | 2.69        | 7.63E-03 | -0.10       | hHC008431 | NM_003388         |
| ASD CNV  | CLTCL1      | 8218          | clathrin, heavy chain-like 1                                                         | 22q11.2 22q11.21         | CNV Association  | 0.90                              | 9.68        | 7.00E-19 | 0.19        | hHA036352 | NM_007098         |
| ASD CNV  | CPT1B       | 1375          | carnitine palmitoyltransferase 1B (muscle)                                           | 22q13.33                 | CNV Association  | 0.76                              | 11.87       | 8.01E-26 | 0.29        | hHA034492 | NM_152247         |



Supp Table 1 Gene Sets

| Gene Set | Gene Symbol | EntrezGene ID | Description                                                                                                                   | Location               | Genetic Evidence | Beta Coefficient ("Fetal Effect") | t-statistic | p-value  | Adjusted R2 | Probe ID  | Ref Seq Accession |
|----------|-------------|---------------|-------------------------------------------------------------------------------------------------------------------------------|------------------------|------------------|-----------------------------------|-------------|----------|-------------|-----------|-------------------|
| ASD CNV  | CRKL        | 1399          | v-crk sarcoma virus CT10 oncogene homolog (avian)-like cleavage stimulation factor, 3' pre-RNA, subunit 2, 64kDa, tau variant | 22q11 22q11.21         | CNV Association  | 0.05                              | 0.94        | 3.49E-01 | -0.13       | hHC019229 | NM_005207         |
| ASD CNV  | CSTF2T      | 23283         |                                                                                                                               | 10q11                  | CNV Association  | 0.39                              | 4.97        | 1.29E-06 | -0.02       | hHC003317 | NM_015235         |
| ASD CNV  | DGCR10      | 26222         | DiGeorge syndrome critical region gene 10                                                                                     | 22q11                  | CNV Association  | 0.56                              | 4.23        | 3.37E-05 | -0.05       | hHR005214 | NR_026651         |
| ASD CNV  | DGCR11      | 25786         | DiGeorge syndrome critical region gene 11                                                                                     | 22q11.21               | CNV Association  | 0.00                              | 0.03        | 9.72E-01 | -0.13       | hHR014573 | NR_024157         |
| ASD CNV  | DGCR14      | 8220          | DiGeorge syndrome critical region gene 14                                                                                     |                        | CNV Association  | 0.45                              | 5.40        | 1.60E-07 | -0.01       | hHR013003 | NM_022719         |
| ASD CNV  | DGCR5       | NA            | DiGeorge syndrome critical region gene 5 (non-protein coding)                                                                 | 22q11                  | CNV Association  | 0.65                              | 7.67        | 4.41E-13 | 0.09        | hHC030047 | X91348            |
| ASD CNV  | DGCR8       | 54487         | DiGeorge syndrome critical region gene 8                                                                                      | 22q11.2                | CNV Association  | 0.82                              | 6.25        | 1.92E-09 | 0.03        | hHC018376 | NM_022720         |
| ASD CNV  | DIDO1       | 11083         | death inducer-obliterator 1                                                                                                   |                        | CNV Association  | 1.04                              | 8.76        | 3.80E-16 | 0.15        | hHC005414 | NM_033081         |
| ASD CNV  | DKK1        | 22943         | dickkopf homolog 1 (Xenopus laevis)                                                                                           | 10q11.2                | CNV Association  | 0.01                              | 0.11        | 9.12E-01 | -0.13       | hHC011527 | NM_012242         |
| ASD CNV  | DNAJC30     | 84277         | DnaJ (Hsp40) homolog, subfamily C, member 30                                                                                  | 7q11.23                | CNV Association  | 0.20                              | 3.51        | 5.41E-04 | -0.07       | hHR012485 | NM_032317         |
| ASD CNV  | DOCK4       | 9732          | dedicator of cytokinesis 4                                                                                                    | 7q31.1                 | CNV Association  | 0.12                              | 1.39        | 1.67E-01 | -0.12       | hHC005442 | NM_014705         |
| ASD CNV  | FAM57B      | 83723         | family with sequence similarity 57, member B                                                                                  | 16p11.2                | CNV Association  | 0.88                              | 12.37       | 1.94E-27 | 0.31        | hHC021273 | NM_031478         |
| ASD CNV  | FOXD4L1     | 200350        | forkhead box D4-like 1                                                                                                        | 2q14.1                 | CNV Association  | 0.03                              | 0.40        | 6.90E-01 | -0.13       | hHC030644 | NM_012184         |
| ASD CNV  | FRMD4B      | 23150         | FERM domain containing 4B                                                                                                     | 3p14.1                 | CNV Association  | 1.78                              | 14.47       | 1.97E-34 | 0.40        | hHC004841 | NM_015123         |
| ASD CNV  | GABRB3      | 2562          | gamma-aminobutyric acid (GABA) A receptor, beta 3 glycerophosphodiester phosphodiesterase domain containing 3                 | 15q11.2-q12            | CNV Association  | 0.21                              | 2.36        | 1.90E-02 | -0.10       | hHA040248 | NM_021912         |
| ASD CNV  | GDPD3       | 79153         |                                                                                                                               | 16p11.2                | CNV Association  | 0.24                              | 4.35        | 2.03E-05 | -0.05       | hHC023507 | NM_024307         |
| ASD CNV  | GJA5        | 2702          | gap junction protein, alpha 5, 40kDa                                                                                          | 1q21.1                 | CNV Association  | 0.25                              | 3.02        | 2.82E-03 | -0.09       | hHC014579 | NM_005266         |
| ASD CNV  | GTF2IRD1    | 9569          | GTF2I repeat domain containing 1                                                                                              | 7q11.23                | CNV Association  | 1.68                              | 25.04       | 1.64E-68 | 0.69        | hHC005789 | NM_016328         |
| ASD CNV  | HCN4        | 10021         | hyperpolarization activated cyclic nucleotide-gated potassium channel 4                                                       | 15q24-q25              | CNV Association  | 0.39                              | 8.56        | 1.40E-15 | 0.14        | hHC024348 | NM_005477         |
| ASD CNV  | HIRA        | 7290          | HIR histone cell cycle regulation defective homolog A (S. cerevisiae)                                                         | 22q11.2 22q11.21       | CNV Association  | 0.58                              | 11.24       | 9.08E-24 | 0.26        | hHC025127 | NM_003325         |
| ASD CNV  | HIRIP3      | 8479          | HIRA interacting protein 3                                                                                                    | 16p11.2                | CNV Association  | 0.16                              | 2.28        | 2.33E-02 | -0.11       | hHA038020 | NM_003609         |
| ASD CNV  | KCTD13      | 253980        | potassium channel tetramerisation domain containing 13                                                                        | 16p11.2                | CNV Association  | 0.16                              | 2.41        | 1.68E-02 | -0.10       | hHC015500 | NM_178863         |
| ASD CNV  | KIF22       | 3835          | kinesin family member 22                                                                                                      |                        | CNV Association  | 0.22                              | 3.55        | 4.67E-04 | -0.07       | hHC016722 | AK294380          |
| ASD CNV  | KLHL22      | 84861         | kelch-like 22 (Drosophila)                                                                                                    | 22q11.21               | CNV Association  | 0.38                              | 8.72        | 5.11E-16 | 0.14        | hHC021778 | NM_032775         |
| ASD CNV  | LZTR1       | 8216          | leucine-zipper-like transcription regulator 1                                                                                 | 22q11.21 22q11.1-q11.2 | CNV Association  | 0.56                              | 10.82       | 1.98E-22 | 0.24        | hHC019168 | NM_006767         |
| ASD CNV  | MAGI1       | 9223          | membrane associated guanylate kinase, WW and PDZ domain containing 1                                                          | 3p14.1                 | CNV Association  | 0.12                              | 1.76        | 7.93E-02 | -0.12       | hHC022435 | NM_015520         |
| ASD CNV  | MBL2        | 4153          | mannose-binding lectin (protein C) 2, soluble (opsonic defect)                                                                | 10q11.2-q21            | CNV Association  | 0.23                              | 2.28        | 2.37E-02 | -0.11       | hHC003939 | NM_000242         |
| ASD CNV  | MBTPS1      | 8720          | membrane-bound transcription factor peptidase, site 1                                                                         | 16 16q24               | CNV Association  | 0.59                              | 10.10       | 3.47E-20 | 0.21        | hHA035034 | NM_003791         |
| ASD CNV  | MITF        | 4286          | microphthalmia-associated transcription factor                                                                                | 3p14.2-p14.1           | CNV Association  | 0.17                              | 2.09        | 3.79E-02 | -0.11       | hHA037127 | NM_006722         |
| ASD CNV  | MKRN3       | 7681          | makorin ring finger protein 3                                                                                                 | 15q11-q13              | CNV Association  | 1.26                              | 9.75        | 4.09E-19 | 0.19        | hHC006923 | NM_005664         |
| ASD CNV  | MTMR15      | NA            | myotubularin related protein 15                                                                                               | 15q13.2-q13.3          | CNV Association  | 0.50                              | 7.52        | 1.10E-12 | 0.09        | hHC010102 | NM_014967         |
| ASD CNV  | MYO9A       | 4649          | myosin IXA                                                                                                                    | 15q22-q23              | CNV Association  | 0.82                              | 9.84        | 2.25E-19 | 0.20        | hHC010565 | NM_006901         |
| ASD CNV  | NBPF10      | 100132406     | neuroblastoma breakpoint family, member 10                                                                                    |                        | CNV Association  | 1.62                              | 22.13       | 1.36E-59 | 0.63        | hHR030655 | AF419616          |
| ASD CNV  | NCAPH2      | 29781         | non-SMC condensin II complex, subunit H2                                                                                      | 22q13.33               | CNV Association  | 0.20                              | 3.14        | 1.88E-03 | -0.09       | hHA039435 | NM_152299         |
| ASD CNV  | NEO1        | 4756          | neogenin homolog 1 (chicken)                                                                                                  | 15q22.3-q23            | CNV Association  | 1.35                              | 15.02       | 2.86E-36 | 0.42        | hHC014671 | NM_002499         |
| ASD CNV  | NR2E3       | 10002         | nuclear receptor subfamily 2, group E, member 3                                                                               | 15q22.32               | CNV Association  | 0.04                              | 0.32        | 7.47E-01 | -0.13       | hHA034458 | NM_014249         |
| ASD CNV  | NRXN1       | 9378          | neurexin 1                                                                                                                    | 2p16.3                 | CNV Association  | 1.31                              | 14.33       | 6.02E-34 | 0.39        | hHA035283 | NM_001135659      |

Supp Table 1 Gene Sets

| Gene Set | Gene Symbol | EntrezGene ID | Description                                                                     | Location         | Genetic Evidence | Beta Coefficient ("Fetal Effect") | t-statistic | p-value  | Adjusted R2 | Probe ID  | Ref Seq Accession |
|----------|-------------|---------------|---------------------------------------------------------------------------------|------------------|------------------|-----------------------------------|-------------|----------|-------------|-----------|-------------------|
| ASD CNV  | OSGIN1      | 29948         | oxidative stress induced growth inhibitor 1                                     | 16q23.3          | CNV Association  | 0.10                              | 1.90        | 5.83E-02 | -0.11       | hHA040418 | NM_013370         |
| ASD CNV  | P2RX6       | 9127          | purinergic receptor P2X, ligand-gated ion channel, 6                            | 22q11.21         | CNV Association  | 0.16                              | 3.13        | 2.00E-03 | -0.09       | hHC022715 | AB002058          |
| ASD CNV  | PAR4        | 347745        | Prader-Willi/Angelman region gene 4                                             | 15q11.2          | CNV Association  | 0.05                              | 0.81        | 4.20E-01 | -0.13       | hHR028566 | NR_022010         |
| ASD CNV  | PAR5        | 8123          | Prader-Willi/Angelman syndrome-5                                                | 15q11-q13        | CNV Association  | 0.69                              | 5.76        | 2.60E-08 | 0.01        | hHR005044 | NR_022008         |
| ASD CNV  | PARP6       | 56965         | poly (ADP-ribose) polymerase family, member 6                                   | 15q23            | CNV Association  | 0.69                              | 12.73       | 1.21E-28 | 0.33        | hHA036630 | NM_020214         |
| ASD CNV  | PAR-SN      | 347746        | paternally expressed transcript PAR-SN                                          |                  | CNV Association  | 0.67                              | 6.57        | 3.21E-10 | 0.04        | hHO047740 | NR_022011         |
| ASD CNV  | PI4KA       | 5297          | phosphatidylinositol 4-kinase, catalytic, alpha                                 | 22q11.21         | CNV Association  | 0.50                              | 5.74        | 2.81E-08 | 0.01        | hHA039366 | NM_058004         |
| ASD CNV  | PKM2        | 5315          | pyruvate kinase, muscle                                                         | 15q22            | CNV Association  | 0.05                              | 0.61        | 5.41E-01 | -0.13       | hHA033204 | NM_002654         |
| ASD CNV  | PPP4C       | 5531          | protein phosphatase 4 (formerly X), catalytic subunit                           | 16p12-p11        | CNV Association  | 1.29                              | 18.99       | 1.69E-49 | 0.55        | hHC019979 | NM_002720         |
| ASD CNV  | PRKAB2      | 5565          | protein kinase, AMP-activated, beta 2 non-catalytic subunit                     | 1q21.1           | CNV Association  | 1.39                              | 21.24       | 8.97E-57 | 0.61        | hHC007231 | NM_005399         |
| ASD CNV  | PSMD9       | 5715          | proteasome (prosome, macropain) 26S subunit, non-ATPase, 9                      | 12q24.31-q24.32  | CNV Association  | 0.18                              | 2.56        | 1.09E-02 | -0.10       | hHC002728 | NM_002813         |
| ASD CNV  | RANBP1      | 5902          | RAN binding protein 1                                                           | 22q11.21         | CNV Association  | 0.40                              | 8.73        | 4.51E-16 | 0.14        | hHR030426 | NM_002882         |
| ASD CNV  | RFC2        | 5982          | replication factor C (activator 1) 2, 40kDa                                     | 7q11.23          | CNV Association  | 0.83                              | 15.90       | 3.10E-39 | 0.45        | hHC021061 | NM_181471         |
| ASD CNV  | SERPIND1    | 3053          | serpin peptidase inhibitor, clade D (heparin cofactor), member 1                | 22q11.2 22q11.21 | CNV Association  | 0.74                              | 6.22        | 2.23E-09 | 0.03        | hHC022493 | NM_000185         |
| ASD CNV  | SETD1B      | 23067         | SET domain containing 1B                                                        | 12q24.31         | CNV Association  | 1.30                              | 21.60       | 6.47E-58 | 0.62        | hHR005194 | NM_015048         |
| ASD CNV  | SHANK3      | 85358         | SH3 and multiple ankyrin repeat domains 3                                       | 22q13.3          | CNV Association  | 0.69                              | 7.85        | 1.42E-13 | 0.10        | hHR018776 | NM_001080420      |
| ASD CNV  | SLC25A1     | 6576          | solute carrier family 25 (mitochondrial carrier; citrate transporter), member 1 | 22q11.21         | CNV Association  | 0.48                              | 8.50        | 2.19E-15 | 0.13        | hHC024586 | NM_005984         |
| ASD CNV  | SNRPN       | 6638          | small nuclear ribonucleoprotein polypeptide N                                   | 15q11.2          | CNV Association  | 0.09                              | 0.80        | 4.23E-01 | -0.13       | hHR008158 | AF400501          |
| ASD CNV  | SPN         | 6693          | sialophorin                                                                     | 16p11.2          | CNV Association  | 0.15                              | 3.40        | 7.88E-04 | -0.08       | hHC020872 | NM_001030288      |
| ASD CNV  | TAOK2       | 9344          | TAO kinase 2                                                                    | 16p11.2          | CNV Association  | 0.50                              | 5.08        | 7.67E-07 | -0.02       | hHA036912 | NM_004783         |
| ASD CNV  | TBL2        | 26608         | transducin (beta)-like 2                                                        | 7q11.23          | CNV Association  | 0.17                              | 2.61        | 9.66E-03 | -0.10       | hHC022487 | NM_012453         |
| ASD CNV  | TMF1        | 7110          | TATA element modulatory factor 1                                                | 3p21-p12         | CNV Association  | 0.24                              | 1.64        | 1.03E-01 | -0.12       | hHR006487 | NM_007114         |
| ASD CNV  | UBA3        | 9039          | ubiquitin-like modifier activating enzyme 3                                     | 3p24.3-p13       | CNV Association  | 1.38                              | 21.13       | 2.01E-56 | 0.61        | hHA037337 | NM_003968         |
| ASD CNV  | UBE3A       | 7337          | ubiquitin protein ligase E3A                                                    | 15q11-q13        | CNV Association  | 0.71                              | 6.01        | 7.11E-09 | 0.02        | hHA033034 | NM_130839         |
| ASD CNV  | UFD1L       | 7353          | ubiquitin fusion degradation 1 like (yeast)                                     | 22q11.21         | CNV Association  | 0.25                              | 5.15        | 5.60E-07 | -0.02       | hHC030312 | NM_005659         |
| ASD CNV  | VPS37D      | 155382        | vacuolar protein sorting 37 homolog D (S. cerevisiae)                           | 7q11.23          | CNV Association  | 0.81                              | 11.86       | 8.78E-26 | 0.29        | hHC021811 | NM_001077621      |
| ASD CNV  | WBSR28      | 135886        | Williams-Beuren syndrome chromosome region 28                                   | 7q11.23          | CNV Association  | 0.19                              | 2.53        | 1.21E-02 | -0.10       | hHC016628 | NM_182504         |
| ASD CNV  | ZNF74       | 7625          | zinc finger protein 74                                                          | 22q11.2 22q11.21 | CNV Association  | 1.57                              | 23.04       | 2.05E-62 | 0.65        | hHC014115 | NM_003426         |
| ASD CNV  | ADPGK       | 83440         | ADP-dependent glucokinase                                                       | 15q24.1          | CNV Association  | -0.36                             | -6.44       | 6.77E-10 | 0.04        | hHC014133 | NR_023318         |
| ASD CNV  | ARL6IP5     | 10550         | ADP-ribosylation-like factor 6 interacting protein 5                            | 3p14             | CNV Association  | -1.02                             | -16.17      | 4.03E-40 | 0.46        | hHC023865 | NM_006407         |
| ASD CNV  | ATP10A      | 57194         | ATPase, class V, type 10A                                                       | 15q11.2          | CNV Association  | -1.50                             | -10.73      | 3.76E-22 | 0.24        | hHC013443 | NM_024490         |
| ASD CNV  | BHLHE23     | 128408        | basic helix-loop-helix family, member e23                                       | 20q13.33         | CNV Association  | -0.16                             | -3.59       | 4.09E-04 | -0.07       | hHR024544 | NM_080606         |
| ASD CNV  | BRUNOL6     | 60677         | bruno-like 6, RNA binding protein (Drosophila)                                  | 15q24            | CNV Association  | -0.05                             | -0.76       | 4.49E-01 | -0.13       | hHR008016 | NM_052840         |
| ASD CNV  | C15orf2     | 23742         | chromosome 15 open reading frame 2                                              | 15q11-q13        | CNV Association  | -1.90                             | -19.39      | 7.92E-51 | 0.56        | hHR013304 | NM_018958         |
| ASD CNV  | C15orf34    | 80072         | chromosome 15 open reading frame 34                                             | 15q24.1          | CNV Association  | 0.00                              | 0.00        | 9.97E-01 | -0.13       | hHR008445 | BC068211          |
| ASD CNV  | C15orf59    | 388135        | chromosome 15 open reading frame 59                                             | 15q24.1          | CNV Association  | -0.85                             | -12.87      | 4.29E-29 | 0.33        | hHR021371 | NM_001039614      |
| ASD CNV  | C16orf54    | 283897        | chromosome 16 open reading frame 54                                             | 16p11.2          | CNV Association  | -0.01                             | -0.11       | 9.09E-01 | -0.13       | hHC017288 | NM_175900         |
| ASD CNV  | C22orf25    | 128989        | chromosome 22 open reading frame 25                                             | 22q11.21         | CNV Association  | -1.47                             | -23.16      | 8.40E-63 | 0.65        | hHC014819 | NM_152906         |

Supp Table 1 Gene Sets

| Gene Set | Gene Symbol | EntrezGene ID | Description                                                                                    | Location                 | Genetic Evidence | Beta Coefficient ("Fetal Effect") | t-statistic | p-value  | Adjusted R2 | Probe ID  | Ref Seq Accession |
|----------|-------------|---------------|------------------------------------------------------------------------------------------------|--------------------------|------------------|-----------------------------------|-------------|----------|-------------|-----------|-------------------|
| ASD CNV  | C3orf64     | 285203        | chromosome 3 open reading frame 64                                                             | 3p14.1                   | CNV Association  | -1.01                             | -8.82       | 2.57E-16 | 0.15        | hHC010483 | NM_173654         |
| ASD CNV  | C9orf66     | 157983        | chromosome 9 open reading frame 66                                                             | 9p24.3                   | CNV Association  | -0.38                             | -5.36       | 2.01E-07 | -0.01       | hHC008964 | NM_152569         |
| ASD CNV  | CCDC102B    | 79839         | coiled-coil domain containing 102B                                                             | 18q22.1                  | CNV Association  | -0.42                             | -2.23       | 2.68E-02 | -0.11       | hHC002972 | NM_001093729      |
| ASD CNV  | CDIPT       | 10423         | CDP-diacylglycerol--inositol 3-phosphatidyltransferase (phosphatidylinositol synthase)         | 16p11.2                  | CNV Association  | -0.59                             | -13.67      | 9.04E-32 | 0.37        | hHC022124 | NM_006319         |
| ASD CNV  | CLDN3       | 1365          | claudin 3                                                                                      | 7q11.23                  | CNV Association  | -0.27                             | -4.75       | 3.53E-06 | -0.03       | hHC022882 | NM_001306         |
| ASD CNV  | COMT        | NA            | catechol-O-methyltransferase                                                                   | 22q11.21-q11.23 22q11.21 | CNV Association  | -0.28                             | -5.30       | 2.66E-07 | -0.01       | hHA032822 | NM_000754         |
| ASD CNV  | CTNND2      | 1501          | catenin (cadherin-associated protein), delta 2 (neural plakophilin-related arm-repeat protein) | 5p15.2                   | CNV Association  | -0.07                             | -0.96       | 3.37E-01 | -0.13       | hHC005854 | NM_001332         |
| ASD CNV  | DGCR2       | 9993          | DiGeorge syndrome critical region gene 2                                                       | 22q11.21                 | CNV Association  | -0.73                             | -12.66      | 2.09E-28 | 0.33        | hHR017731 | NM_005137         |
| ASD CNV  | DGCR6       | 8214          | DiGeorge syndrome critical region gene 6                                                       | 22q11.21 22q11           | CNV Association  | -0.73                             | -13.54      | 2.53E-31 | 0.36        | hHC031997 | NM_005675         |
| ASD CNV  | DGCR6L      | 85359         | DiGeorge syndrome critical region gene 6-like                                                  | 22q11                    | CNV Association  | -0.74                             | -13.76      | 4.76E-32 | 0.37        | hHC031931 | NM_033257         |
| ASD CNV  | DGCR9       | 25787         | DiGeorge syndrome critical region gene 9                                                       | 22q11.21                 | CNV Association  | -0.60                             | -6.57       | 3.13E-10 | 0.04        | hHR023893 | NR_024159         |
| ASD CNV  | DLGAP2      | 9228          | discs, large (Drosophila) homolog-associated protein 2                                         | 8p23                     | CNV Association  | -2.22                             | -24.35      | 1.96E-66 | 0.68        | hHC002789 | NM_004745         |
| ASD CNV  | DOC2A       | 8448          | double C2-like domains, alpha                                                                  | 16p11.2                  | CNV Association  | -0.64                             | -13.19      | 3.67E-30 | 0.35        | hHC026830 | NM_003586         |
| ASD CNV  | DOCK8       | 81704         | dedicator of cytokinesis 8                                                                     | 9p24.3                   | CNV Association  | -1.52                             | -9.42       | 4.19E-18 | 0.18        | hHR007689 | NM_203447         |
| ASD CNV  | ELN         | 2006          | elastin                                                                                        | 7q11.23                  | CNV Association  | -0.03                             | -0.36       | 7.20E-01 | -0.13       | hHC023027 | NM_000501         |
| ASD CNV  | FMO5        | 2330          | flavin containing monooxygenase 5                                                              | 1q21.1                   | CNV Association  | -0.74                             | -9.65       | 8.54E-19 | 0.19        | hHC015181 | NM_001461         |
| ASD CNV  | FZD9        | 8326          | frizzled homolog 9 (Drosophila)                                                                | 7q11.23                  | CNV Association  | -0.41                             | -4.23       | 3.34E-05 | -0.05       | hHC020473 | U82169            |
| ASD CNV  | GABRA5      | NA            | gamma-aminobutyric acid (GABA) A receptor, alpha 5                                             | 15q11.2-q12              | CNV Association  | -2.43                             | -27.43      | 1.71E-75 | 0.73        | hHC009760 | BC011403          |
| ASD CNV  | GABRG3      | 2567          | gamma-aminobutyric acid (GABA) A receptor, gamma 3                                             | 15q12                    | CNV Association  | -0.44                             | -4.38       | 1.81E-05 | -0.05       | hHC022899 | NM_033223         |
| ASD CNV  | GJA8        | 2703          | gap junction protein, alpha 8, 50kDa                                                           | 1q21.1                   | CNV Association  | -0.49                             | -6.30       | 1.40E-09 | 0.03        | hHR032123 | NM_005267         |
| ASD CNV  | GNB1L       | 54584         | guanine nucleotide binding protein (G protein), beta polypeptide 1-like                        | 22q11.2                  | CNV Association  | -0.25                             | -3.92       | 1.14E-04 | -0.06       | hHC021043 | NM_053004         |
| ASD CNV  | GRAMD2      | 196996        | GRAM domain containing 2                                                                       | 15q23                    | CNV Association  | -1.04                             | -9.05       | 5.38E-17 | 0.16        | hHC011872 | NM_001012642      |
| ASD CNV  | HERC2       | 8924          | hect domain and RLD 2                                                                          | 15q13                    | CNV Association  | -0.40                             | -5.52       | 8.70E-08 | 0.00        | hHC002570 | NM_004667         |
| ASD CNV  | HIGD2B      | 123346        | HIG1 hypoxia inducible domain family, member 2B (pseudogene)                                   | 15q24.1                  | CNV Association  | -0.31                             | -5.05       | 9.00E-07 | -0.02       | hHR027193 | NR_002780         |
| ASD CNV  | HPD         | 3242          | 4-hydroxyphenylpyruvate dioxygenase                                                            | 12q24-qter               | CNV Association  | -0.12                             | -1.69       | 9.20E-02 | -0.12       | hHC019295 | NM_002150         |
| ASD CNV  | INO80E      | NA            | INO80 complex subunit E                                                                        | 16p11.2                  | CNV Association  | -0.03                             | -0.68       | 4.98E-01 | -0.13       | hHC019698 | NM_173618         |
| ASD CNV  | IPW         | 3653          | imprinted in Prader-Willi syndrome (non-protein coding)                                        | 15q11-q12                | CNV Association  | -0.06                             | -0.64       | 5.21E-01 | -0.13       | hHR003918 | NR_023915         |
| ASD CNV  | KLF13       | 51621         | Kruppel-like factor 13                                                                         | 15q12                    | CNV Association  | -0.53                             | -6.24       | 2.04E-09 | 0.03        | hHC004305 | NM_015995         |
| ASD CNV  | KLHDC7B     | 113730        | kelch domain containing 7B                                                                     | 22q13.33                 | CNV Association  | -0.02                             | -0.32       | 7.49E-01 | -0.13       | hHC019446 | NM_138433         |
| ASD CNV  | LAT2        | 7462          | linker for activation of T cells family, member 2                                              | 7q11.23                  | CNV Association  | -1.22                             | -8.35       | 5.75E-15 | 0.13        | hHC014111 | NM_032464         |
| ASD CNV  | LIMK1       | 3984          | LIM domain kinase 1                                                                            | 7q11.23                  | CNV Association  | -0.50                             | -6.61       | 2.58E-10 | 0.05        | hHC007551 | NM_002314         |
| ASD CNV  | LMF2        | 91289         | lipase maturation factor 2                                                                     | 22q13.33                 | CNV Association  | -0.08                             | -1.97       | 5.01E-02 | -0.11       | hHC025977 | NM_033200         |
| ASD CNV  | LMOD3       | 56203         | leiomodrin 3 (fetal)                                                                           | 3p14.1                   | CNV Association  | -0.35                             | -2.75       | 6.50E-03 | -0.10       | hHC007604 | NM_198271         |
| ASD CNV  | MAGEL2      | 54551         | MAGE-like 2                                                                                    | 15q11-q12                | CNV Association  | -0.45                             | -5.28       | 2.92E-07 | -0.01       | hHC009144 | NM_019066         |
| ASD CNV  | MAPK3       | 5595          | mitogen-activated protein kinase 3                                                             | 16p11.2                  | CNV Association  | -1.22                             | -20.77      | 2.91E-55 | 0.60        | hHC016199 | NM_001040056      |
| ASD CNV  | MAPK8IP2    | 23542         | mitogen-activated protein kinase 8 interacting protein 2                                       | 22q13.33                 | CNV Association  | -1.04                             | -19.21      | 3.20E-50 | 0.56        | hHC024365 | NM_012324         |

Supp Table 1 Gene Sets

| Gene Set | Gene Symbol | EntrezGene ID | Description                                                                    | Location               | Genetic Evidence | Beta Coefficient ("Fetal Effect") | t-statistic | p-value  | Adjusted R2 | Probe ID  | Ref Seq Accession |
|----------|-------------|---------------|--------------------------------------------------------------------------------|------------------------|------------------|-----------------------------------|-------------|----------|-------------|-----------|-------------------|
| ASD CNV  | MAZ         | 4150          | MYC-associated zinc finger protein (purine-binding transcription factor)       | 16p11.2                | CNV Association  | -0.06                             | -1.78       | 7.63E-02 | -0.12       | hHC023211 | NM_001042539      |
| ASD CNV  | MED15       | 51586         | mediator complex subunit 15                                                    | 22q11.2                | CNV Association  | -0.49                             | -10.55      | 1.36E-21 | 0.23        | hHC027374 | NM_001003891      |
| ASD CNV  | MIOX        | 55586         | myo-inositol oxygenase                                                         | 22q13.3                | CNV Association  | -0.52                             | -9.44       | 3.55E-18 | 0.18        | hHC021730 | NM_017584         |
| ASD CNV  | MRPL40      | 64976         | mitochondrial ribosomal protein L40                                            | 22q11.21               | CNV Association  | -0.50                             | -7.82       | 1.74E-13 | 0.10        | hHC015360 | NM_003776         |
| ASD CNV  | MVP         | 9961          | major vault protein                                                            | 16p13.1-p11.2          | CNV Association  | -1.16                             | -12.58      | 3.84E-28 | 0.32        | hHC023971 | NM_017458         |
| ASD CNV  | NDN         | 4692          | necdin homolog (mouse)                                                         | 15q11.2-q12            | CNV Association  | -0.01                             | -0.10       | 9.18E-01 | -0.13       | hHC023479 | NM_002487         |
| ASD CNV  | NECAB2      | 54550         | N-terminal EF-hand calcium binding protein 2                                   | 16q23.3                | CNV Association  | -2.30                             | -17.89      | 7.29E-46 | 0.52        | hHC021220 | NM_019065         |
| ASD CNV  | NPTN        | 27020         | neuroplastin                                                                   | 15q22                  | CNV Association  | -1.30                             | -23.00      | 2.56E-62 | 0.65        | hHC018056 | NM_012428         |
| ASD CNV  | OCA2        | 4948          | oculocutaneous albinism II                                                     | 15q11.2-q12            | CNV Association  | -0.54                             | -4.48       | 1.17E-05 | -0.04       | hHC004293 | NM_000275         |
| ASD CNV  | ODF3B       | 440836        | outer dense fiber of sperm tails 3B                                            | 22q13 22q13.33         | CNV Association  | -0.29                             | -5.44       | 1.30E-07 | -0.01       | hHA038946 | NM_001014440      |
| ASD CNV  | OTUD7A      | 161725        | OTU domain containing 7A                                                       | 15q13.3                | CNV Association  | -0.96                             | -10.35      | 6.01E-21 | 0.22        | hHC013904 | NM_130901         |
| ASD CNV  | PAR1        | 145624        | Prader-Willi/Angelman region-1                                                 | 15q11.2                | CNV Association  | -0.39                             | -3.59       | 4.03E-04 | -0.07       | hHR012219 | NR_022009         |
| ASD CNV  | PRODH       | 5625          | proline dehydrogenase (oxidase) 1                                              | 22q11.21               | CNV Association  | -1.01                             | -9.02       | 6.36E-17 | 0.16        | hHR022951 | NM_016335         |
| ASD CNV  | PRRT2       | 112476        | proline-rich transmembrane protein 2                                           | 16p11.2                | CNV Association  | -0.57                             | -7.73       | 3.02E-13 | 0.10        | hHC012542 | NM_145239         |
| ASD CNV  | QPRT        | 23475         | quinolinate phosphoribosyltransferase                                          | 16p11.2                | CNV Association  | -0.86                             | -10.74      | 3.41E-22 | 0.24        | hHC023172 | NM_014298         |
| ASD CNV  | RHOF        | NA            | ras homolog gene family, member F (in filopodia)                               | 12q24.31               | CNV Association  | -1.58                             | -23.39      | 1.67E-63 | 0.66        | hHR019557 | NM_019034         |
| ASD CNV  | RTN4R       | 65078         | reticulon 4 receptor                                                           | 22q11.21               | CNV Association  | -0.81                             | -9.38       | 5.47E-18 | 0.18        | hHC015361 | NM_023004         |
| ASD CNV  | SBF1        | 6305          | SET binding factor 1                                                           | 22q13.33               | CNV Association  | -0.41                             | -6.04       | 5.82E-09 | 0.02        | hHC030360 | NM_002972         |
| ASD CNV  | SCARF2      | 91179         | scavenger receptor class F, member 2                                           | 22q11.21               | CNV Association  | -0.17                             | -3.01       | 2.92E-03 | -0.09       | hHC025789 | NM_153334         |
| ASD CNV  | SCO2        | 9997          | SCO cytochrome oxidase deficient homolog 2 (yeast)                             | 22q13.33               | CNV Association  | -0.57                             | -9.18       | 2.20E-17 | 0.17        | hHC017980 | NM_005138         |
| ASD CNV  | SEZ6L2      | 26470         | seizure related 6 homolog (mouse)-like 2                                       | 16p11.2                | CNV Association  | -1.44                             | -16.87      | 1.83E-42 | 0.49        | hHA039718 | NM_201575         |
| ASD CNV  | SLC17A9     | 63910         | solute carrier family 17, member 9                                             | 20q13.33               | CNV Association  | -1.65                             | -10.49      | 2.08E-21 | 0.23        | hHC020002 | NM_022082         |
| ASD CNV  | SLC38A8     | 146167        | solute carrier family 38, member 8                                             | 16q23.3                | CNV Association  | -0.45                             | -2.82       | 5.17E-03 | -0.09       | hHR017767 | NM_001080442      |
| ASD CNV  | SLC7A4      | 6545          | solute carrier family 7 (cationic amino acid transporter, y+ system), member 4 | 22q11.21               | CNV Association  | -0.83                             | -12.06      | 1.97E-26 | 0.30        | hHC023947 | NM_004173         |
| ASD CNV  | SNAP29      | 9342          | synaptosomal-associated protein, 29kDa                                         | 22q11.21               | CNV Association  | -0.69                             | -9.68       | 6.90E-19 | 0.19        | hHC007354 | NM_004782         |
| ASD CNV  | SNURF       | 8926          | SNRPN upstream reading frame                                                   | 15q11.2                | CNV Association  | -1.69                             | -25.02      | 1.84E-68 | 0.69        | hHA033189 | NM_005678         |
| ASD CNV  | STX1A       | 6804          | syntaxin 1A (brain)                                                            | 7q11.23                | CNV Association  | -1.52                             | -18.84      | 5.20E-49 | 0.55        | hHC022261 | NM_004603         |
| ASD CNV  | SUCLG2      | 8801          | succinate-CoA ligase, GDP-forming, beta subunit                                | 3p14.1                 | CNV Association  | -0.60                             | -8.90       | 1.49E-16 | 0.15        | hHR027954 | NM_003848         |
| ASD CNV  | TBX1        | 6899          | T-box 1                                                                        | 22q11.21               | CNV Association  | -0.70                             | -11.59      | 6.57E-25 | 0.28        | hHA037074 | NM_080647         |
| ASD CNV  | TBX6        | 6911          | T-box 6                                                                        | 16p11.2                | CNV Association  | -0.78                             | -9.56       | 1.59E-18 | 0.18        | hHA040492 | NM_004608         |
| ASD CNV  | TCFL5       | 10732         | transcription factor-like 5 (basic helix-loop-helix)                           | 20q13.3-qter           | CNV Association  | -1.11                             | -12.39      | 1.62E-27 | 0.31        | hHC005107 | NM_006602         |
| ASD CNV  | THAP7       | 80764         | THAP domain containing 7                                                       | 22q11.2                | CNV Association  | -0.13                             | -3.41       | 7.74E-04 | -0.08       | hHC021948 | CR605890          |
| ASD CNV  | TMEM219     | 124446        | transmembrane protein 219                                                      | 16p11.2                | CNV Association  | -0.95                             | -18.45      | 1.04E-47 | 0.54        | hHR015749 | NM_001083613      |
| ASD CNV  | TRMT2A      | 27037         | TRM2 tRNA methyltransferase 2 homolog A (S. cerevisiae)                        | 22q11.1-22q13 22q11.21 | CNV Association  | -0.40                             | -5.92       | 1.14E-08 | 0.01        | hHA038708 | NM_022727         |
| ASD CNV  | TSSK2       | NA            | testis-specific serine kinase 2                                                | 22q11.21               | CNV Association  | -0.55                             | -5.51       | 9.14E-08 | 0.00        | hHC020559 | NM_053006         |
| ASD CNV  | TXNRD2      | 10587         | thioredoxin reductase 2                                                        | 22q11.21               | CNV Association  | -0.84                             | -16.35      | 9.34E-41 | 0.47        | hHC023645 | NM_006440         |
| ASD CNV  | TYMP        | 1890          | thymidine phosphorylase                                                        | 22q13 22q13.33         | CNV Association  | -0.59                             | -4.52       | 9.87E-06 | -0.04       | hHC023665 | NM_001113755      |
| ASD CNV  | WBSR22      | 114049        | Williams Beuren syndrome chromosome region 22                                  | -                      | CNV Association  | -0.37                             | -8.11       | 2.77E-14 | 0.11        | hHR005117 | NM_017528         |
| ASD CNV  | WBSR27      | 155368        | Williams Beuren syndrome chromosome region 27                                  | 7q11.23                | CNV Association  | -0.29                             | -2.22       | 2.74E-02 | -0.11       | hHC012588 | NM_152559         |

Supp Table 1 Gene Sets

| Gene Set     | Gene Symbol | EntrezGene ID | Description                                                                    | Location         | Genetic Evidence                              | Beta Coefficient ("Fetal Effect") | t-statistic | p-value  | Adjusted R2 | Probe ID  | Ref Seq Accession |
|--------------|-------------|---------------|--------------------------------------------------------------------------------|------------------|-----------------------------------------------|-----------------------------------|-------------|----------|-------------|-----------|-------------------|
| ASD CNV      | WDR66       | 144406        | WD repeat domain 66                                                            | 12q24.31         | CNV Association                               | -0.58                             | -6.48       | 5.32E-10 | 0.04        | hHC007415 | NM_144668         |
| ASD CNV      | YPEL3       | 83719         | yippee-like 3 (Drosophila)                                                     | 16p11.2          | CNV Association                               | -0.95                             | -16.01      | 1.35E-39 | 0.46        | hHC002415 | NM_031477         |
| ASD CNV      | ZDHC8       | 29801         | zinc finger, DHHC-type containing 8                                            | 22q11.21         | CNV Association                               | -0.16                             | -3.59       | 4.09E-04 | -0.07       | hHC029138 | NM_013373         |
| ASD DATABASE | AUTS2       | 26053         | autism susceptibility candidate 2                                              | 7q11.22          | Rare Single Gene variant                      | 3.12                              | 33.97       | 4.92E-93 | 0.81        | hHC003332 | NM_015570         |
| ASD DATABASE | DAB1        | 1600          | disabled homolog 1 (Drosophila)                                                | 1p32-p31         | Functional                                    | 2.96                              | 33.92       | 6.42E-93 | 0.81        | hHE041224 | AB210012          |
| ASD DATABASE | ANK3        | 288           | ankyrin 3, node of Ranvier (ankyrin G)                                         | 10q21            | Genetic Association                           | 2.42                              | 22.94       | 4.18E-62 | 0.65        | hHA034365 | NM_020987         |
| ASD DATABASE | NFIA        | 4774          | nuclear factor I/A                                                             | 1p31.3-p31.2     | Rare Single Gene variant                      | 2.40                              | 28.64       | 6.55E-79 | 0.75        | hHC001484 | NM_001134673      |
| ASD DATABASE | ROBO1       | 6091          | roundabout, axon guidance receptor, homolog 1 (Drosophila)                     | 3p12             | Genetic Association                           | 2.40                              | 29.38       | 5.67E-81 | 0.76        | hHC002741 | NM_133631         |
| ASD DATABASE | SOX5        | 6660          | SRY (sex determining region Y)-box 5                                           | 12p12.1          | Rare single gene variant                      | 2.23                              | 20.12       | 3.37E-53 | 0.58        | hHA035450 | NM_006940         |
| ASD DATABASE | POGZ        | 23126         | pogo transposable element with ZNF domain                                      | 1q21.3           | Rare single gene variant                      | 2.23                              | 21.62       | 5.63E-58 | 0.62        | hHA034135 | NM_145796         |
| ASD DATABASE | ZSWIM5      | 57643         | zinc finger, SWIM-type containing 5                                            | 1p34.1           | Rare Single Gene variant                      | 2.20                              | 30.43       | 8.08E-84 | 0.77        | hHR019994 | NM_020883         |
| ASD DATABASE | DLX2        | 1746          | distal-less homeobox 2                                                         | 2q32             | Genetic Association                           | 2.11                              | 14.79       | 1.69E-35 | 0.41        | hHC006280 | NM_004405         |
| ASD DATABASE | CACNA1H     | 8912          | calcium channel, voltage-dependent, T type, alpha 1H subunit                   | 16p13.3          | Rare Single Gene variant                      | 2.06                              | 21.73       | 2.49E-58 | 0.62        | hHC005422 | NM_021098         |
| ASD DATABASE | FEZF2       | 55079         | FEZ family zinc finger 2                                                       | 3p14.2           | Genetic Association                           | 2.04                              | 16.43       | 5.27E-41 | 0.47        | hHC017900 | NM_018008         |
| ASD DATABASE | LAMA1       | 284217        | laminin, alpha 1                                                               | 18p11.31         | Genetic association                           | 2.02                              | 14.87       | 9.22E-36 | 0.41        | hHC007864 | NM_005559         |
| ASD DATABASE | HMG1        | 3150          | high-mobility group nucleosome binding domain 1                                | 21q22.3 21q22.2  | Genetic Association                           | 2.02                              | 23.73       | 1.44E-64 | 0.67        | hHR030827 | NM_004965         |
| ASD DATABASE | BCL2        | 596           | B-cell CLL/lymphoma 2                                                          | 18q21.33 18q21.3 | Functional                                    | 1.97                              | 19.05       | 1.03E-49 | 0.55        | hHA033818 | NM_000633         |
| ASD DATABASE | BRCA2       | 675           | breast cancer 2, early onset                                                   | 13q12.3          | Rare Single Gene variant                      | 1.89                              | 11.56       | 8.44E-25 | 0.28        | hHC005360 | NM_000059         |
| ASD DATABASE | VASH1       | 22846         | vasohibin 1                                                                    | 14q24.3          | Genetic Association                           | 1.87                              | 24.78       | 9.58E-68 | 0.69        | hHC015490 | NM_014909         |
| ASD DATABASE | ADNP        | 23394         | activity-dependent neuroprotector homeobox                                     | 20q13.13         | Rare Single Gene variant                      | 1.85                              | 23.34       | 2.27E-63 | 0.66        | hHA037442 | NM_015339         |
| ASD DATABASE | CTTNBP2     | 83992         | cortactin binding protein 2                                                    | 7q31             | Rare Single Gene variant                      | 1.84                              | 21.69       | 3.31E-58 | 0.62        | hHC004724 | NM_033427         |
| ASD DATABASE | LRRC7       | 57554         | leucine rich repeat containing 7                                               | 1p31.1           | Functional                                    | 1.78                              | 21.18       | 1.36E-56 | 0.61        | hHC003436 | NM_020794         |
| ASD DATABASE | GRIK2       | 2898          | glutamate receptor, ionotropic, kainate 2                                      | 6q16.3-q21       | Genetic Association                           | 1.76                              | 22.53       | 7.68E-61 | 0.64        | hHC019020 | NM_175768         |
| ASD DATABASE | GRIP1       | 23426         | glutamate receptor interacting protein 1                                       | 12q14.3          | Rare Single Gene variant, Genetic Association | 1.69                              | 21.90       | 7.36E-59 | 0.63        | hHR016670 | NM_021150         |
| ASD DATABASE | SETDB1      | 9869          | SET domain, bifurcated 1                                                       | 1q21             | Rare single gene variant                      | 1.68                              | 27.38       | 2.43E-75 | 0.73        | hHC006984 | BC028671          |
| ASD DATABASE | SUV420H1    | 51111         | suppressor of variegation 4-20 homolog 1 (Drosophila)                          | 11q13.2          | Rare Single Gene variant                      | 1.68                              | 25.50       | 6.94E-70 | 0.70        | hHA033920 | NM_017635         |
| ASD DATABASE | JMJD1C      | 221037        | jumonji domain containing 1C                                                   | 10q21.2-q21.3    | Rare single gene variant                      | 1.67                              | 21.97       | 4.21E-59 | 0.63        | hHC023549 | NM_032776         |
| ASD DATABASE | CNTN4       | 152330        | contactin 4                                                                    | 3p26-p25         | Rare Single Gene variant                      | 1.57                              | 12.93       | 2.75E-29 | 0.34        | hHA040420 | NM_175607         |
| ASD DATABASE | OTX1        | 5013          | orthodenticle homeobox 1                                                       | 2p13             | Genetic association                           | 1.54                              | 13.46       | 4.58E-31 | 0.36        | hHC011290 | NM_014562         |
| ASD DATABASE | UBR5        | NA            | ubiquitin protein ligase E3 component n-recogin 5                              | 8q22             | Rare single gene variant                      | 1.53                              | 15.90       | 3.02E-39 | 0.45        | hHC001627 | CDS11402          |
| ASD DATABASE | EPHB2       | 2048          | EPH receptor B2                                                                | 1p36.1-p35       | Rare single gene variant                      | 1.49                              | 21.44       | 2.07E-57 | 0.62        | hHC020957 | NM_004442         |
| ASD DATABASE | LRRC1       | 55227         | leucine rich repeat containing 1                                               | 6p12.1           | Genetic Association                           | 1.33                              | 12.30       | 3.17E-27 | 0.31        | hHA037417 | NM_018214         |
| ASD DATABASE | NBEA        | 26960         | neurobeachin                                                                   | 13q13            | Rare single gene variant                      | 1.31                              | 25.39       | 1.52E-69 | 0.70        | hHC002233 | NM_015678         |
| ASD DATABASE | UBA6        | 55236         | ubiquitin-like modifier activating enzyme 6                                    | 4q13.2           | Functional                                    | 1.29                              | 22.24       | 6.13E-60 | 0.63        | hHC003689 | NM_018227         |
| ASD DATABASE | NRP2        | 8828          | neuropilin 2                                                                   | 2q33.3           | Genetic Association                           | 1.29                              | 11.84       | 1.01E-25 | 0.29        | hHC009632 | NM_201266         |
| ASD DATABASE | MARK1       | 4139          | MAP/microtubule affinity-regulating kinase 1                                   | 1q41             | Genetic association/Functional                | 1.26                              | 18.60       | 3.11E-48 | 0.54        | hHC007557 | NM_018650         |
| ASD DATABASE | SLC25A24    | 29957         | solute carrier family 25 (mitochondrial carrier; phosphate carrier), member 24 | 1p13.3           | Functional                                    | 1.25                              | 12.20       | 6.92E-27 | 0.31        | hHC003620 | NM_013386         |
| ASD DATABASE | ST7         | 7982          | suppression of tumorigenicity 7                                                | 7q31.1-q31.3     | Rare Single Gene variant                      | 1.16                              | 20.39       | 4.81E-54 | 0.59        | hHC008055 | NM_018412         |
| ASD DATABASE | MACROD2     | 140733        | MACRO domain containing 2                                                      | 20p12.1          | Genetic Association                           | 1.12                              | 12.11       | 1.38E-26 | 0.30        | hHR007786 | BC128036          |

Supp Table 1 Gene Sets

| Gene Set     | Gene Symbol | EntrezGene ID | Description                                                                   | Location         | Genetic Evidence         | Beta Coefficient ("Fetal Effect") | t-statistic | p-value  | Adjusted R2 | Probe ID  | Ref Seq Accession |
|--------------|-------------|---------------|-------------------------------------------------------------------------------|------------------|--------------------------|-----------------------------------|-------------|----------|-------------|-----------|-------------------|
| ASD DATABASE | ST8SIA2     | 8128          | ST8 alpha-N-acetyl-neuraminide alpha-2,8-sialyltransferase 2                  | 15q26            | Genetic Association      | 1.12                              | 10.38       | 4.76E-21 | 0.22        | hHC017702 | NM_006011         |
| ASD DATABASE | DIAPH3      | 81624         | diaphanous homolog 3 (Drosophila)                                             | 13q21.2          | Rare Single Gene variant | 1.12                              | 8.02        | 4.98E-14 | 0.11        | hHC016253 | NM_030932         |
| ASD DATABASE | CNTNAP3     | 79937         | contactin associated protein-like 3                                           | 9p13.1           | Rare Single Gene variant | 1.11                              | 9.93        | 1.22E-19 | 0.20        | hHR030569 | NM_033655         |
| ASD DATABASE | KIAA1586    | 57691         | KIAA1586                                                                      | 6p12.1           | Rare Single Gene variant | 1.10                              | 10.99       | 5.56E-23 | 0.25        | hHC008010 | NM_020931         |
| ASD DATABASE | PSD3        | 23362         | pleckstrin and Sec7 domain containing 3                                       | 8pter-p23.3      | Rare Single Gene variant | 1.09                              | 10.33       | 6.62E-21 | 0.22        | hHA036085 | NM_015310         |
| ASD DATABASE | JARID2      | 3720          | jumonji, AT rich interactive domain 2                                         | 6p24-p23         | Genetic association      | 1.08                              | 16.74       | 4.66E-42 | 0.48        | hHC009434 | NM_004973         |
| ASD DATABASE | HS3ST5      | 222537        | heparan sulfate (glucosamine) 3-O-sulfotransferase 5                          | 6q22.31          | Genetic Association      | 1.02                              | 9.69        | 6.38E-19 | 0.19        | hHR004521 | NM_153612         |
| ASD DATABASE | NRCAM       | 4897          | neuronal cell adhesion molecule                                               | 7q31.1-q31.2     | Genetic Association      | 1.02                              | 11.78       | 1.66E-25 | 0.29        | hHA035333 | NM_001037132      |
| ASD DATABASE | EIF4EBP2    | 1979          | eukaryotic translation initiation factor 4E binding protein 2                 | 10q21-q22        | Functional               | 1.02                              | 19.07       | 9.46E-50 | 0.55        | hHR029057 | NM_004096         |
| ASD DATABASE | RAI1        | 10743         | retinoic acid induced 1                                                       | 17p11.2          | Rare Single Gene variant | 0.99                              | 15.41       | 1.40E-37 | 0.44        | hHC011816 | NM_030665         |
| ASD DATABASE | TBR1        | 10716         | T-box, brain, 1                                                               | 2q24             | Rare Single Gene variant | 0.99                              | 9.31        | 8.89E-18 | 0.17        | hHC005106 | NM_006593         |
| ASD DATABASE | TAF1C       | 9013          | TATA box binding protein (TBP)-associated factor, RNA polymerase I, C, 110kDa | 16q24            | Genetic association      | 0.97                              | 15.11       | 1.40E-36 | 0.42        | hHC014149 | NM_005679         |
| ASD DATABASE | YEATS2      | 55689         | YEATS domain containing 2                                                     | 3q27.1           | Genetic association      | 0.97                              | 18.26       | 4.32E-47 | 0.53        | hHC002724 | NM_018023         |
| ASD DATABASE | SETD2       | 29072         | SET domain containing 2                                                       | 3p21.31          | Rare Single Gene variant | 0.96                              | 20.38       | 5.06E-54 | 0.59        | hHC017824 | NM_014159         |
| ASD DATABASE | SHANK2      | 22941         | SH3 and multiple ankyrin repeat domains 2                                     | 11q13.3          | Rare Single Gene variant | 0.94                              | 10.27       | 1.06E-20 | 0.22        | hHA034077 | NM_012309         |
| ASD DATABASE | MTR         | 4548          | 5-methyltetrahydrofolate-homocysteine methyltransferase                       |                  | Functional               | 0.94                              | 13.86       | 2.23E-32 | 0.38        | hHC007040 | NM_000254         |
| ASD DATABASE | APC         | 324           | adenomatous polyposis coli                                                    | 5q21-q22         | Genetic Association      | 0.94                              | 8.68        | 6.67E-16 | 0.14        | hHA034118 | NM_001127511      |
| ASD DATABASE | XPO1        | 7514          | exportin 1 (CRM1 homolog, yeast)                                              | 2p16             | Genetic association      | 0.92                              | 17.48       | 1.65E-44 | 0.51        | hHC005732 | NM_003400         |
| ASD DATABASE | CLTCL1      | 8218          | clathrin, heavy chain-like 1                                                  | 22q11.2 22q11.21 | Rare single gene variant | 0.90                              | 9.68        | 7.00E-19 | 0.19        | hHA036352 | NM_007098         |
| ASD DATABASE | A2BP1       | 54715         | ataxin 2-binding protein 1                                                    | 16p13.3          | Genetic Association      | 0.90                              | 13.45       | 5.14E-31 | 0.36        | hHC022670 | NM_018723         |
| ASD DATABASE | EP400       | 57634         | E1A binding protein p400                                                      | 12q24.33         | Rare single gene variant | 0.90                              | 14.40       | 3.44E-34 | 0.40        | hHR012430 | NM_015409         |
| ASD DATABASE | MAPK1       | 5594          | mitogen-activated protein kinase 1                                            | 22q11.2 22q11.21 | Functional               | 0.89                              | 11.80       | 1.34E-25 | 0.29        | hHA035377 | NM_138957         |
| ASD DATABASE | CNTN3       | 5067          | contactin 3 (plasmacytoma associated)                                         | 3p26             | Rare Single Gene variant | 0.89                              | 8.06        | 3.71E-14 | 0.11        | hHR004942 | NM_020872         |
| ASD DATABASE | AFF4        | 27125         | AF4/FMR2 family, member 4                                                     | 5q31             | Rare Single Gene variant | 0.88                              | 3.83        | 1.66E-04 | -0.06       | hHC002880 | NM_014423         |
| ASD DATABASE | EP300       | 2033          | E1A binding protein p300                                                      | 22q13.2          | Rare Single Gene variant | 0.88                              | 12.68       | 1.76E-28 | 0.33        | hHC012239 | NM_001429         |
| ASD DATABASE | CHRNA7      | 1139          | cholinergic receptor, nicotinic, alpha 7                                      | 15q14            | Rare single gene variant | 0.83                              | 5.64        | 4.76E-08 | 0.00        | hHR025141 | NM_000746         |
| ASD DATABASE | MAP2        | 4133          | microtubule-associated protein 2                                              | 2q34-q35         | Rare Single Gene variant | 0.83                              | 8.08        | 3.24E-14 | 0.11        | hHC022926 | NM_002374         |
| ASD DATABASE | DCTN5       | 84516         | dynactin 5 (p25)                                                              | 16p12.1          | Rare Single Gene variant | 0.81                              | 11.51       | 1.24E-24 | 0.27        | hHR027462 | NM_032486         |
| ASD DATABASE | CADM1       | 23705         | cell adhesion molecule 1                                                      | 11q23.2          | Rare Single Gene variant | 0.80                              | 7.20        | 7.70E-12 | 0.07        | hHR011178 | NM_014333         |
| ASD DATABASE | GUCY1A2     | 2977          | guanylate cyclase 1, soluble, alpha 2                                         | 11q21-q22        | Genetic association      | 0.77                              | 8.67        | 6.84E-16 | 0.14        | hHC011966 | NM_000855         |
| ASD DATABASE | MBD5        | 55777         | methyl-CpG binding domain protein 5                                           | 2q23.1           | Rare single gene variant | 0.77                              | 12.57       | 4.17E-28 | 0.32        | hHC004339 | NM_018328         |
| ASD DATABASE | SLC30A5     | 64924         | solute carrier family 30 (zinc transporter), member 5                         | 5q12.1           | Rare Single Gene variant | 0.76                              | 9.73        | 4.71E-19 | 0.19        | hHA033870 | NM_022902         |
| ASD DATABASE | DLX1        | 1745          | distal-less homeobox 1                                                        | 2q32             | Genetic Association      | 0.74                              | 5.04        | 9.24E-07 | -0.02       | hHC006676 | NM_178120         |
| ASD DATABASE | KHDRBS2     | 202559        | KH domain containing, RNA binding, signal transduction associated 2           | 6q11.1           | Rare Single Gene variant | 0.72                              | 8.55        | 1.49E-15 | 0.14        | hHC008977 | NM_152688         |
| ASD DATABASE | UBE3A       | 7337          | ubiquitin protein ligase E3A                                                  | 15q11-q13        | Genetic Association      | 0.71                              | 6.01        | 7.11E-09 | 0.02        | hHA033034 | NM_130839         |
| ASD DATABASE | EIF4E       | 1977          | eukaryotic translation initiation factor 4E                                   | 4q21-q25         | Rare single gene variant | 0.70                              | 8.47        | 2.68E-15 | 0.13        | hHC030864 | NM_001130679      |
| ASD DATABASE | HDAC4       | 9759          | histone deacetylase 4                                                         | 2q37.3           | Genetic Association      | 0.70                              | 5.88        | 1.38E-08 | 0.01        | hHC005088 | NM_006037         |
| ASD DATABASE | SHANK3      | 85358         | SH3 and multiple ankyrin repeat domains 3                                     | 22q13.3          | Rare Single Gene variant | 0.69                              | 7.85        | 1.42E-13 | 0.10        | hHR018776 | NM_001080420      |

Supp Table 1 Gene Sets

| Gene Set     | Gene Symbol | EntrezGene ID | Description                                                                                 | Location        | Genetic Evidence                              | Beta Coefficient ("Fetal Effect") | t-statistic | p-value  | Adjusted R2 | Probe ID  | Ref Seq Accession |
|--------------|-------------|---------------|---------------------------------------------------------------------------------------------|-----------------|-----------------------------------------------|-----------------------------------|-------------|----------|-------------|-----------|-------------------|
| ASD DATABASE | ITGB3BP     | 23421         | integrin beta 3 binding protein (beta3-endonexin)                                           | 1p31.3          | Genetic Association                           | 0.69                              | 4.82        | 2.52E-06 | -0.03       | hHA035416 | NM_014288         |
| ASD DATABASE | TLK2        | 11011         | tousled-like kinase 2                                                                       | 17q23           | Rare Single Gene variant                      | 0.66                              | 11.43       | 2.13E-24 | 0.27        | hHC030724 | NM_006852         |
| ASD DATABASE | YTHDC2      | 64848         | YTH domain containing 2                                                                     | 5q22.2          | Rare Single Gene variant                      | 0.66                              | 7.26        | 5.38E-12 | 0.08        | hHC004011 | NM_022828         |
| ASD DATABASE | GSK3B       | 2932          | glycogen synthase kinase 3 beta                                                             | 3q13.3          | Functional                                    | 0.66                              | 9.27        | 1.19E-17 | 0.17        | hHR024272 | NM_002093         |
| ASD DATABASE | PLAUR       | 5329          | plasminogen activator, urokinase receptor                                                   | 19q13           | Genetic association                           | 0.64                              | 7.12        | 1.27E-11 | 0.07        | hHC020214 | NM_002659         |
| ASD DATABASE | TSN         | 7247          | translin                                                                                    | 2q21.1          | Functional                                    | 0.64                              | 7.85        | 1.47E-13 | 0.10        | hHA040599 | NM_004622         |
| ASD DATABASE | ZNF18       | 7566          | zinc finger protein 18                                                                      | 17p11.2         | Rare single gene variant                      | 0.63                              | 6.74        | 1.17E-10 | 0.05        | hHC019788 | NM_144680         |
| ASD DATABASE | DAPK1       | 1612          | death-associated protein kinase 1                                                           | 9q34.1          | Genetic Association                           | 0.57                              | 8.42        | 3.73E-15 | 0.13        | hHC008562 | NM_004938         |
| ASD DATABASE | RORA        | 6095          | RAR-related orphan receptor A                                                               | 15q21.3         | Functional                                    | 0.56                              | 4.71        | 4.13E-06 | -0.03       | hHA033097 | NM_134260         |
| ASD DATABASE | UBE2H       | 7328          | ubiquitin-conjugating enzyme E2H (UBC8 homolog, yeast)                                      | 7q32            | Genetic Association                           | 0.55                              | 9.12        | 3.40E-17 | 0.16        | hHC029382 | NM_003344         |
| ASD DATABASE | MBD6        | 114785        | methyl-CpG binding domain protein 6                                                         | -               | Rare single gene variant                      | 0.55                              | 8.69        | 5.92E-16 | 0.14        | hHC020288 | NM_052897         |
| ASD DATABASE | MTHFR       | 4524          | 5,10-methylenetetrahydrofolate reductase (NADPH)                                            | 1p36.3          | Genetic Association                           | 0.54                              | 5.23        | 3.69E-07 | -0.01       | hHC015904 | NM_005957         |
| ASD DATABASE | GPD2        | 2820          | glycerol-3-phosphate dehydrogenase 2 (mitochondrial)                                        | 2q24.1          | Rare single gene variant                      | 0.52                              | 5.73        | 3.11E-08 | 0.01        | hHC030717 | NM_001083112      |
| ASD DATABASE | MBD1        | 4152          | methyl-CpG binding domain protein 1                                                         | 18q21           | Rare Single Gene variant                      | 0.48                              | 9.16        | 2.51E-17 | 0.16        | hHR003120 | NM_015846         |
| ASD DATABASE | TTN         | 7273          | titin                                                                                       | 2q31            | Rare Single Gene variant                      | 0.47                              | 3.87        | 1.39E-04 | -0.06       | hHA035073 | NM_133378         |
| ASD DATABASE | ADSL        | 158           | adenylosuccinate lyase                                                                      | 22q13.1 22q13.2 | Rare Single Gene variant                      | 0.47                              | 11.13       | 2.05E-23 | 0.26        | hHA037287 | NM_000026         |
| ASD DATABASE | PCDHA1      | 56147         | protocadherin alpha 1                                                                       | 5q31            | Rare single gene variant                      | 0.47                              | 7.18        | 8.68E-12 | 0.07        | hHR006046 | NM_018900         |
| ASD DATABASE | MCPH1       | 79648         | microcephalin 1                                                                             | 8p23.1          | Rare Single Gene variant                      | 0.47                              | 5.25        | 3.40E-07 | -0.01       | hHC008828 | NM_024596         |
| ASD DATABASE | MEF2C       | 4208          | myocyte enhancer factor 2C                                                                  | 5q14            | Rare Single Gene variant                      | 0.45                              | 3.85        | 1.50E-04 | -0.06       | hHR007934 | NM_002397         |
| ASD DATABASE | C4BPB       | 725           | complement component 4 binding protein, beta                                                | 1q32            | Genetic Association                           | 0.42                              | 4.57        | 7.95E-06 | -0.04       | hHC022556 | NM_000716         |
| ASD DATABASE | NTRK3       | 4916          | neurotrophic tyrosine kinase, receptor, type 3                                              | 15q25           | Rare Single Gene variant, Genetic Association | 0.41                              | 5.83        | 1.83E-08 | 0.01        | hHC013101 | NM_001012338      |
| ASD DATABASE | NRXN3       | 9369          | neuroligin 3                                                                                | 14q31           | Rare Single Gene variant                      | 0.40                              | 4.04        | 7.22E-05 | -0.06       | hHA036677 | NM_004796         |
| ASD DATABASE | CMIP        | 80790         | c-Maf-inducing protein                                                                      |                 | Genetic Association                           | 0.40                              | 6.04        | 5.95E-09 | 0.02        | hHA039536 | NM_030629         |
| ASD DATABASE | MTF1        | 4520          | metal-regulatory transcription factor 1                                                     | 1p33            | Genetic Association                           | 0.36                              | 5.95        | 9.49E-09 | 0.02        | hHR018133 | NM_005955         |
| ASD DATABASE | RAB19       | 401409        | RAB19, member RAS oncogene family                                                           |                 | Rare single gene variant                      | 0.35                              | 3.62        | 3.63E-04 | -0.07       | hHR012361 | NM_001008749      |
| ASD DATABASE | ADK         | 132           | adenosine kinase                                                                            | 10q22 10q11-q24 | Rare Single Gene variant                      | 0.34                              | 4.71        | 4.30E-06 | -0.03       | hHA038719 | NM_001123         |
| ASD DATABASE | YWHAE       | 7531          | tyrosine 3-monooxygenase/tryptophan 5-monooxygenase activation protein, epsilon polypeptide | 17p13.3         | Rare single gene variant                      | 0.33                              | 5.16        | 5.21E-07 | -0.02       | hHC028280 | NR_024058         |
| ASD DATABASE | PCDGA11     | 56105         | protocadherin gamma subfamily A, 11                                                         |                 | Rare single gene variant                      | 0.33                              | 3.69        | 2.77E-04 | -0.07       | hHA034119 | NM_032091         |
| ASD DATABASE | LAMB1       | 3912          | laminin, beta 1                                                                             | 7q22            | Genetic Association                           | 0.33                              | 3.02        | 2.81E-03 | -0.09       | hHC004268 | NM_002291         |
| ASD DATABASE | HTR3A       | 3359          | 5-hydroxytryptamine (serotonin) receptor 3A                                                 | 11q23.1         | Functional                                    | 0.33                              | 7.23        | 6.61E-12 | 0.07        | hHA040524 | NM_213621         |
| ASD DATABASE | NF1         | 4763          | neurofibromin 1                                                                             | 17q11.2         | Rare Single Gene variant, Genetic Association | 0.32                              | 4.18        | 4.07E-05 | -0.05       | hHC019086 | NM_001042492      |
| ASD DATABASE | TBC1D7      | 51256         | TBC1 domain family, member 7                                                                | 6p24.1          | Functional                                    | 0.28                              | 3.50        | 5.47E-04 | -0.08       | hHA036695 | NM_016495         |
| ASD DATABASE | AVPR1A      | 552           | arginine vasopressin receptor 1A                                                            | 12q14-q15       | Rare Single Gene variant, Genetic Association | 0.27                              | 2.31        | 2.19E-02 | -0.11       | hHC009154 | NM_000706         |
| ASD DATABASE | CHD8        | 57680         | chromodomain helicase DNA binding protein 8                                                 | 14q11.2         | Rare Single Gene variant                      | 0.26                              | 5.23        | 3.66E-07 | -0.01       | hHR011006 | NM_020920         |
| ASD DATABASE | ARHGAP15    | 55843         | Rho GTPase activating protein 15                                                            | 2q22.2          | Rare Single Gene variant                      | 0.26                              | 1.94        | 5.31E-02 | -0.11       | hHC010987 | NM_018460         |
| ASD DATABASE | IL1R2       | 7850          | interleukin 1 receptor, type II                                                             | 2q12-q22        | Rare Single Gene variant                      | 0.26                              | 3.90        | 1.23E-04 | -0.06       | hHA038212 | NM_004633         |
| ASD DATABASE | UBR7        | 55148         | ubiquitin protein ligase E3 component n-recogin 7 (putative)                                | 14q32.12        | Rare Single Gene variant                      | 0.25                              | 4.87        | 2.02E-06 | -0.03       | hHA033800 | NM_175748         |
| ASD DATABASE | KIAA1602    | 57701         | KIAA1602                                                                                    | 12q13.13        | Rare single gene variant                      | 0.25                              | 5.25        | 3.39E-07 | -0.01       | hHR024402 | NM_001037806      |
| ASD DATABASE | RELN        | 5649          | reelin                                                                                      | 7q22            | Genetic Association                           | 0.25                              | 1.83        | 6.86E-02 | -0.12       | hHC004991 | NM_005045         |

Supp Table 1 Gene Sets

| Gene Set     | Gene Symbol | EntrezGene ID | Description                                                                          | Location       | Genetic Evidence                              | Beta Coefficient ("Fetal Effect") | t-statistic | p-value  | Adjusted R2 | Probe ID  | Ref Seq Accession |
|--------------|-------------|---------------|--------------------------------------------------------------------------------------|----------------|-----------------------------------------------|-----------------------------------|-------------|----------|-------------|-----------|-------------------|
| ASD DATABASE | CACNA1G     | 8913          | calcium channel, voltage-dependent, T type, alpha 1G subunit                         | 17q22          | Genetic Association                           | 0.23                              | 2.33        | 2.05E-02 | -0.11       | hHA039581 | NM_198396         |
| ASD DATABASE | TBL1XR1     | 79718         | transducin (beta)-like 1 X-linked receptor 1                                         | 3q26.32        | Rare Single Gene variant                      | 0.22                              | 3.08        | 2.33E-03 | -0.09       | hHC018417 | NM_024665         |
| ASD DATABASE | DRD2        | 1813          | dopamine receptor D2                                                                 | 11q23          | Rare single gene variant                      | 0.22                              | 2.30        | 2.24E-02 | -0.11       | hHA035616 | NM_000795         |
| ASD DATABASE | GABRB3      | 2562          | gamma-aminobutyric acid (GABA) A receptor, beta 3                                    | 15q11.2-q12    | Genetic Association                           | 0.21                              | 2.36        | 1.90E-02 | -0.10       | hHA040248 | NM_021912         |
| ASD DATABASE | CA6         | 765           | carbonic anhydrase VI                                                                | 1p36.2         | Rare Single Gene variant                      | 0.20                              | 3.14        | 1.91E-03 | -0.09       | hHC019151 | NM_001215         |
| ASD DATABASE | PDE4A       | 5141          | phosphodiesterase 4A, cAMP-specific (phosphodiesterase E2 dunce homolog, Drosophila) | 19p13.2        | Functional                                    | 0.17                              | 2.19        | 2.96E-02 | -0.11       | hHA038823 | NM_001111307      |
| ASD DATABASE | NTRK1       | 4914          | neurotrophic tyrosine kinase, receptor, type 1                                       | 1q21-q22       | Rare Single Gene variant                      | 0.15                              | 1.51        | 1.33E-01 | -0.12       | hHC022368 | NM_002529         |
| ASD DATABASE | GRIN2B      | 2904          | glutamate receptor, ionotropic, N-methyl D-aspartate 2B                              | 12p12          | Genetic Association                           | 0.13                              | 2.02        | 4.46E-02 | -0.11       | hHC022772 | NM_000834         |
| ASD DATABASE | GPX1        | 2876          | glutathione peroxidase 1                                                             | 3p21.3         | Genetic Association                           | 0.13                              | 1.15        | 2.50E-01 | -0.12       | hHR012671 | NM_201397         |
| ASD DATABASE | CCDC64      | 92558         | coiled-coil domain containing 64                                                     | 12q24.23       | Genetic Association                           | 0.11                              | 0.90        | 3.67E-01 | -0.13       | hHR014469 | AK129960          |
| ASD DATABASE | CADPS2      | 93664         | Ca <sup>++</sup> -dependent secretion activator 2                                    | 7q31.3         | Rare Single Gene variant                      | 0.10                              | 1.22        | 2.24E-01 | -0.12       | hHA036220 | NM_017954         |
| ASD DATABASE | FOXP1       | 27086         | forkhead box P1                                                                      | 3p14.1         | Rare Single Gene variant                      | 0.10                              | 1.11        | 2.69E-01 | -0.12       | hHC002879 | NM_032682         |
| ASD DATABASE | DMPK        | 1760          | dystrophia myotonia-protein kinase                                                   | 19q13.3        | Genetic Association                           | 0.10                              | 1.26        | 2.10E-01 | -0.12       | hHC016348 | NM_001081563      |
| ASD DATABASE | LRPPRC      | 10128         | leucine-rich PPR-motif containing                                                    | 2p21           | Functional                                    | 0.10                              | 1.82        | 7.02E-02 | -0.12       | hHC010016 | NM_133259         |
| ASD DATABASE | TSC2        | 7249          | tuberous sclerosis 2                                                                 | 16p13.3        | Genetic Association                           | 0.08                              | 1.48        | 1.40E-01 | -0.12       | hHC023736 | NM_000548         |
| ASD DATABASE | CAMTA1      | 23261         | calmodulin binding transcription activator 1                                         | 1p36.31-p36.23 | Rare single gene variant                      | 0.05                              | 0.60        | 5.50E-01 | -0.13       | hHA032936 | NM_015215         |
| ASD DATABASE | MYO1A       | 4640          | myosin IA                                                                            | 12q13-q14      | Rare Single Gene variant                      | 0.04                              | 0.47        | 6.37E-01 | -0.13       | hHC024205 | NM_005379         |
| ASD DATABASE | POT1        | 25913         | POT1 protection of telomeres 1 homolog (S. pombe)                                    | 7q31.33        | Rare single gene variant                      | 0.02                              | 0.27        | 7.89E-01 | -0.13       | hHC003328 | NR_003102         |
| ASD DATABASE | CD44        | 960           | CD44 molecule (Indian blood group)                                                   | 11p13          | Genetic Association                           | 0.00                              | 0.06        | 9.48E-01 | -0.13       | hHA036604 | NM_000610         |
| ASD DATABASE | HOXA1       | 3198          | homeobox A1                                                                          | 7p15.3         | Genetic Association                           | 0.00                              | 0.01        | 9.92E-01 | -0.13       | hHA039747 | NM_005522         |
| ASD DATABASE | MSR1        | 4481          | macrophage scavenger receptor 1                                                      | 8p22           | Rare Single Gene variant                      | 0.00                              | 0.00        | 9.96E-01 | -0.13       | hHA037301 | NM_138715         |
| ASD DATABASE | OXTR        | 5021          | oxytocin receptor                                                                    | 3p25           | Genetic Association                           | -0.01                             | -0.06       | 9.55E-01 | -0.13       | hHR017882 | NM_000916         |
| ASD DATABASE | MDGA2       | 161357        | MAM domain containing glycosylphosphatidylinositol anchor 2                          | 14q21.3        | Genetic Association                           | -0.01                             | -0.08       | 9.34E-01 | -0.13       | hHC004809 | NM_001113498      |
| ASD DATABASE | SYNGAP1     | 8831          | synaptic Ras GTPase activating protein 1 homolog (rat)                               | 6p21.3         | Rare Single Gene variant                      | -0.05                             | -0.57       | 5.67E-01 | -0.13       | hHC014146 | NM_006772         |
| ASD DATABASE | FOXP2       | 93986         | forkhead box P2                                                                      | 7q31           | Rare single gene variant                      | -0.06                             | -0.47       | 6.35E-01 | -0.13       | hHC010005 | NM_148898         |
| ASD DATABASE | AMT         | 275           | aminomethyltransferase                                                               | 3p21.2-p21.1   | Rare single gene variant                      | -0.07                             | -1.25       | 2.12E-01 | -0.12       | hHC025760 | NM_000481         |
| ASD DATABASE | TPO         | 7173          | thyroid peroxidase                                                                   | 2p25           | Genetic association                           | -0.08                             | -1.33       | 1.84E-01 | -0.12       | hHC018189 | NM_000547         |
| ASD DATABASE | PITX1       | 5307          | paired-like homeodomain 1                                                            | 5q31           | Genetic Association                           | -0.09                             | -1.73       | 8.52E-02 | -0.12       | hHC024311 | NM_002653         |
| ASD DATABASE | MBD3        | 53615         | methyl-CpG binding domain protein 3                                                  | 19p13.3        | Rare Single Gene variant, Genetic Association | -0.09                             | -1.36       | 1.75E-01 | -0.12       | hHR026224 | NM_003926         |
| ASD DATABASE | CACNA1D     | 776           | calcium channel, voltage-dependent, L type, alpha 1D subunit                         | 3p14.3         | Functional                                    | -0.11                             | -1.32       | 1.89E-01 | -0.12       | hHC016540 | NM_000720         |
| ASD DATABASE | ADARB1      | 104           | adenosine deaminase, RNA-specific, B1 (RED1 homolog rat)                             | 21q22.3        | Functional                                    | -0.12                             | -1.65       | 1.01E-01 | -0.12       | hHA038018 | NM_001112         |
| ASD DATABASE | AGAP1       | 116987        | ArfGAP with GTPase domain, ankyrin repeat and PH domain 1                            | 2q37           | Rare Single Gene variant, Genetic Association | -0.13                             | -1.37       | 1.73E-01 | -0.12       | hHC021643 | NM_001037131      |
| ASD DATABASE | TYR         | 7299          | tyrosinase (oculocutaneous albinism IA)                                              | 11q14-q21      | Functional                                    | -0.13                             | -2.03       | 4.37E-02 | -0.11       | hHR017154 | NM_000372         |
| ASD DATABASE | CACNA1B     | 774           | calcium channel, voltage-dependent, N type, alpha 1B subunit                         | 9q34           | Genetic association                           | -0.13                             | -2.08       | 3.88E-02 | -0.11       | hHC019378 | NM_000718         |
| ASD DATABASE | HOXB1       | 3211          | homeobox B1                                                                          | 17q21.3        | Genetic Association                           | -0.16                             | -1.89       | 6.00E-02 | -0.11       | hHC024275 | NM_002144         |



Supp Table 1 Gene Sets

| Gene Set     | Gene Symbol | EntrezGene ID | Description                                                                                      | Location     | Genetic Evidence                              | Beta Coefficient ("Fetal Effect") | t-statistic | p-value  | Adjusted R2 | Probe ID  | Ref Seq Accession |
|--------------|-------------|---------------|--------------------------------------------------------------------------------------------------|--------------|-----------------------------------------------|-----------------------------------|-------------|----------|-------------|-----------|-------------------|
| ASD DATABASE | SERPINE1    | 5054          | serpin peptidase inhibitor, clade E (nexin, plasminogen activator inhibitor type 1), member 1    | 7q21.3-q22   | Genetic association                           | -0.18                             | -0.93       | 3.55E-01 | -0.13       | hHR017883 | NM_000602         |
| ASD DATABASE | DNM1L       | 10059         | dynamamin 1-like                                                                                 | 12p11.21     | Functional                                    | -0.20                             | -4.74       | 3.70E-06 | -0.03       | hHA040566 | NM_012062         |
| ASD DATABASE | EN2         | 2020          | engrailed homeobox 2                                                                             | 7q36         | Genetic Association                           | -0.21                             | -1.05       | 2.95E-01 | -0.13       | hHR003567 | NM_001427         |
| ASD DATABASE | ESRRB       | 2103          | estrogen-related receptor beta                                                                   | 14q24.3      | Genetic Association                           | -0.21                             | -3.30       | 1.13E-03 | -0.08       | hHC020118 | NM_004452         |
| ASD DATABASE | TAF1L       | 138474        | TAF1 RNA polymerase II, TATA box binding protein (TBP)-associated factor, 210kDa-like            | 9p21.1       | Rare Single Gene variant                      | -0.22                             | -1.94       | 5.41E-02 | -0.11       | hHC026675 | NM_153809         |
| ASD DATABASE | MTX2        | 10651         | metaxin 2                                                                                        | 2q31.1       | Functional                                    | -0.23                             | -4.48       | 1.14E-05 | -0.04       | hHC004105 | NM_001006635      |
| ASD DATABASE | DRD3        | 1814          | dopamine receptor D3                                                                             | 3q13.3       | Genetic Association                           | -0.24                             | -3.71       | 2.56E-04 | -0.07       | hHC011871 | NM_000796         |
| ASD DATABASE | GAP43       | 2596          | growth associated protein 43                                                                     | 3q13.1-q13.2 | Functional                                    | -0.25                             | -2.73       | 6.91E-03 | -0.10       | hHC021492 | NM_001130064      |
| ASD DATABASE | LZTS2       | 84445         | leucine zipper, putative tumor suppressor 2                                                      | 10q24        | Genetic Association                           | -0.26                             | -4.37       | 1.88E-05 | -0.05       | hHC022109 | NM_032429         |
| ASD DATABASE | MBD4        | 8930          | methyl-CpG binding domain protein 4                                                              | 3q21-q22     | Rare Single Gene variant, Genetic Association | -0.26                             | -5.53       | 8.52E-08 | 0.00        | hHC013517 | NM_003925         |
| ASD DATABASE | CUL3        | 8452          | cullin 3                                                                                         | 2q36.2       | Rare single gene variant                      | -0.27                             | -4.19       | 3.97E-05 | -0.05       | hHC002562 | NM_003590         |
| ASD DATABASE | PARD3B      | 117583        | par-3 partitioning defective 3 homolog B (C. elegans)                                            | 2q33.3       | Genetic association                           | -0.32                             | -5.94       | 1.00E-08 | 0.02        | hHR017747 | NM_152526         |
| ASD DATABASE | SND1        | 27044         | staphylococcal nuclease and tudor domain containing 1                                            | 7q31.3       | Genetic Association                           | -0.32                             | -7.79       | 2.08E-13 | 0.10        | hHC015809 | NM_014390         |
| ASD DATABASE | HTR3C       | 170572        | 5-hydroxytryptamine (serotonin) receptor 3, family member C                                      | 3q27.1       | Genetic Association                           | -0.32                             | -5.72       | 3.12E-08 | 0.01        | hHC012593 | NM_130770         |
| ASD DATABASE | LAMC3       | 10319         | laminin, gamma 3                                                                                 | 9q31-q34     | Rare Single Gene variant                      | -0.34                             | -3.98       | 9.12E-05 | -0.06       | hHC021119 | NM_006059         |
| ASD DATABASE | AR          | 367           | androgen receptor                                                                                | Xq11.2-q12   | Genetic Association                           | -0.38                             | -3.80       | 1.87E-04 | -0.07       | hHC019711 | NM_000044         |
| ASD DATABASE | GSTM1       | 2944          | glutathione S-transferase mu 1                                                                   | 1p13.3       | Genetic Association                           | -0.39                             | -2.45       | 1.51E-02 | -0.10       | hHA033255 | NM_000561         |
| ASD DATABASE | CHST5       | 23563         | carbohydrate (N-acetylglucosamine 6-O) sulfotransferase 5                                        | 16q22.3      | Rare Single Gene variant                      | -0.40                             | -6.55       | 3.47E-10 | 0.04        | hHA034690 | NM_024533         |
| ASD DATABASE | HERC2       | 8924          | hect domain and RLD 2                                                                            | 15q13        | Rare single gene variant                      | -0.40                             | -5.52       | 8.70E-08 | 0.00        | hHC002570 | NM_004667         |
| ASD DATABASE | DLG4        | 1742          | discs, large homolog 4 (Drosophila)                                                              | 17p13.1      | Functional                                    | -0.41                             | -7.50       | 1.27E-12 | 0.09        | hHA040671 | NM_001365         |
| ASD DATABASE | ADRB2       | 154           | adrenergic, beta-2-, receptor, surface                                                           | 5q31-q32     | Genetic Association                           | -0.44                             | -4.72       | 3.96E-06 | -0.03       | hHC010417 | NM_000024         |
| ASD DATABASE | DDX11       | 1663          | DEAD/H (Asp-Glu-Ala-Asp/His) box polypeptide 11 (CHL1-like helicase homolog, S. cerevisiae)      | 12p11        | Genetic Association                           | -0.44                             | -6.64       | 2.10E-10 | 0.05        | hHA033471 | U75968            |
| ASD DATABASE | PER1        | 5187          | period homolog 1 (Drosophila)                                                                    | 17p13.1-p12  | Genetic Association                           | -0.44                             | -5.06       | 8.26E-07 | -0.02       | hHC014060 | NM_002616         |
| ASD DATABASE | PCDHAC2     | 56134         | protocadherin alpha subfamily C, 2                                                               |              | Genetic association                           | -0.45                             | -5.26       | 3.24E-07 | -0.01       | hHA040138 | NM_018899         |
| ASD DATABASE | CDH22       | 64405         | cadherin-like 22                                                                                 | 20q13.1      | Genetic Association                           | -0.45                             | -5.36       | 1.93E-07 | -0.01       | hHC022550 | NM_021248         |
| ASD DATABASE | ADCY5       | 111           | adenylate cyclase 5                                                                              | 3q13.2-q21   | Rare Single Gene variant                      | -0.45                             | -5.80       | 2.13E-08 | 0.01        | hHR020929 | NM_183357         |
| ASD DATABASE | DLX6        | 1750          | distal-less homeobox 6                                                                           | 7q22         | Rare Single Gene variant                      | -0.45                             | -3.92       | 1.18E-04 | -0.06       | hHR004816 | NM_005222         |
| ASD DATABASE | PPP1R1B     | 84152         | protein phosphatase 1, regulatory (inhibitor) subunit 1B                                         | 17q12        | Genetic association                           | -0.46                             | -8.09       | 3.15E-14 | 0.11        | hHA040375 | NM_032192         |
| ASD DATABASE | PDE4B       | 5142          | phosphodiesterase 4B, cAMP-specific (phosphodiesterase E4 dunce homolog, Drosophila)             | 1p31         | Functional                                    | -0.49                             | -7.51       | 1.18E-12 | 0.09        | hHC005298 | NM_001037341      |
| ASD DATABASE | BZRAP1      | 9256          | benzodiazepine receptor (peripheral) associated protein 1                                        | 17q22-q23    | Rare Single Gene variant                      | -0.49                             | -10.51      | 1.84E-21 | 0.23        | hHC025747 | NM_004758         |
| ASD DATABASE | GALNT14     | 79623         | UDP-N-acetyl-alpha-D-galactosamine:polypeptide N-acetylgalactosaminyltransferase 14 (GalNAc-T14) | 2p23.1       | Genetic association                           | -0.53                             | -5.92       | 1.14E-08 | 0.01        | hHC020467 | NM_024572         |
| ASD DATABASE | DNER        | 92737         | delta/notch-like EGF repeat containing                                                           | 2q36.3       | Genetic association                           | -0.54                             | -6.61       | 2.47E-10 | 0.05        | hHC010355 | NM_139072         |
| ASD DATABASE | BCKDK       | 10295         | branched chain ketoacid dehydrogenase kinase                                                     | 16p11.2      | Rare single gene variant                      | -0.56                             | -8.12       | 2.56E-14 | 0.12        | hHA036422 | NM_001122957      |
| ASD DATABASE | PCDHAC1     | 56135         | protocadherin alpha subfamily C, 1                                                               | 5q31         | Genetic association                           | -0.61                             | -7.79       | 2.11E-13 | 0.10        | hHC015008 | NM_018898         |

Supp Table 1 Gene Sets

| Gene Set     | Gene Symbol | EntrezGene ID | Description                                                                                              | Location      | Genetic Evidence               | Beta Coefficient ("Fetal Effect") | t-statistic | p-value  | Adjusted R2 | Probe ID  | Ref Seq Accession |
|--------------|-------------|---------------|----------------------------------------------------------------------------------------------------------|---------------|--------------------------------|-----------------------------------|-------------|----------|-------------|-----------|-------------------|
| ASD DATABASE | LMX1B       | 4010          | LIM homeobox transcription factor 1, beta                                                                |               | Genetic Association            | -0.63                             | -9.42       | 4.08E-18 | 0.18        | hHE040758 | NM_002316         |
| ASD DATABASE | CDH10       | 1008          | cadherin 10, type 2 (T2-cadherin)                                                                        | 5p14-p13      | Genetic Association            | -0.67                             | -8.42       | 3.65E-15 | 0.13        | hHC005100 | NM_006727         |
| ASD DATABASE | FLT1        | 2321          | fms-related tyrosine kinase 1 (vascular endothelial growth factor/vascular permeability factor receptor) | 13q12         | Genetic Association            | -0.68                             | -5.27       | 3.08E-07 | -0.01       | hHC021672 | NM_002019         |
| ASD DATABASE | SLC25A14    | 9016          | solute carrier family 25 (mitochondrial carrier, brain), member 14                                       | Xq24          | Functional                     | -0.72                             | -12.97      | 2.04E-29 | 0.34        | hHC028296 | NM_003951         |
| ASD DATABASE | ARHGAP24    | 83478         | Rho GTPase activating protein 24                                                                         | 4q21.23-q21.3 | Rare single gene variant       | -0.73                             | -15.63      | 2.47E-38 | 0.44        | hHC011396 | NM_001025616      |
| ASD DATABASE | SLC25A27    | 9481          | solute carrier family 25, member 27                                                                      | 6p11.2-q12    | Genetic association/functional | -0.73                             | -9.98       | 8.57E-20 | 0.20        | hHR003234 | NM_004277         |
| ASD DATABASE | TBL1X       | 6907          | transducin (beta)-like 1X-linked                                                                         | Xp22.3        | Genetic Association            | -0.74                             | -9.07       | 4.77E-17 | 0.16        | hHC017932 | NM_005647         |
| ASD DATABASE | PCDH10      | 57575         | protocadherin 10                                                                                         | 4q28.3        | Rare Single Gene variant       | -0.75                             | -10.31      | 7.79E-21 | 0.22        | hHA034716 | NM_020815         |
| ASD DATABASE | NDUFA5      | 4698          | NADH dehydrogenase (ubiquinone) 1 alpha subcomplex, 5, 13kDa                                             | 7q32          | Genetic Association            | -0.78                             | -9.84       | 2.26E-19 | 0.20        | hHR022224 | NM_005000         |
| ASD DATABASE | DDC         | 1644          | dopa decarboxylase (aromatic L-amino acid decarboxylase)                                                 | 7p12.2        | Genetic association            | -0.80                             | -6.86       | 5.83E-11 | 0.06        | hHC005505 | NM_001082971      |
| ASD DATABASE | GALNT13     | 114805        | UDP-N-acetyl-alpha-D-galactosamine:polypeptide N-acetylgalactosaminyltransferase 13 (GalNac-T13)         | 2q23.3-q24.1  | Rare Single Gene variant       | -0.82                             | -11.32      | 5.09E-24 | 0.27        | hHC004472 | NM_052917         |
| ASD DATABASE | ABAT        | 18            | 4-aminobutyrate aminotransferase                                                                         | 16p13.2       | Genetic Association            | -0.83                             | -12.75      | 1.09E-28 | 0.33        | hHR002012 | NM_000663         |
| ASD DATABASE | INPP1       | 3628          | inositol polyphosphate-1-phosphatase                                                                     | 2q32          | Genetic Association            | -0.83                             | -12.89      | 3.60E-29 | 0.34        | hHC010890 | NM_001128928      |
| ASD DATABASE | APBA2       | 321           | amyloid beta (A4) precursor protein-binding, family A, member 2                                          | 15q11-q12     | Rare Single Gene variant       | -0.84                             | -13.15      | 4.87E-30 | 0.35        | hHC002497 | NM_005503         |
| ASD DATABASE | TGM3        | 7053          | transglutaminase 3 (E polypeptide, protein-glutamine-gamma-glutamyltransferase)                          | 20q11.2       | Rare Single Gene variant       | -0.85                             | -10.36      | 5.61E-21 | 0.22        | hHC019588 | NM_003245         |
| ASD DATABASE | LRFN5       | 145581        | leucine rich repeat and fibronectin type III domain containing 5                                         | 14q21.2       | Genetic Association            | -0.86                             | -11.06      | 3.33E-23 | 0.25        | hHC020529 | NM_152447         |
| ASD DATABASE | SLC39A11    | 201266        | solute carrier family 39 (metal ion transporter), member 11                                              | 17q24.3-q25.1 | Genetic association            | -0.87                             | -11.89      | 7.12E-26 | 0.29        | hHC012606 | NM_139177         |
| ASD DATABASE | PCDH15      | 65217         | protocadherin 15                                                                                         |               | Genetic association            | -0.91                             | -12.91      | 3.13E-29 | 0.34        | hHR010523 | NM_001142771      |
| ASD DATABASE | RPP25       | 54913         | ribonuclease P/MRP 25kDa subunit                                                                         | 15q24.1       | Functional                     | -0.95                             | -18.31      | 2.95E-47 | 0.53        | hHC018851 | NM_017793         |
| ASD DATABASE | EGR2        | 1959          | early growth response 2 (Krox-20 homolog, Drosophila)                                                    | 10q21.1       | Genetic Association            | -0.97                             | -5.82       | 1.89E-08 | 0.01        | hHC017547 | NM_000399         |
| ASD DATABASE | CACNA1I     | 8911          | calcium channel, voltage-dependent, T type, alpha 1I subunit                                             | 22q13.1       | Genetic association            | -0.98                             | -10.96      | 6.96E-23 | 0.25        | hHC014460 | NM_021096         |
| ASD DATABASE | HOMER1      | 9456          | homer homolog 1 (Drosophila)                                                                             | 5q14.2        | Rare single gene variant       | -0.98                             | -9.46       | 3.13E-18 | 0.18        | hHC012166 | NM_004272         |
| ASD DATABASE | PEX7        | 5191          | peroxisomal biogenesis factor 7                                                                          | 6q23.3        | Genetic Association            | -1.02                             | -10.43      | 3.24E-21 | 0.23        | hHC002373 | NM_000288         |
| ASD DATABASE | MAPK8IP2    | 23542         | mitogen-activated protein kinase 8 interacting protein 2                                                 | 22q13.33      | Functional                     | -1.04                             | -19.21      | 3.20E-50 | 0.56        | hHC024365 | NM_012324         |
| ASD DATABASE | ALOX5AP     | 241           | arachidonate 5-lipoxygenase-activating protein                                                           | 13q12         | Genetic Association            | -1.12                             | -5.45       | 1.26E-07 | 0.00        | hHC019682 | NM_001629         |
| ASD DATABASE | CD38        | 952           | CD38 molecule                                                                                            | 4p15          | Genetic Association            | -1.16                             | -7.38       | 2.61E-12 | 0.08        | hHC011804 | NM_001775         |
| ASD DATABASE | REEP3       | NA            | receptor accessory protein 3                                                                             | 10q21.3       | Rare single gene variant       | -1.19                             | -11.02      | 4.44E-23 | 0.25        | hHE041048 | BC018658          |
| ASD DATABASE | ADA         | 100           | adenosine deaminase                                                                                      | 20q12-q13.11  | Genetic Association            | -1.21                             | -10.95      | 7.62E-23 | 0.25        | hHC016014 | AK123988          |
| ASD DATABASE | DNAJC19     | 131118        | DnaJ (Hsp40) homolog, subfamily C, member 19                                                             | 3q26.33       | Functional                     | -1.21                             | -16.93      | 1.14E-42 | 0.49        | hHC004483 | NM_145261         |
| ASD DATABASE | BAIAP2      | 10458         | BAI1-associated protein 2                                                                                | 17q25         | Genetic Association            | -1.21                             | -15.92      | 2.65E-39 | 0.45        | hHA036123 | NM_017450         |
| ASD DATABASE | MAPK3       | 5595          | mitogen-activated protein kinase 3                                                                       | 16p11.2       | Rare Single Gene variant       | -1.22                             | -20.77      | 2.91E-55 | 0.60        | hHC016199 | NM_001040056      |
| ASD DATABASE | USP9Y       | 8287          | ubiquitin specific peptidase 9, Y-linked                                                                 | Yq11.2        | Genetic Association            | -1.22                             | -1.97       | 4.99E-02 | -0.11       | hHC008068 | NM_004654         |
| ASD DATABASE | CACNA1F     | 778           | calcium channel, voltage-dependent, L type, alpha 1F subunit                                             | Xp11.23       | Genetic Association            | -1.23                             | -21.57      | 8.09E-58 | 0.62        | hHC022101 | NM_005183         |

Supp Table 1 Gene Sets

| Gene Set     | Gene Symbol | EntrezGene ID | Description                                                                           | Location        | Genetic Evidence               | Beta Coefficient ("Fetal Effect") | t-statistic | p-value  | Adjusted R2 | Probe ID  | Ref Seq Accession |
|--------------|-------------|---------------|---------------------------------------------------------------------------------------|-----------------|--------------------------------|-----------------------------------|-------------|----------|-------------|-----------|-------------------|
| ASD DATABASE | LRP2        | 4036          | low density lipoprotein-related protein 2                                             | 2q24-q31        | Rare single gene variant       | -1.24                             | -7.92       | 9.38E-14 | 0.11        | hHC010917 | NM_004525         |
| ASD DATABASE | C3orf58     | 205428        | chromosome 3 open reading frame 58                                                    | 3q24            | Rare Single Gene variant       | -1.29                             | -15.26      | 4.41E-37 | 0.43        | hHC007820 | NM_173552         |
| ASD DATABASE | TDO2        | 6999          | tryptophan 2,3-dioxygenase                                                            | 4q31-q32        | Genetic Association            | -1.33                             | -9.84       | 2.17E-19 | 0.20        | hHC006104 | NM_005651         |
| ASD DATABASE | STK39       | 27347         | serine threonine kinase 39 (STE20/SPS1 homolog, yeast)                                | 2q24.3          | Genetic Association            | -1.34                             | -19.27      | 2.09E-50 | 0.56        | hHC006733 | NM_013233         |
| ASD DATABASE | BRUNOL4     | 56853         | bruno-like 4, RNA binding protein (Drosophila)                                        |                 | Functional                     | -1.34                             | -18.40      | 1.43E-47 | 0.53        | hHE041886 | NM_020180         |
| ASD DATABASE | PTGS2       | 5743          | prostaglandin-endoperoxide synthase 2 (prostaglandin G/H synthase and cyclooxygenase) | 1q25.2-q25.3    | Genetic Association            | -1.38                             | -7.07       | 1.74E-11 | 0.07        | hHR007248 | NM_000963         |
| ASD DATABASE | NOS2        | 4843          | nitric oxide synthase 2, inducible                                                    | 17q11.2-q12     | Genetic Association            | -1.45                             | -14.89      | 7.86E-36 | 0.42        | hHC030645 | NM_000625         |
| ASD DATABASE | ATP10A      | 57194         | ATPase, class V, type 10A                                                             | 15q11.2         | Genetic Association            | -1.50                             | -10.73      | 3.76E-22 | 0.24        | hHC013443 | NM_024490         |
| ASD DATABASE | CNTNAP5     | 129684        | contactin associated protein-like 5                                                   | 2q14.3          | Genetic Association            | -1.55                             | -13.90      | 1.54E-32 | 0.38        | hHR010052 | NM_130773         |
| ASD DATABASE | SCN2A       | 6326          | sodium channel, voltage-gated, type II, alpha subunit                                 | 2q23-q24        | Rare Single Gene variant       | -1.58                             | -20.89      | 1.20E-55 | 0.60        | hHC014396 | NM_021007         |
| ASD DATABASE | SLC22A15    | 55356         | solute carrier family 22, member 15                                                   | 1p13.1          | Genetic association            | -1.65                             | -18.47      | 8.39E-48 | 0.54        | hHC006443 | NM_018420         |
| ASD DATABASE | GRM8        | 2918          | glutamate receptor, metabotropic 8                                                    | 7q31.3-q32.1    | Genetic Association            | -1.66                             | -16.47      | 3.83E-41 | 0.47        | hHC019914 | NM_001127323      |
| ASD DATABASE | ASS1        | 445           | argininosuccinate synthetase 1                                                        | 9q34.1          | Genetic Association            | -1.71                             | -18.84      | 5.12E-49 | 0.55        | hHC030607 | NM_000050         |
| ASD DATABASE | PTPRC       | 5788          | protein tyrosine phosphatase, receptor type, C                                        | 1q31-q32        | Genetic Association            | -1.74                             | -10.58      | 1.13E-21 | 0.23        | hHC002057 | NM_002838         |
| ASD DATABASE | MKL2        | 57496         | MKL/myocardin-like 2                                                                  | 16p13.12        | Genetic Association            | -1.97                             | -28.21      | 1.02E-77 | 0.74        | hHC012802 | NM_014048         |
| ASD DATABASE | ATP2B2      | 491           | ATPase, Ca++ transporting, plasma membrane 2                                          | 3p25.3          | Genetic Association            | -2.02                             | -23.71      | 1.69E-64 | 0.66        | hHC001957 | NM_001001331      |
| ASD DATABASE | ZBTB16      | 7704          | zinc finger and BTB domain containing 16                                              | 11q23.1         | Genetic association            | -2.10                             | -23.54      | 5.86E-64 | 0.66        | hHC017436 | NM_006006         |
| ASD DATABASE | GABRA4      | 2557          | gamma-aminobutyric acid (GABA) A receptor, alpha 4                                    | 4p12            | Genetic Association            | -2.26                             | -18.08      | 1.73E-46 | 0.52        | hHC002869 | NM_000809         |
| ASD DATABASE | FOLH1       | 2346          | folate hydrolase (prostate-specific membrane antigen) 1                               | 11p11.2         | Functional                     | -2.29                             | -11.48      | 1.49E-24 | 0.27        | hHR028477 | NM_004476         |
| ASD DATABASE | SYT17       | 51760         | synaptotagmin XVII                                                                    | 16p12.3         | Genetic Association            | -2.35                             | -24.20      | 5.52E-66 | 0.67        | hHC019342 | NM_016524         |
| ASD DATABASE | CDH8        | 1006          | cadherin 8, type 2                                                                    | 16q22.1         | Rare Single Gene variant       | -2.59                             | -22.06      | 2.25E-59 | 0.63        | hHC009663 | NM_001796         |
| ASD DATABASE | MET         | 4233          | met proto-oncogene (hepatocyte growth factor receptor)                                | 7q31            | Genetic Association            | -2.86                             | -16.24      | 2.21E-40 | 0.46        | hHR003121 | NM_001127500      |
| ASD DATABASE | PAH         | 5053          | phenylalanine hydroxylase                                                             | 12q22-q24.2     | Rare single gene variant       | -2.90                             | -19.08      | 8.66E-50 | 0.55        | hHC005995 | NM_000277         |
| ASD DATABASE | PRKCB       | 5579          | protein kinase C, beta                                                                | 16p11.2         | Genetic Association            | -3.02                             | -29.72      | 6.74E-82 | 0.76        | hHC021733 | NM_002738         |
| ASD DATABASE | NEFL        | 4747          | neurofilament, light polypeptide                                                      | 8p21            | Genetic association/functional | -3.43                             | -25.34      | 2.15E-69 | 0.70        | hHC005656 | NM_006158         |
| ASD DATABASE | CDH9        | 1007          | cadherin 9, type 2 (T1-cadherin)                                                      | 5p14            | Genetic Association            | -3.45                             | -27.28      | 4.67E-75 | 0.73        | hHC005099 | NM_016279         |
| BPAD GWAS    | AK5         | 26289         | adenylate kinase 5                                                                    | 1p31            | GWAS                           | 0.33                              | 3.76        | 2.17E-04 | -0.07       | hHA035503 | NM_012093         |
| BPAD GWAS    | ALAS1       | 211           | aminolevulinatase, delta-, synthase 1                                                 | 3p21.1          | GWAS                           | 0.33                              | 6.42        | 7.35E-10 | 0.04        | hHA037941 | NM_000688         |
| BPAD GWAS    | ANK3        | 288           | ankyrin 3, node of Ranvier (ankyrin G)                                                | 10q21           | GWAS                           | 2.42                              | 22.94       | 4.18E-62 | 0.65        | hHA034365 | NM_020987         |
| BPAD GWAS    | BRMS1       | 25855         | breast cancer metastasis suppressor 1                                                 | 11q13-q13.2     | GWAS                           | 0.53                              | 7.86        | 1.36E-13 | 0.10        | hHC022165 | NM_015399         |
| BPAD GWAS    | CACNA1C     | 775           | calcium channel, voltage-dependent, L type, alpha 1C subunit                          |                 | GWAS                           | 0.45                              | 4.55        | 8.60E-06 | -0.04       | hHA037564 | NM_001129840      |
| BPAD GWAS    | CCS         | 9973          | copper chaperone for superoxide dismutase                                             | 11q13           | GWAS                           | 0.25                              | 4.85        | 2.23E-06 | -0.03       | hHC021118 | NM_005125         |
| BPAD GWAS    | CNNM4       | 26504         | cyclin M4                                                                             | 2p12-p11.2      | GWAS                           | 0.40                              | 5.13        | 6.13E-07 | -0.02       | hHC003338 | NM_020184         |
| BPAD GWAS    | DDX23       | 9416          | DEAD (Asp-Glu-Ala-Asp) box polypeptide 23                                             | 12q13.12        | GWAS                           | 0.63                              | 6.96        | 3.22E-11 | 0.06        | hHR025792 | NM_004818         |
| BPAD GWAS    | DGKH        | 160851        | diacylglycerol kinase, eta                                                            |                 | GWAS                           | 0.01                              | 0.07        | 9.45E-01 | -0.13       | hHR027242 | BC044822          |
| BPAD GWAS    | DPP3        | 10072         | dipeptidyl-peptidase 3                                                                | 11q12-q13.1     | GWAS                           | 0.63                              | 6.15        | 3.18E-09 | 0.03        | hHR013854 | NM_130443         |
| BPAD GWAS    | FAM83E      | 54854         | family with sequence similarity 83, member E                                          | 19q13.32-q13.33 | GWAS                           | 0.01                              | 0.22        | 8.26E-01 | -0.13       | hHC025861 | NM_017708         |
| BPAD GWAS    | FSTL5       | 56884         | folliculin-like 5                                                                     | 4q32.3          | GWAS                           | 0.61                              | 5.95        | 9.73E-09 | 0.02        | hHC008371 | NM_020116         |

Supp Table 1 Gene Sets

| Gene Set  | Gene Symbol | EntrezGene ID | Description                                                      | Location     | Genetic Evidence | Beta Coefficient ("Fetal Effect") | t-statistic | p-value   | Adjusted R2 | Probe ID  | Ref Seq Accession |
|-----------|-------------|---------------|------------------------------------------------------------------|--------------|------------------|-----------------------------------|-------------|-----------|-------------|-----------|-------------------|
| BPAD GWAS | FUBP1       | 8880          | far upstream element (FUSE) binding protein 1                    | 1p31.1       | GWAS             | 1.86                              | 29.54       | 2.08E-81  | 0.76        | hHC011066 | AB209366          |
| BPAD GWAS | GLT8D1      | 55830         | glycosyltransferase 8 domain containing 1                        | 3p21.1       | GWAS             | 0.52                              | 9.52        | 2.18E-18  | 0.18        | hHC017657 | NM_001010983      |
| BPAD GWAS | GPR20       | 2843          | G protein-coupled receptor 20                                    | 8q24.2-q24.3 | GWAS             | 0.29                              | 4.53        | 9.23E-06  | -0.04       | hHR010856 | NM_005293         |
| BPAD GWAS | ITIH1       | 3697          | inter-alpha (globulin) inhibitor H1                              | 3p21.2-p21.1 | GWAS             | 0.01                              | 0.11        | 9.16E-01  | -0.13       | hHC022349 | NM_002215         |
| BPAD GWAS | LMAN2L      | 81562         | lectin, mannose-binding 2-like                                   | 2q11.2       | GWAS             | 0.59                              | 8.16        | 1.96E-14  | 0.12        | hHC012128 | NM_001142292      |
| BPAD GWAS | LMBR1L      | 55716         | limb region 1 homolog (mouse)-like                               | 12q13.12     | GWAS             | 1.33                              | 26.01       | 2.27E-71  | 0.71        | hHC022245 | NM_018113         |
| BPAD GWAS | LRFN4       | 78999         | leucine rich repeat and fibronectin type III domain containing 4 | 11q13.1      | GWAS             | 0.32                              | 5.08        | 7.50E-07  | -0.02       | hHC021087 | NM_024036         |
| BPAD GWAS | LYG1        | 129530        | lysozyme G-like 1                                                | 2q11.2       | GWAS             | 0.57                              | 4.50        | 1.07E-05  | -0.04       | hHC009312 | NM_174898         |
| BPAD GWAS | MAPK10      | 5602          | mitogen-activated protein kinase 10                              | 4q22.1-q23   | GWAS             | 0.08                              | 0.86        | 3.91E-01  | -0.13       | hHA032930 | AK294125          |
| BPAD GWAS | MGC27382    | NA            | hypothetical MGC27382                                            | 1p31.1       | GWAS             | 0.09                              | 1.18        | 2.38E-01  | -0.12       | hHC013898 | AK091757          |
| BPAD GWAS | MITD1       | 129531        | MIT, microtubule interacting and transport, domain containing 1  | 2q11.2       | GWAS             | 0.58                              | 10.25       | 1.19E-20  | 0.22        | hHC014516 | NM_138798         |
| BPAD GWAS | MLL2        | 8085          | myeloid/lymphoid or mixed-lineage leukemia 2                     |              | GWAS             | 0.83                              | 8.98        | 8.71E-17  | 0.16        | hHE041849 | NM_003482         |
| BPAD GWAS | MRPL11      | 65003         | mitochondrial ribosomal protein L11                              | 11q13.3      | GWAS             | 0.59                              | 5.17        | 4.99E-07  | -0.02       | hHA035129 | NM_170739         |
| BPAD GWAS | MRPL30      | 51263         | mitochondrial ribosomal protein L30                              | 2q11.2       | GWAS             | 0.26                              | 4.21        | 3.62E-05  | -0.05       | hHR024911 | NM_145212         |
| BPAD GWAS | NCAN        | 1463          | neurocan                                                         | 19p12        | GWAS             | 1.30                              | 15.11       | 1.36E-36  | 0.42        | hHC008161 | NM_004386         |
| BPAD GWAS | NEK4        | 6787          | NIMA (never in mitosis gene a)-related kinase 4                  | 3p21.1       | GWAS             | 0.40                              | 7.44        | 1.88E-12  | 0.08        | hHC006908 | NM_003157         |
| BPAD GWAS | NFIX        | 4784          | nuclear factor I/X (CCAAT-binding transcription factor)          | 19p13.3      | GWAS             | 0.09                              | 2.23        | 2.65E-02  | -0.11       | hHA040029 | AK295290          |
| BPAD GWAS | NPAS4       | 266743        | neuronal PAS domain protein 4                                    | 11q13        | GWAS             | 0.04                              | 0.54        | 5.89E-01  | -0.13       | hHA037215 | NM_178864         |
| BPAD GWAS | NT5DC2      | 64943         | 5'-nucleotidase domain containing 2                              | 3p21.1       | GWAS             | 1.62                              | 17.99       | 3.39E-46  | 0.52        | hHC024330 | NM_022908         |
| BPAD GWAS | NUDT1       | 4521          | nudix (nucleoside diphosphate linked moiety X)-type motif 1      | 7p22         | GWAS             | 1.27                              | 19.68       | 9.29E-52  | 0.57        | hHC024103 | NM_198949         |
| BPAD GWAS | ODZ4        | 26011         | odz, odd Oz/ten-m homolog 4 (Drosophila)                         | 11q14.1      | GWAS             | 0.74                              | 6.92        | 4.23E-11  | 0.06        | hHC008608 | NM_001098816      |
| BPAD GWAS | PACS1       | 55690         | phosphofurin acidic cluster sorting protein 1                    | 11q13.1      | GWAS             | 0.10                              | 1.83        | 6.89E-02  | -0.12       | hHC016796 | NM_018026         |
| BPAD GWAS | PBRM1       | 55193         | polybromo 1                                                      | 3p21         | GWAS             | 2.25                              | 42.58       | 5.14E-113 | 0.87        | hHC007983 | NM_018313         |
| BPAD GWAS | PHF7        | 51533         | PHD finger protein 7                                             | 3p21.1       | GWAS             | 0.22                              | 2.72        | 7.03E-03  | -0.10       | hHC012761 | NM_016483         |
| BPAD GWAS | PLK1        | 5347          | polo-like kinase 1 (Drosophila)                                  | 16p12.1      | GWAS             | 0.11                              | 2.02        | 4.42E-02  | -0.11       | hHR026450 | NM_005030         |
| BPAD GWAS | PTGFR       | 5737          | prostaglandin F receptor (FP)                                    | 1p31.1       | GWAS             | 1.08                              | 8.00        | 5.47E-14  | 0.11        | hHC002159 | NM_001039585      |
| BPAD GWAS | RAB1B       | 81876         | RAB1B, member RAS oncogene family                                | 11q12        | GWAS             | 0.39                              | 6.18        | 2.76E-09  | 0.03        | hHA033303 | NM_030981         |
| BPAD GWAS | RBM14       | 10432         | RNA binding motif protein 14                                     |              | GWAS             | 1.52                              | 13.31       | 1.48E-30  | 0.35        | hHC002778 | NM_006328         |
| BPAD GWAS | RBM4        | 5936          | RNA binding motif protein 4                                      | 11q13        | GWAS             | 2.17                              | 38.34       | 1.38E-103 | 0.84        | hHA033137 | NM_002896         |
| BPAD GWAS | RBM4B       | 83759         | RNA binding motif protein 4B                                     | 11q13        | GWAS             | 1.15                              | 21.36       | 3.72E-57  | 0.61        | hHC026961 | NM_031492         |
| BPAD GWAS | RCE1        | 9986          | RCE1 homolog, prenyl protein peptidase (S. cerevisiae)           | 11q13        | GWAS             | 1.15                              | 18.66       | 2.10E-48  | 0.54        | hHC014793 | NM_005133         |
| BPAD GWAS | REV1        | 51455         | REV1 homolog (S. cerevisiae)                                     | 2q11.1-q11.2 | GWAS             | 1.11                              | 14.39       | 3.68E-34  | 0.40        | hHC004303 | NM_016316         |
| BPAD GWAS | RFT1        | 91869         | RFT1 homolog (S. cerevisiae)                                     |              | GWAS             | 0.34                              | 4.68        | 4.73E-06  | -0.03       | hHR013631 | NM_052859         |
| BPAD GWAS | RPL18       | 6141          | ribosomal protein L18                                            | 19q13        | GWAS             | 0.67                              | 9.58        | 1.43E-18  | 0.18        | hHR029076 | NM_000979         |
| BPAD GWAS | SF3B2       | 10992         | splicing factor 3b, subunit 2, 145kDa                            | 11q13.1      | GWAS             | 0.02                              | 0.43        | 6.68E-01  | -0.13       | hHC011819 | NM_006842         |
| BPAD GWAS | SFMBT1      | 51460         | Scm-like with four mbt domains 1                                 | 3p21.1       | GWAS             | 0.49                              | 7.89        | 1.08E-13  | 0.10        | hHC019969 | NM_001005159      |
| BPAD GWAS | SH3PXD2A    | 9644          | SH3 and PX domains 2A                                            | 10q24.33     | GWAS             | 0.09                              | 1.21        | 2.29E-01  | -0.12       | hHC020707 | NM_014631         |
| BPAD GWAS | SLC29A2     | 3177          | solute carrier family 29 (nucleoside transporters), member 2     | 11q13        | GWAS             | 0.13                              | 2.47        | 1.42E-02  | -0.10       | hHC019291 | NM_001532         |
| BPAD GWAS | SYNE1       | 23345         | spectrin repeat containing, nuclear envelope 1                   | 6q25         | GWAS             | 0.69                              | 5.34        | 2.23E-07  | -0.01       | hHA033917 | NM_133650         |

Supp Table 1 Gene Sets

| Gene Set  | Gene Symbol | EntrezGene ID | Description                                                                    | Location      | Genetic Evidence | Beta Coefficient ("Fetal Effect") | t-statistic | p-value   | Adjusted R2 | Probe ID  | Ref Seq Accession |
|-----------|-------------|---------------|--------------------------------------------------------------------------------|---------------|------------------|-----------------------------------|-------------|-----------|-------------|-----------|-------------------|
| BPAD GWAS | TLR9        | 54106         | toll-like receptor 9                                                           | 3p21.3        | GWAS             | 0.07                              | 1.23        | 2.19E-01  | -0.12       | hHA039914 | NM_017442         |
| BPAD GWAS | TRIM9       | 114088        | tripartite motif-containing 9                                                  | 14q22.1       | GWAS             | 0.09                              | 1.09        | 2.75E-01  | -0.13       | hHA037601 | NM_015163         |
| BPAD GWAS | TUBA1A      | 7846          | tubulin, alpha 1a                                                              | 12q12-q14.3   | GWAS             | 0.75                              | 11.21       | 1.12E-23  | 0.26        | hHC025916 | NM_006009         |
| BPAD GWAS | USP33       | 23032         | ubiquitin specific peptidase 33                                                | 1p31.1        | GWAS             | 1.00                              | 8.21        | 1.46E-14  | 0.12        | hHA033914 | NM_201626         |
| BPAD GWAS | WDR82       | 80335         | WD repeat domain 82                                                            | 3p21.1        | GWAS             | 0.82                              | 17.15       | 2.11E-43  | 0.50        | hHC025830 | NM_025222         |
| BPAD GWAS | ZMIZ1       | 57178         | zinc finger, MIZ-type containing 1                                             | 10q22.3       | GWAS             | 1.96                              | 28.57       | 1.03E-78  | 0.75        | hHC003709 | NM_020338         |
| BPAD GWAS | ZZZ3        | 26009         | zinc finger, ZZ-type containing 3                                              | 1p31.1        | GWAS             | 0.42                              | 7.15        | 1.09E-11  | 0.07        | hHC005208 | NM_015534         |
| BPAD GWAS | B3GNT1      | 11041         | UDP-GlcNAc:betaGal beta-1,3-N-acetylglucosaminyltransferase 1                  | 11q13.1       | GWAS             | -2.12                             | -23.82      | 8.16E-65  | 0.67        | hHC006616 | NM_006876         |
| BPAD GWAS | BAP1        | 8314          | BRCA1 associated protein-1 (ubiquitin carboxy-terminal hydrolase)              | 3p21.31-p21.2 | GWAS             | -0.52                             | -8.90       | 1.49E-16  | 0.15        | hHC018424 | NM_004656         |
| BPAD GWAS | BBS1        | 582           | Bardet-Biedl syndrome 1                                                        | 11q13.1       | GWAS             | -0.18                             | -2.95       | 3.46E-03  | -0.09       | hHC010268 | NM_024649         |
| BPAD GWAS | C2orf55     | 343990        | chromosome 2 open reading frame 55                                             | 2q11.2        | GWAS             | -4.72                             | -45.96      | 4.80E-120 | 0.89        | hHC013040 | NM_207362         |
| BPAD GWAS | CA11        | 770           | carbonic anhydrase XI                                                          | 19q13.3       | GWAS             | -2.77                             | -33.89      | 7.40E-93  | 0.81        | hHC020247 | NM_001217         |
| BPAD GWAS | CACNA1D     | 776           | calcium channel, voltage-dependent, L type, alpha 1D subunit                   | 3p14.3        | GWAS             | -0.11                             | -1.32       | 1.89E-01  | -0.12       | hHC016540 | NM_000720         |
| BPAD GWAS | CACNB3      | 784           | calcium channel, voltage-dependent, beta 3 subunit                             | 12q13         | GWAS             | -0.01                             | -0.21       | 8.34E-01  | -0.13       | hHC016238 | NM_000725         |
| BPAD GWAS | CCDC87      | 55231         | coiled-coil domain containing 87                                               | 11q13.1       | GWAS             | -1.34                             | -11.53      | 1.01E-24  | 0.28        | hHC008764 | NM_018219         |
| BPAD GWAS | CHDH        | 55349         | choline dehydrogenase                                                          | 3p21.1        | GWAS             | -1.14                             | -12.28      | 3.71E-27  | 0.31        | hHC013130 | NM_018397         |
| BPAD GWAS | CNIH2       | 254263        | cornichon homolog 2 (Drosophila)                                               | 11q13.1       | GWAS             | -0.10                             | -1.21       | 2.29E-01  | -0.12       | hHC026434 | NM_182553         |
| BPAD GWAS | DBP         | 1628          | D site of albumin promoter (albumin D-box) binding protein                     | 19q13.3       | GWAS             | -1.42                             | -16.59      | 1.53E-41  | 0.48        | hHC024359 | NM_001352         |
| BPAD GWAS | DDN         | 23109         | dendrin                                                                        | 12q13.12      | GWAS             | -2.08                             | -20.06      | 5.29E-53  | 0.58        | hHC022008 | NM_015086         |
| BPAD GWAS | DHH         | 50846         | desert hedgehog homolog (Drosophila)                                           | 12q12-q13.1   | GWAS             | -0.12                             | -1.53       | 1.27E-01  | -0.12       | hHC014677 | NM_021044         |
| BPAD GWAS | DNAH1       | 25981         | dynein, axonemal, heavy chain 1                                                |               | GWAS             | -1.91                             | -16.91      | 1.26E-42  | 0.49        | hHR017783 | NM_015512         |
| BPAD GWAS | DNAJB4      | 11080         | DnaJ (Hsp40) homolog, subfamily B, member 4                                    | 1p31.1        | GWAS             | -0.72                             | -9.00       | 7.34E-17  | 0.16        | hHC002810 | NM_007034         |
| BPAD GWAS | EIF5B       | 9669          | eukaryotic translation initiation factor 5B                                    | 2q11.2        | GWAS             | -0.01                             | -0.17       | 8.66E-01  | -0.13       | hHC001642 | NM_015904         |
| BPAD GWAS | FAM73A      | 374986        | family with sequence similarity 73, member A                                   | 1p31.1        | GWAS             | -1.57                             | -16.93      | 1.11E-42  | 0.49        | hHC001773 | NM_198549         |
| BPAD GWAS | FER1L5      | 90342         | fer-1-like 5 (C. elegans)                                                      |               | GWAS             | -0.02                             | -0.26       | 7.98E-01  | -0.13       | hHR016466 | NM_001113382      |
| BPAD GWAS | FGF21       | 26291         | fibroblast growth factor 21                                                    | 19q13.1-qter  | GWAS             | -0.13                             | -2.09       | 3.75E-02  | -0.11       | hHC024366 | NM_019113         |
| BPAD GWAS | FTSJ2       | 29960         | FtsJ homolog 2 (E. coli)                                                       | 7p22          | GWAS             | -0.02                             | -0.40       | 6.90E-01  | -0.13       | hHC010873 | NM_013393         |
| BPAD GWAS | FUT1        | 2523          | fucosyltransferase 1 (galactoside 2-alpha-L-fucosyltransferase, H blood group) | 19q13.3       | GWAS             | -0.78                             | -8.32       | 6.97E-15  | 0.12        | hHC012990 | NM_000148         |
| BPAD GWAS | FUT2        | 2524          | fucosyltransferase 2 (secretor status included)                                | 19q13.3       | GWAS             | -0.47                             | -8.05       | 3.90E-14  | 0.11        | hHR018998 | NM_000511         |
| BPAD GWAS | GAL3ST3     | 89792         | galactose-3-O-sulfotransferase 3                                               | 11q13.1       | GWAS             | -0.24                             | -4.11       | 5.48E-05  | -0.06       | hHC016890 | NM_033036         |
| BPAD GWAS | GLYCK       | 132158        | glycerate kinase                                                               | 3p21.1        | GWAS             | -0.32                             | -7.18       | 8.79E-12  | 0.07        | hHC018008 | NM_145262         |
| BPAD GWAS | GNL3        | 26354         | guanine nucleotide binding protein-like 3 (nucleolar)                          | 3p21.1        | GWAS             | -0.06                             | -0.50       | 6.15E-01  | -0.13       | hHA040707 | NM_206825         |
| BPAD GWAS | ITIH3       | 3699          | inter-alpha (globulin) inhibitor H3                                            | 3p21.2-p21.1  | GWAS             | -0.19                             | -2.38       | 1.79E-02  | -0.10       | hHC025527 | NM_002217         |
| BPAD GWAS | ITIH4       | 3700          | inter-alpha (globulin) inhibitor H4 (plasma Kallikrein-sensitive glycoprotein) | 3p21-p14      | GWAS             | -0.59                             | -9.22       | 1.67E-17  | 0.17        | hHC024955 | NM_002218         |
| BPAD GWAS | IZUMO1      | 284359        | izumo sperm-egg fusion 1                                                       | 19q13.33      | GWAS             | -1.06                             | -9.51       | 2.24E-18  | 0.18        | hHC021500 | NM_182575         |
| BPAD GWAS | KLC2        | 64837         | kinesin light chain 2                                                          | 11q13.1       | GWAS             | -0.41                             | -8.03       | 4.55E-14  | 0.11        | hHC023734 | NM_001134775      |
| BPAD GWAS | LBA1        | 9881          | lupus brain antigen 1                                                          | 3p22.2        | GWAS             | -0.43                             | -5.23       | 3.65E-07  | -0.01       | hHR016901 | NM_014831         |
| BPAD GWAS | LIPT1       | 51601         | lipoyltransferase 1                                                            | 2q11.2        | GWAS             | -0.41                             | -4.09       | 5.99E-05  | -0.06       | hHA034041 | NM_145197         |

Supp Table 1 Gene Sets

| Gene Set  | Gene Symbol | EntrezGene ID | Description                                                                            | Location      | Genetic Evidence | Beta Coefficient ("Fetal Effect") | t-statistic | p-value   | Adjusted R2 | Probe ID  | Ref Seq Accession |
|-----------|-------------|---------------|----------------------------------------------------------------------------------------|---------------|------------------|-----------------------------------|-------------|-----------|-------------|-----------|-------------------|
| BPAD GWAS | MAD1L1      | 8379          | MAD1 mitotic arrest deficient-like 1 (yeast)                                           | 7p22          | GWAS             | -0.67                             | -9.84       | 2.22E-19  | 0.20        | hHR019802 | NM_003550         |
| BPAD GWAS | MGAT4A      | 11320         | mannosyl (alpha-1,3-)-glycoprotein beta-1,4-N-acetylglucosaminyltransferase, isozyme A | 2q12          | GWAS             | -0.79                             | -9.20       | 1.97E-17  | 0.17        | hHC020284 | NM_012214         |
| BPAD GWAS | MUSTN1      | 389125        | musculoskeletal, embryonic nuclear protein 1                                           | 3p21.1        | GWAS             | -2.05                             | -13.74      | 5.32E-32  | 0.37        | hHC019519 | NM_205853         |
| BPAD GWAS | NISCH       | 11188         | nischarin                                                                              | 3p21.1        | GWAS             | -0.46                             | -6.97       | 3.17E-11  | 0.06        | hHC014499 | NM_007184         |
| BPAD GWAS | NEXN        | 91624         | nexilin (F actin binding protein)                                                      | 1p31.1        | GWAS             | -0.71                             | -5.02       | 1.01E-06  | -0.02       | hHA035504 | NM_144573         |
| BPAD GWAS | NGF         | 4803          | nerve growth factor (beta polypeptide)                                                 | 1p13.1        | GWAS             | -0.16                             | -2.01       | 4.52E-02  | -0.11       | hHC009122 | NM_002506         |
| BPAD GWAS | NTN5        | 126147        | netrin 5                                                                               | 19q13.33      | GWAS             | -1.29                             | -15.00      | 3.37E-36  | 0.42        | hHC001505 | NM_145807         |
| BPAD GWAS | PC          | 5091          | pyruvate carboxylase                                                                   | 11q13.4-q13.5 | GWAS             | -1.27                             | -19.63      | 1.34E-51  | 0.57        | hHC009859 | NM_001040716      |
| BPAD GWAS | PELI3       | 246330        | pellino homolog 3 (Drosophila)                                                         | 11q13.1       | GWAS             | -2.30                             | -30.01      | 1.11E-82  | 0.76        | hHC015800 | NM_145065         |
| BPAD GWAS | PPM1M       | 132160        | protein phosphatase 1M (PP2C domain containing)                                        | 3p21.1        | GWAS             | -0.42                             | -4.50       | 1.07E-05  | -0.04       | hHC011132 | NM_144641         |
| BPAD GWAS | PRKAG1      | 5571          | protein kinase, AMP-activated, gamma 1 non-catalytic subunit                           | 12q12-q14     | GWAS             | -0.55                             | -10.00      | 7.26E-20  | 0.20        | hHC003989 | NM_212461         |
| BPAD GWAS | PRKCD       | 5580          | protein kinase C, delta                                                                | 3p21.31       | GWAS             | -1.86                             | -16.95      | 9.47E-43  | 0.49        | hHC009892 | NM_006254         |
| BPAD GWAS | PTPRT       | 11122         | protein tyrosine phosphatase, receptor type, T                                         | 20q12-q13     | GWAS             | -1.81                             | -19.43      | 6.29E-51  | 0.56        | hHC008506 | NM_133170         |
| BPAD GWAS | RASIP1      | 54922         | Ras interacting protein 1                                                              | 19q13.33      | GWAS             | -1.20                             | -14.71      | 2.98E-35  | 0.41        | hHC005312 | NM_017805         |
| BPAD GWAS | RHEBL1      | 121268        | Ras homolog enriched in brain like 1                                                   | 12q13.12      | GWAS             | -1.58                             | -17.30      | 6.67E-44  | 0.50        | hHC024613 | NM_144593         |
| BPAD GWAS | RIN1        | 9610          | Ras and Rab interactor 1                                                               | 11q13.1       | GWAS             | -1.95                             | -26.11      | 1.12E-71  | 0.71        | hHC023969 | NM_004292         |
| BPAD GWAS | RND1        | 27289         | Rho family GTPase 1                                                                    | 12q12-q13     | GWAS             | -0.46                             | -5.74       | 2.91E-08  | 0.01        | hHC023788 | NM_014470         |
| BPAD GWAS | SEMA3G      | 56920         | sema domain, immunoglobulin domain (Ig), short basic domain, secreted, (semaphorin) 3G | 3p21.1        | GWAS             | -0.92                             | -6.78       | 9.72E-11  | 0.05        | hHC010991 | NM_020163         |
| BPAD GWAS | SPCS1       | 28972         | signal peptidase complex subunit 1 homolog (S. cerevisiae)                             | 3p21.1        | GWAS             | -0.73                             | -12.08      | 1.66E-26  | 0.30        | hHC009782 | NM_014041         |
| BPAD GWAS | SPHK2       | NA            | sphingosine kinase 2                                                                   | 19q13.2       | GWAS             | -0.62                             | -11.71      | 2.76E-25  | 0.28        | hHC026145 | NM_020126         |
| BPAD GWAS | SPRED1      | 161742        | sprouty-related, EVH1 domain containing 1                                              | 15q14         | GWAS             | -0.46                             | -6.00       | 7.22E-09  | 0.02        | hHC009720 | NM_152594         |
| BPAD GWAS | SPTBN2      | 6712          | spectrin, beta, non-erythrocytic 2                                                     | 11q13         | GWAS             | -0.22                             | -4.09       | 5.93E-05  | -0.06       | hHC021077 | NM_006946         |
| BPAD GWAS | STAB1       | 23166         | stabilin 1                                                                             | 3p21.1        | GWAS             | -0.06                             | -0.75       | 4.56E-01  | -0.13       | hHC025154 | NM_015136         |
| BPAD GWAS | STK39       | 27347         | serine threonine kinase 39 (STE20/SPS1 homolog, yeast)                                 | 2q24.3        | GWAS             | -1.34                             | -19.27      | 2.09E-50  | 0.56        | hHC006733 | NM_013233         |
| BPAD GWAS | SYT12       | 91683         | synaptotagmin XII                                                                      | 11q13.1       | GWAS             | -1.36                             | -16.68      | 7.49E-42  | 0.48        | hHC023402 | NM_177963         |
| BPAD GWAS | TMEM151A    | 256472        | transmembrane protein 151A                                                             | 11q13.1       | GWAS             | -1.64                             | -21.69      | 3.22E-58  | 0.62        | hHC023557 | NM_153266         |
| BPAD GWAS | TNNC1       | 7134          | troponin C type 1 (slow)                                                               | 3p21.3-p14.3  | GWAS             | -0.27                             | -3.06       | 2.51E-03  | -0.09       | hHC020672 | NM_003280         |
| BPAD GWAS | TNR         | 7143          | tenascin R (restrictin, janusin)                                                       | 1q24          | GWAS             | -0.17                             | -2.34       | 2.03E-02  | -0.11       | hHC015964 | NM_003285         |
| BPAD GWAS | TSGA10      | 80705         | testis specific, 10                                                                    | 2q11.2        | GWAS             | -1.20                             | -8.72       | 5.01E-16  | 0.14        | hHC009599 | NM_025244         |
| BPAD GWAS | TUBA1B      | 10376         | tubulin, alpha 1b                                                                      | 12q13.12      | GWAS             | -0.37                             | -7.07       | 1.77E-11  | 0.07        | hHR029243 | NM_006082         |
| BPAD GWAS | TWF2        | 11344         | twinfilin, actin-binding protein, homolog 2 (Drosophila)                               | 3p21.1        | GWAS             | -0.33                             | -7.41       | 2.26E-12  | 0.08        | hHC020722 | NM_007284         |
| BPAD GWAS | TXNDC9      | 10190         | thioredoxin domain containing 9                                                        | 2q11.2        | GWAS             | -0.07                             | -1.23       | 2.19E-01  | -0.12       | hHC002433 | NM_005783         |
| BPAD GWAS | YIF1A       | 10897         | Yip1 interacting factor homolog A (S. cerevisiae)                                      | 11q13         | GWAS             | -0.65                             | -11.99      | 3.34E-26  | 0.30        | hHC023148 | NM_020470         |
| BPAD GWAS | ZDHHC24     | 254359        | zinc finger, DHHC-type containing 24                                                   | 11q13.1       | GWAS             | -1.55                             | -24.06      | 1.44E-65  | 0.67        | hHC018753 | NM_207340         |
| ID        | DCX         | 1641          | doublecortin                                                                           | Xq22.3-q23    |                  | 4.28                              | 40.18       | 8.85E-108 | 0.86        | hHC004157 | NM_000555         |
| ID        | FOXP1       | 2290          | forkhead box G1                                                                        |               |                  | 2.81                              | 35.69       | 2.62E-97  | 0.82        | hHC007076 | NM_005249         |
| ID        | ZNF711      | 7552          | zinc finger protein 711                                                                | Xq21.1-q21.2  |                  | 2.14                              | 18.43       | 1.15E-47  | 0.54        | hHC007660 | NM_021998         |
| ID        | AFF2        | 2334          | AF4/FMR2 family, member 2                                                              | Xq28          |                  | 2.34                              | 26.87       | 6.79E-74  | 0.72        | hHC005898 | NM_002025         |
| ID        | BCOR        | 54880         | BCL6 co-repressor                                                                      | Xp21.2-p11.4  |                  | 2.25                              | 20.73       | 3.74E-55  | 0.60        | hHA033656 | AB046795          |

Supp Table 1 Gene Sets

| Gene Set | Gene Symbol | EntrezGene ID | Description                                                                           | Location     | Genetic Evidence | Beta Coefficient ("Fetal Effect") | t-statistic | p-value  | Adjusted R2 | Probe ID  | Ref Seq Accession |
|----------|-------------|---------------|---------------------------------------------------------------------------------------|--------------|------------------|-----------------------------------|-------------|----------|-------------|-----------|-------------------|
| ID       | MID1        | 4281          | midline 1 (Opitz/BBB syndrome)                                                        | Xp22         |                  | 2.11                              | 21.07       | 3.17E-56 | 0.61        | hHR002515 | NM_000381         |
| ID       | GRIK2       | 2898          | glutamate receptor, ionotropic, kainate 2                                             | 6q16.3-q21   |                  | 1.76                              | 22.53       | 7.68E-61 | 0.64        | hHC019020 | NM_175768         |
| ID       | PRSS12      | 8492          | protease, serine, 12 (neurotrypsin, motopsin)                                         | 4q28.1       |                  | 1.55                              | 11.40       | 2.73E-24 | 0.27        | hHC015067 | NM_003619         |
| ID       | ZEB2        | 9839          | zinc finger E-box binding homeobox 2                                                  | 2q22.3       |                  | 1.50                              | 15.51       | 6.50E-38 | 0.44        | hHR029739 | NM_014795         |
| ID       | CASK        | 8573          | calcium/calmodulin-dependent serine protein kinase (MAGUK family)                     | Xp11.4       |                  | 1.58                              | 15.94       | 2.28E-39 | 0.45        | hHR002782 | NM_003688         |
| ID       | PHF6        | 84295         | PHD finger protein 6                                                                  | Xq26.3       |                  | 1.53                              | 24.92       | 3.68E-68 | 0.69        | hHR002178 | NM_032458         |
| ID       | NRXN1       | 9378          | neurexin 1                                                                            | 2p16.3       |                  | 1.31                              | 14.33       | 6.02E-34 | 0.39        | hHA035283 | NM_001135659      |
| ID       | ATRX        | 546           | alpha thalassemia/mental retardation syndrome X-linked (RAD54 homolog, S. cerevisiae) | Xq13.1-q21.1 |                  | 1.10                              | 10.75       | 3.29E-22 | 0.24        | hHC031675 | NM_000489         |
| ID       | ZC3H14      | 79882         | zinc finger CCCH-type containing 14                                                   | 14q31.3      |                  | 1.35                              | 15.99       | 1.58E-39 | 0.46        | hHA035687 | NM_024824         |
| ID       | SOBP        | 55084         | sine oculis binding protein homolog (Drosophila)                                      | 6q21         |                  | 1.20                              | 14.01       | 6.70E-33 | 0.38        | hHC010973 | NM_018013         |
| ID       | ST3GAL3     | 6487          | ST3 beta-galactoside alpha-2,3-sialyltransferase 3                                    | 1p34.1       |                  | 0.03                              | 0.42        | 6.75E-01 | -0.13       | hHC011729 | NM_174963         |
| ID       | UBE2A       | 7319          | ubiquitin-conjugating enzyme E2A (RAD6 homolog)                                       | Xq24-q25     |                  | 0.97                              | 9.70        | 5.85E-19 | 0.19        | hHA034036 | NM_181777         |
| ID       | CUL4B       | 8450          | cullin 4B                                                                             | Xq23         |                  | 1.03                              | 17.06       | 4.11E-43 | 0.49        | hHR004728 | NM_003588         |
| ID       | UPF3B       | 65109         | UPF3 regulator of nonsense transcripts homolog B (yeast)                              | Xq25-q26     |                  | 1.10                              | 19.36       | 1.03E-50 | 0.56        | hHC025870 | NM_080632         |
| ID       | BRWD3       | 254065        | bromodomain and WD repeat domain containing 3                                         | Xq21.1       |                  | 0.87                              | 8.48        | 2.51E-15 | 0.13        | hHC011183 | NM_153252         |
| ID       | AP4B1       | 10717         | adaptor-related protein complex 4, beta 1 subunit                                     | 1p13.2       |                  | 0.96                              | 18.28       | 3.73E-47 | 0.53        | hHC019207 | NM_006594         |
| ID       | ZNF81       | 347344        | zinc finger protein 81                                                                | Xp11.23      |                  | 0.92                              | 11.05       | 3.72E-23 | 0.25        | hHR008276 | NM_007137         |
| ID       | TUSC3       | 7991          | tumor suppressor candidate 3                                                          | 8p22         |                  | 1.00                              | 13.96       | 1.02E-32 | 0.38        | hHC024693 | NM_006765         |
| ID       | RAI1        | 10743         | retinoic acid induced 1                                                               | 17p11.2      |                  | 0.99                              | 15.41       | 1.40E-37 | 0.44        | hHC011816 | NM_030665         |
| ID       | VLDLR       | NA            | very low density lipoprotein receptor                                                 | 9p24         |                  | 1.45                              | 14.53       | 1.25E-34 | 0.40        | hHA035290 | NM_003383         |
| ID       | UBE3A       | 7337          | ubiquitin protein ligase E3A                                                          | 15q11-q13    |                  | 0.71                              | 6.01        | 7.11E-09 | 0.02        | hHA033034 | NM_130839         |
| ID       | AP4M1       | 9179          | adaptor-related protein complex 4, mu 1 subunit                                       | 7q22.1       |                  | 0.81                              | 12.80       | 7.22E-29 | 0.33        | hHR012502 | NM_004722         |
| ID       | TCF4        | 6925          | transcription factor 4                                                                | 18q21.1      |                  | 0.80                              | 12.62       | 2.92E-28 | 0.32        | hHC020459 | NM_001083962      |
| ID       | FTSJ1       | 24140         | FtsJ homolog 1 (E. coli)                                                              | Xp11.23      |                  | 0.75                              | 15.25       | 4.79E-37 | 0.43        | hHC013601 | NM_177439         |
| ID       | QCRL        | 4952          | oculocerebrorenal syndrome of Lowe                                                    | Xq25-q26.1   |                  | 0.73                              | 13.77       | 4.22E-32 | 0.37        | hCT001285 | NM_000276         |
| ID       | SLC16A2     | 6567          | solute carrier family 16, member 2 (monocarboxylic acid transporter 8)                | Xq13.2       |                  | 0.87                              | 14.11       | 3.27E-33 | 0.39        | hHC009198 | NM_006517         |
| ID       | OFD1        | 8481          | oral-facial-digital syndrome 1                                                        | Xp22         |                  | 0.73                              | 11.02       | 4.47E-23 | 0.25        | hHC027610 | NM_003611         |
| ID       | NSDHL       | 50814         | NAD(P) dependent steroid dehydrogenase-like                                           | Xq28         |                  | 0.48                              | 4.49        | 1.11E-05 | -0.04       | hHC008330 | AK026549          |
| ID       | DLG3        | 1741          | discs, large homolog 3 (Drosophila)                                                   | Xq13.1       |                  | 0.67                              | 8.25        | 1.07E-14 | 0.12        | hHA034468 | NM_020730         |
| ID       | SLC9A6      | 10479         | solute carrier family 9 (sodium/hydrogen exchanger), member 6                         | Xq26.3       |                  | 0.31                              | 3.20        | 1.56E-03 | -0.08       | hHA036834 | NM_001042537      |
| ID       | OPHN1       | 4983          | oligophrenin 1                                                                        | Xq12         |                  | 0.58                              | 6.06        | 5.34E-09 | 0.02        | hHC002925 | NM_002547         |
| ID       | HSD17B10    | 3028          | hydroxysteroid (17-beta) dehydrogenase 10                                             | Xp11.2       |                  | 0.43                              | 8.44        | 3.10E-15 | 0.13        | hHC024075 | NM_004493         |
| ID       | MECP2       | 4204          | methyl CpG binding protein 2 (Rett syndrome)                                          | Xq28         |                  | 0.36                              | 3.15        | 1.86E-03 | -0.09       | hHA035057 | NM_004992         |
| ID       | FLNA        | 2316          | filamin A, alpha (actin binding protein 280)                                          | Xq28         |                  | 0.53                              | 7.42        | 2.05E-12 | 0.08        | hHC016668 | NM_001110556      |
| ID       | ERLIN2      | 11160         | ER lipid raft associated 2                                                            | 8p11.2       |                  | 0.51                              | 6.52        | 4.21E-10 | 0.04        | hHA037813 | NM_007175         |
| ID       | CRBN        | 51185         | cereblon                                                                              | 3p26.3       |                  | 0.30                              | 4.65        | 5.57E-06 | -0.04       | hHA036013 | NM_016302         |

Supp Table 1 Gene Sets

| Gene Set | Gene Symbol | EntrezGene ID | Description                                                      | Location           | Genetic Evidence | Beta Coefficient ("Fetal Effect") | t-statistic | p-value  | Adjusted R2 | Probe ID  | Ref Seq Accession |
|----------|-------------|---------------|------------------------------------------------------------------|--------------------|------------------|-----------------------------------|-------------|----------|-------------|-----------|-------------------|
| ID       | ARX         | 170302        | aristaless related homeobox                                      | Xp21               |                  | 0.21                              | 3.19        | 1.62E-03 | -0.08       | hHC020322 | NM_139058         |
| ID       | SHROOM4     | 57477         | shroom family member 4                                           | Xp11.22            |                  | 0.29                              | 1.96        | 5.09E-02 | -0.11       | hHC015016 | NM_020717         |
| ID       | AP152       | 8905          | adaptor-related protein complex 1, sigma 2 subunit               | Xp22.2             |                  | 0.32                              | 4.39        | 1.70E-05 | -0.05       | hHR009633 | NM_003916         |
| ID       | FOXP1       | 27086         | forkhead box P1                                                  | 3p14.1             |                  | 0.10                              | 1.11        | 2.69E-01 | -0.12       | hHC002879 | NM_032682         |
| ID       | MEF2C       | 4208          | myocyte enhancer factor 2C                                       | 5q14               |                  | 0.45                              | 3.85        | 1.50E-04 | -0.06       | hHR007934 | NM_002397         |
| ID       | ZNF41       | 7592          | zinc finger protein 41                                           | Xp11.23            |                  | 0.31                              | 4.17        | 4.22E-05 | -0.05       | hHC007289 | NM_007130         |
| ID       | PCDH19      | 57526         | protocadherin 19                                                 | Xq13.3             |                  | 0.28                              | 3.12        | 2.01E-03 | -0.09       | hHC004670 | NM_001105243      |
| ID       | HUWE1       | 10075         | HECT, UBA and WWE domain containing 1                            | Xp11.22            |                  | 0.24                              | 3.27        | 1.24E-03 | -0.08       | hHR001757 | NM_031407         |
| ID       | PHF8        | 23133         | PHD finger protein 8                                             | Xp11.22            |                  | 0.19                              | 3.35        | 9.49E-04 | -0.08       | hHC005894 | NM_015107         |
| ID       | GRIA3       | 2892          | glutamate receptor, ionotropic, AMPA 3                           | Xq25-q26           |                  | 0.12                              | 1.48        | 1.39E-01 | -0.12       | hHA033134 | NM_007325         |
| ID       | CDKL5       | 6792          | cyclin-dependent kinase-like 5                                   | Xp22               |                  | 0.13                              | 1.57        | 1.18E-01 | -0.12       | hHC018635 | NM_003159         |
| ID       | MED12       | 9968          | mediator complex subunit 12                                      | Xq13               |                  | 0.13                              | 3.58        | 4.13E-04 | -0.07       | hHC023972 | NM_005120         |
| ID       | ACSL4       | 2182          | acyl-CoA synthetase long-chain family member 4                   | Xq22.3-q23         |                  | 0.02                              | 0.16        | 8.69E-01 | -0.13       | hHA034712 | NM_022977         |
| ID       | PQBP1       | 10084         | polyglutamine binding protein 1                                  | Xp11.23            |                  | 0.04                              | 0.98        | 3.29E-01 | -0.13       | hHC024350 | NM_005710         |
| ID       | ZNF526      | 116115        | zinc finger protein 526                                          | 19q13.2            |                  | 0.08                              | 1.39        | 1.65E-01 | -0.12       | hHC025378 | NM_133444         |
| ID       | SRPX2       | 27286         | sushi-repeat-containing protein, X-linked 2                      | Xq21.33-q23        |                  | 0.17                              | 2.08        | 3.85E-02 | -0.11       | hHC012279 | NM_014467         |
| ID       | MAN1B1      | 11253         | mannosidase, alpha, class 1B, member 1                           | 9q34               |                  | 0.03                              | 0.57        | 5.71E-01 | -0.13       | hHC022873 | NM_016219         |
| ID       | CDH15       | 1013          | cadherin 15, type 1, M-cadherin (myotubule)                      | 16q24.3            |                  | 0.16                              | 1.43        | 1.55E-01 | -0.12       | hHC019200 | NM_004933         |
| ID       | NHS         | 4810          | Nance-Horan syndrome (congenital cataracts and dental anomalies) | Xp22.13            |                  | 0.03                              | 0.31        | 7.54E-01 | -0.13       | hHC007570 | NM_198270         |
| ID       | MAGT1       | 84061         | magnesium transporter 1                                          | Xq21.1             |                  | -0.87                             | -9.21       | 1.74E-17 | 0.17        | hHC031167 | NM_032121         |
| ID       | ZDHH9       | 51114         | zinc finger, DHHC-type containing 9                              | Xq26.1             |                  | -0.11                             | -1.10       | 2.73E-01 | -0.13       | hHC012373 | NM_016032         |
| ID       | PAK3        | 5063          | p21 protein (Cdc42/Rac)-activated kinase 3                       | Xq22.3             |                  | 0.00                              | -0.08       | 9.34E-01 | -0.13       | hHC020632 | NM_002578         |
| ID       | RPS6KA3     | 6197          | ribosomal protein S6 kinase, 90kDa, polypeptide 3                | Xp22.2-p22.1       |                  | -0.17                             | -3.14       | 1.91E-03 | -0.09       | hHC016215 | NM_004586         |
| ID       | FMR1        | 2332          | fragile X mental retardation 1                                   | Xq27.3             |                  | -0.15                             | -2.98       | 3.15E-03 | -0.09       | hHC006309 | NM_002024         |
| ID       | GDI1        | 2664          | GDP dissociation inhibitor 1                                     | Xq28               |                  | -0.10                             | -1.53       | 1.27E-01 | -0.12       | hHC017813 | NM_001493         |
| ID       | SYNGAP1     | 8831          | synaptic Ras GTPase activating protein 1 homolog (rat)           | 6p21.3             |                  | -0.05                             | -0.57       | 5.67E-01 | -0.13       | hHC014146 | NM_006772         |
| ID       | CC2D1A      | 54862         | coiled-coil and C2 domain containing 1A                          | 19p13.12           |                  | -0.23                             | -4.92       | 1.65E-06 | -0.03       | hHC024755 | AF536205          |
| ID       | IQSEC2      | 23096         | IQ motif and Sec7 domain 2                                       | Xp11.22            |                  | -0.32                             | -5.00       | 1.11E-06 | -0.02       | hHC019479 | NM_001111125      |
| ID       | PTCHD1      | 139411        | patched domain containing 1                                      | Xp22.11            |                  | -0.31                             | -3.19       | 1.61E-03 | -0.08       | hHC004792 | NM_173495         |
| ID       | RAB39B      | 116442        | RAB39B, member RAS oncogene family                               | Xq28               |                  | -0.33                             | -5.51       | 9.31E-08 | 0.00        | hHC004780 | NM_171998         |
| ID       | DYNC1H1     | 1778          | dynein, cytoplasmic 1, heavy chain 1                             | 14q32.3-qter 14q32 |                  | -0.45                             | -6.91       | 4.46E-11 | 0.06        | hHR011150 | NM_001376         |
| ID       | AP4S1       | 11154         | adaptor-related protein complex 4, sigma 1 subunit               | 14q12              |                  | -0.53                             | -8.63       | 9.09E-16 | 0.14        | hHC017225 | NM_007077         |
| ID       | ATP6AP2     | 10159         | ATPase, H+ transporting, lysosomal accessory protein 2           | Xp11.4             |                  | -0.60                             | -10.51      | 1.82E-21 | 0.23        | hHC031215 | NM_005765         |
| ID       | CNTNAP2     | 26047         | contactin associated protein-like 2                              | 7q35-q36           |                  | -1.05                             | -6.98       | 3.01E-11 | 0.06        | hHC008609 | NM_014141         |
| ID       | TRAPP9      | 83696         | trafficking protein particle complex 9                           | 8q24.3             |                  | -0.71                             | -13.29      | 1.74E-30 | 0.35        | hHC021094 | NM_031466         |
| ID       | PRPS1       | 5631          | phosphoribosyl pyrophosphate synthetase 1                        | Xq21.32-q24        |                  | -0.91                             | -18.09      | 1.57E-46 | 0.52        | hHC023493 | NM_002764         |
| ID       | CA8         | 767           | carbonic anhydrase VIII                                          | 8q11-q12           |                  | -0.83                             | -8.66       | 7.48E-16 | 0.14        | hHC011745 | NM_004056         |
| ID       | STXBP1      | 6812          | syntaxin binding protein 1                                       | 9q34.1             |                  | -1.08                             | -16.32      | 1.24E-40 | 0.47        | hHA037879 | NM_003165         |
| ID       | ARHGEF9     | 23229         | Cdc42 guanine nucleotide exchange factor (GEF) 9                 | Xq11.1             |                  | -1.14                             | -18.43      | 1.20E-47 | 0.54        | hHC009004 | NM_015185         |



Supp Table 1 Gene Sets

| Gene Set          | Gene Symbol | EntrezGene ID | Description                                                                | Location        | Genetic Evidence                  | Beta Coefficient ("Fetal Effect") | t-statistic | p-value  | Adjusted R2 | Probe ID  | Ref Seq Accession |
|-------------------|-------------|---------------|----------------------------------------------------------------------------|-----------------|-----------------------------------|-----------------------------------|-------------|----------|-------------|-----------|-------------------|
| ID                | HCCS        | 3052          | holocytochrome c synthase (cytochrome c heme-lyase)                        | Xp22.3          |                                   | -0.97                             | -17.57      | 8.49E-45 | 0.51        | hHC007513 | NM_005333         |
| ID                | SLC6A8      | 6535          | solute carrier family 6 (neurotransmitter transporter, creatine), member 8 | Xq28            |                                   | -1.15                             | -17.03      | 5.18E-43 | 0.49        | hHR029029 | NM_005629         |
| ID                | ARHGEF6     | 9459          | Rac/Cdc42 guanine nucleotide exchange factor (GEF) 6                       | Xq26.3          |                                   | -1.17                             | -15.87      | 4.06E-39 | 0.45        | hHC007361 | NM_004840         |
| ID                | IL1RAPL1    | 11141         | interleukin 1 receptor accessory protein-like 1                            | Xp22.1-p21.3    |                                   | -1.16                             | -16.10      | 6.47E-40 | 0.46        | hHC014183 | AJ243874          |
| ID                | SYN1        | 6853          | synapsin I                                                                 | Xp11.23         |                                   | -1.35                             | -15.31      | 2.90E-37 | 0.43        | hHC023953 | NM_006950         |
| ID                | TSPAN7      | 7102          | tetraspanin 7                                                              | Xp11.4          |                                   | -1.99                             | -26.84      | 8.25E-74 | 0.72        | hHC005367 | NM_004615         |
| ID                | SYP         | 6855          | synaptophysin                                                              | Xp11.23-p11.22  |                                   | -2.22                             | -29.72      | 6.79E-82 | 0.76        | hHC023248 | NM_003179         |
| ID                | PLP1        | 5354          | proteolipid protein 1                                                      | Xq22            |                                   | -4.47                             | -22.11      | 1.61E-59 | 0.63        | hHA036342 | NM_001128834      |
| Neurodegenerative | ABCA7       | 10347         | ATP-binding cassette, sub-family A (ABC1), member 7                        | 19p13.3         | GWAS                              | 0.31                              | 3.33        | 1.01E-03 | -0.08       | hHA038953 | NM_019112         |
| Neurodegenerative | ANG         | 283           | angiogenin, ribonuclease, RNase A family, 5                                | 14q11.1-q11.2   |                                   | 0.28                              | 6.68        | 1.69E-10 | 0.05        | hHA038640 | NM_001145         |
| Neurodegenerative | APP         | 351           | amyloid beta (A4) precursor protein                                        | 21q21.2 21q21.3 | "Mendelian" Gene                  | 0.96                              | 11.91       | 6.16E-26 | 0.29        | hCT001336 | NM_000484         |
| Neurodegenerative | BST1        | 683           | bone marrow stromal cell antigen 1                                         | 4p15            | GWAS                              | 0.29                              | 3.13        | 1.95E-03 | -0.09       | hHC006909 | NM_004334         |
| Neurodegenerative | C9orf72     | 203228        | chromosome 9 open reading frame 72                                         | 9p21.2          | GWAS                              | 1.22                              | 13.73       | 5.83E-32 | 0.37        | hHA034733 | NM_018325         |
| Neurodegenerative | CCDC62      | 84660         | coiled-coil domain containing 62                                           | 12q24.31        | GWAS                              | 0.42                              | 4.60        | 6.81E-06 | -0.04       | hHA034710 | NM_201435         |
| Neurodegenerative | CD2AP       | 23607         | CD2-associated protein                                                     | 6p12            | GWAS                              | 1.32                              | 20.76       | 3.11E-55 | 0.60        | hHC007088 | NM_012120         |
| Neurodegenerative | CLEC16A     | 23274         | C-type lectin domain family 16, member A                                   | 16p13.13        | GWAS                              | 0.44                              | 8.10        | 2.98E-14 | 0.11        | hHC009748 | NM_015226         |
| Neurodegenerative | FUS         | 2521          | fusion (involved in t(12;16) in malignant liposarcoma)                     | 16p11.2         | "Mendelian" Gene                  | 0.65                              | 12.88       | 3.97E-29 | 0.33        | hHC024724 | NM_004960         |
| Neurodegenerative | HTT         | 3064          | huntingtin                                                                 | 4p16.3          | "Mendelian" Gene/Linkage Analysis | 0.15                              | 2.40        | 1.70E-02 | -0.10       | hHC016403 | NM_002111         |
| Neurodegenerative | MAPT        | 4137          | microtubule-associated protein tau                                         | 17q21.1         | "Mendelian" Gene/Linkage Analysis | 0.67                              | 8.69        | 6.14E-16 | 0.14        | hHR012346 | NM_001123066      |
| Neurodegenerative | MCCC1       | 56922         | methylcrotonoyl-Coenzyme A carboxylase 1 (alpha)                           | 3q27            | GWAS                              | 0.01                              | 0.24        | 8.07E-01 | -0.13       | hHC004347 | NM_020166         |
| Neurodegenerative | PICALM      | 8301          | phosphatidylinositol binding clathrin assembly protein                     | 11q14           | GWAS                              | 0.04                              | 0.60        | 5.50E-01 | -0.13       | hHC003477 | NM_007166         |
| Neurodegenerative | PSEN1       | 5663          | presenilin 1                                                               | 14q24.3         | "Mendelian" Gene                  | 0.21                              | 2.48        | 1.39E-02 | -0.10       | hHA037604 | NM_000021         |
| Neurodegenerative | TARDBP      | 23435         | TAR DNA binding protein                                                    | 1p36.22         | "Mendelian" Gene                  | 0.34                              | 5.67        | 4.23E-08 | 0.00        | hHR007838 | NM_007375         |
| Neurodegenerative | AHI1        | 54806         | Abelson helper integration site 1                                          | 6q23.3          | GWAS                              | -1.06                             | -14.54      | 1.13E-34 | 0.40        | hHR010594 | NM_001134831      |
| Neurodegenerative | APOE        | 348           | apolipoprotein E                                                           | 19q13.2         | "Mendelian" Gene/Linkage Analysis | -2.54                             | -18.34      | 2.35E-47 | 0.53        | hHC024278 | NM_000041         |
| Neurodegenerative | BIN1        | 274           | bridging integrator 1                                                      | 2q14            | GWAS                              | -1.44                             | -22.62      | 3.91E-61 | 0.64        | hHC021831 | NM_139343         |
| Neurodegenerative | CD226       | 10666         | CD226 molecule                                                             | 18q22.3         | GWAS                              | -0.25                             | -1.58       | 1.15E-01 | -0.12       | hHC006609 | NM_006566         |
| Neurodegenerative | CD33        | 945           | CD33 molecule                                                              | 19q13.3         | GWAS                              | -0.70                             | -9.63       | 9.73E-19 | 0.19        | hHC026914 | NM_001772         |
| Neurodegenerative | CD5         | 921           | CD5 molecule                                                               | 11q13           | GWAS                              | -0.06                             | -0.88       | 3.79E-01 | -0.13       | hHC015713 | NM_014207         |
| Neurodegenerative | CHMP2B      | 25978         | chromatin modifying protein 2B                                             | 3p11.2          | "Mendelian" Gene/Linkage Analysis | -0.51                             | -8.23       | 1.24E-14 | 0.12        | hHC003076 | NM_014043         |
| Neurodegenerative | CLU         | 1191          | clusterin                                                                  | 8p21-p12        | GWAS                              | -1.68                             | -23.69      | 1.94E-64 | 0.66        | hHC017231 | NM_203339         |
| Neurodegenerative | CR1         | 1378          | complement component (3b/4b) receptor 1 (Knops blood group)                | 1q32            | GWAS                              | -0.04                             | -0.46       | 6.45E-01 | -0.13       | hHA033522 | NM_000651         |
| Neurodegenerative | EIF4G1      | 1981          | eukaryotic translation initiation factor 4 gamma, 1                        | 3q27-qter       | "Mendelian" Gene/Linkage Analysis | -0.17                             | -1.83       | 6.81E-02 | -0.11       | hHA039850 | D12686            |
| Neurodegenerative | EVI5        | 7813          | ecotropic viral integration site 5                                         | 1p22.1          | GWAS                              | -0.60                             | -10.18      | 2.02E-20 | 0.21        | hHC006925 | NM_005665         |
| Neurodegenerative | GAK         | 2580          | cyclin G associated kinase                                                 | 4p16            | GWAS                              | -0.47                             | -8.43       | 3.32E-15 | 0.13        | hHC015505 | NM_005255         |
| Neurodegenerative | GBA         | 2629          | glucosidase, beta; acid (includes glucosylceramidase)                      | 1q21            | GWAS                              | -1.54                             | -21.61      | 5.82E-58 | 0.62        | hHR023044 | NM_001005749      |
| Neurodegenerative | GPNMB       | 10457         | glycoprotein (transmembrane) nmb                                           | 7p15            | GWAS                              | -0.33                             | -1.78       | 7.63E-02 | -0.12       | hHA035795 | NM_001005340      |

Supp Table 1 Gene Sets

| Gene Set          | Gene Symbol | EntrezGene ID | Description                                                           | Location         | Genetic Evidence                  | Beta Coefficient ("Fetal Effect") | t-statistic | p-value  | Adjusted R2 | Probe ID  | Ref Seq Accession |
|-------------------|-------------|---------------|-----------------------------------------------------------------------|------------------|-----------------------------------|-----------------------------------|-------------|----------|-------------|-----------|-------------------|
| Neurodegenerative | GRN         | 2896          | granulin                                                              | 17q21.32         | "Mendelian" Gene/Linkage Analysis | -0.66                             | -8.48       | 2.38E-15 | 0.13        | hHC020152 | NM_002087         |
| Neurodegenerative | IL7R        | 3575          | interleukin 7 receptor                                                | 5p13             | "Mendelian" Gene/Linkage Analysis | -1.16                             | -7.04       | 2.01E-11 | 0.06        | hHC010514 | AL713738          |
| Neurodegenerative | LRRK2       | 120892        | leucine-rich repeat kinase 2                                          | 12q12            | "Mendelian" Gene/Linkage Analysis | -2.56                             | -30.72      | 1.33E-84 | 0.77        | hHC001998 | NM_198578         |
| Neurodegenerative | MS4A6A      | 64231         | membrane-spanning 4-domains, subfamily A, member 6A                   | 11q12.1          | GWAS                              | -0.38                             | -2.72       | 6.95E-03 | -0.10       | hHA039975 | NM_022349         |
| Neurodegenerative | OPTN        | 10133         | optineurin                                                            | 10p13            | "Mendelian" Gene/Linkage Analysis | -0.97                             | -15.14      | 1.11E-36 | 0.43        | hHC006197 | NM_001008211      |
| Neurodegenerative | PARK7       | 11315         | Parkinson disease (autosomal recessive, early onset) 7                | 1p36.23          | "Mendelian" Gene/Linkage Analysis | -0.28                             | -5.28       | 2.88E-07 | -0.01       | hHC020515 | NM_007262         |
| Neurodegenerative | PINK1       | 65018         | PTEN induced putative kinase 1                                        | 1p36             | "Mendelian" Gene/Linkage Analysis | -2.22                             | -32.69      | 8.64E-90 | 0.79        | hHC008411 | NM_032409         |
| Neurodegenerative | PSEN2       | 5664          | presenilin 2 (Alzheimer disease 4)                                    | 1q31-q42         | "Mendelian" Gene/Linkage Analysis | -1.15                             | -20.11      | 3.69E-53 | 0.58        | hHC024320 | NM_000447         |
| Neurodegenerative | RAB25       | 57111         | RAB25, member RAS oncogene family                                     | 1q22             | GWAS                              | -0.02                             | -0.19       | 8.50E-01 | -0.13       | hHC023607 | NM_020387         |
| Neurodegenerative | SETD1A      | 9739          | SET domain containing 1A                                              | 16p11.2          | GWAS                              | -0.33                             | -7.76       | 2.52E-13 | 0.10        | hHC024151 | NM_014712         |
| Neurodegenerative | SNCA        | 6622          | synuclein, alpha (non A4 component of amyloid precursor)              | 4q21             | "Mendelian" Gene/Linkage Analysis | -1.86                             | -16.66      | 9.07E-42 | 0.48        | hHC003453 | NM_000345         |
| Neurodegenerative | SOD1        | 6647          | superoxide dismutase 1, soluble                                       | 21q22.1 21q22.11 | "Mendelian" Gene/Linkage Analysis | -0.41                             | -6.53       | 4.06E-10 | 0.04        | hHC020010 | NM_000454         |
| Neurodegenerative | STK39       | 27347         | serine threonine kinase 39 (STE20/SPS1 homolog, yeast)                | 2q24.3           | GWAS                              | -1.34                             | -19.27      | 2.09E-50 | 0.56        | hHC006733 | NM_013233         |
| Neurodegenerative | TAGAP       | 117289        | T-cell activation RhoGTPase activating protein                        | 6q25.3           | GWAS                              | -0.11                             | -1.05       | 2.96E-01 | -0.13       | hHA034514 | NM_138810         |
| Neurodegenerative | UBQLN2      | 29978         | ubiquilin 2                                                           | Xp11.23-p11.1    | "Mendelian" Gene/Linkage Analysis | -0.49                             | -7.81       | 1.87E-13 | 0.10        | hHC003359 | NM_013444         |
| Neurodegenerative | VAPB        | 9217          | VAMP (vesicle-associated membrane protein)-associated protein B and C | 20q13.33         | "Mendelian" Gene/Linkage Analysis | -0.68                             | -6.25       | 1.89E-09 | 0.03        | hHR011073 | NM_004738         |
| Neurodegenerative | VPS35       | 55737         | vacuolar protein sorting 35 homolog (S. cerevisiae)                   | 16q12            | "Mendelian" Gene/Linkage Analysis | -0.77                             | -13.16      | 4.65E-30 | 0.35        | hHC011701 | NM_018206         |

Supp Table 2 Overlap

| Gene Set                               | Gene Symbol | EntrezGene ID | Description                                                                          | Location      | Beta Coefficient ("Fetal Effect") | t-statistic | p-value   | Adjusted R2 | Probe     | Ref Seq Accession |
|----------------------------------------|-------------|---------------|--------------------------------------------------------------------------------------|---------------|-----------------------------------|-------------|-----------|-------------|-----------|-------------------|
| SCZ (Meta-analysis), NDG               | AH1         | 54806         | Abelson helper integration site 1                                                    | 6q23.3        | -1.06                             | -14.54      | 1.13E-34  | 0.40        | hHR010594 | NM_001134831      |
| SCZ (PGC GWAS), BPAD GWAS              | ALAS1       | 211           | aminolevulinatase, delta-, synthase 1                                                | 3p21.1        | 0.33                              | 6.42        | 7.35E-10  | 0.04        | hHA037941 | NM_000688         |
| ASD (Database), BPAD GWAS, NDD         | ANK3        | 288           | ankyrin 3, node of Ranvier (ankyrin G)                                               | 10q21         | 2.42                              | 22.94       | 4.18E-62  | 0.65        | hHA034365 | NM_020987         |
| SCZ (Meta-analysis), NDG               | APOE        | 348           | apolipoprotein E                                                                     | 19q13.2       | -2.54                             | -18.34      | 2.35E-47  | 0.53        | hHC024278 | NM_000041         |
| SCZ (PGC GWAS), BPAD GWAS              | BAP1        | 8314          | BRCA1 associated protein-1 (ubiquitin carboxy-terminal hydrolase)                    | 3p21.31-p21.2 | -0.52                             | -8.90       | 1.49E-16  | 0.15        | hHC018424 | NM_004656         |
| NDD, SCZ SNV                           | C18orf1     | 753           | chromosome 18 open reading frame 1                                                   | 18p11.2       | -0.04                             | -0.41       | 6.79E-01  | -0.13       | hHC001974 | NM_001003674      |
| SCZ (PGC GWAS), BPAD GWAS              | CACNA1C     | 775           | calcium channel, voltage-dependent, L type, alpha 1C subunit                         |               | 0.45                              | 4.55        | 8.60E-06  | -0.04       | hHA037564 | NM_001129840      |
| ASD (Database), BPAD GWAS              | CACNA1D     | 776           | calcium channel, voltage-dependent, L type, alpha 1D subunit                         | 3p14.3        | -0.11                             | -1.32       | 1.89E-01  | -0.12       | hHC016540 | NM_000720         |
| SCZ (SNV), ASD (Database)              | CACNA1I     | 8911          | calcium channel, voltage-dependent, T type, alpha 1I subunit                         | 22q13.1       | -0.98                             | -10.96      | 6.96E-23  | 0.25        | hHC014460 | NM_021096         |
| ID, NDD                                | CDKL5       | 6792          | cyclin-dependent kinase-like 5                                                       | Xp22          | 0.13                              | 1.57        | 1.18E-01  | -0.12       | hHC018635 | NM_003159         |
| SCZ (PGC GWAS), BPAD GWAS              | DNAH1       | 25981         | dynein, axonemal, heavy chain 1                                                      |               | -1.91                             | -16.91      | 1.26E-42  | 0.49        | hHR017783 | NM_015512         |
| SCZ (Meta-analysis), ASD (Database)    | DRD2        | 1813          | dopamine receptor D2                                                                 | 11q23         | 0.22                              | 2.30        | 2.24E-02  | -0.11       | hHA035616 | NM_000795         |
| NDD, ASD (Database), ID                | FOXP1       | 27086         | forkhead box P1                                                                      | 3p14.1        | 0.10                              | 1.11        | 2.69E-01  | -0.12       | hHC002879 | NM_032682         |
| SCZ (PGC GWAS), BPAD GWAS              | FTSJ2       | 29960         | FtsJ homolog 2 (E. coli)                                                             | 7p22          | -0.02                             | -0.40       | 6.90E-01  | -0.13       | hHC010873 | NM_013393         |
| SCZ (PGC GWAS), BPAD GWAS              | GLT8D1      | 55830         | glycosyltransferase 8 domain containing 1                                            | 3p21.1        | 0.52                              | 9.52        | 2.18E-18  | 0.18        | hHC017657 | NM_001010983      |
| SCZ (PGC GWAS), BPAD GWAS              | GLYCTK      | 132158        | glycerate kinase                                                                     | 3p21.1        | -0.32                             | -7.18       | 8.79E-12  | 0.07        | hHC018008 | NM_145262         |
| SCZ (PGC GWAS), BPAD GWAS              | GNL3        | 26354         | guanine nucleotide binding protein-like 3 (nucleolar)                                | 3p21.1        | -0.06                             | -0.50       | 6.15E-01  | -0.13       | hHA040707 | NM_206825         |
| ID, ASD (Database)                     | GRIK2       | 2898          | glutamate receptor, ionotropic, kainate 2                                            | 6q16.3-q21    | 1.76                              | 22.53       | 7.68E-61  | 0.64        | hHC019020 | NM_175768         |
| NDD, SCZ (Meta-analysis), ASD Database | GRIN2B      | 2904          | glutamate receptor, ionotropic, N-methyl D-aspartate 2B                              | 12p12         | 0.13                              | 2.02        | 4.46E-02  | -0.11       | hHC022772 | NM_000834         |
| SCZ (PGC GWAS), BPAD GWAS              | ITIH1       | 3697          | inter-alpha (globulin) inhibitor H1                                                  | 3p21.2-p21.1  | 0.01                              | 0.11        | 9.16E-01  | -0.13       | hHC022349 | NM_002215         |
| SCZ (PGC GWAS), BPAD GWAS              | ITIH3       | 3699          | inter-alpha (globulin) inhibitor H3                                                  | 3p21.2-p21.1  | -0.19                             | -2.38       | 1.79E-02  | -0.10       | hHC025527 | NM_002217         |
| SCZ (PGC GWAS), BPAD GWAS              | ITIH4       | 3700          | inter-alpha (globulin) inhibitor H4 (plasma Kallikrein-sensitive glycoprotein)       | 3p21-p14      | -0.59                             | -9.22       | 1.67E-17  | 0.17        | hHC024955 | NM_002218         |
| SCZ (SNV), ASD (Database)              | LAMA1       | 284217        | laminin, alpha 1                                                                     | 18p11.31      | 2.02                              | 14.87       | 9.22E-36  | 0.41        | hHC007864 | NM_005559         |
| SCZ (PGC GWAS), BPAD GWAS              | LBA1        | 9881          | lupus brain antigen 1                                                                | 3p22.2        | -0.43                             | -5.23       | 3.65E-07  | -0.01       | hHR016901 | NM_014831         |
| SCZ (PGC GWAS), BPAD GWAS              | MAD1L1      | 8379          | MAD1 mitotic arrest deficient-like 1 (yeast)                                         | 7p22          | -0.67                             | -9.84       | 2.22E-19  | 0.20        | hHR019802 | NM_003550         |
| ASD CNV, SCZ SNV                       | MBTPS1      | 8720          | membrane-bound transcription factor peptidase, site 1                                | 16 16q24      | 0.59                              | 10.10       | 3.47E-20  | 0.21        | hHA035034 | NM_003791         |
| ID, ASD (Database)                     | MEF2C       | 4208          | myocyte enhancer factor 2C                                                           | 5q14          | 0.45                              | 3.85        | 1.50E-04  | -0.06       | hHR007934 | NM_002397         |
| SCZ (Meta-analysis), ASD (Database)    | MTHFR       | 4524          | 5,10-methylenetetrahydrofolate reductase (NADPH)                                     | 1p36.3        | 0.54                              | 5.23        | 3.69E-07  | -0.01       | hHC015904 | NM_005957         |
| SCZ (PGC GWAS), BPAD GWAS              | MUSTN1      | 389125        | musculoskeletal, embryonic nuclear protein 1                                         | 3p21.1        | -2.05                             | -13.74      | 5.32E-32  | 0.37        | hHC019519 | NM_205853         |
| SCZ (PGC GWAS, SNV), BPAD GWAS         | NCAN        | 1463          | neurocan                                                                             | 19p12         | 1.30                              | 15.11       | 1.36E-36  | 0.42        | hHC008161 | NM_004386         |
| SCZ (PGC GWAS), BPAD GWAS              | NEK4        | 6787          | NIMA (never in mitosis gene a)-related kinase 4                                      | 3p21.1        | 0.40                              | 7.44        | 1.88E-12  | 0.08        | hHC006908 | NM_003157         |
| SCZ (PGC GWAS), BPAD GWAS              | NISCH       | 11188         | nischarin                                                                            | 3p21.1        | -0.46                             | -6.97       | 3.17E-11  | 0.06        | hHC014499 | NM_007184         |
| ID, SCZ (CNV), ASD (CNV)               | NRXN1       | 9378          | neurexin 1                                                                           | 2p16.3        | 1.31                              | 14.33       | 6.02E-34  | 0.39        | hHA035283 | NM_001135659      |
| SCZ (PGC GWAS), BPAD GWAS              | NT5DC2      | 64943         | 5'-nucleotidase domain containing 2                                                  | 3p21.1        | 1.62                              | 17.99       | 3.39E-46  | 0.52        | hHC024330 | NM_022908         |
| SCZ (PGC GWAS), SCZ (CNV), BPAD GWAS   | NUDT1       | 4521          | nudix (nucleoside diphosphate linked moiety X)-type motif 1                          | 7p22          | 1.27                              | 19.68       | 9.29E-52  | 0.57        | hHC024103 | NM_198949         |
| SCZ (PGC GWAS), BPAD GWAS              | PBRM1       | 55193         | polybromo 1                                                                          | 3p21          | 2.25                              | 42.58       | 5.14E-113 | 0.87        | hHC007983 | NM_018313         |
| SCZ (Meta-analysis), ASD (Database)    | PDE4B       | 5142          | phosphodiesterase 4B, cAMP-specific (phosphodiesterase E4 dunce homolog, Drosophila) | 1p31          | -0.49                             | -7.51       | 1.18E-12  | 0.09        | hHC005298 | NM_001037341      |
| SCZ (PGC GWAS), BPAD GWAS              | PHF7        | 51533         | PHD finger protein 7                                                                 | 3p21.1        | 0.22                              | 2.72        | 7.03E-03  | -0.10       | hHC012761 | NM_016483         |
| SCZ (PGC GWAS), BPAD GWAS              | PPM1M       | 132160        | protein phosphatase 1M (PP2C domain containing)                                      | 3p21.1        | -0.42                             | -4.50       | 1.07E-05  | -0.04       | hHC011132 | NM_144641         |
| SCZ (SNV), ASD (Database)              | PRKCB       | 5579          | protein kinase C, beta                                                               | 16p11.2       | -3.02                             | -29.72      | 6.74E-82  | 0.76        | hHC021733 | NM_002738         |
| ID, ASD (Database)                     | RAI1        | 10743         | retinoic acid induced 1                                                              | 17p11.2       | 0.99                              | 15.41       | 1.40E-37  | 0.44        | hHC011816 | NM_030665         |

Supp Table 2 Overlap

| Gene Set                            | Gene Symbol | EntrezGene ID | Description                                                                            | Location     | Beta Coefficient ("Fetal Effect") | t-statistic | p-value  | Adjusted R2 | Probe     | Ref Seq Accession |
|-------------------------------------|-------------|---------------|----------------------------------------------------------------------------------------|--------------|-----------------------------------|-------------|----------|-------------|-----------|-------------------|
| SCZ (Meta-analysis), ASD (Database) | RELN        | 5649          | reelin                                                                                 | 7q22         | 0.25                              | 1.83        | 6.86E-02 | -0.12       | hHC004991 | NM_005045         |
| SCZ (PGC GWAS), BPAD GWAS           | RFT1        | 91869         | RFT1 homolog ( <i>S. cerevisiae</i> )                                                  |              | 0.34                              | 4.68        | 4.73E-06 | -0.03       | hHR013631 | NM_052859         |
| SCZ (PGC GWAS), BPAD GWAS           | SEMA3G      | 56920         | sema domain, immunoglobulin domain (Ig), short basic domain, secreted, (semaphorin) 3G | 3p21.1       | -0.92                             | -6.78       | 9.72E-11 | 0.05        | hHC010991 | NM_020163         |
| SCZ (SNV), NDG                      | SETD1A      | 9739          | SET domain containing 1A                                                               | 16p11.2      | -0.33                             | -7.76       | 2.52E-13 | 0.10        | hHC024151 | NM_014712         |
| SCZ (PGC GWAS), BPAD GWAS           | SFMBT1      | 51460         | Scm-like with four mbt domains 1                                                       | 3p21.1       | 0.49                              | 7.89        | 1.08E-13 | 0.10        | hHC019969 | NM_001005159      |
| SCZ (PGC GWAS), BPAD GWAS           | SH3PXD2A    | 9644          | SH3 and PX domains 2A                                                                  | 10q24.33     | 0.09                              | 1.21        | 2.29E-01 | -0.12       | hHC020707 | NM_014631         |
| SCZ (PGC GWAS), BPAD GWAS           | SPCS1       | 28972         | signal peptidase complex subunit 1 homolog ( <i>S. cerevisiae</i> )                    | 3p21.1       | -0.73                             | -12.08      | 1.66E-26 | 0.30        | hHC009782 | NM_014041         |
| SCZ (PGC GWAS), BPAD GWAS           | STAB1       | 23166         | stabilin 1                                                                             | 3p21.1       | -0.06                             | -0.75       | 4.56E-01 | -0.13       | hHC025154 | NM_015136         |
| ASD(Database), BPAD GWAS, NDG       | STK39       | 27347         | serine threonine kinase 39 (STE20/SPS1 homolog, yeast)                                 | 2q24.3       | -1.34                             | -19.27      | 2.09E-50 | 0.56        | hHC006733 | NM_013233         |
| SCZ (SNV), ASD (Database), ID       | SYNGAP1     | 8831          | synaptic Ras GTPase activating protein 1 homolog (rat)                                 | 6p21.3       | -0.05                             | -0.57       | 5.67E-01 | -0.13       | hHC014146 | NM_006772         |
| NDD, SCZ (Meta-analysis, GWAS), ID  | TCF4        | 6925          | transcription factor 4                                                                 | 18q21.1      | 0.80                              | 12.62       | 2.92E-28 | 0.32        | hHC020459 | NM_001083962      |
| SCZ (SNV), ASD (Database)           | TLK2        | 11011         | tousled-like kinase 2                                                                  | 17q23        | 0.66                              | 11.43       | 2.13E-24 | 0.27        | hHC030724 | NM_006852         |
| SCZ (PGC GWAS), BPAD GWAS           | TLR9        | 54106         | toll-like receptor 9                                                                   | 3p21.3       | 0.07                              | 1.23        | 2.19E-01 | -0.12       | hHA039914 | NM_017442         |
| SCZ (PGC GWAS), BPAD GWAS           | TNNC1       | 7134          | troponin C type 1 (slow)                                                               | 3p21.3-p14.3 | -0.27                             | -3.06       | 2.51E-03 | -0.09       | hHC020672 | NM_003280         |
| SCZ (PGC GWAS), BPAD GWAS           | TWF2        | 11344         | twinfilin, actin-binding protein, homolog 2 ( <i>Drosophila</i> )                      | 3p21.1       | -0.33                             | -7.41       | 2.26E-12 | 0.08        | hHC020722 | NM_007284         |
| ID, ASD (Database)                  | UBE3A       | 7337          | ubiquitin protein ligase E3A                                                           | 15q11-q13    | 0.71                              | 6.01        | 7.11E-09 | 0.02        | hHA033034 | NM_130839         |
| SCZ (SNV), ASD (Database)           | UBR5        | NA            | ubiquitin protein ligase E3 component n-recognin 5                                     | 8q22         | 1.53                              | 15.90       | 3.02E-39 | 0.45        | hHC001627 | CD511402          |
| SCZ (SNV), NDG                      | VPS35       | 55737         | vacuolar protein sorting 35 homolog ( <i>S. cerevisiae</i> )                           | 16q12        | -0.77                             | -13.16      | 4.65E-30 | 0.35        | hHC011701 | NM_018206         |
| SCZ (PGC GWAS), BPAD GWAS           | WDR82       | 80335         | WD repeat domain 82                                                                    | 3p21.1       | 0.82                              | 17.15       | 2.11E-43 | 0.50        | hHC025830 | NM_025222         |
| SCZ (PGC GWAS), ID                  | ZEB2        | 9839          | zinc finger E-box binding homeobox 2                                                   | 2q22.3       | 1.50                              | 15.51       | 6.50E-38 | 0.44        | hHR029739 | NM_014795         |
| NDD, SCZ (Meta-analysis)            | ZNF804A     | 91752         | zinc finger protein 804A                                                               | 2q32.1       | 0.54                              | 4.35        | 2.06E-05 | -0.05       | hHC001802 | NM_194250         |





Supp Table 3 GO Enrichment

| Set    | Gene Set Size (Mapping to probe) | Fetally Expressed Genes (Fetal Effect>0.5) | Gene Set Size used for enrichment analysis | Background Universe n (Unique genes) | Background Universe n (transcripts) | GO Type | GOBPID     | Pvalue   | OddsRatio | Count | Size | Term                                                  | ID                                   | FDR      | Bon      |
|--------|----------------------------------|--------------------------------------------|--------------------------------------------|--------------------------------------|-------------------------------------|---------|------------|----------|-----------|-------|------|-------------------------------------------------------|--------------------------------------|----------|----------|
| ASD DB | 242                              | 88                                         | 84                                         | 15802                                | 30088                               | CC      | GO:0014069 | 2.06E-03 | 8.1       | 4     | 92   | postsynaptic density                                  | 020794;NM_015310;NM_012309;NM_00108  | 2.41E-02 | 5.29E-01 |
| ASD DB | 242                              | 88                                         | 84                                         | 15802                                | 30088                               | CC      | GO:0044327 | 2.06E-03 | 8.1       | 4     | 92   | dendritic spine head                                  | 020794;NM_015310;NM_012309;NM_00108  | 2.41E-02 | 5.29E-01 |
| ASD DB | 242                              | 88                                         | 84                                         | 15802                                | 30088                               | CC      | GO:0044300 | 2.68E-03 | 2.6       | 14    | 1042 | cytoskeletal part                                     | 1_002093;NM_006037;NM_020794;NM_002  | 2.94E-02 | 6.89E-01 |
| ASD DB | 242                              | 88                                         | 84                                         | 15802                                | 30088                               | CC      | GO:0042497 | 2.75E-03 | 4.6       | 6     | 239  | cell body                                             | 00112751;NM_175768;NM_002374;NM_13   | 2.94E-02 | 7.06E-01 |
| ASD DB | 242                              | 88                                         | 84                                         | 15802                                | 30088                               | MF      | GO:0003682 | 6.16E-05 | 6.7       | 8     | 216  | chromatin binding                                     | 1_004405;NM_001429;NM_004965;NM_004  | 2.05E-02 | 2.17E-02 |
| ASD DB | 242                              | 88                                         | 84                                         | 15802                                | 30088                               | MF      | GO:0005488 | 1.81E-04 | 4.7       | 73    | 9746 | binding                                               | 688;NM_020931;NM_005559;NM_002374;N  | 2.05E-02 | 6.35E-02 |
| ASD DB | 242                              | 88                                         | 84                                         | 15802                                | 30088                               | MF      | GO:0030159 | 2.17E-04 | 30.7      | 3     | 19   | receptor signaling complex scaffold activity          | NM_021150;NM_012309;NM_001080420     | 2.05E-02 | 7.62E-02 |
| ASD DB | 242                              | 88                                         | 84                                         | 15802                                | 30088                               | MF      | GO:0030160 | 2.33E-04 | 161.9     | 2     | 4    | GKAP/Homer scaffold activity                          | NM_012309;NM_001080420               | 2.05E-02 | 8.20E-02 |
| ASD DB | 242                              | 88                                         | 84                                         | 15802                                | 30088                               | MF      | GO:0008013 | 3.62E-04 | 13.3      | 4     | 54   | beta-catenin binding                                  | 00112751;NM_001429;NM_021150;NM_00   | 2.55E-02 | 1.28E-01 |
| BPAD   | 123                              | 30                                         | 29                                         | 15802                                | 30146                               | BP      | GO:0043153 | 1.15E-03 | 988.4     | 2     | 3    | entrainment of circadian clock by photoperiod         | NM_002896;NM_031492                  | 7.70E-03 | 7.70E-03 |
| BPAD   | 123                              | 30                                         | 29                                         | 15802                                | 30146                               | BP      | GO:0009648 | 1.15E-03 | 329.4     | 2     | 5    | photoperiodism                                        | NM_002896;NM_031492                  | 1.28E-02 | 2.56E-02 |
| BPAD   | 123                              | 30                                         | 29                                         | 15802                                | 30146                               | BP      | GO:0009649 | 1.28E-04 | 164.7     | 2     | 8    | entrainment of circadian clock                        | NM_002896;NM_031492                  | 2.38E-02 | 7.14E-02 |
| BPAD   | 123                              | 30                                         | 29                                         | 15802                                | 30146                               | BP      | GO:0032922 | 2.50E-04 | 109.8     | 2     | 11   | circadian regulation of gene expression               | NM_002896;NM_031492                  | 3.49E-02 | 1.40E-01 |
| ID     | 94                               | 35                                         | 34                                         | 15802                                | 30141                               | BP      | GO:0043113 | 1.15E-03 | 74.0      | 3     | 19   | receptor clustering                                   | NM_175768;NM_001135659;NM_001110556  | 1.01E-02 | 1.72E-02 |
| ID     | 94                               | 35                                         | 34                                         | 15802                                | 30141                               | BP      | GO:0042384 | 1.15E-03 | 29.1      | 4     | 60   | cilium assembly                                       | 005249;NM_000276;NM_003611;NM_00111  | 1.01E-02 | 2.02E-02 |
| ID     | 94                               | 35                                         | 34                                         | 15802                                | 30141                               | BP      | GO:0051966 | 1.15E-03 | 51.4      | 3     | 26   | regulation of synaptic transmission, glutamatergic    | NM_175768;NM_001135659;NM_002547     | 1.52E-02 | 4.56E-02 |
| ID     | 94                               | 35                                         | 34                                         | 15802                                | 30141                               | BP      | GO:0060271 | 7.04E-05 | 21.1      | 4     | 81   | cilium morphogenesis                                  | 005249;NM_000276;NM_003611;NM_00111  | 1.52E-02 | 6.61E-02 |
| ID     | 94                               | 35                                         | 34                                         | 15802                                | 30141                               | BP      | GO:0030031 | 8.16E-05 | 13.1      | 5     | 164  | cell projection assembly                              | 9;NM_000276;NM_003611;NM_002547;NM   | 1.52E-02 | 7.66E-02 |
| ID     | 94                               | 35                                         | 34                                         | 15802                                | 30141                               | BP      | GO:0007420 | 9.72E-05 | 7.8       | 7     | 403  | brain development                                     | 849;NM_002025;NM_014795;NM_000489;N  | 1.52E-02 | 9.13E-02 |
| ID     | 94                               | 35                                         | 34                                         | 15802                                | 30141                               | BP      | GO:0048858 | 1.49E-04 | 6.3       | 8     | 583  | cell projection morphogenesis                         | 01135659;NM_000276;NM_003611;NM_020  | 1.65E-02 | 1.40E-01 |
| ID     | 94                               | 35                                         | 34                                         | 15802                                | 30141                               | BP      | GO:0032990 | 1.69E-04 | 6.2       | 8     | 594  | cell part morphogenesis                               | 01135659;NM_000276;NM_003611;NM_020  | 1.65E-02 | 1.59E-01 |
| ID     | 94                               | 35                                         | 34                                         | 15802                                | 30141                               | BP      | GO:0010927 | 1.79E-04 | 16.4      | 4     | 103  | cellular component assembly involved in morphogenesis | 005249;NM_000276;NM_003611;NM_00111  | 1.65E-02 | 1.68E-01 |
| ID     | 94                               | 35                                         | 34                                         | 15802                                | 30141                               | BP      | GO:0030030 | 1.82E-04 | 5.5       | 9     | 771  | cell projection organization                          | 59;NM_003383;NM_000276;NM_003611;N   | 1.65E-02 | 1.71E-01 |
| ID     | 94                               | 35                                         | 34                                         | 15802                                | 30141                               | BP      | GO:0035249 | 1.93E-04 | 31.1      | 3     | 41   | synaptic transmission, glutamatergic                  | NM_175768;NM_001135659;NM_002547     | 1.65E-02 | 1.82E-01 |
| ID     | 94                               | 35                                         | 34                                         | 15802                                | 30141                               | BP      | GO:0000902 | 2.14E-04 | 5.3       | 9     | 788  | cell morphogenesis                                    | 59;NM_153252;NM_000276;NM_003611;N   | 1.68E-02 | 2.01E-01 |
| ID     | 94                               | 35                                         | 34                                         | 15802                                | 30141                               | BP      | GO:0032989 | 3.00E-04 | 5.1       | 9     | 824  | cellular component morphogenesis                      | 59;NM_153252;NM_000276;NM_003611;N   | 2.16E-02 | 2.81E-01 |
| ID     | 94                               | 35                                         | 34                                         | 15802                                | 30141                               | BP      | GO:0050890 | 5.63E-04 | 12.0      | 4     | 139  | cognition                                             | 002025;NM_001135659;NM_006765;NM_00  | 3.78E-02 | 5.29E-01 |
| ID     | 94                               | 35                                         | 34                                         | 15802                                | 30141                               | BP      | GO:0048856 | 6.06E-04 | 3.3       | 18    | 3163 | anatomical structure development                      | 181777;NM_153252;NM_030665;NM_00338  | 3.79E-02 | 5.69E-01 |
| ID     | 94                               | 35                                         | 34                                         | 15802                                | 30141                               | BP      | GO:0007417 | 6.81E-04 | 5.6       | 7     | 554  | central nervous system development                    | 849;NM_002025;NM_014795;NM_000489;N  | 4.00E-02 | 6.39E-01 |
| ID     | 94                               | 35                                         | 34                                         | 15802                                | 30141                               | CC      | GO:0044456 | 5.50E-05 | 10.7      | 6     | 302  | synapse part                                          | 003619;NM_003688;NM_001135659;NM_02  | 4.04E-03 | 9.24E-03 |
| ID     | 94                               | 35                                         | 34                                         | 15802                                | 30141                               | CC      | GO:0043195 | 6.26E-05 | 46.4      | 3     | 34   | terminal button                                       | NM_175768;NM_003619;NM_002547        | 4.04E-03 | 1.05E-02 |
| ID     | 94                               | 35                                         | 34                                         | 15802                                | 30141                               | CC      | GO:0033267 | 8.60E-05 | 20.0      | 4     | 103  | axon part                                             | 175768;NM_003619;NM_001135659;NM_00  | 4.04E-03 | 1.45E-02 |
| ID     | 94                               | 35                                         | 34                                         | 15802                                | 30141                               | CC      | GO:0042734 | 1.37E-04 | 35.1      | 3     | 44   | presynaptic membrane                                  | NM_175768;NM_003688;NM_001135659     | 4.04E-03 | 2.29E-02 |
| ID     | 94                               | 35                                         | 34                                         | 15802                                | 30141                               | CC      | GO:0044463 | 1.37E-04 | 7.4       | 7     | 517  | cell projection part                                  | 9;NM_003688;NM_001135659;NM_003611;N | 4.04E-03 | 2.31E-02 |
| ID     | 94                               | 35                                         | 34                                         | 15802                                | 30141                               | CC      | GO:0043229 | 1.64E-04 | 8.2       | 29    | 8641 | intracellular organelle                               | 7;NM_003588;NM_080632;NM_006594;NM   | 4.04E-03 | 2.75E-02 |
| ID     | 94                               | 35                                         | 34                                         | 15802                                | 30141                               | CC      | GO:0043226 | 1.68E-04 | 8.1       | 29    | 8651 | organelle                                             | 7;NM_003588;NM_080632;NM_006594;NM   | 4.04E-03 | 2.83E-02 |
| ID     | 94                               | 35                                         | 34                                         | 15802                                | 30141                               | CC      | GO:0043679 | 2.52E-04 | 28.2      | 3     | 54   | axon terminus                                         | NM_175768;NM_003619;NM_002547        | 4.09E-03 | 4.23E-02 |
| ID     | 94                               | 35                                         | 34                                         | 15802                                | 30141                               | CC      | GO:0005905 | 2.66E-04 | 27.6      | 3     | 55   | coated pit                                            | NM_003383;NM_004722;NM_000276        | 4.09E-03 | 4.47E-02 |
| ID     | 94                               | 35                                         | 34                                         | 15802                                | 30141                               | CC      | GO:0045202 | 2.67E-04 | 7.9       | 6     | 403  | synapse                                               | 003619;NM_003688;NM_001135659;NM_02  | 4.09E-03 | 4.49E-02 |
| ID     | 94                               | 35                                         | 34                                         | 15802                                | 30141                               | CC      | GO:0042995 | 2.68E-04 | 5.2       | 9     | 987  | cell projection                                       | 9;NM_003688;NM_001135659;NM_000276;N | 4.09E-03 | 4.50E-02 |
| ID     | 94                               | 35                                         | 34                                         | 15802                                | 30141                               | CC      | GO:0044306 | 3.44E-04 | 25.2      | 3     | 60   | neuron projection terminus                            | NM_175768;NM_003619;NM_002547        | 4.82E-03 | 5.78E-02 |
| ID     | 94                               | 35                                         | 34                                         | 15802                                | 30141                               | MF      | GO:0004385 | 3.83E-04 | 87.3      | 2     | 11   | guanylate kinase activity                             | NM_003688;NM_020730                  | 2.43E-02 | 8.12E-02 |
| ID     | 94                               | 35                                         | 34                                         | 15802                                | 30141                               | MF      | GO:0031625 | 4.29E-04 | 12.9      | 4     | 133  | ubiquitin protein ligase binding                      | 1_000381;NM_175768;NM_181777;NM_003  | 2.43E-02 | 9.09E-02 |
| ID     | 94                               | 35                                         | 34                                         | 15802                                | 30141                               | MF      | GO:0044389 | 4.29E-04 | 12.9      | 4     | 133  | small conjugating protein ligase binding              | 1_000381;NM_175768;NM_181777;NM_003  | 2.43E-02 | 9.09E-02 |
| ID     | 94                               | 35                                         | 34                                         | 15802                                | 30141                               | MF      | GO:0035255 | 4.59E-04 | 78.6      | 2     | 12   | ionotropic glutamate receptor binding                 | NM_020730;NM_002547                  | 2.43E-02 | 9.72E-02 |
| ID     | 94                               | 35                                         | 34                                         | 15802                                | 30141                               | MF      | GO:0035254 | 9.37E-04 | 52.4      | 2     | 17   | glutamate receptor binding                            | NM_020730;NM_002547                  | 3.97E-02 | 1.99E-01 |
| ID     | 94                               | 35                                         | 34                                         | 15802                                | 30141                               | MF      | GO:0019201 | 1.44E-03 | 41.3      | 2     | 21   | nucleotide kinase activity                            | NM_003688;NM_020730                  | 4.77E-02 | 3.05E-01 |
| NDG    | 46                               | 5                                          | 5                                          | 15802                                | 30171                               | CC      | GO:0045298 | 1.11E-03 | 1685.5    | 1     | 3    | tubulin complex                                       | NM_001123066                         | 4.50E-02 | 9.00E-02 |
| NDG    | 46                               | 5                                          | 5                                          | 15802                                | 30171                               | CC      | GO:0030424 | 2.70E-03 | 39.5      | 2     | 226  | axon                                                  | NM_000484;NM_001123066               | 4.50E-02 | 2.19E-01 |
| NDG    | 46                               | 5                                          | 5                                          | 15802                                | 30171                               | CC      | GO:0035253 | 2.96E-03 | 481.4     | 1     | 8    | ciliary rootlet                                       | NM_000484                            | 4.50E-02 | 2.40E-01 |
| NDG    | 46                               | 5                                          | 5                                          | 15802                                | 30171                               | CC      | GO:0043233 | 3.24E-03 | 20.2      | 4     | 2231 | organelle lumen                                       | 000484;NM_012120;NM_004960;NM_00112  | 4.50E-02 | 2.62E-01 |
| NDG    | 46                               | 5                                          | 5                                          | 15802                                | 30171                               | CC      | GO:0031974 | 3.46E-03 | 19.8      | 4     | 2270 | membrane-enclosed lumen                               | 000484;NM_012120;NM_004960;NM_00112  | 4.50E-02 | 2.80E-01 |
| NDG    | 46                               | 5                                          | 5                                          | 15802                                | 30171                               | CC      | GO:0042995 | 3.49E-03 | 19.1      | 3     | 987  | cell projection                                       | NM_000484;NM_012120;NM_001123066     | 4.50E-02 | 2.83E-01 |
| NDG    | 46                               | 5                                          | 5                                          | 15802                                | 30171                               | CC      | GO:0044430 | 4.08E-03 | 18.0      | 3     | 1042 | cytoskeletal part                                     | NM_000484;NM_012120;NM_001123066     | 4.50E-02 | 3.31E-01 |
| NDG    | 46                               | 5                                          | 5                                          | 15802                                | 30171                               | CC      | GO:0051233 | 4.44E-03 | 306.3     | 1     | 12   | spindle midzone                                       | NM_000484                            | 4.50E-02 | 3.60E-01 |
| NDG    | 46                               | 5                                          | 5                                          | 15802                                | 30171                               | CC      | GO:0004385 | 3.83E-04 | 87.3      | 2     | 11   | guanylate kinase activity                             | NM_003688;NM_020730                  | 2.43E-02 | 8.12E-02 |
| NDG    | 46                               | 5                                          | 5                                          | 15802                                | 30171                               | CC      | GO:0031625 | 4.29E-04 | 12.9      | 4     | 133  | ubiquitin protein ligase binding                      | 1_000381;NM_175768;NM_181777;NM_003  | 2.43E-02 | 9.09E-02 |
| NDG    | 46                               | 5                                          | 5                                          | 15802                                | 30171                               | CC      | GO:0044389 | 4.29E-04 | 12.9      | 4     | 133  | small conjugating protein ligase binding              | 1_000381;NM_175768;NM_181777;NM_003  | 2.43E-02 | 9.09E-02 |
| NDG    | 46                               | 5                                          | 5                                          | 15802                                | 30171                               | CC      | GO:0035255 | 4.59E-04 | 78.6      | 2     | 12   | ionotropic glutamate receptor binding                 | NM_020730;NM_002547                  | 2.43E-02 | 9.72E-02 |
| NDG    | 46                               | 5                                          | 5                                          | 15802                                | 30171                               | CC      | GO:0035254 | 9.37E-04 | 52.4      | 2     | 17   | glutamate receptor binding                            | NM_020730;NM_002547                  | 3.97E-02 | 1.99E-01 |
| NDG    | 46                               | 5                                          | 5                                          | 15802                                | 30171                               | CC      | GO:0019201 | 1.44E-03 | 41.3      | 2     | 21   | nucleotide kinase activity                            | NM_003688;NM_020730                  | 4.77E-02 | 3.05E-01 |
| NDG    | 46                               | 5                                          | 5                                          | 15802                                | 30171                               | CC      | GO:0005200 | 1.76E-04 | 187.0     | 2     | 67   | structural constituent of cytoskeleton                | NM_012120;NM_001123066               | 4.69E-03 | 7.58E-03 |
| NDG    | 46                               | 5                                          | 5                                          | 15802                                | 30171                               | CC      | GO:0019904 | 2.18E-04 | 75.7      | 3     | 469  | protein domain specific binding                       | NM_000484;NM_012120;NM_001123066     | 4.69E-03 | 9.38E-03 |
| NDG    | 46                               | 5                                          | 5                                          |                                      |                                     |         |            |          |           |       |      |                                                       |                                      |          |          |

Supp Table 3 GO Enrichment

| Set | Gene Set Size (Mapping to probe) | Fetally Expressed Genes (Fetal Effect>0.5) | Gene Set Size used for enrichment analysis | Background Universe n (Unique genes) | Background Universe n (transcripts) | GO Type | GOBPID     | Pvalue   | OddsRatio | Count | Size | Term                          | ID                     | FDR      | Bon      |
|-----|----------------------------------|--------------------------------------------|--------------------------------------------|--------------------------------------|-------------------------------------|---------|------------|----------|-----------|-------|------|-------------------------------|------------------------|----------|----------|
| NDG | 46                               | 5                                          | 5                                          | 15802                                | 30171                               | CC      | GO:0034185 | 4.25E-03 | 339.1     | 1     | 13   | apolipoprotein binding        | NM_001123066           | 3.04E-02 | 1.83E-01 |
| NDG | 46                               | 5                                          | 5                                          | 15802                                | 30171                               | CC      | GO:0071813 | 6.53E-03 | 214.1     | 1     | 20   | lipoprotein particle binding  | NM_001123066           | 3.51E-02 | 2.81E-01 |
| NDG | 46                               | 5                                          | 5                                          | 15802                                | 30171                               | CC      | GO:0071814 | 6.53E-03 | 214.1     | 1     | 20   | protein-lipid complex binding | NM_001123066           | 3.51E-02 | 2.81E-01 |
| NDG | 46                               | 5                                          | 5                                          | 15802                                | 30171                               | CC      | GO:0005198 | 9.56E-03 | 23.4      | 2     | 502  | structural molecule activity  | NM_012120;NM_001123066 | 4.35E-02 | 4.11E-01 |
| NDG | 46                               | 5                                          | 5                                          | 15802                                | 30171                               | CC      | GO:0016504 | 1.01E-02 | 135.5     | 1     | 31   | peptidase activator activity  | NM_000484              | 4.35E-02 | 4.35E-01 |

Note: Not displayed in the table above are the gene sets with a gene set size of 1



Table S4 Coexpression

| Gene Set  | Probe     | Pre-natally enriched Disease-associated Gene | Correlated Probe | Gene      | Accession    | Pearson's Correlation Coefficient (RIN Adjusted) |
|-----------|-----------|----------------------------------------------|------------------|-----------|--------------|--------------------------------------------------|
| NDD       | hHC003332 | AUTS2                                        | hHR030827        | HMGN1     | NM_004965    | 0.80                                             |
|           |           |                                              | hHC030775        | RPS24     | NM_001142285 | 0.83                                             |
|           |           |                                              | hHC005526        | FDFT1     | NM_004462    | 0.83                                             |
|           |           |                                              | hHC007037        | VCAN      | NM_004385    | 0.86                                             |
|           |           |                                              | hHR029537        | BTF3      | NM_001037637 | 0.82                                             |
|           |           |                                              | hHC029645        | HNRPDL    | NR_003249    | 0.81                                             |
|           |           |                                              | hHC029931        | HMGN1     | NM_004965    | 0.81                                             |
|           |           |                                              | hHR030086        | HNRPA1L-2 | NR_002944    | 0.80                                             |
|           |           |                                              | hHR009745        | FOXG1     | NM_005249    | 0.82                                             |
|           |           |                                              | hHC031741        | EEF1B2    | NM_001959    | 0.83                                             |
| NDD       | hHA034365 | ANK3                                         | hHA034403        | NRXN1     | NM_001135659 | 0.85                                             |
|           |           |                                              | hHA036742        | NRXN1     | NM_001135659 | 0.80                                             |
|           |           |                                              | hHC002037        | APC       | NM_001127511 | 0.84                                             |
|           |           |                                              | hHA035661        | NRXN1     | NM_001135659 | 0.87                                             |
|           |           |                                              | hHC014372        | PCDHA1    | NM_018900    | 0.81                                             |
|           |           |                                              | hHC009631        | CDKL1     | NM_004196    | 0.81                                             |
|           |           |                                              | hHC014371        | PCDHA1    | NM_018900    | 0.83                                             |
|           |           |                                              | hHA035369        | NRXN1     | NM_001135659 | 0.81                                             |
| NDD       | hHA035450 | SOX5                                         | hHR003716        | MIB1      | NM_020774    | 0.80                                             |
|           |           |                                              | hHA037290        | SYNE2     | NM_182914    | 0.84                                             |
|           |           |                                              | hHA036869        | SYNE2     | NM_182914    | 0.83                                             |
|           |           |                                              | hHA034421        | SYNE2     | NM_182914    | 0.81                                             |
|           |           |                                              | hHA034061        | SYNE2     | NM_182914    | 0.84                                             |
|           |           |                                              | hHA035103        | SYNE2     | NM_182914    | 0.85                                             |
| NDD       | hHC001764 | SATB2                                        | hHC005100        | CDH10     | NM_006727    | 0.84                                             |
|           |           |                                              | hHC008844        | PPP1R14C  | NM_030949    | 0.86                                             |
|           |           |                                              | hHC010008        | GPRASP1   | NM_014710    | 0.83                                             |
|           |           |                                              | hHC002436        | SEMA3C    | NM_006379    | 0.82                                             |
|           |           |                                              | hHC009936        | TMOD1     | NM_003275    | 0.87                                             |
|           |           |                                              | hHC005064        | LMO4      | NM_006769    | 0.87                                             |
|           |           |                                              | hHC028284        | ACSL4     | NM_022977    | 0.83                                             |
|           |           |                                              | hHA033852        | ARPP-21   | NM_016300    | 0.87                                             |
|           |           |                                              | hHC013140        | NLN       | AB033052     | 0.87                                             |
|           |           |                                              | hHC018263        | LOC150568 | AK126958     | 0.86                                             |
|           |           |                                              | hHC011075        | NRXN1     | NM_001135659 | 0.81                                             |
|           |           |                                              | hHC003515        | CHL1      | NM_006614    | 0.85                                             |
|           |           |                                              | hHR004667        | KIAA1211  | NM_020722    | 0.80                                             |
|           |           |                                              | hHR003071        | FLRT2     | NM_013231    | 0.82                                             |
|           |           |                                              | hHC008950        | CCBE1     | NM_133459    | 0.82                                             |
|           |           |                                              | hHR009994        | KALRN     | NM_003947    | 0.82                                             |
|           |           |                                              | hHA033934        | PCDH10    | NM_032961    | 0.82                                             |
|           |           |                                              | hHC019546        | OAT       | NM_000274    | 0.82                                             |
| hHR002770 | THSD7B    | NM_001080427                                 | 0.88             |           |              |                                                  |
| hHC017266 | CUX2      | NM_015267                                    | 0.83             |           |              |                                                  |

Table S4 Coexpression

| Gene Set | Probe | Pre-natally enriched Disease-associated Gene | Correlated Probe | Gene      | Accession    | Pearson's Correlation Coefficient (RIN Adjusted) |
|----------|-------|----------------------------------------------|------------------|-----------|--------------|--------------------------------------------------|
|          |       |                                              | hHC017458        | NCALD     | NM_001040630 | 0.85                                             |
|          |       |                                              | hHC005289        | NAP1L3    | NM_004538    | 0.82                                             |
|          |       |                                              | hHC003777        | NAV3      | NM_014903    | 0.88                                             |
|          |       |                                              | hHR004557        | ATRNL1    | NM_207303    | 0.80                                             |
|          |       |                                              | hHC015105        | ARPP-21   | NM_016300    | 0.85                                             |
|          |       |                                              | hHC016833        | SRD5A1    | NM_001047    | 0.83                                             |
|          |       |                                              | hHC008901        | ELMO1     | NM_014800    | 0.81                                             |
|          |       |                                              | hHC013509        | RSPO3     | NM_032784    | 0.84                                             |
|          |       |                                              | hHC018609        | STK32B    | NM_018401    | 0.82                                             |
|          |       |                                              | hHA035912        | GRM7      | BC136458     | 0.86                                             |
|          |       |                                              | hHC008960        | NKAIN2    | NM_001040214 | 0.93                                             |
|          |       |                                              | hHC010412        | DB519783  | DB519783     | 0.89                                             |
|          |       |                                              | hHC004100        | UST       | NM_005715    | 0.83                                             |
|          |       |                                              | hHC002576        | DCLK1     | NM_004734    | 0.87                                             |
|          |       |                                              | hHR006055        | PCDHA1    | NM_018900    | 0.80                                             |
|          |       |                                              | hHC018655        | CXXC4     | NM_025212    | 0.84                                             |
|          |       |                                              | hHC006295        | JAZF1     | NM_175061    | 0.80                                             |
|          |       |                                              | hHC008995        | RIMS1     | BC036608     | 0.83                                             |
|          |       |                                              | hHE041335        | DCLK1     | NM_004734    | 0.89                                             |
|          |       |                                              | hHC002299        | AKAP7     | NM_016377    | 0.88                                             |
|          |       |                                              | hHC005898        | AFF2      | NM_002025    | 0.82                                             |
|          |       |                                              | hHC007530        | KCNK2     | NM_001017424 | 0.88                                             |
|          |       |                                              | hHC024318        | DOK4      | NM_018110    | 0.82                                             |
|          |       |                                              | hHC003222        | INA       | NM_032727    | 0.81                                             |
|          |       |                                              | hHC005154        | C1orf52   | NR_024113    | 0.81                                             |
|          |       |                                              | hHC015330        | RPRM      | NM_019845    | 0.84                                             |
|          |       |                                              | hHR002609        | LOC150568 | NR_015399    | 0.86                                             |
|          |       |                                              | hHC004805        | RUNDC3B   | NM_138290    | 0.83                                             |
|          |       |                                              | hHR006053        | PCDHA1    | NM_018900    | 0.80                                             |
|          |       |                                              | hHR001757        | HUWE1     | NM_031407    | 0.81                                             |
|          |       |                                              | hHC004361        | LRRC4C    | NM_020929    | 0.80                                             |
|          |       |                                              | hHR010109        | TBC1D30   | AB023201     | 0.84                                             |
|          |       |                                              | hHR005537        | LPHN3     | NM_015236    | 0.89                                             |
|          |       |                                              | hHR008897        | PLCH2     | NM_014638    | 0.82                                             |
|          |       |                                              | hHE040949        | EY892390  | EY892390     | 0.84                                             |
|          |       |                                              | hHC001625        | SCN3A     | NM_006922    | 0.80                                             |
|          |       |                                              | hHC008260        | GRM7      | NM_181874    | 0.88                                             |
|          |       |                                              | hHC005116        | CHRM2     | AL832585     | 0.86                                             |
|          |       |                                              | hHC004792        | PTCHD1    | NM_173495    | 0.87                                             |
|          |       |                                              | hHC009615        | L3MBTL3   | NM_032438    | 0.85                                             |
|          |       |                                              | hHR002139        | AK096649  | AK096649     | 0.94                                             |
|          |       |                                              | hHC003711        | ADAMTSL3  | NM_207517    | 0.83                                             |
|          |       |                                              | hHC004959        | CPVL      | NM_019029    | 0.80                                             |
|          |       |                                              | hHC006519        | CXXC4     | AK127778     | 0.86                                             |

Table S4 Coexpression

| Gene Set               | Probe     | Pre-natally enriched Disease-associated Gene | Correlated Probe | Gene      | Accession    | Pearson's Correlation Coefficient (RIN Adjusted) |
|------------------------|-----------|----------------------------------------------|------------------|-----------|--------------|--------------------------------------------------|
|                        |           |                                              | hHC019179        | RSPO3     | NM_032784    | 0.82                                             |
|                        |           |                                              | hHR006050        | PCDHA1    | NM_018900    | 0.80                                             |
|                        |           |                                              | hHR011906        | RIMBP2    | NM_015347    | 0.86                                             |
|                        |           |                                              | hHC014222        | C3orf59   | NM_178496    | 0.85                                             |
|                        |           |                                              | hHC009926        | SH3GL3    | NM_003027    | 0.86                                             |
|                        |           |                                              | hHC003698        | FRMD4A    | NM_018027    | 0.82                                             |
|                        |           |                                              | hHR001898        | KIAA1239  | NM_001144990 | 0.90                                             |
|                        |           |                                              | hHC002666        | ITPR1     | NM_001099952 | 0.89                                             |
|                        |           |                                              | hHC001741        | CCDC113   | NM_014157    | 0.81                                             |
|                        |           |                                              | hHC008737        | GNG2      | NM_053064    | 0.81                                             |
|                        |           |                                              | hHC008929        | ARAP2     | NM_015230    | 0.84                                             |
|                        |           |                                              | hHA034669        | CDC42     | NM_044472    | 0.81                                             |
|                        |           |                                              | hHA034861        | ARPP-21   | NM_016300    | 0.81                                             |
|                        |           |                                              | hHE041473        | BQ189296  | BQ189296     | 0.85                                             |
|                        |           |                                              | hHC004537        | LRRC8B    | NM_015350    | 0.85                                             |
| NDD                    | hHC004698 | SPAST                                        | hHC004698        | SPAST     | NM_014946    | 1.00                                             |
| NDD                    | hHC013184 | EHMT1                                        | hHC013184        | EHMT1     | AB058779     | 1.00                                             |
| NDD                    | hHC004253 | ITGB1                                        | hHR015907        | SEPT2     | NM_001008491 | 0.84                                             |
|                        |           |                                              | hHC004253        | ITGB1     | NM_002211    | 1.00                                             |
|                        |           |                                              | hHR013673        | ITGB1     | NM_002211    | 0.96                                             |
|                        |           |                                              | hHC008033        | SLC1A3    | NM_004172    | 0.80                                             |
|                        |           |                                              | hHR005523        | REEP3     | NM_001001330 | 0.82                                             |
|                        |           |                                              | hHA036351        | AGFG1     | NM_001135187 | 0.82                                             |
| NDD                    | hHC019897 | ZBTB20                                       | hHC019897        | ZBTB20    | NM_015642    | 1.00                                             |
| NDD                    | hHR030073 | METTL2B                                      | hHC029890        | METTL2B   | NM_018396    | 0.85                                             |
|                        |           |                                              | hHA034001        | FAM178A   | NM_018121    | 0.82                                             |
|                        |           |                                              | hHA033363        | TTC3      | NM_003316    | 0.84                                             |
|                        |           |                                              | hHR030073        | METTL2B   | NM_018396    | 1.00                                             |
|                        |           |                                              | hHA033181        | DHX9      | NM_001357    | 0.82                                             |
| NDD                    | hHC029691 | FAM107B                                      | hHC029691        | FAM107B   | NM_031453    | 1.00                                             |
| NDD                    | hHC020459 | TCF4                                         | hHC020459        | TCF4      | NM_001083962 | 1.00                                             |
| NDD                    | hHC012789 | CDK5RAP2                                     | hHC027600        | C10orf7   | NM_145247    | 0.84                                             |
|                        |           |                                              | hHC012789        | CDK5RAP2  | NM_018249    | 1.00                                             |
|                        |           |                                              | hHC015033        | TFAM      | NM_003201    | 0.83                                             |
| NDD                    | hHC004339 | MBD5                                         | hHC004339        | MBD5      | NM_018328    | 1.00                                             |
|                        |           |                                              | hHR027830        | TAF9      | NM_001015892 | 0.80                                             |
| NDD                    | hHR008345 | SNTG2                                        | hHR008345        | SNTG2     | NM_018968    | 1.00                                             |
| NDD                    | hHC001802 | ZNF804A                                      | hHC001802        | ZNF804A   | NM_194250    | 1.00                                             |
| CZ (SRF) Meta-analysis | hHA033957 | NRG1                                         | hHA033957        | NRG1      | NM_004495    | 1.00                                             |
| CZ (SRF) Meta-analysis | hHC010960 | PLXNA2                                       | hHA033168        | ZFP106    | NM_022473    | 0.85                                             |
|                        |           |                                              | hHA036720        | MAP4      | NM_002375    | 0.82                                             |
|                        |           |                                              | hHR017820        | LOC285178 | AK091571     | 0.80                                             |
|                        |           |                                              | hHC021227        | KIF21A    | NM_017641    | 0.85                                             |
|                        |           |                                              | hHC020447        | BBS4      | NM_033028    | 0.82                                             |

Table S4 Coexpression

| Gene Set               | Probe     | Pre-natally enriched Disease-associated Gene | Correlated Probe | Gene     | Accession    | Pearson's Correlation Coefficient (RIN Adjusted) |
|------------------------|-----------|----------------------------------------------|------------------|----------|--------------|--------------------------------------------------|
|                        |           |                                              | hHA032831        | TFAM     | NM_003201    | 0.83                                             |
|                        |           |                                              | hHA037235        | MAP4     | NM_002375    | 0.83                                             |
|                        |           |                                              | hHC031882        | EPN2     | NM_014964    | 0.88                                             |
|                        |           |                                              | hHC009658        | LPGAT1   | NM_014873    | 0.82                                             |
|                        |           |                                              | hHA037234        | MAP4     | NM_002375    | 0.85                                             |
|                        |           |                                              | hHE042165        | DB275830 | DB275830     | 0.87                                             |
|                        |           |                                              | hHE042537        | CHD9     | NM_025134    | 0.83                                             |
|                        |           |                                              | hHC017133        | ANKRD50  | NM_020337    | 0.83                                             |
|                        |           |                                              | hHA039933        | ILF3     | NM_017620    | 0.84                                             |
|                        |           |                                              | hHC022472        | ERC1     | NM_178037    | 0.83                                             |
|                        |           |                                              | hHA036500        | MACF1    | NM_012090    | 0.81                                             |
|                        |           |                                              | hHC014876        | GABRA3   | NM_000808    | 0.85                                             |
|                        |           |                                              | hHA034951        | ZFP106   | NM_022473    | 0.83                                             |
|                        |           |                                              | hHA036019        | LSAMP    | NM_002338    | 0.81                                             |
|                        |           |                                              | hHC021702        | ILF3     | NM_017620    | 0.83                                             |
|                        |           |                                              | hHC014922        | ANKRD32  | NM_032290    | 0.84                                             |
|                        |           |                                              | hHA033054        | CDC27    | NM_001114091 | 0.81                                             |
|                        |           |                                              | hHA034481        | KCNH7    | NM_033272    | 0.83                                             |
|                        |           |                                              | hHC027005        | THRAP3   | NM_005119    | 0.85                                             |
|                        |           |                                              | hHC006628        | SLC36A4  | NM_152313    | 0.82                                             |
|                        |           |                                              | hHR013252        | C20orf94 | NM_001009608 | 0.82                                             |
|                        |           |                                              | hHC020751        | SWAP70   | NM_015055    | 0.81                                             |
|                        |           |                                              | hHC008475        | KCNH7    | NM_033272    | 0.85                                             |
|                        |           |                                              | hHA038715        | NARG1L   | NM_024561    | 0.82                                             |
|                        |           |                                              | hHR004083        | H2AFV    | NM_012412    | 0.88                                             |
|                        |           |                                              | hHC004659        | PCDHB9   | NM_019119    | 0.82                                             |
|                        |           |                                              | hHA032979        | TFAM     | NM_003201    | 0.84                                             |
|                        |           |                                              | hHA034359        | TFAM     | NM_003201    | 0.82                                             |
|                        |           |                                              | hHC008174        | CXorf38  | AK095710     | 0.83                                             |
|                        |           |                                              | hHA033806        | ARID4B   | NM_016374    | 0.85                                             |
|                        |           |                                              | hHC007262        | BRUNOL6  | NM_052840    | 0.82                                             |
|                        |           |                                              | hHR005617        | AAK1     | NM_014911    | 0.84                                             |
|                        |           |                                              | hHC016573        | LDB1     | NM_003893    | 0.82                                             |
|                        |           |                                              | hHA035197        | RAD50    | NM_005732    | 0.81                                             |
|                        |           |                                              | hHC010825        | CBX5     | NM_001127322 | 0.82                                             |
| CZ (SRF) Meta-analysis | hHC016218 | SRR                                          | hHC016218        | SRR      | NM_021947    | 1.00                                             |
| CZ (SRF) Meta-analysis | hHC010439 | AKT1                                         | hHC010439        | AKT1     | NM_005163    | 1.00                                             |
| CZ (SRF) Meta-analysis | hHC020459 | TCF4                                         | hHC020459        | TCF4     | NM_001083962 | 1.00                                             |
| CZ (SRF) Meta-analysis | hHA035123 | DTNBP1                                       | hHA035123        | DTNBP1   | NM_183040    | 1.00                                             |
| CZ (SRF) Meta-analysis | hHC001802 | ZNF804A                                      | hHC001802        | ZNF804A  | NM_194250    | 1.00                                             |
| CZ (SRF) Meta-analysis | hHC015904 | MTHFR                                        | hHC015904        | MTHFR    | NM_005957    | 1.00                                             |
| SCZ (PGC) GWAS         | hHC012518 | AKT3                                         | hHC012518        | AKT3     | NM_005465    | 1.00                                             |
| SCZ (PGC) GWAS         | hHR006410 | ARL3                                         | hHR030183        | RABL2B   | NM_001130921 | 0.81                                             |
| SCZ (PGC) GWAS         | ARL3      | NM_004311                                    | hHR006410        | ARL3     | NM_004311    | 1.00                                             |

Table S4 Coexpression

| Gene Set       | Probe     | Pre-natally enriched Disease-associated Gene | Correlated Probe | Gene      | Accession    | Pearson's Correlation Coefficient (RIN Adjusted) |
|----------------|-----------|----------------------------------------------|------------------|-----------|--------------|--------------------------------------------------|
| SCZ (PGC) GWAS | hHC010261 | AS3MT                                        | hHC029136        | PTTG1     | NM_004219    | 0.82                                             |
|                |           |                                              | hHC003228        | WDR67     | NM_145647    | 0.80                                             |
|                |           |                                              | hHC009468        | MCM3      | NM_002388    | 0.85                                             |
|                |           |                                              | hHR001920        | SOX21     | NM_007084    | 0.83                                             |
|                |           |                                              | hHC022115        | TP53I13   | NM_138349    | 0.82                                             |
|                |           |                                              | hHC014134        | BCL2L12   | NM_138639    | 0.83                                             |
|                |           |                                              | hHC010030        | MTMR11    | NM_181873    | 0.80                                             |
|                |           |                                              | hHC006214        | NMU       | NM_006681    | 0.83                                             |
|                |           |                                              | hHC004018        | BRCA1     | NM_007295    | 0.81                                             |
|                |           |                                              | hHC007762        | CDCA5     | NM_080668    | 0.85                                             |
|                |           |                                              | hHR016126        | RGAG4     | NM_001024455 | 0.80                                             |
|                |           |                                              | hHC020830        | GMNN      | NM_015895    | 0.86                                             |
|                |           |                                              | hHC009225        | AKNA      | NM_030767    | 0.82                                             |
|                |           |                                              | hHR004929        | SMAD5     | NM_001001419 | 0.83                                             |
|                |           |                                              | hHR028665        | CR625830  | CR625830     | 0.83                                             |
|                |           |                                              | hHR014301        | C9orf119  | NM_001040011 | 0.86                                             |
|                |           |                                              | hHC008264        | H2AFX     | NM_002105    | 0.88                                             |
|                |           |                                              | hHR019400        | RNASEH2C  | NM_032193    | 0.87                                             |
|                |           |                                              | hHC007628        | RFX2      | NM_000635    | 0.85                                             |
|                |           |                                              | hHC009920        | RFC4      | NM_181573    | 0.81                                             |
|                |           |                                              | hHC022400        | SMO       | NM_005631    | 0.80                                             |
|                |           |                                              | hHC015044        | C17orf101 | NM_175902    | 0.83                                             |
|                |           |                                              | hHC027620        | RNASEH2C  | NM_032193    | 0.85                                             |
|                |           |                                              | hHE041072        | STK17B    | NM_004226    | 0.81                                             |
|                |           |                                              | hHC018835        | NDUFA7    | NM_005001    | 0.81                                             |
|                |           |                                              | hHC024103        | NUDT1     | NM_198949    | 0.80                                             |
|                |           |                                              | hHC004459        | CLGN      | NM_001130675 | 0.82                                             |
|                |           |                                              | hHC009559        | FAM111A   | NM_001142520 | 0.82                                             |
|                |           |                                              | hHC026275        | DCI       | NM_001919    | 0.83                                             |
|                |           |                                              | hHC004699        | TCF7L2    | BX648364     | 0.84                                             |
|                |           |                                              | hHC004014        | BMP7      | NM_001719    | 0.84                                             |
|                |           |                                              | hHR018234        | CHAF1A    | NM_005483    | 0.81                                             |
|                |           |                                              | hHC018426        | IFI27L2   | NM_032036    | 0.84                                             |
|                |           |                                              | hHC009617        | TUBB6     | NM_032525    | 0.83                                             |
|                |           |                                              | hHE042545        | CENPN     | NM_001100624 | 0.85                                             |
|                |           |                                              | hHC023741        | SHFM1     | NM_006304    | 0.81                                             |
|                |           |                                              | hHC004289        | NOTCH2    | NM_024408    | 0.83                                             |
|                |           |                                              | hHC015605        | NAGA      | NM_000262    | 0.81                                             |
|                |           |                                              | hHC016577        | CCNB1     | NM_031966    | 0.84                                             |
|                |           |                                              | hHC020993        | HADH      | NM_005327    | 0.82                                             |
|                |           |                                              | hHC013913        | EPHB4     | NM_004444    | 0.81                                             |
|                |           |                                              | hHC015353        | XYLT2     | NM_022167    | 0.82                                             |
|                |           |                                              | hHC006208        | SPAG5     | NM_006461    | 0.82                                             |
|                |           |                                              | hHC008212        | DNMBP     | NM_015221    | 0.90                                             |

Table S4 Coexpression

| Gene Set       | Probe     | Pre-natally enriched Disease-associated Gene | Correlated Probe | Gene      | Accession    | Pearson's Correlation Coefficient (RIN Adjusted) |
|----------------|-----------|----------------------------------------------|------------------|-----------|--------------|--------------------------------------------------|
|                |           |                                              | hHC020032        | REEP4     | NM_025232    | 0.88                                             |
|                |           |                                              | hHC011224        | ZNRD1     | NM_170783    | 0.86                                             |
|                |           |                                              | hHC009603        | FAM83D    | NM_030919    | 0.84                                             |
|                |           |                                              | hHE042447        | BX097999  | BX097999     | 0.82                                             |
|                |           |                                              | hHC023847        | CASP7     | NM_033338    | 0.83                                             |
|                |           |                                              | hHC027387        | TULP3     | NM_003324    | 0.85                                             |
|                |           |                                              | hHC004851        | ITGB3BP   | NM_014288    | 0.84                                             |
|                |           |                                              | hHR018207        | HINT2     | NM_032593    | 0.83                                             |
|                |           |                                              | hHC006135        | FAM117A   | NM_030802    | 0.80                                             |
|                |           |                                              | hHC026199        | CDKN3     | NM_005192    | 0.84                                             |
|                |           |                                              | hHC028599        | RPA3      | NM_002947    | 0.82                                             |
|                |           |                                              | hHR003398        | NOTCH1    | NM_017617    | 0.81                                             |
|                |           |                                              | hHC029222        | CKS2      | NM_001827    | 0.86                                             |
|                |           |                                              | hHC013214        | ATPAF2    | NM_145691    | 0.87                                             |
|                |           |                                              | hHC007178        | MCM6      | NM_005915    | 0.80                                             |
|                |           |                                              | hHC017366        | MTCP1     | NM_014221    | 0.85                                             |
|                |           |                                              | hHR003949        | MYBL1     | NM_001080416 | 0.83                                             |
|                |           |                                              | hHC015961        | TRIM21    | NM_003141    | 0.83                                             |
|                |           |                                              | hHC007261        | RNASE4    | NM_002937    | 0.81                                             |
|                |           |                                              | hHC009265        | SLC9A3R1  | NM_004252    | 0.87                                             |
|                |           |                                              | hHC012913        | CHST14    | NM_130468    | 0.87                                             |
|                |           |                                              | hHC015229        | HMGB2     | NM_002129    | 0.82                                             |
|                |           |                                              | hHC016861        | TRIM56    | NM_030961    | 0.82                                             |
|                |           |                                              | hHC027997        | PTTG3     | NR_002734    | 0.86                                             |
|                |           |                                              | hHC030397        | SAP30     | NM_003864    | 0.84                                             |
|                |           |                                              | hHC002281        | NR2E1     | NM_003269    | 0.84                                             |
|                |           |                                              | hHC004117        | PPIL5     | NM_152329    | 0.82                                             |
|                |           |                                              | hHC006025        | FGGY      | NM_001113411 | 0.82                                             |
|                |           |                                              | hHC006313        | CRB1      | NM_201253    | 0.81                                             |
|                |           |                                              | hHC010261        | AS3MT     | NM_020682    | 1.00                                             |
|                |           |                                              | hHR011689        | KCTD9     | NM_017634    | 0.84                                             |
|                |           |                                              | hHC027913        | CDYL      | NM_004824    | 0.86                                             |
| SCZ (PGC) GWAS | hHC005884 | C10orf25                                     | hHC005884        | C10orf25  | NM_001039380 | 1.00                                             |
| SCZ (PGC) GWAS | hHC008880 | C12orf65                                     | hHC008880        | C12orf65  | NM_152269    | 1.00                                             |
| SCZ (PGC) GWAS | hHC008533 | C2orf60                                      | hHC008533        | C2orf60   | NM_001039693 | 1.00                                             |
| SCZ (PGC) GWAS | hHR021294 | CEP170                                       | hHR021294        | CEP170    | NM_014812    | 1.00                                             |
| SCZ (PGC) GWAS | hHA035949 | CNNM2                                        | hHR010176        | DLGAP1    | AK316099     | 0.82                                             |
|                |           |                                              | hHR001762        | LOC158301 | AK057958     | 0.84                                             |
|                |           |                                              | hHA035949        | CNNM2     | NM_199077    | 1.00                                             |
|                |           |                                              | hHR016299        | RTN3      | NM_201428    | 0.82                                             |
|                |           |                                              | hHR009542        | SPTBN1    | AB209551     | 0.87                                             |
| SCZ (PGC) GWAS | hHC017657 | GLT8D1                                       | hHA037103        | ZNF3      | NM_032924    | 0.80                                             |
|                |           |                                              | hHA035253        | USP14     | NM_005151    | 0.80                                             |
|                |           |                                              | hHA039140        | SNX2      | NM_003100    | 0.88                                             |

Table S4 Coexpression

| Gene Set       | Probe     | Pre-natally enriched Disease-associated Gene | Correlated Probe | Gene     | Accession    | Pearson's Correlation Coefficient (RIN Adjusted) |
|----------------|-----------|----------------------------------------------|------------------|----------|--------------|--------------------------------------------------|
|                |           |                                              | hHA039847        | CNOT1    | NM_016284    | 0.81                                             |
|                |           |                                              | hHA035947        | SPTLC1   | NM_006415    | 0.87                                             |
|                |           |                                              | hHA036547        | TRO      | NM_001039705 | 0.83                                             |
|                |           |                                              | hHA034363        | YME1L1   | NM_139312    | 0.85                                             |
|                |           |                                              | hHA037435        | GART     | NM_001136005 | 0.81                                             |
|                |           |                                              | hHC017657        | GLT8D1   | NM_001010983 | 1.00                                             |
|                |           |                                              | hCT001156        | OCRL     | NM_000276    | 0.81                                             |
|                |           |                                              | hCT001287        | OCRL     | AK226116     | 0.82                                             |
|                |           |                                              | hHC017161        | ZNF226   | NM_001032372 | 0.84                                             |
| SCZ (PGC) GWAS | hHC018912 | LPAR2                                        | hHC018912        | LPAR2    | NM_004720    | 1.00                                             |
| SCZ (PGC) GWAS | hHA035698 | MMP16                                        | hHA038808        | ERBB2IP  | NM_018695    | 0.81                                             |
|                |           |                                              | hHA033948        | INPP5F   | NM_014937    | 0.82                                             |
|                |           |                                              | hHA035698        | MMP16    | NM_005941    | 1.00                                             |
|                |           |                                              | hHC012775        | FAM120C  | NM_017848    | 0.82                                             |
|                |           |                                              | hHC024247        | PRRC1    | NM_130809    | 0.81                                             |
|                |           |                                              | hHC019374        | TGFBR1   | NM_004612    | 0.82                                             |
| SCZ (PGC) GWAS | hHC002303 | MPHOSPH9                                     | hHC015671        | WHSC1    | NM_133330    | 0.81                                             |
|                |           |                                              | hHC002303        | MPHOSPH9 | NM_022782    | 1.00                                             |
|                |           |                                              | hHC003923        | KIF11    | NM_004523    | 0.84                                             |
|                |           |                                              | hHC008266        | HMMR     | NM_001142556 | 0.84                                             |
|                |           |                                              | hHR011637        | AK095498 | AK095498     | 0.81                                             |
|                |           |                                              | hHC029781        | NEK2     | NM_002497    | 0.84                                             |
|                |           |                                              | hHR030128        | OSTCL    | NM_145303    | 0.81                                             |
|                |           |                                              | hHA036737        | UBE2C    | NM_181799    | 0.83                                             |
|                |           |                                              | hHC014681        | DTL      | NM_016448    | 0.80                                             |
|                |           |                                              | hHA035403        | SYNE2    | NM_182914    | 0.81                                             |
|                |           |                                              | hHA039446        | NUF2     | NM_145697    | 0.84                                             |
| SCZ (PGC) GWAS | hHC008161 | NCAN                                         | hHC008161        | NCAN     | NM_004386    | 1.00                                             |
| SCZ (PGC) GWAS | hHE041640 | NT5C2                                        | hHE041640        | NT5C2    | NM_012229    | 1.00                                             |
| SCZ (PGC) GWAS | hHC024330 | NT5DC2                                       | hHC024330        | NT5DC2   | NM_022908    | 1.00                                             |
| SCZ (PGC) GWAS | hHC008716 | NUCB2                                        | hHC008716        | NUCB2    | AK097398     | 1.00                                             |
| SCZ (PGC) GWAS | hHC024103 | NUDT1                                        | hHC014134        | BCL2L12  | NM_138639    | 0.82                                             |
|                |           |                                              | hHR019400        | RNASEH2C | NM_032193    | 0.86                                             |
|                |           |                                              | hHC027620        | RNASEH2C | NM_032193    | 0.84                                             |
|                |           |                                              | hHC024103        | NUDT1    | NM_198949    | 1.00                                             |
|                |           |                                              | hHC020863        | PXMP2    | NM_018663    | 0.81                                             |
|                |           |                                              | hHC026275        | DCI      | NM_001919    | 0.83                                             |
|                |           |                                              | hHC021775        | CHCHD5   | NM_032309    | 0.84                                             |
|                |           |                                              | hHC014490        | SSSCA1   | NM_006396    | 0.82                                             |
|                |           |                                              | hHR021317        | CYBA     | NM_000101    | 0.80                                             |
|                |           |                                              | hHC019133        | FKBPL    | NM_022110    | 0.85                                             |
|                |           |                                              | hHC023741        | SHFM1    | NM_006304    | 0.83                                             |
|                |           |                                              | hHC022169        | C1orf144 | NM_001114600 | 0.85                                             |
|                |           |                                              | hHC032284        | DTYMK    | NM_012145    | 0.85                                             |

Table S4 Coexpression

| Gene Set       | Probe     | Pre-natally enriched Disease-associated Gene | Correlated Probe | Gene     | Accession    | Pearson's Correlation Coefficient (RIN Adjusted) |
|----------------|-----------|----------------------------------------------|------------------|----------|--------------|--------------------------------------------------|
|                |           |                                              | hHC020032        | REEP4    | NM_025232    | 0.80                                             |
|                |           |                                              | hHC011224        | ZNRD1    | NM_170783    | 0.86                                             |
|                |           |                                              | hHC018782        | DCPS     | NM_014026    | 0.82                                             |
|                |           |                                              | hHC012266        | WDR51A   | NM_015426    | 0.81                                             |
|                |           |                                              | hHC017366        | MTCP1    | NM_014221    | 0.82                                             |
|                |           |                                              | hHA039530        | TRPT1    | NM_001033678 | 0.85                                             |
|                |           |                                              | hHA035545        | CDK4     | NM_000075    | 0.85                                             |
|                |           |                                              | hHC010261        | AS3MT    | NM_020682    | 0.80                                             |
| SCZ (PGC) GWAS | hHC007983 | PBRM1                                        | hHC007983        | PBRM1    | NM_018313    | 1.00                                             |
| SCZ (PGC) GWAS | hHC009226 | PBX4                                         | hHC009226        | PBX4     | NM_025245    | 1.00                                             |
| SCZ (PGC) GWAS | hHR027831 | PCGF6                                        | hHR027831        | PCGF6    | NM_001011663 | 1.00                                             |
| SCZ (PGC) GWAS | hHR008588 | PDCD11                                       | hHR008588        | PDCD11   | NM_014976    | 1.00                                             |
| SCZ (PGC) GWAS | hHC012392 | PIK3C2A                                      | hHC010032        | CHD2     | NM_001271    | 0.83                                             |
|                |           |                                              | hCT001500        | RB1      | NM_000321    | 0.80                                             |
|                |           |                                              | hHC001918        | KIAA0528 | NM_014802    | 0.83                                             |
|                |           |                                              | hHC012392        | PIK3C2A  | NM_002645    | 1.00                                             |
| SCZ (PGC) GWAS | hHA034577 | PPP2R3C                                      | hHA034577        | PPP2R3C  | NM_017917    | 1.00                                             |
| SCZ (PGC) GWAS | hHC002591 | SDCCAG8                                      | hHC002591        | SDCCAG8  | NM_006642    | 1.00                                             |
| SCZ (PGC) GWAS | hHC010043 | SFXN2                                        | hHR003000        | CDK6     | NM_001259    | 0.82                                             |
|                |           |                                              | hHC031104        | CDC20    | NM_001255    | 0.85                                             |
|                |           |                                              | hHC007043        | ARL6IP6  | NM_152522    | 0.84                                             |
|                |           |                                              | hHC010043        | SFXN2    | NM_178858    | 1.00                                             |
|                |           |                                              | hHE041914        | AK123765 | AK123765     | 0.85                                             |
|                |           |                                              | hHC004018        | BRCA1    | NM_007295    | 0.82                                             |
|                |           |                                              | hHC003297        | DACH1    | NM_080759    | 0.85                                             |
|                |           |                                              | hHR029265        | CDC20    | BE836833     | 0.80                                             |
|                |           |                                              | hHC018812        | MCM2     | NM_004526    | 0.82                                             |
|                |           |                                              | hHR007303        | FLJ11710 | AK021772     | 0.84                                             |
|                |           |                                              | hHC023143        | TRAIP    | NM_005879    | 0.84                                             |
|                |           |                                              | hHC024931        | TJAP1    | NM_080604    | 0.80                                             |
|                |           |                                              | hHC027319        | TGIF2    | NM_021809    | 0.82                                             |
|                |           |                                              | hHC008143        | ZNF491   | AK096593     | 0.83                                             |
|                |           |                                              | hHC011874        | IGF2BP1  | NM_006546    | 0.81                                             |
|                |           |                                              | hHC006929        | MLF1IP   | NM_024629    | 0.84                                             |
|                |           |                                              | hHA038801        | DACH1    | NM_080759    | 0.83                                             |
|                |           |                                              | hHA039557        | DACH1    | NM_080759    | 0.85                                             |
|                |           |                                              | hHC015197        | PHF19    | NM_015651    | 0.84                                             |
|                |           |                                              | hHC004469        | PHF21B   | NM_138415    | 0.81                                             |
|                |           |                                              | hHC006509        | E2F8     | NM_024680    | 0.83                                             |
|                |           |                                              | hHA036365        | DACH1    | NM_080759    | 0.82                                             |
|                |           |                                              | hHC003148        | CEP55    | NM_018131    | 0.81                                             |
|                |           |                                              | hHR016888        | CBX2     | NM_005189    | 0.82                                             |
|                |           |                                              | hHC003267        | COL9A1   | NM_001851    | 0.81                                             |
|                |           |                                              | hHC008847        | NUF2     | NM_145697    | 0.82                                             |



Table S4 Coexpression

| Gene Set       | Probe     | Pre-natally enriched Disease-associated Gene | Correlated Probe | Gene      | Accession    | Pearson's Correlation Coefficient (RIN Adjusted) |
|----------------|-----------|----------------------------------------------|------------------|-----------|--------------|--------------------------------------------------|
|                |           |                                              | hHC027267        | STIL      | NM_001048166 | 0.85                                             |
|                |           |                                              | hHR029571        | C9orf140  | NM_178448    | 0.81                                             |
|                |           |                                              | hHC023199        | IMPA2     | NM_014214    | 0.81                                             |
|                |           |                                              | hHR015831        | EPR1      | NM_001012271 | 0.82                                             |
|                |           |                                              | hHC002402        | BUB1B     | NM_001211    | 0.80                                             |
|                |           |                                              | hHC009506        | POLE2     | NM_002692    | 0.84                                             |
|                |           |                                              | hHR006230        | FOXN4     | NM_213596    | 0.81                                             |
|                |           |                                              | hHC007597        | HJURP     | NM_018410    | 0.81                                             |
|                |           |                                              | hHA036721        | CEP192    | NM_032142    | 0.81                                             |
| SCZ (PGC) GWAS | hHA034238 | TAF5                                         | hHA034238        | TAF5      | NM_006951    | 1.00                                             |
| SCZ (PGC) GWAS | hHC020459 | TCF4                                         | hHC020459        | TCF4      | NM_001083962 | 1.00                                             |
| SCZ (PGC) GWAS | hHC025830 | WDR82                                        | hHC017134        | NDRG3     | NM_032013    | 0.81                                             |
|                |           |                                              | hHC025830        | WDR82     | NM_025222    | 1.00                                             |
|                |           |                                              | hHA040084        | PCDHA1    | NM_018900    | 0.81                                             |
| SCZ (PGC) GWAS | hHR029739 | ZEB2                                         | hHR029739        | ZEB2      | NM_014795    | 1.00                                             |
| SCZ (PGC) GWAS | hHR001783 | ZSWIM6                                       | hHC001966        | ZSWIM6    | NM_020928    | 0.91                                             |
|                |           |                                              | hHR003490        | EIF3J     | NM_003758    | 0.84                                             |
|                |           |                                              | hHC006549        | DOCK7     | NM_033407    | 0.81                                             |
|                |           |                                              | hHC005313        | UCKL1     | NM_017859    | 0.84                                             |
|                |           |                                              | hHC002924        | CNOT4     | NM_013316    | 0.87                                             |
|                |           |                                              | hHC004063        | EIF3J     | NM_003758    | 0.81                                             |
|                |           |                                              | hHR029131        | UBE2E4P   | AF136176     | 0.85                                             |
|                |           |                                              | hHR001783        | ZSWIM6    | NM_020928    | 1.00                                             |
|                |           |                                              | hHC003810        | ZBTB6     | NM_006626    | 0.82                                             |
|                |           |                                              | hHC002837        | KIAA2026  | NM_001017969 | 0.81                                             |
|                |           |                                              | hHC002260        | C14orf104 | NM_018139    | 0.82                                             |
|                |           |                                              | hHR030412        | BZW1      | NM_014670    | 0.83                                             |
|                |           |                                              | hHC004443        | PHF14     | NM_001007157 | 0.81                                             |
|                |           |                                              | hHC030387        | NDUF2F2   | NM_174889    | 0.81                                             |
|                |           |                                              | hHC005101        | YAF2      | NM_005748    | 0.83                                             |
| SCZ CNV        | hHC025769 | ARVCF                                        | hHC025769        | ARVCF     | NM_001670    | 1.00                                             |
| SCZ CNV        | hHC008219 | ASPHD1                                       | hHC008219        | ASPHD1    | AF070642     | 1.00                                             |
|                |           |                                              | hHC011324        | MAPK4     | NM_002747    | 0.84                                             |
|                |           |                                              | hHC028147        | PTPN2     | NM_080422    | 0.85                                             |
|                |           |                                              | hHC004854        | ABHD7     | NM_173567    | 0.83                                             |
|                |           |                                              | hHA034525        | ASPHD1    | AF070642     | 0.85                                             |
| SCZ CNV        | hHC014098 | BCL9                                         | hHC014098        | BCL9      | NM_004326    | 1.00                                             |
| SCZ CNV        | hHC013809 | C16orf53                                     | hHR016547        | AK027209  | AK027209     | 0.80                                             |
|                |           |                                              | hHC013809        | C16orf53  | NM_024516    | 1.00                                             |
|                |           |                                              | hHC013455        | RPGR      | NM_000328    | 0.83                                             |
|                |           |                                              | hHC006601        | EFS       | NM_005864    | 0.82                                             |
| SCZ CNV        | hHC004040 | CDC45L                                       | hHC003564        | ZNF367    | NM_153695    | 0.85                                             |
|                |           |                                              | hHC014412        | TGIF1     | NM_170695    | 0.81                                             |
|                |           |                                              | hHC021144        | TPX2      | NM_012112    | 0.83                                             |

Table S4 Coexpression

| Gene Set | Probe | Pre-natally enriched Disease-associated Gene | Correlated Probe | Gene     | Accession    | Pearson's Correlation Coefficient (RIN Adjusted) |
|----------|-------|----------------------------------------------|------------------|----------|--------------|--------------------------------------------------|
|          |       |                                              | hHC025176        | SLMO2    | NM_016045    | 0.81                                             |
|          |       |                                              | hHC029136        | PTTG1    | NM_004219    | 0.85                                             |
|          |       |                                              | hHA034980        | CDC2     | NM_001130829 | 0.88                                             |
|          |       |                                              | hHC031104        | CDC20    | NM_001255    | 0.81                                             |
|          |       |                                              | hHA038688        | NUSAP1   | NM_016359    | 0.88                                             |
|          |       |                                              | hHC014123        | CENPO    | NM_024322    | 0.83                                             |
|          |       |                                              | hHC026699        | RRM2     | NM_001034    | 0.81                                             |
|          |       |                                              | hHC028811        | UBE2C    | NM_181802    | 0.91                                             |
|          |       |                                              | hHA038027        | TYMS     | NM_001071    | 0.90                                             |
|          |       |                                              | hHC007043        | ARL6IP6  | NM_152522    | 0.84                                             |
|          |       |                                              | hHC013295        | FOXM1    | NM_202002    | 0.89                                             |
|          |       |                                              | hHC020495        | PRC1     | NM_003981    | 0.87                                             |
|          |       |                                              | hHC023951        | AURKA    | NM_198433    | 0.90                                             |
|          |       |                                              | hHC004775        | FAM54A   | NM_001099286 | 0.83                                             |
|          |       |                                              | hHC007271        | CENPK    | NM_022145    | 0.84                                             |
|          |       |                                              | hHC014459        | CCNA2    | NM_001237    | 0.88                                             |
|          |       |                                              | hHC024347        | CDC25C   | NM_001790    | 0.87                                             |
|          |       |                                              | hHA037019        | RAD51    | NM_002875    | 0.87                                             |
|          |       |                                              | hHC002195        | STON1    | NM_006873    | 0.85                                             |
|          |       |                                              | hHR002122        | CEP152   | NM_014985    | 0.88                                             |
|          |       |                                              | hHC002314        | FAM122C  | NM_138819    | 0.83                                             |
|          |       |                                              | hHC004534        | NCAPD3   | NM_015261    | 0.85                                             |
|          |       |                                              | hHR014122        | CENPO    | NM_024322    | 0.82                                             |
|          |       |                                              | hHC029674        | FAM64A   | NM_019013    | 0.93                                             |
|          |       |                                              | hHC005794        | KIAA0101 | NM_014736    | 0.94                                             |
|          |       |                                              | hHC015970        | CENPM    | NM_024053    | 0.89                                             |
|          |       |                                              | hHR020686        | MXD3     | NM_031300    | 0.85                                             |
|          |       |                                              | hHA039586        | TYMS     | NM_001071    | 0.91                                             |
|          |       |                                              | hHC011686        | C21orf58 | NM_058180    | 0.81                                             |
|          |       |                                              | hHA038554        | RGS3     | NM_144488    | 0.80                                             |
|          |       |                                              | hHC002590        | CENPF    | NM_016343    | 0.86                                             |
|          |       |                                              | hHC004018        | BRCA1    | NM_007295    | 0.86                                             |
|          |       |                                              | hHC007762        | CDCA5    | NM_080668    | 0.86                                             |
|          |       |                                              | hHC016905        | CDK2     | NM_001798    | 0.84                                             |
|          |       |                                              | hHC021045        | CDCA8    | NM_018101    | 0.95                                             |
|          |       |                                              | hHC025653        | MND1     | NM_032117    | 0.87                                             |
|          |       |                                              | hHR012993        | FZD2     | NM_001466    | 0.85                                             |
|          |       |                                              | hHC024705        | KNTC1    | NM_014708    | 0.85                                             |
|          |       |                                              | hHR025293        | RPSAP58  | NR_003662    | 0.81                                             |
|          |       |                                              | hHC004389        | WEE1     | NM_003390    | 0.81                                             |
|          |       |                                              | hHC006489        | TYMS     | NM_001071    | 0.83                                             |
|          |       |                                              | hHR017349        | MAD2L1   | NM_002358    | 0.90                                             |
|          |       |                                              | hHR025605        | CDC25A   | NM_001789    | 0.86                                             |
|          |       |                                              | hHC007965        | C21orf45 | NM_018944    | 0.85                                             |

Table S4 Coexpression

| Gene Set | Probe | Pre-natally enriched Disease-associated Gene | Correlated Probe | Gene        | Accession    | Pearson's Correlation Coefficient (RIN Adjusted) |
|----------|-------|----------------------------------------------|------------------|-------------|--------------|--------------------------------------------------|
|          |       |                                              | hHC027729        | DLGAP5      | NM_014750    | 0.86                                             |
|          |       |                                              | hHR029265        | (CDC20),    | BE836833     | 0.92                                             |
|          |       |                                              | hHC002420        | CDC14A      | NM_003672    | 0.84                                             |
|          |       |                                              | hHR003572        | RTKN2       | NM_145307    | 0.92                                             |
|          |       |                                              | hHC004040        | CDC45L      | NM_003504    | 1.00                                             |
|          |       |                                              | hHC008264        | H2AFX       | NM_002105    | 0.82                                             |
|          |       |                                              | hHC008876        | C15orf42    | NM_152259    | 0.89                                             |
|          |       |                                              | hHC014252        | POLA2       | NM_002689    | 0.84                                             |
|          |       |                                              | hHC022400        | SMO         | NM_005631    | 0.85                                             |
|          |       |                                              | hHA034304        | CDKN3       | NM_005192    | 0.86                                             |
|          |       |                                              | hHC016868        | CDCA7       | NM_031942    | 0.87                                             |
|          |       |                                              | hHR026084        | NCRNA000095 | NR_024348    | 0.83                                             |
|          |       |                                              | hHC029252        | IGF2BP3     | NM_006547    | 0.82                                             |
|          |       |                                              | hHR002672        | KIF11       | NM_004523    | 0.90                                             |
|          |       |                                              | hHC009680        | ZWINT       | NM_032997    | 0.83                                             |
|          |       |                                              | hHC018812        | MCM2        | NM_004526    | 0.88                                             |
|          |       |                                              | hHC025244        | MXD3        | NM_031300    | 0.83                                             |
|          |       |                                              | hHC014803        | RNASEH2A    | NM_006397    | 0.84                                             |
|          |       |                                              | hHC014791        | CDC2        | NM_001130829 | 0.88                                             |
|          |       |                                              | hHC024295        | MCM5        | NM_006739    | 0.87                                             |
|          |       |                                              | hHC027187        | CTDSP2      | NM_005730    | 0.80                                             |
|          |       |                                              | hHC031507        | UHRF1       | NM_013282    | 0.86                                             |
|          |       |                                              | hHC003499        | LIPG        | NM_006033    | 0.82                                             |
|          |       |                                              | hHC004255        | C5orf34     | NM_198566    | 0.87                                             |
|          |       |                                              | hHC007903        | KIF24       | NM_194313    | 0.85                                             |
|          |       |                                              | hHC009163        | C1orf112    | NM_018186    | 0.92                                             |
|          |       |                                              | hHC009931        | TCF19       | NM_007109    | 0.84                                             |
|          |       |                                              | hHC021451        | TROAP       | NM_005480    | 0.86                                             |
|          |       |                                              | hHC022591        | OIP5        | NM_007280    | 0.92                                             |
|          |       |                                              | hHC009559        | FAM111A     | NM_001142520 | 0.84                                             |
|          |       |                                              | hHR017719        | CCNB2       | NM_004701    | 0.88                                             |
|          |       |                                              | hHC027319        | TGIF2       | NM_021809    | 0.84                                             |
|          |       |                                              | hHR030487        | FAM60A      | NM_001135811 | 0.85                                             |
|          |       |                                              | hHA035671        | CHEK2       | NM_001005735 | 0.85                                             |
|          |       |                                              | hHC003451        | SFRP2       | NM_003013    | 0.85                                             |
|          |       |                                              | hHA037339        | ACAA2       | NM_006111    | 0.81                                             |
|          |       |                                              | hHR013734        | DTL         | NM_016448    | 0.91                                             |
|          |       |                                              | hHR026706        | SAP30       | NM_003864    | 0.81                                             |
|          |       |                                              | hHC006558        | DLEU2       | CR625878     | 0.84                                             |
|          |       |                                              | hHC011850        | EME1        | NM_152463    | 0.90                                             |
|          |       |                                              | hHA034122        | PPIL5       | NM_152329    | 0.88                                             |
|          |       |                                              | hHC001986        | IL33        | NM_033439    | 0.86                                             |
|          |       |                                              | hHR004098        | SMC4        | NM_005496    | 0.88                                             |
|          |       |                                              | hHR001818        | C11orf82    | NM_145018    | 0.85                                             |

Table S4 Coexpression

| Gene Set | Probe | Pre-natally enriched Disease-associated Gene | Correlated Probe | Gene      | Accession    | Pearson's Correlation Coefficient (RIN Adjusted) |
|----------|-------|----------------------------------------------|------------------|-----------|--------------|--------------------------------------------------|
|          |       |                                              | hHC011418        | TIMELESS  | NM_003920    | 0.86                                             |
|          |       |                                              | hHC018606        | C12orf48  | NM_017915    | 0.87                                             |
|          |       |                                              | hHA039066        | CDCA4     | NM_017955    | 0.85                                             |
|          |       |                                              | hHR005105        | RAD51AP1  | NM_001130862 | 0.92                                             |
|          |       |                                              | hHC006929        | MLF1IP    | NM_024629    | 0.88                                             |
|          |       |                                              | hHC006917        | TTK       | NM_003318    | 0.91                                             |
|          |       |                                              | hHC020837        | GINS2     | NM_016095    | 0.87                                             |
|          |       |                                              | hHA033713        | ARHGAP11A | NM_014783    | 0.87                                             |
|          |       |                                              | hHA035921        | RAD51     | NM_002875    | 0.90                                             |
|          |       |                                              | hHA036485        | CDC25C    | NM_001790    | 0.89                                             |
|          |       |                                              | hHC003593        | C6orf167  | NM_198468    | 0.93                                             |
|          |       |                                              | hHC027497        | GINS4     | NM_032336    | 0.88                                             |
|          |       |                                              | hHA033053        | C14orf94  | NM_017815    | 0.80                                             |
|          |       |                                              | hHC006593        | SMC4      | NM_005496    | 0.92                                             |
|          |       |                                              | hHC016577        | CCNB1     | NM_031966    | 0.84                                             |
|          |       |                                              | hHA033857        | NUSAP1    | NM_016359    | 0.93                                             |
|          |       |                                              | hHA035585        | FST       | NM_006350    | 0.82                                             |
|          |       |                                              | hHA036737        | UBE2C     | NM_181799    | 0.80                                             |
|          |       |                                              | hHC007277        | STK33     | NM_030906    | 0.82                                             |
|          |       |                                              | hHC014681        | DTL       | NM_016448    | 0.81                                             |
|          |       |                                              | hHC014704        | CENPN     | NM_001100624 | 0.89                                             |
|          |       |                                              | hHR017092        | NEK2      | NM_002497    | 0.91                                             |
|          |       |                                              | hHC001792        | NUP37     | NM_024057    | 0.83                                             |
|          |       |                                              | hHC014176        | CENPE     | NM_001813    | 0.90                                             |
|          |       |                                              | hHC003160        | KIF15     | NM_020242    | 0.85                                             |
|          |       |                                              | hHC003148        | CEP55     | NM_018131    | 0.88                                             |
|          |       |                                              | hHC021592        | TK1       | NM_003258    | 0.90                                             |
|          |       |                                              | hHA035416        | ITGB3BP   | NM_014288    | 0.85                                             |
|          |       |                                              | hHC001935        | ORC6L     | NM_014321    | 0.81                                             |
|          |       |                                              | hHC008847        | NUF2      | NM_145697    | 0.97                                             |
|          |       |                                              | hHC009603        | FAM83D    | NM_030919    | 0.90                                             |
|          |       |                                              | hHC022563        | PIF1      | NM_025049    | 0.81                                             |
|          |       |                                              | hHC027267        | STIL      | NM_001048166 | 0.90                                             |
|          |       |                                              | hHR017511        | CKS2      | NM_001827    | 0.93                                             |
|          |       |                                              | hHC021243        | KRI1      | NM_023008    | 0.82                                             |
|          |       |                                              | hHA035259        | OIP5      | NM_007280    | 0.89                                             |
|          |       |                                              | hHC003603        | INTU      | NM_015693    | 0.82                                             |
|          |       |                                              | hHC003795        | MELK      | NM_014791    | 0.90                                             |
|          |       |                                              | hHC004851        | ITGB3BP   | NM_014288    | 0.87                                             |
|          |       |                                              | hHC011295        | NUSAP1    | NM_016359    | 0.91                                             |
|          |       |                                              | hHR017427        | SMO       | NM_005631    | 0.80                                             |
|          |       |                                              | hHA038355        | CDCA3     | NM_031299    | 0.86                                             |
|          |       |                                              | hHC010551        | MKI67     | NM_002417    | 0.85                                             |
|          |       |                                              | hHC012087        | RAD51     | NM_002875    | 0.87                                             |

Table S4 Coexpression

| Gene Set | Probe     | Pre-natally enriched Disease-associated Gene | Correlated Probe | Gene     | Accession    | Pearson's Correlation Coefficient (RIN Adjusted) |
|----------|-----------|----------------------------------------------|------------------|----------|--------------|--------------------------------------------------|
|          |           |                                              | hHR015831        | EPR1     | NM_001012271 | 0.92                                             |
|          |           |                                              | hHC026199        | CDKN3    | NM_005192    | 0.80                                             |
|          |           |                                              | hHC002402        | BUB1B    | NM_001211    | 0.86                                             |
|          |           |                                              | hHC003746        | VRK1     | NM_003384    | 0.81                                             |
|          |           |                                              | hHC006926        | NSBP1    | NM_030763    | 0.84                                             |
|          |           |                                              | hHC009506        | POLE2    | NM_002692    | 0.85                                             |
|          |           |                                              | hHC005690        | DEPDC1   | NM_001114120 | 0.83                                             |
|          |           |                                              | hHC018470        | PPIL5    | NM_152329    | 0.81                                             |
|          |           |                                              | hHC020474        | CDCA3    | NM_031299    | 0.89                                             |
|          |           |                                              | hHC027578        | CCNB2    | NM_004701    | 0.92                                             |
|          |           |                                              | hHC029222        | CKS2     | NM_001827    | 0.81                                             |
|          |           |                                              | hHC031718        | CDC20    | NM_001255    | 0.92                                             |
|          |           |                                              | hHR003986        | MCM10    | NM_182751    | 0.95                                             |
|          |           |                                              | hHC016862        | KIF18A   | NM_031217    | 0.92                                             |
|          |           |                                              | hHC019742        | PLCE1    | NM_016341    | 0.82                                             |
|          |           |                                              | hHC025682        | MTA3     | NM_020744    | 0.80                                             |
|          |           |                                              | hHC026750        | BTG3     | NM_001130914 | 0.82                                             |
|          |           |                                              | hHC029426        | DBF4     | NM_006716    | 0.89                                             |
|          |           |                                              | hHR006230        | FOXN4    | NM_213596    | 0.92                                             |
|          |           |                                              | hHC010346        | PIF1     | NM_025049    | 0.85                                             |
|          |           |                                              | hHC023882        | SPC24    | AK075287     | 0.85                                             |
|          |           |                                              | hHC007597        | HJURP    | NM_018410    | 0.94                                             |
|          |           |                                              | hHC020461        | TK1      | NM_003258    | 0.82                                             |
|          |           |                                              | hHR028333        | PTTG3    | NR_002734    | 0.90                                             |
|          |           |                                              | hHC005509        | TRDMT1   | NM_004412    | 0.82                                             |
|          |           |                                              | hHC016069        | E2F2     | NM_004091    | 0.89                                             |
|          |           |                                              | hHC019417        | LOC91431 | NM_001099776 | 0.85                                             |
|          |           |                                              | hHC004849        | NCAPH    | NM_015341    | 0.95                                             |
|          |           |                                              | hHC005725        | BUB1     | NM_004336    | 0.94                                             |
|          |           |                                              | hHC012913        | CHST14   | NM_130468    | 0.85                                             |
|          |           |                                              | hHC016789        | SEMA5B   | NM_001031702 | 0.80                                             |
| SCZ CNV  | hHR025141 | CHRNA7                                       | hHR025141        | CHRNA7   | NM_000746    | 1.00                                             |
| SCZ CNV  | hHA036352 | CLTCL1                                       | hHA036352        | CLTCL1   | NM_007098    | 1.00                                             |
| SCZ CNV  | hHC003582 | CYFIP1                                       | hHC003582        | CYFIP1   | AY763579     | 1.00                                             |
| SCZ CNV  | hHR005214 | DGCR10                                       | hHR005214        | DGCR10   | NR_026651    | 1.00                                             |
| SCZ CNV  | hHC030047 | DGCR5                                        | hHC029747        | PDXDC2   | NR_003610    | 0.81                                             |
|          |           |                                              | hHC030047        | DGCR5    | X91348       | 1.00                                             |
|          |           |                                              | hHC022670        | A2BP1    | NM_018723    | 0.83                                             |
| SCZ CNV  | hHC018376 | DGCR8                                        | hHC018376        | DGCR8    | NM_022720    | 1.00                                             |
| SCZ CNV  | hHC021273 | FAM57B                                       | hHC021273        | FAM57B   | NM_031478    | 1.00                                             |
|          |           |                                              | hHR026756        | TTLL12   | NM_015140    | 0.85                                             |
|          |           |                                              | hHC021087        | LRFN4    | NM_024036    | 0.84                                             |
| SCZ CNV  | hHC029540 | HIC2                                         | hHC029540        | HIC2     | NM_015094    | 1.00                                             |
| SCZ CNV  | hHC025127 | HIRA                                         | hHC025127        | HIRA     | NM_003325    | 1.00                                             |

Table S4 Coexpression

| Gene Set | Probe     | Pre-natally enriched Disease-associated Gene | Correlated Probe | Gene         | Accession | Pearson's Correlation Coefficient (RIN Adjusted) |
|----------|-----------|----------------------------------------------|------------------|--------------|-----------|--------------------------------------------------|
| SCZ CNV  | hHC005831 | LIX1L                                        | hHC005831        | LIX1L        | AK128733  | 1.00                                             |
| SCZ CNV  | hHC019168 | LZTR1                                        | hHC019168        | LZTR1        | NM_006767 | 1.00                                             |
|          |           |                                              | hHC020896        | RP3-402G11.5 | NM_031454 | 0.81                                             |
| SCZ CNV  | hHC010102 | MTMR15                                       | hHC010102        | MTMR15       | NM_014967 | 1.00                                             |
| SCZ CNV  | hHC003863 | NCBP2                                        | hHC003863        | NCBP2        | NM_007362 | 1.00                                             |
| SCZ CNV  | hHA035283 | NRXN1                                        | hHC009943        | CACNA2D1     | NM_000722 | 0.81                                             |
|          |           |                                              | hHC014427        | SLC35F5      | NM_025181 | 0.82                                             |
|          |           |                                              | hHA034405        | USP34        | NM_014709 | 0.85                                             |
|          |           |                                              | hHC019261        | ANKRD28      | NM_015199 | 0.80                                             |
|          |           |                                              | hHC029833        | GNAQ         | NM_002072 | 0.80                                             |
| SCZ CNV  | hHR008719 | PAK2                                         | hHR008719        | PAK2         | NM_002577 | 1.00                                             |
| SCZ CNV  | hHA039366 | PI4KA                                        | hHA039366        | PI4KA        | NM_058004 | 1.00                                             |
| SCZ CNV  | hHC019979 | PPP4C                                        | hHC018696        | KDELR1       | NM_006801 | 0.80                                             |
|          |           |                                              | hHA034332        | MBNL1        | NM_021038 | 0.80                                             |
|          |           |                                              | hHC019979        | PPP4C        | NM_002720 | 1.00                                             |
|          |           |                                              | hHC014351        | TMED7        | NM_181836 | 0.81                                             |
|          |           |                                              | hHA033755        | HERPUD2      | NM_022373 | 0.80                                             |
|          |           |                                              | hHA036513        | FYN          | NM_002037 | 0.84                                             |
|          |           |                                              | hHC030932        | NONO         | NM_007363 | 0.85                                             |
|          |           |                                              | hCT000607        | ACTB         | NM_001101 | 0.85                                             |
|          |           |                                              | hHA033126        | CASC4        | NM_138423 | 0.83                                             |
|          |           |                                              | hHA034506        | MACF1        | NM_012090 | 0.83                                             |
|          |           |                                              | hHC013157        | SEL1L        | NM_005065 | 0.83                                             |
|          |           |                                              | hHR023273        | TOMM20       | NM_014765 | 0.82                                             |
|          |           |                                              | hHC017813        | GDI1         | NM_001493 | 0.83                                             |
| SCZ CNV  | hHC007231 | PRKAB2                                       | hHC004824        | TAPT1        | NM_153365 | 0.81                                             |
|          |           |                                              | hHC005100        | CDH10        | NM_006727 | 0.88                                             |
|          |           |                                              | hHC001872        | CNRIP1       | NM_015463 | 0.80                                             |
|          |           |                                              | hHC006408        | LPL          | NM_000237 | 0.82                                             |
|          |           |                                              | hHC028284        | ACSL4        | NM_022977 | 0.80                                             |
|          |           |                                              | hHR006048        | PCDHA1       | NM_018900 | 0.83                                             |
|          |           |                                              | hHE040931        | CB242912     | CB242912  | 0.80                                             |
|          |           |                                              | hHR020135        | CHD5         | NM_015557 | 0.87                                             |
|          |           |                                              | hHR006047        | PCDHA1       | NM_018900 | 0.84                                             |
|          |           |                                              | hHR007103        | FAM169A      | NM_015566 | 0.85                                             |
|          |           |                                              | hHC012083        | KIAA1377     | NM_020802 | 0.85                                             |
|          |           |                                              | hHC008950        | CCBE1        | NM_133459 | 0.84                                             |
|          |           |                                              | hHR009994        | KALRN        | NM_003947 | 0.83                                             |
|          |           |                                              | hHA034678        | MYLIP        | NM_013262 | 0.86                                             |
|          |           |                                              | hHC008506        | PTPRT        | NM_133170 | 0.88                                             |
|          |           |                                              | hHR030586        | PCDH11X      | NM_032968 | 0.83                                             |
|          |           |                                              | hHR006046        | PCDHA1       | NM_018900 | 0.84                                             |
|          |           |                                              | hHC009694        | FBXO27       | NM_178820 | 0.86                                             |
|          |           |                                              | hHC017266        | CUX2         | NM_015267 | 0.84                                             |

Table S4 Coexpression

| Gene Set | Probe | Pre-natally enriched Disease-associated Gene | Correlated Probe | Gene      | Accession    | Pearson's Correlation Coefficient (RIN Adjusted) |
|----------|-------|----------------------------------------------|------------------|-----------|--------------|--------------------------------------------------|
|          |       |                                              | hHC006933        | BAALC     | NM_024812    | 0.81                                             |
|          |       |                                              | hHR009129        | ZNF706    | NM_001042510 | 0.82                                             |
|          |       |                                              | hHC003777        | NAV3      | NM_014903    | 0.86                                             |
|          |       |                                              | hHC009741        | FGF9      | NM_002010    | 0.82                                             |
|          |       |                                              | hHC005253        | KCND2     | NM_012281    | 0.86                                             |
|          |       |                                              | hHR004605        | THRB      | NM_001128177 | 0.88                                             |
|          |       |                                              | hHC004689        | NECAB1    | NM_022351    | 0.86                                             |
|          |       |                                              | hHR006045        | PCDHA1    | NM_018900    | 0.85                                             |
|          |       |                                              | hHC007220        | ELOVL2    | NM_017770    | 0.79                                             |
|          |       |                                              | hHC025160        | C17orf58  | NM_181656    | 0.82                                             |
|          |       |                                              | hHA035912        | GRM7      | BC136458     | 0.85                                             |
|          |       |                                              | hHC008960        | NKAIN2    | NM_001040214 | 0.83                                             |
|          |       |                                              | hHC010412        | DB519783  | DB519783     | 0.87                                             |
|          |       |                                              | hHR006055        | PCDHA1    | NM_018900    | 0.84                                             |
|          |       |                                              | hHC017683        | SUOX      | NM_000456    | 0.84                                             |
|          |       |                                              | hHC005695        | AJAP1     | NM_018836    | 0.81                                             |
|          |       |                                              | hHC007231        | PRKAB2    | NM_005399    | 1.00                                             |
|          |       |                                              | hHE040843        | CD678534  | CD678534     | 0.84                                             |
|          |       |                                              | hHC006295        | JAZF1     | NM_175061    | 0.82                                             |
|          |       |                                              | hHC008995        | RIMS1     | BC036608     | 0.85                                             |
|          |       |                                              | hHC027511        | FABP3     | NM_004102    | 0.81                                             |
|          |       |                                              | hHC002299        | AKAP7     | NM_016377    | 0.80                                             |
|          |       |                                              | hHR006043        | PCDHA1    | NM_018900    | 0.85                                             |
|          |       |                                              | hHC002214        | DPYD      | NM_000110    | 0.82                                             |
|          |       |                                              | hHC004902        | FAM19A2   | NM_178539    | 0.84                                             |
|          |       |                                              | hHR006054        | PCDHA1    | NM_018900    | 0.81                                             |
|          |       |                                              | hHR006738        | LOC283070 | BC073155     | 0.85                                             |
|          |       |                                              | hHC005898        | AFF2      | NM_002025    | 0.81                                             |
|          |       |                                              | hHC013950        | CHD5      | NM_015557    | 0.81                                             |
|          |       |                                              | hHA033834        | HDAC9     | NM_014707    | 0.80                                             |
|          |       |                                              | hHR005850        | BEAN      | NM_001136106 | 0.83                                             |
|          |       |                                              | hHR006042        | PCDHA1    | NM_018900    | 0.82                                             |
|          |       |                                              | hHR008046        | DERL1     | AY358818     | 0.82                                             |
|          |       |                                              | hHC010734        | MMP24     | NM_006690    | 0.81                                             |
|          |       |                                              | hHR006053        | PCDHA1    | NM_018900    | 0.85                                             |
|          |       |                                              | hHA033893        | KLHL4     | NM_019117    | 0.88                                             |
|          |       |                                              | hHC001865        | RBM24     | NM_153020    | 0.82                                             |
|          |       |                                              | hHC002429        | DNAJC6    | NM_014787    | 0.84                                             |
|          |       |                                              | hHC004361        | LRRC4C    | NM_020929    | 0.90                                             |
|          |       |                                              | hHR028841        | USP6      | NM_004505    | 0.80                                             |
|          |       |                                              | hHR005537        | LPHN3     | NM_015236    | 0.82                                             |
|          |       |                                              | hHR008897        | PLCH2     | NM_014638    | 0.91                                             |
|          |       |                                              | hHE040949        | EY892390  | EY892390     | 0.87                                             |
|          |       |                                              | hHA033869        | NEBL      | NM_006393    | 0.86                                             |

Table S4 Coexpression

| Gene Set | Probe     | Pre-natally enriched Disease-associated Gene | Correlated Probe | Gene      | Accession    | Pearson's Correlation Coefficient (RIN Adjusted) |
|----------|-----------|----------------------------------------------|------------------|-----------|--------------|--------------------------------------------------|
|          |           |                                              | hHC008260        | GRM7      | NM_181874    | 0.86                                             |
|          |           |                                              | hHC007240        | KLHL4     | NM_019117    | 0.83                                             |
|          |           |                                              | hHC004792        | PTCHD1    | NM_173495    | 0.88                                             |
|          |           |                                              | hHR006051        | PCDHA1    | NM_018900    | 0.84                                             |
|          |           |                                              | hHC009615        | L3MBTL3   | NM_032438    | 0.81                                             |
|          |           |                                              | hHR002763        | CACNA1C   | NM_199460    | 0.81                                             |
|          |           |                                              | hHC001634        | BACE1     | NM_012104    | 0.80                                             |
|          |           |                                              | hHR006050        | PCDHA1    | NM_018900    | 0.84                                             |
|          |           |                                              | hHR011906        | RIMBP2    | NM_015347    | 0.83                                             |
|          |           |                                              | hHR002630        | KIAA1107  | NM_015237    | 0.80                                             |
|          |           |                                              | hHC003290        | LOC153364 | NM_203406    | 0.81                                             |
|          |           |                                              | hHC009926        | SH3GL3    | NM_003027    | 0.80                                             |
|          |           |                                              | hHC003698        | FRMD4A    | NM_018027    | 0.83                                             |
|          |           |                                              | hHR001898        | KIAA1239  | NM_001144990 | 0.84                                             |
|          |           |                                              | hHC003050        | ALCAM     | NM_001627    | 0.87                                             |
|          |           |                                              | hHC008234        | LHX6      | NM_014368    | 0.81                                             |
|          |           |                                              | hHC018506        | WWC1      | NM_015238    | 0.81                                             |
|          |           |                                              | hHC002797        | CDH11     | NM_001797    | 0.82                                             |
|          |           |                                              | hHR006049        | PCDHA1    | NM_018900    | 0.83                                             |
|          |           |                                              | hHE040993        | SAMD5     | NM_001030060 | 0.90                                             |
|          |           |                                              | hHC004537        | LRRRC8B   | NM_015350    | 0.84                                             |
|          |           |                                              | hHC005689        | SLC30A10  | NM_018713    | 0.82                                             |
|          |           |                                              | hHC006757        | MYLIP     | NM_013262    | 0.82                                             |
|          |           |                                              | hHA035269        | KLHL4     | NM_019117    | 0.82                                             |
|          |           |                                              | hHE040789        | SCN9A     | NM_002977    | 0.87                                             |
| SCZ CNV  | hHR030321 | RBM8A                                        | hHR030321        | RBM8A     | NM_005105    | 1.00                                             |
| SCZ CNV  | hHC022493 | SERPIND1                                     | hHC022493        | SERPIND1  | NM_000185    | 1.00                                             |
| SCZ CNV  | hHC014256 | TCTEX1D2                                     | hHC014256        | TCTEX1D2  | NM_152773    | 1.00                                             |
| SCZ CNV  | hHC017503 | TXNIP                                        | hHC017503        | TXNIP     | NM_006472    | 1.00                                             |
| SCZ CNV  | hHR014260 | UBXN7                                        | hHR014260        | UBXN7     | NM_015562    | 1.00                                             |
| SCZ CNV  | hHC014115 | ZNF74                                        | hHC014115        | ZNF74     | NM_003426    | 1.00                                             |
| SCZ SNV  | hHC002182 | ASAP2                                        | hHC002182        | ASAP2     | NM_003887    | 1.00                                             |
|          |           |                                              | hHC002121        | NAPEPLD   | NM_001122838 | 0.85                                             |
|          |           |                                              | hHC003758        | C9orf82   | NM_024828    | 0.82                                             |
|          |           |                                              | hHR001994        | SPTLC1    | NM_006415    | 0.81                                             |
| SCZ SNV  | hHC024980 | BCORL1                                       | hHC011844        | FAM123B   | NM_152424    | 0.81                                             |
|          |           |                                              | hHC019619        | ABCC10    | NM_033450    | 0.80                                             |
|          |           |                                              | hHC024980        | BCORL1    | NM_021946    | 1.00                                             |
| SCZ SNV  | hHC009547 | BIRC6                                        | hHC009547        | BIRC6     | NM_016252    | 1.00                                             |
| SCZ SNV  | hHC025318 | BRPF1                                        | hHC025318        | BRPF1     | NM_001003694 | 1.00                                             |
| SCZ SNV  | hHC014706 | C11orf30                                     | hHC014706        | C11orf30  | NM_020193    | 1.00                                             |
| SCZ SNV  | hHC010825 | CBX5                                         | hHA033084        | PRKRIR    | AV706361     | 0.81                                             |
|          |           |                                              | hHA037235        | MAP4      | NM_002375    | 0.82                                             |
|          |           |                                              | hHA037234        | MAP4      | NM_002375    | 0.83                                             |



Table S4 Coexpression

| Gene Set | Probe     | Pre-natally enriched Disease-associated Gene | Correlated Probe | Gene      | Accession    | Pearson's Correlation Coefficient (RIN Adjusted) |
|----------|-----------|----------------------------------------------|------------------|-----------|--------------|--------------------------------------------------|
|          |           |                                              | hHC003596        | BOD1L     | NM_148894    | 0.82                                             |
|          |           |                                              | hHA034951        | ZFP106    | NM_022473    | 0.82                                             |
|          |           |                                              | hHA036019        | LSAMP     | NM_002338    | 0.84                                             |
|          |           |                                              | hHA033054        | CDC27     | NM_001114091 | 0.86                                             |
|          |           |                                              | hHA034481        | KCNH7     | NM_033272    | 0.81                                             |
|          |           |                                              | hHC010960        | PLXNA2    | NM_025179    | 0.82                                             |
|          |           |                                              | hHC017776        | THAP6     | NM_144721    | 0.81                                             |
|          |           |                                              | hHR010912        | (ENC1),   | DA181535     | 0.82                                             |
|          |           |                                              | hHC008475        | KCNH7     | NM_033272    | 0.90                                             |
|          |           |                                              | hHR004083        | H2AFV     | NM_012412    | 0.86                                             |
|          |           |                                              | hHC003794        | BU071960  | BU071960     | 0.87                                             |
|          |           |                                              | hHR011989        | C6orf174  | NM_001012279 | 0.81                                             |
| SCZ SNV  | hHR016405 | CCDC84                                       | hHR016405        | CCDC84    | NM_198489    | 1.00                                             |
| SCZ SNV  | hHA035671 | CHEK2                                        | hHC003564        | ZNF367    | NM_153695    | 0.84                                             |
|          |           |                                              | hHC006552        | PPAP2B    | NM_003713    | 0.81                                             |
|          |           |                                              | hHC014412        | TGIF1     | NM_170695    | 0.80                                             |
|          |           |                                              | hHC029136        | PTTG1     | NM_004219    | 0.89                                             |
|          |           |                                              | hHA034980        | CDC2      | NM_001130829 | 0.82                                             |
|          |           |                                              | hHC029940        | ADH5      | NM_000671    | 0.83                                             |
|          |           |                                              | hHC004439        | STK17B    | NM_004226    | 0.81                                             |
|          |           |                                              | hHC028811        | UBE2C     | NM_181802    | 0.83                                             |
|          |           |                                              | hHA038027        | TYMS      | NM_001071    | 0.84                                             |
|          |           |                                              | hHC003887        | MAT2B     | NM_182796    | 0.82                                             |
|          |           |                                              | hHC020495        | PRC1      | NM_003981    | 0.82                                             |
|          |           |                                              | hHC023951        | AURKA     | NM_198433    | 0.90                                             |
|          |           |                                              | hHC007271        | CENPK     | NM_022145    | 0.89                                             |
|          |           |                                              | hHR012539        | CHEK2     | NM_001005735 | 0.82                                             |
|          |           |                                              | hHC014459        | CCNA2     | NM_001237    | 0.92                                             |
|          |           |                                              | hHA037019        | RAD51     | NM_002875    | 0.80                                             |
|          |           |                                              | hHC002195        | STON1     | NM_006873    | 0.83                                             |
|          |           |                                              | hHC002314        | FAM122C   | NM_138819    | 0.84                                             |
|          |           |                                              | hHC029674        | FAM64A    | NM_019013    | 0.80                                             |
|          |           |                                              | hHC005794        | KIAA0101  | NM_014736    | 0.84                                             |
|          |           |                                              | hHC009634        | C15orf23  | NM_001142761 | 0.82                                             |
|          |           |                                              | hHC015970        | CENPM     | NM_024053    | 0.84                                             |
|          |           |                                              | hHA039586        | TYMS      | NM_001071    | 0.80                                             |
|          |           |                                              | hHC003418        | C14orf106 | NM_018353    | 0.85                                             |
|          |           |                                              | hHC011686        | C21orf58  | NM_058180    | 0.85                                             |
|          |           |                                              | hHE041914        | AK123765  | AK123765     | 0.90                                             |
|          |           |                                              | hHC002590        | CENPF     | NM_016343    | 0.81                                             |
|          |           |                                              | hHC004018        | BRCA1     | NM_007295    | 0.86                                             |
|          |           |                                              | hHC007762        | CDCA5     | NM_080668    | 0.86                                             |
|          |           |                                              | hHC020830        | GMNN      | NM_015895    | 0.82                                             |
|          |           |                                              | hHC016905        | CDK2      | NM_001798    | 0.89                                             |

Table S4 Coexpression

| Gene Set | Probe | Pre-natally enriched Disease-associated Gene | Correlated Probe | Gene     | Accession    | Pearson's Correlation Coefficient (RIN Adjusted) |
|----------|-------|----------------------------------------------|------------------|----------|--------------|--------------------------------------------------|
|          |       |                                              | hHC021045        | CDCA8    | NM_018101    | 0.86                                             |
|          |       |                                              | hHC003297        | DACH1    | NM_080759    | 0.86                                             |
|          |       |                                              | hHR012993        | FZD2     | NM_001466    | 0.82                                             |
|          |       |                                              | hHC004389        | WEE1     | NM_003390    | 0.85                                             |
|          |       |                                              | hHC006489        | TYMS     | NM_001071    | 0.86                                             |
|          |       |                                              | hHC010341        | ACTL6A   | NM_178042    | 0.85                                             |
|          |       |                                              | hHR017349        | MAD2L1   | NM_002358    | 0.90                                             |
|          |       |                                              | hHR025605        | CDC25A   | NM_001789    | 0.84                                             |
|          |       |                                              | hHR028857        | RACGAP1  | NM_001126103 | 0.87                                             |
|          |       |                                              | hHC002420        | CDC14A   | NM_003672    | 0.87                                             |
|          |       |                                              | hHR003572        | RTKN2    | NM_145307    | 0.88                                             |
|          |       |                                              | hHC004040        | CDC45L   | NM_003504    | 0.85                                             |
|          |       |                                              | hHC010568        | NFATC3   | NM_004555    | 0.84                                             |
|          |       |                                              | hHA032936        | CAMTA1   | NM_015215    | 0.82                                             |
|          |       |                                              | hHC014252        | POLA2    | NM_002689    | 0.82                                             |
|          |       |                                              | hHA033836        | CDC14A   | NM_003672    | 0.83                                             |
|          |       |                                              | hHA034304        | CDKN3    | NM_005192    | 0.85                                             |
|          |       |                                              | hHR008024        | PRDM16   | NM_022114    | 0.84                                             |
|          |       |                                              | hHC016868        | CDCA7    | NM_031942    | 0.83                                             |
|          |       |                                              | hHR002672        | KIF11    | NM_004523    | 0.86                                             |
|          |       |                                              | hHC009680        | ZWINT    | NM_032997    | 0.84                                             |
|          |       |                                              | hHC024295        | MCM5     | NM_006739    | 0.85                                             |
|          |       |                                              | hHC031507        | UHRF1    | NM_013282    | 0.83                                             |
|          |       |                                              | hHC003499        | LIPG     | NM_006033    | 0.87                                             |
|          |       |                                              | hHC004255        | C5orf34  | NM_198566    | 0.86                                             |
|          |       |                                              | hHC009163        | C1orf112 | NM_018186    | 0.81                                             |
|          |       |                                              | hHC009931        | TCF19    | NM_007109    | 0.81                                             |
|          |       |                                              | hHC009559        | FAM111A  | NM_001142520 | 0.83                                             |
|          |       |                                              | hHA035671        | CHEK2    | NM_001005735 | 1.00                                             |
|          |       |                                              | hHC003451        | SFRP2    | NM_003013    | 0.83                                             |
|          |       |                                              | hHR026706        | SAP30    | NM_003864    | 0.82                                             |
|          |       |                                              | hHA034122        | PPIL5    | NM_152329    | 0.82                                             |
|          |       |                                              | hHC001986        | IL33     | NM_033439    | 0.81                                             |
|          |       |                                              | hHR004098        | SMC4     | NM_005496    | 0.89                                             |
|          |       |                                              | hHC008214        | TMEM194A | NM_001130963 | 0.87                                             |
|          |       |                                              | hHR023394        | FAM96A   | NM_032231    | 0.82                                             |
|          |       |                                              | hHA039906        | PCNA     | NM_182649    | 0.80                                             |
|          |       |                                              | hHC003354        | ATAD2    | NM_014109    | 0.82                                             |
|          |       |                                              | hHC018606        | C12orf48 | NM_017915    | 0.83                                             |
|          |       |                                              | hHR005105        | RAD51AP1 | NM_001130862 | 0.87                                             |
|          |       |                                              | hHC009617        | TUBB6    | NM_032525    | 0.85                                             |
|          |       |                                              | hHA035921        | RAD51    | NM_002875    | 0.81                                             |
|          |       |                                              | hHE042545        | CENPN    | NM_001100624 | 0.86                                             |
|          |       |                                              | hHC003593        | C6orf167 | NM_198468    | 0.84                                             |

Table S4 Coexpression

| Gene Set | Probe | Pre-natally enriched Disease-associated Gene | Correlated Probe | Gene     | Accession    | Pearson's Correlation Coefficient (RIN Adjusted) |
|----------|-------|----------------------------------------------|------------------|----------|--------------|--------------------------------------------------|
|          |       |                                              | hHC027497        | GIN54    | NM_032336    | 0.83                                             |
|          |       |                                              | hHC002849        | ECT2     | NM_018098    | 0.83                                             |
|          |       |                                              | hHC004469        | PHF21B   | NM_138415    | 0.81                                             |
|          |       |                                              | hHC006593        | SMC4     | NM_005496    | 0.87                                             |
|          |       |                                              | hHC008801        | SFRP1    | NM_003012    | 0.85                                             |
|          |       |                                              | hHC016577        | CCNB1    | NM_031966    | 0.88                                             |
|          |       |                                              | hHA033857        | NUSAP1   | NM_016359    | 0.87                                             |
|          |       |                                              | hHC006905        | CENPH    | NM_022909    | 0.82                                             |
|          |       |                                              | hHC014176        | CENPE    | NM_001813    | 0.80                                             |
|          |       |                                              | hHC021592        | TK1      | NM_003258    | 0.83                                             |
|          |       |                                              | hHC001935        | ORC6L    | NM_014321    | 0.84                                             |
|          |       |                                              | hHC008847        | NUF2     | NM_145697    | 0.87                                             |
|          |       |                                              | hHC009603        | FAM83D   | NM_030919    | 0.91                                             |
|          |       |                                              | hHC003795        | MELK     | NM_014791    | 0.82                                             |
|          |       |                                              | hHC011295        | NUSAP1   | NM_016359    | 0.87                                             |
|          |       |                                              | hHC028467        | 10-Sep   | NM_144710    | 0.82                                             |
|          |       |                                              | hHA038355        | CDCA3    | NM_031299    | 0.85                                             |
|          |       |                                              | hHC009591        | ZFX4     | NM_024721    | 0.83                                             |
|          |       |                                              | hHC012087        | RAD51    | NM_002875    | 0.84                                             |
|          |       |                                              | hHC026199        | CDKN3    | NM_005192    | 0.88                                             |
|          |       |                                              | hHC002402        | BUB1B    | NM_001211    | 0.90                                             |
|          |       |                                              | hHC006926        | NSBP1    | NM_030763    | 0.81                                             |
|          |       |                                              | hHC009506        | POLE2    | NM_002692    | 0.83                                             |
|          |       |                                              | hHC005690        | DEPDC1   | NM_001114120 | 0.85                                             |
|          |       |                                              | hHC020474        | CDCA3    | NM_031299    | 0.83                                             |
|          |       |                                              | hHC031718        | CDC20    | NM_001255    | 0.83                                             |
|          |       |                                              | hHR003986        | MCM10    | NM_182751    | 0.86                                             |
|          |       |                                              | hHC016862        | KIF18A   | NM_031217    | 0.84                                             |
|          |       |                                              | hHC019742        | PLCE1    | NM_016341    | 0.82                                             |
|          |       |                                              | hHC023870        | EXOSC8   | AK096810     | 0.82                                             |
|          |       |                                              | hHC025682        | MTA3     | NM_020744    | 0.85                                             |
|          |       |                                              | hHC026750        | BTG3     | NM_001130914 | 0.82                                             |
|          |       |                                              | hHC029426        | DBF4     | NM_006716    | 0.84                                             |
|          |       |                                              | hHC030398        | TMEM98   | NM_015544    | 0.81                                             |
|          |       |                                              | hHA038450        | RAD51    | NM_002875    | 0.85                                             |
|          |       |                                              | hHC010346        | PIF1     | NM_025049    | 0.90                                             |
|          |       |                                              | hHC007597        | HJURP    | NM_018410    | 0.84                                             |
|          |       |                                              | hHC020461        | TK1      | NM_003258    | 0.81                                             |
|          |       |                                              | hHR028333        | PTTG3    | NR_002734    | 0.86                                             |
|          |       |                                              | hHR031105        | CKS1B    | X54941       | 0.83                                             |
|          |       |                                              | hHC019417        | LOC91431 | NM_001099776 | 0.86                                             |
|          |       |                                              | hHC004849        | NCAPH    | NM_015341    | 0.90                                             |
|          |       |                                              | hHC005725        | BUB1     | NM_004336    | 0.83                                             |
|          |       |                                              | hHC027997        | PTTG3    | NR_002734    | 0.85                                             |

Table S4 Coexpression

| Gene Set | Probe     | Pre-natally enriched Disease-associated Gene | Correlated Probe | Gene     | Accession    | Pearson's Correlation Coefficient (RIN Adjusted) |
|----------|-----------|----------------------------------------------|------------------|----------|--------------|--------------------------------------------------|
|          |           |                                              | hHC002281        | NR2E1    | NM_003269    | 0.85                                             |
|          |           |                                              | hHC004117        | PPIL5    | NM_152329    | 0.88                                             |
| SCZ SNV  | hHA036352 | CLTCL1                                       | hHA036352        | CLTCL1   | NM_007098    | 1.00                                             |
| SCZ SNV  | hHR008145 | COL3A1                                       | hHR005136        | COL1A1   | NM_000088    | 0.80                                             |
| 0        |           |                                              | hHC007632        | CCL2     | NM_002982    | 0.83                                             |
|          |           |                                              | hHC015300        | MS4A4A   | NM_024021    | 0.82                                             |
|          |           |                                              | hHC002304        | MPZL2    | NM_005797    | 0.86                                             |
|          |           |                                              | hHR009600        | COL18A1  | NM_130444    | 0.90                                             |
|          |           |                                              | hHC015348        | ACTA2    | NM_001141945 | 0.84                                             |
|          |           |                                              | hHC002807        | LYVE1    | NM_006691    | 0.84                                             |
|          |           |                                              | hHC004751        | CD163    | NM_004244    | 0.83                                             |
|          |           |                                              | hHC009359        | F13A1    | NM_000129    | 0.84                                             |
|          |           |                                              | hHC003035        | DSP      | NM_004415    | 0.83                                             |
|          |           |                                              | hHC021119        | LAMC3    | NM_006059    | 0.84                                             |
|          |           |                                              | hHA035807        | CTSC     | NM_148170    | 0.87                                             |
|          |           |                                              | hHC002758        | TGFBR3   | NM_003243    | 0.89                                             |
|          |           |                                              | hHC004306        | EMCN     | NM_016242    | 0.86                                             |
|          |           |                                              | hHC003681        | ASPN     | NM_017680    | 0.85                                             |
|          |           |                                              | hHA034053        | CXCL12   | NM_199168    | 0.83                                             |
|          |           |                                              | hHC006513        | C7orf58  | NM_024913    | 0.90                                             |
|          |           |                                              | hHR008145        | COL3A1   | NM_000090    | 1.00                                             |
|          |           |                                              | hHC012669        | SCARA5   | NM_173833    | 0.85                                             |
|          |           |                                              | hHR012212        | COL5A1   | NM_000093    | 0.85                                             |
|          |           |                                              | hHC005636        | LUM      | NM_002345    | 0.84                                             |
|          |           |                                              | hHC007832        | FOXD1    | NM_004472    | 0.94                                             |
|          |           |                                              | hHC012248        | NID2     | NM_007361    | 0.90                                             |
|          |           |                                              | hHC001532        | CLDN11   | NM_005602    | 0.81                                             |
|          |           |                                              | hHC014131        | COLEC12  | NM_130386    | 0.93                                             |
|          |           |                                              | hHC002143        | NID1     | NM_002508    | 0.87                                             |
|          |           |                                              | hHC028998        | GJA1     | NM_000165    | 0.81                                             |
|          |           |                                              | hHR015546        | INS-IGF2 | NR_003512    | 0.87                                             |
|          |           |                                              | hHC015773        | DCN      | NM_001920    | 0.89                                             |
|          |           |                                              | hHC003664        | OGN      | NM_033014    | 0.82                                             |
|          |           |                                              | hHC022528        | PCOLCE   | NM_002593    | 0.82                                             |
|          |           |                                              | hHC015351        | RNASE1   | NM_198235    | 0.83                                             |
|          |           |                                              | hHC017835        | ISLR     | NM_005545    | 0.86                                             |
|          |           |                                              | hHR026571        | GJA1     | NM_000165    | 0.81                                             |
|          |           |                                              | hHC013442        | OLFML3   | NM_020190    | 0.94                                             |
|          |           |                                              | hHR008102        | TMEM132C | NM_001136103 | 0.82                                             |
|          |           |                                              | hHC003038        | EDNRA    | NM_001957    | 0.85                                             |
|          |           |                                              | hHC011606        | ID3      | NM_002167    | 0.85                                             |
|          |           |                                              | hHR003865        | FOXC1    | NM_001453    | 0.86                                             |
|          |           |                                              | hHC016645        | DCN      | NM_001920    | 0.91                                             |
|          |           |                                              | hHC031057        | CFH      | NM_000186    | 0.84                                             |

Table S4 Coexpression

| Gene Set | Probe     | Pre-natally enriched Disease-associated Gene | Correlated Probe | Gene      | Accession    | Pearson's Correlation Coefficient (RIN Adjusted) |
|----------|-----------|----------------------------------------------|------------------|-----------|--------------|--------------------------------------------------|
| SCZ SNV  | hHR003253 | CUGBP2                                       | hHR003253        | CUGBP2    | NM_001025077 | 1.00                                             |
| SCZ SNV  | hHC021326 | DNMT1                                        | hHC021326        | DNMT1     | NM_001130823 | 1.00                                             |
| SCZ SNV  | hHC015130 | EVC2                                         | hHC015130        | EVC2      | NM_147127    | 1.00                                             |
| SCZ SNV  | hHC010330 | FBXL10                                       | hHC010330        | FBXL10    | NM_032590    | 1.00                                             |
| SCZ SNV  | hHC015075 | FCGBP                                        | hHC015075        | FCGBP     | NM_003890    | 1.00                                             |
| SCZ SNV  | hHA034671 | FLAD1                                        | hHA034671        | FLAD1     | NM_025207    | 1.00                                             |
| SCZ SNV  | hHA033353 | H2AFV                                        | hHC003564        | ZNF367    | NM_153695    | 0.82                                             |
|          |           |                                              | hHC023628        | ANP32E    | NM_030920    | 0.85                                             |
|          |           |                                              | hHR026820        | MRPL51    | NM_016497    | 0.80                                             |
|          |           |                                              | hHC029136        | PTTG1     | NM_004219    | 0.90                                             |
|          |           |                                              | hHC009468        | MCM3      | NM_002388    | 0.81                                             |
|          |           |                                              | hHR001920        | SOX21     | NM_007084    | 0.81                                             |
|          |           |                                              | hHC028811        | UBE2C     | NM_181802    | 0.88                                             |
|          |           |                                              | hHA038027        | TYMS      | NM_001071    | 0.82                                             |
|          |           |                                              | hHC003875        | MCM9      | NM_153255    | 0.81                                             |
|          |           |                                              | hHC023951        | AURKA     | NM_198433    | 0.86                                             |
|          |           |                                              | hHR012539        | CHEK2     | NM_001005735 | 0.81                                             |
|          |           |                                              | hHC014459        | CCNA2     | NM_001237    | 0.83                                             |
|          |           |                                              | hHC029674        | FAM64A    | NM_019013    | 0.80                                             |
|          |           |                                              | hHC005794        | KIAA0101  | NM_014736    | 0.82                                             |
|          |           |                                              | hHC009634        | C15orf23  | NM_001142761 | 0.88                                             |
|          |           |                                              | hHC015970        | CENPM     | NM_024053    | 0.92                                             |
|          |           |                                              | hHR020686        | MXD3      | NM_031300    | 0.80                                             |
|          |           |                                              | hHR024910        | PCNA      | NM_002592    | 0.92                                             |
|          |           |                                              | hHA039586        | TYMS      | NM_001071    | 0.85                                             |
|          |           |                                              | hHC003418        | C14orf106 | NM_018353    | 0.84                                             |
|          |           |                                              | hHC006214        | NMU       | NM_006681    | 0.88                                             |
|          |           |                                              | hHC011686        | C21orf58  | NM_058180    | 0.82                                             |
|          |           |                                              | hHC011962        | UBE2T     | NM_014176    | 0.86                                             |
|          |           |                                              | hHC007762        | CDCA5     | NM_080668    | 0.84                                             |
|          |           |                                              | hHC020830        | GMNN      | NM_015895    | 0.87                                             |
|          |           |                                              | hHC016905        | CDK2      | NM_001798    | 0.82                                             |
|          |           |                                              | hHC003297        | DACH1     | NM_080759    | 0.85                                             |
|          |           |                                              | hHR012993        | FZD2      | NM_001466    | 0.83                                             |
|          |           |                                              | hHC022125        | PECI      | NM_206836    | 0.82                                             |
|          |           |                                              | hHR029325        | KPNA2     | BC067848     | 0.85                                             |
|          |           |                                              | hHC004389        | WEE1      | NM_003390    | 0.83                                             |
|          |           |                                              | hHC006489        | TYMS      | NM_001071    | 0.91                                             |
|          |           |                                              | hHC010341        | ACTL6A    | NM_178042    | 0.88                                             |
|          |           |                                              | hHR025605        | CDC25A    | NM_001789    | 0.82                                             |
|          |           |                                              | hHR028665        | CR625830  | CR625830     | 0.89                                             |
|          |           |                                              | hHR028857        | RACGAP1   | NM_001126103 | 0.90                                             |
|          |           |                                              | hHC015069        | HAT1      | NM_003642    | 0.81                                             |
|          |           |                                              | hHR029265        | (CDC20),  | BE836833     | 0.82                                             |

Table S4 Coexpression

| Gene Set | Probe | Pre-natally enriched Disease-associated Gene | Correlated Probe | Gene       | Accession    | Pearson's Correlation Coefficient (RIN Adjusted) |
|----------|-------|----------------------------------------------|------------------|------------|--------------|--------------------------------------------------|
|          |       |                                              | hHR029469        | THOC4      | NM_005782    | 0.84                                             |
|          |       |                                              | hHR019400        | RNASEH2C   | NM_032193    | 0.81                                             |
|          |       |                                              | hHA032936        | CAMTA1     | NM_015215    | 0.84                                             |
|          |       |                                              | hHC007628        | RFX2       | NM_000635    | 0.80                                             |
|          |       |                                              | hHC009920        | RFC4       | NM_181573    | 0.83                                             |
|          |       |                                              | hHA034304        | CDKN3      | NM_005192    | 0.82                                             |
|          |       |                                              | hHC016868        | CDC47      | NM_031942    | 0.84                                             |
|          |       |                                              | hHR026084        | NCRNA00095 | NR_024348    | 0.81                                             |
|          |       |                                              | hHR002672        | KIF11      | NM_004523    | 0.85                                             |
|          |       |                                              | hHC009680        | ZWINT      | NM_032997    | 0.92                                             |
|          |       |                                              | hHC016400        | GYPC       | NM_002101    | 0.81                                             |
|          |       |                                              | hHC018812        | MCM2       | NM_004526    | 0.87                                             |
|          |       |                                              | hHA039836        | CNIH4      | NM_014184    | 0.82                                             |
|          |       |                                              | hHE041072        | STK17B     | NM_004226    | 0.87                                             |
|          |       |                                              | hHC014803        | RNASEH2A   | NM_006397    | 0.84                                             |
|          |       |                                              | hHC024295        | MCM5       | NM_006739    | 0.80                                             |
|          |       |                                              | hHC004255        | C5orf34    | NM_198566    | 0.85                                             |
|          |       |                                              | hHC004459        | CLGN       | NM_001130675 | 0.87                                             |
|          |       |                                              | hHC009931        | TCF19      | NM_007109    | 0.82                                             |
|          |       |                                              | hHC022591        | OIP5       | NM_007280    | 0.81                                             |
|          |       |                                              | hHC031243        | SNRPG      | NM_003096    | 0.80                                             |
|          |       |                                              | hHC009559        | FAM111A    | NM_001142520 | 0.88                                             |
|          |       |                                              | hHC026275        | DCI        | NM_001919    | 0.81                                             |
|          |       |                                              | hHC030307        | SEPHS1     | NM_012247    | 0.83                                             |
|          |       |                                              | hHC030499        | EEF1D      | NM_032378    | 0.86                                             |
|          |       |                                              | hHC003451        | SFRP2      | NM_003013    | 0.84                                             |
|          |       |                                              | hHR016603        | CDK4       | NM_000075    | 0.85                                             |
|          |       |                                              | hHA037339        | ACAA2      | NM_006111    | 0.83                                             |
|          |       |                                              | hHC027006        | CLIC1      | NM_001288    | 0.82                                             |
|          |       |                                              | hHR004098        | SMC4       | NM_005496    | 0.86                                             |
|          |       |                                              | hHC005430        | C20orf72   | NM_052865    | 0.82                                             |
|          |       |                                              | hHC012822        | SNRPD3     | NM_004175    | 0.83                                             |
|          |       |                                              | hHC016578        | MBD2       | NM_003927    | 0.85                                             |
|          |       |                                              | hHR023394        | FAM96A     | NM_032231    | 0.81                                             |
|          |       |                                              | hHC030102        | SLC25A5    | NM_001152    | 0.82                                             |
|          |       |                                              | hHA039906        | PCNA       | NM_182649    | 0.82                                             |
|          |       |                                              | hHC003354        | ATAD2      | NM_014109    | 0.82                                             |
|          |       |                                              | hHC006906        | SNAPC3     | BC036031     | 0.81                                             |
|          |       |                                              | hHR018234        | CHAF1A     | NM_005483    | 0.84                                             |
|          |       |                                              | hHC031290        | FEN1       | NM_004111    | 0.82                                             |
|          |       |                                              | hHR005105        | RAD51AP1   | NM_001130862 | 0.85                                             |
|          |       |                                              | hHC009617        | TUBB6      | NM_032525    | 0.83                                             |
|          |       |                                              | hHC020837        | GINS2      | NM_016095    | 0.81                                             |
|          |       |                                              | hHA035921        | RAD51      | NM_002875    | 0.85                                             |

Table S4 Coexpression

| Gene Set | Probe | Pre-natally enriched Disease-associated Gene | Correlated Probe | Gene     | Accession    | Pearson's Correlation Coefficient (RIN Adjusted) |
|----------|-------|----------------------------------------------|------------------|----------|--------------|--------------------------------------------------|
|          |       |                                              | hHE042545        | CENPN    | NM_001100624 | 0.82                                             |
|          |       |                                              | hHC009833        | MCM7     | NM_182776    | 0.81                                             |
|          |       |                                              | hHC015197        | PHF19    | NM_015651    | 0.84                                             |
|          |       |                                              | hHC027497        | GIN54    | NM_032336    | 0.86                                             |
|          |       |                                              | hHC029309        | PCNA     | NM_002592    | 0.94                                             |
|          |       |                                              | hHA033053        | C14orf94 | NM_017815    | 0.83                                             |
|          |       |                                              | hHA033353        | H2AFV    | NM_138635    | 1.00                                             |
|          |       |                                              | hHC002849        | ECT2     | NM_018098    | 0.82                                             |
|          |       |                                              | hHC008801        | SFRP1    | NM_003012    | 0.83                                             |
|          |       |                                              | hHC016577        | CCNB1    | NM_031966    | 0.91                                             |
|          |       |                                              | hHC020993        | HADH     | NM_005327    | 0.86                                             |
|          |       |                                              | hHA033857        | NUSAP1   | NM_016359    | 0.86                                             |
|          |       |                                              | hHC006905        | CENPH    | NM_022909    | 0.88                                             |
|          |       |                                              | hHC009869        | CPSF3    | NM_016207    | 0.81                                             |
|          |       |                                              | hHC016505        | PTBP1    | NM_002819    | 0.82                                             |
|          |       |                                              | hHC004240        | ID4      | NM_001546    | 0.81                                             |
|          |       |                                              | hHC014704        | CENPN    | NM_001100624 | 0.84                                             |
|          |       |                                              | hHR017092        | NEK2     | NM_002497    | 0.81                                             |
|          |       |                                              | hHC006208        | SPAG5    | NM_006461    | 0.87                                             |
|          |       |                                              | hHC021592        | TK1      | NM_003258    | 0.84                                             |
|          |       |                                              | hHC003267        | COL9A1   | NM_001851    | 0.81                                             |
|          |       |                                              | hHC008847        | NUF2     | NM_145697    | 0.82                                             |
|          |       |                                              | hHC009603        | FAM83D   | NM_030919    | 0.85                                             |
|          |       |                                              | hHC007719        | CTNNAL1  | NM_003798    | 0.81                                             |
|          |       |                                              | hHR017511        | CKS2     | NM_001827    | 0.83                                             |
|          |       |                                              | hHC004851        | ITGB3BP  | NM_014288    | 0.81                                             |
|          |       |                                              | hHC011295        | NUSAP1   | NM_016359    | 0.89                                             |
|          |       |                                              | hHC023199        | IMPA2    | NM_014214    | 0.85                                             |
|          |       |                                              | hHC031347        | ALDH7A1  | NM_001182    | 0.81                                             |
|          |       |                                              | hHA038163        | CDKN2C   | NM_001262    | 0.84                                             |
|          |       |                                              | hHC009591        | ZFHX4    | NM_024721    | 0.81                                             |
|          |       |                                              | hHR015831        | EPR1     | NM_001012271 | 0.82                                             |
|          |       |                                              | hHC026199        | CDKN3    | NM_005192    | 0.86                                             |
|          |       |                                              | hHC002402        | BUB1B    | NM_001211    | 0.84                                             |
|          |       |                                              | hHC006926        | NSBP1    | NM_030763    | 0.84                                             |
|          |       |                                              | hHC011042        | DSN1     | NM_024918    | 0.88                                             |
|          |       |                                              | hHC014402        | SHMT2    | NM_005412    | 0.83                                             |
|          |       |                                              | hHC010490        | CNIH4    | NM_014184    | 0.80                                             |
|          |       |                                              | hHC018470        | PPIL5    | NM_152329    | 0.81                                             |
|          |       |                                              | hHC020474        | CDCA3    | NM_031299    | 0.87                                             |
|          |       |                                              | hHC029222        | CKS2     | NM_001827    | 0.85                                             |
|          |       |                                              | hHC031718        | CDC20    | NM_001255    | 0.85                                             |
|          |       |                                              | hHR003986        | MCM10    | NM_182751    | 0.82                                             |
|          |       |                                              | hHR004658        | NXT2     | NM_018698    | 0.83                                             |

Table S4 Coexpression

| Gene Set | Probe     | Pre-natally enriched Disease-associated Gene | Correlated Probe | Gene     | Accession    | Pearson's Correlation Coefficient (RIN Adjusted) |
|----------|-----------|----------------------------------------------|------------------|----------|--------------|--------------------------------------------------|
|          |           |                                              | hHC012446        | SNRPD3   | NM_004175    | 0.83                                             |
|          |           |                                              | hHC013214        | ATPAF2   | NM_145691    | 0.83                                             |
|          |           |                                              | hHC026750        | BTG3     | NM_001130914 | 0.87                                             |
|          |           |                                              | hHC030398        | TMEM98   | NM_015544    | 0.88                                             |
|          |           |                                              | hHA038450        | RAD51    | NM_002875    | 0.86                                             |
|          |           |                                              | hHC010346        | PIF1     | NM_025049    | 0.82                                             |
|          |           |                                              | hHC023882        | SPC24    | AK075287     | 0.85                                             |
|          |           |                                              | hHC007597        | HJURP    | NM_018410    | 0.81                                             |
|          |           |                                              | hHC020461        | TK1      | NM_003258    | 0.84                                             |
|          |           |                                              | hHR028333        | PTTG3    | NR_002734    | 0.86                                             |
|          |           |                                              | hHR031105        | CKS1B    | X54941       | 0.83                                             |
|          |           |                                              | hHC004849        | NCAPH    | NM_015341    | 0.84                                             |
|          |           |                                              | hHC007825        | C6orf130 | NM_145063    | 0.89                                             |
|          |           |                                              | hHC015229        | HMGB2    | NM_002129    | 0.86                                             |
|          |           |                                              | hHC019069        | MPST     | NR_024038    | 0.81                                             |
|          |           |                                              | hHC027997        | PTTG3    | NR_002734    | 0.82                                             |
|          |           |                                              | hHC030397        | SAP30    | NM_003864    | 0.86                                             |
|          |           |                                              | hHC002281        | NR2E1    | NM_003269    | 0.83                                             |
|          |           |                                              | hHC004117        | PPIL5    | NM_152329    | 0.89                                             |
|          |           |                                              | hHC006313        | CRB1     | NM_201253    | 0.84                                             |
|          |           |                                              | hHC013429        | RBM23    | NM_001077351 | 0.82                                             |
|          |           |                                              | hHR030613        | DHFR     | NM_000791    | 0.81                                             |
|          |           |                                              | hHA039049        | SHMT2    | NM_005412    | 0.80                                             |
|          |           |                                              | hHA040105        | CDK4     | NM_000075    | 0.83                                             |
| SCZ SNV  | hHC020587 | HIF1A                                        | hHA032988        | HIF1A    | NM_001530    | 0.86                                             |
|          |           |                                              | hHC006599        | ADAM10   | NM_001110    | 0.79                                             |
|          |           |                                              | hHC020587        | HIF1A    | NM_001530    | 1.00                                             |
|          |           |                                              | hHC031002        | DYNC112  | NM_001378    | 0.81                                             |
| SCZ SNV  | hHR016704 | HIST1H1E                                     | hHR016704        | HIST1H1E | NM_005321    | 1.00                                             |
| SCZ SNV  | hCT001342 | HMGCR                                        | hCT001234        | HMGCR    | NM_000859    | 0.93                                             |
|          |           |                                              | hCT001342        | HMGCR    | NM_000859    | 1.00                                             |
|          |           |                                              | hHR006622        | PWWP2A   | NM_052927    | 0.85                                             |
|          |           |                                              | hCT001245        | RB1      | M15400       | 0.84                                             |
|          |           |                                              | hCT001341        | HMGCR    | NM_000859    | 0.84                                             |
|          |           |                                              | hHA033002        | MATR3    | NM_199189    | 0.82                                             |
| SCZ SNV  | hHA034159 | IFT81                                        | hHA034159        | IFT81    | NM_014055    | 1.00                                             |
| SCZ SNV  | hHC002137 | IRS1                                         | hHE041500        | NFASC    | NM_015090    | 0.80                                             |
|          |           |                                              | hHC002137        | IRS1     | NM_005544    | 1.00                                             |
| SCZ SNV  | hHR006221 | KLF12                                        | hHC005215        | SACS     | NM_014363    | 0.89                                             |
|          |           |                                              | hHR006221        | KLF12    | NM_007249    | 1.00                                             |
| SCZ SNV  | hHE041382 | KPNA1                                        | hHE041382        | KPNA1    | NM_002264    | 1.00                                             |
| SCZ SNV  | hHC007864 | LAMA1                                        | hHR006282        | S1PR3    | NM_005226    | 0.83                                             |
|          |           |                                              | hHC007864        | LAMA1    | NM_005559    | 1.00                                             |
|          |           |                                              | hHC012913        | CHST14   | NM_130468    | 0.87                                             |



Table S4 Coexpression

| Gene Set | Probe     | Pre-natally enriched Disease-associated Gene | Correlated Probe | Gene      | Accession    | Pearson's Correlation Coefficient (RIN Adjusted) |
|----------|-----------|----------------------------------------------|------------------|-----------|--------------|--------------------------------------------------|
| SCZ SNV  | hCT000695 | LRP1                                         | hCT000695        | LRP1      | NM_002332    | 1.00                                             |
|          |           |                                              | hHR031067        | COL4A5    | NM_033380    | 0.87                                             |
|          |           |                                              | hHC016882        | COL27A1   | AB058773     | 0.82                                             |
|          |           |                                              | hCT000593        | VIM       | NM_003380    | 0.84                                             |
| SCZ SNV  | hHA035413 | MACF1                                        | hHA034754        | MACF1     | NM_012090    | 0.81                                             |
|          |           |                                              | hHA035413        | MACF1     | NM_012090    | 1.00                                             |
| SCZ SNV  | hHA035034 | MBTPS1                                       | hHR027288        | BAT2D1    | NM_015172    | 0.81                                             |
|          |           |                                              | hHA035034        | MBTPS1    | NM_003791    | 1.00                                             |
| SCZ SNV  | hHC004314 | MIOS                                         | hHC004314        | MIOS      | AL136892     | 1.00                                             |
| SCZ SNV  | hHC010551 | MKI67                                        | hHR003000        | CDK6      | NM_001259    | 0.83                                             |
|          |           |                                              | hHC003564        | ZNF367    | NM_153695    | 0.81                                             |
|          |           |                                              | hHC021144        | TPX2      | NM_012112    | 0.80                                             |
|          |           |                                              | hHC024216        | POLD1     | NM_002691    | 0.83                                             |
|          |           |                                              | hHC029136        | PTTG1     | NM_004219    | 0.82                                             |
|          |           |                                              | hHC003228        | WDR67     | NM_145647    | 0.84                                             |
|          |           |                                              | hHR001920        | SOX21     | NM_007084    | 0.82                                             |
|          |           |                                              | hHA038688        | NUSAP1    | NM_016359    | 0.86                                             |
|          |           |                                              | hHC015671        | WHSC1     | NM_133330    | 0.82                                             |
|          |           |                                              | hHC028811        | UBE2C     | NM_181802    | 0.88                                             |
|          |           |                                              | hHA038027        | TYMS      | NM_001071    | 0.83                                             |
|          |           |                                              | hHC007043        | ARL6IP6   | NM_152522    | 0.86                                             |
|          |           |                                              | hHC013295        | FOXM1     | NM_202002    | 0.91                                             |
|          |           |                                              | hHC023951        | AURKA     | NM_198433    | 0.85                                             |
|          |           |                                              | hHC014459        | CCNA2     | NM_001237    | 0.88                                             |
|          |           |                                              | hHC024347        | CDC25C    | NM_001790    | 0.83                                             |
|          |           |                                              | hHA037019        | RAD51     | NM_002875    | 0.83                                             |
|          |           |                                              | hHC002195        | STON1     | NM_006873    | 0.81                                             |
|          |           |                                              | hHC004534        | NCAPD3    | NM_015261    | 0.81                                             |
|          |           |                                              | hHC005590        | MSH6      | NM_000179    | 0.81                                             |
|          |           |                                              | hHC029674        | FAM64A    | NM_019013    | 0.85                                             |
|          |           |                                              | hHC005794        | KIAA0101  | NM_014736    | 0.88                                             |
|          |           |                                              | hHC015970        | CENPM     | NM_024053    | 0.83                                             |
|          |           |                                              | hHR020686        | MXD3      | NM_031300    | 0.83                                             |
|          |           |                                              | hHA039586        | TYMS      | NM_001071    | 0.82                                             |
|          |           |                                              | hHE041914        | AK123765  | AK123765     | 0.81                                             |
|          |           |                                              | hHC002590        | CENPF     | NM_016343    | 0.84                                             |
|          |           |                                              | hHC004018        | BRCA1     | NM_007295    | 0.83                                             |
|          |           |                                              | hHC004690        | GINS3     | NM_001126129 | 0.85                                             |
|          |           |                                              | hHC007762        | CDCA5     | NM_080668    | 0.85                                             |
|          |           |                                              | hHR018046        | LOC254559 | NR_015411    | 0.85                                             |
|          |           |                                              | hHC021045        | CDCA8     | NM_018101    | 0.85                                             |
|          |           |                                              | hHC025653        | MND1      | NM_032117    | 0.80                                             |
|          |           |                                              | hHC003297        | DACH1     | NM_080759    | 0.82                                             |
|          |           |                                              | hHR012993        | FZD2      | NM_001466    | 0.83                                             |

Table S4 Coexpression

| Gene Set | Probe | Pre-natally enriched Disease-associated Gene | Correlated Probe | Gene       | Accession    | Pearson's Correlation Coefficient (RIN Adjusted) |
|----------|-------|----------------------------------------------|------------------|------------|--------------|--------------------------------------------------|
|          |       |                                              | hHC024705        | KNTC1      | NM_014708    | 0.84                                             |
|          |       |                                              | hHC004389        | WEE1       | NM_003390    | 0.83                                             |
|          |       |                                              | hHR017349        | MAD2L1     | NM_002358    | 0.82                                             |
|          |       |                                              | hHR025605        | CDC25A     | NM_001789    | 0.82                                             |
|          |       |                                              | hHC007965        | C21orf45   | NM_018944    | 0.83                                             |
|          |       |                                              | hHC021789        | CENPF      | NM_016343    | 0.82                                             |
|          |       |                                              | hHC027729        | DLGAP5     | NM_014750    | 0.85                                             |
|          |       |                                              | hHR029265        | (CDC20),   | BE836833     | 0.88                                             |
|          |       |                                              | hHR003572        | RTKN2      | NM_145307    | 0.87                                             |
|          |       |                                              | hHC004040        | CDC45L     | NM_003504    | 0.85                                             |
|          |       |                                              | hHC008876        | C15orf42   | NM_152259    | 0.84                                             |
|          |       |                                              | hHC022400        | SMO        | NM_005631    | 0.84                                             |
|          |       |                                              | hHC016868        | CDCA7      | NM_031942    | 0.85                                             |
|          |       |                                              | hHR026084        | NCRNA00095 | NR_024348    | 0.82                                             |
|          |       |                                              | hHR002672        | KIF11      | NM_004523    | 0.86                                             |
|          |       |                                              | hHC006896        | MUTED      | NM_201280    | 0.81                                             |
|          |       |                                              | hHC009680        | ZWINT      | NM_032997    | 0.82                                             |
|          |       |                                              | hHC018812        | MCM2       | NM_004526    | 0.84                                             |
|          |       |                                              | hHC025244        | MXD3       | NM_031300    | 0.83                                             |
|          |       |                                              | hHC031507        | UHRF1      | NM_013282    | 0.84                                             |
|          |       |                                              | hHC003499        | LIPG       | NM_006033    | 0.81                                             |
|          |       |                                              | hHC007903        | KIF24      | NM_194313    | 0.82                                             |
|          |       |                                              | hHC009163        | C1orf112   | NM_018186    | 0.80                                             |
|          |       |                                              | hHC021451        | TROAP      | NM_005480    | 0.84                                             |
|          |       |                                              | hHC022591        | OIP5       | NM_007280    | 0.86                                             |
|          |       |                                              | hHR017719        | CCNB2      | NM_004701    | 0.83                                             |
|          |       |                                              | hHC027319        | TGIF2      | NM_021809    | 0.80                                             |
|          |       |                                              | hHC003451        | SFRP2      | NM_003013    | 0.81                                             |
|          |       |                                              | hHR013734        | DTL        | NM_016448    | 0.80                                             |
|          |       |                                              | hHC011850        | EME1       | NM_152463    | 0.81                                             |
|          |       |                                              | hHC001986        | IL33       | NM_033439    | 0.83                                             |
|          |       |                                              | hHR001818        | C11orf82   | NM_145018    | 0.86                                             |
|          |       |                                              | hHC011418        | TIMELESS   | NM_003920    | 0.87                                             |
|          |       |                                              | hHC018606        | C12orf48   | NM_017915    | 0.88                                             |
|          |       |                                              | hHA039066        | CDCA4      | NM_017955    | 0.87                                             |
|          |       |                                              | hHR005105        | RAD51AP1   | NM_001130862 | 0.86                                             |
|          |       |                                              | hHC006929        | MLF1IP     | NM_024629    | 0.80                                             |
|          |       |                                              | hHC006917        | TTK        | NM_003318    | 0.88                                             |
|          |       |                                              | hHC020837        | GINS2      | NM_016095    | 0.83                                             |
|          |       |                                              | hHA036485        | CDC25C     | NM_001790    | 0.80                                             |
|          |       |                                              | hHC003593        | C6orf167   | NM_198468    | 0.84                                             |
|          |       |                                              | hHC027497        | GINS4      | NM_032336    | 0.83                                             |
|          |       |                                              | hHC006593        | SMC4       | NM_005496    | 0.85                                             |
|          |       |                                              | hHA033857        | NUSAP1     | NM_016359    | 0.87                                             |

Table S4 Coexpression

| Gene Set | Probe | Pre-natally enriched Disease-associated Gene | Correlated Probe | Gene     | Accession    | Pearson's Correlation Coefficient (RIN Adjusted) |
|----------|-------|----------------------------------------------|------------------|----------|--------------|--------------------------------------------------|
|          |       |                                              | hHA035585        | FST      | NM_006350    | 0.80                                             |
|          |       |                                              | hHC007277        | STK33    | NM_030906    | 0.82                                             |
|          |       |                                              | hHC014681        | DTL      | NM_016448    | 0.82                                             |
|          |       |                                              | hHC014704        | CENPN    | NM_001100624 | 0.82                                             |
|          |       |                                              | hHR017092        | NEK2     | NM_002497    | 0.85                                             |
|          |       |                                              | hHC024976        | ASF1B    | NM_018154    | 0.82                                             |
|          |       |                                              | hHC014176        | CENPE    | NM_001813    | 0.86                                             |
|          |       |                                              | hHC003160        | KIF15    | NM_020242    | 0.85                                             |
|          |       |                                              | hHC003148        | CEP55    | NM_018131    | 0.89                                             |
|          |       |                                              | hHC008344        | POLA1    | NM_016937    | 0.80                                             |
|          |       |                                              | hHR016888        | CBX2     | NM_005189    | 0.83                                             |
|          |       |                                              | hHC021592        | TK1      | NM_003258    | 0.84                                             |
|          |       |                                              | hHC023416        | KIF2C    | NM_006845    | 0.81                                             |
|          |       |                                              | hHC008847        | NUF2     | NM_145697    | 0.91                                             |
|          |       |                                              | hHC009603        | FAM83D   | NM_030919    | 0.86                                             |
|          |       |                                              | hHC027267        | STIL     | NM_001048166 | 0.87                                             |
|          |       |                                              | hHR029571        | C9orf140 | NM_178448    | 0.82                                             |
|          |       |                                              | hHR017511        | CKS2     | NM_001827    | 0.89                                             |
|          |       |                                              | hHA035259        | OIP5     | NM_007280    | 0.84                                             |
|          |       |                                              | hHC004851        | ITGB3BP  | NM_014288    | 0.81                                             |
|          |       |                                              | hHC011295        | NUSAP1   | NM_016359    | 0.87                                             |
|          |       |                                              | hHR017427        | SMO      | NM_005631    | 0.81                                             |
|          |       |                                              | hHA038355        | CDCA3    | NM_031299    | 0.84                                             |
|          |       |                                              | hHC010551        | MKI67    | NM_002417    | 1.00                                             |
|          |       |                                              | hHC012087        | RAD51    | NM_002875    | 0.94                                             |
|          |       |                                              | hHR015831        | EPR1     | NM_001012271 | 0.92                                             |
|          |       |                                              | hHC026199        | CDKN3    | NM_005192    | 0.80                                             |
|          |       |                                              | hHC009506        | POLE2    | NM_002692    | 0.83                                             |
|          |       |                                              | hHC018470        | PPIL5    | NM_152329    | 0.83                                             |
|          |       |                                              | hHC020474        | CDCA3    | NM_031299    | 0.86                                             |
|          |       |                                              | hHC027578        | CCNB2    | NM_004701    | 0.88                                             |
|          |       |                                              | hHC031718        | CDC20    | NM_001255    | 0.83                                             |
|          |       |                                              | hHR003986        | MCM10    | NM_182751    | 0.88                                             |
|          |       |                                              | hHC016862        | KIF18A   | NM_031217    | 0.83                                             |
|          |       |                                              | hHC025682        | MTA3     | NM_020744    | 0.81                                             |
|          |       |                                              | hHR006230        | FOXP4    | NM_213596    | 0.88                                             |
|          |       |                                              | hHC010346        | PIF1     | NM_025049    | 0.81                                             |
|          |       |                                              | hHC023882        | SPC24    | AK075287     | 0.86                                             |
|          |       |                                              | hHC007597        | HJURP    | NM_018410    | 0.89                                             |
|          |       |                                              | hHR028333        | PTTG3    | NR_002734    | 0.87                                             |
|          |       |                                              | hHC016069        | E2F2     | NM_004091    | 0.87                                             |
|          |       |                                              | hHC004849        | NCAPH    | NM_015341    | 0.86                                             |
|          |       |                                              | hHC005725        | BUB1     | NM_004336    | 0.88                                             |
|          |       |                                              | hHR009085        | ZNF788   | AK128700     | 0.81                                             |

Table S4 Coexpression

| Gene Set | Probe     | Pre-natally enriched Disease-associated Gene | Correlated Probe | Gene          | Accession    | Pearson's Correlation Coefficient (RIN Adjusted) |
|----------|-----------|----------------------------------------------|------------------|---------------|--------------|--------------------------------------------------|
|          |           |                                              | hHC004117        | PPIL5         | NM_152329    | 0.81                                             |
|          |           |                                              | hHC016789        | SEMA5B        | NM_001031702 | 0.81                                             |
| SCZ SNV  | hHC016908 | N4BP2L2                                      | hHC016908        | N4BP2L2       | NM_014887    | 1.00                                             |
| SCZ SNV  | hHC008161 | NCAN                                         | hHC008161        | NCAN          | NM_004386    | 1.00                                             |
| SCZ SNV  | hHC028656 | NFE2L3                                       | hHR030156        | NFE2L3        | NM_004289    | 0.83                                             |
|          |           |                                              | hHC028656        | NFE2L3        | BC056142     | 1.00                                             |
| SCZ SNV  | hHC009957 | NUP214                                       | hHC009957        | NUP214        | BC105998     | 1.00                                             |
|          |           |                                              | hHC021306        | AGAP3         | NM_031946    | 0.81                                             |
| SCZ SNV  | hHC012766 | NUP54                                        | hHC012766        | NUP54         | NM_017426    | 1.00                                             |
| SCZ SNV  | hHC006993 | ODZ1                                         | hHC006993        | ODZ1          | NM_014253    | 1.00                                             |
| SCZ SNV  | hHC010986 | PAG1                                         | hHC010919        | LTBP1         | NM_206943    | 0.81                                             |
|          |           |                                              | hHC010986        | PAG1          | NM_018440    | 1.00                                             |
|          |           |                                              | hHC007804        | CCDC147       | NM_001008723 | 0.83                                             |
| SCZ SNV  | hHC014816 | PLK3                                         | hHC014816        | PLK3          | NM_004073    | 1.00                                             |
| SCZ SNV  | hHC031110 | PSG1                                         | hHC031110        | PSG1          | NM_006905    | 1.00                                             |
| SCZ SNV  | hHC024061 | RAD54L2                                      | hHC022553        | SNAPC4        | NM_003086    | 0.82                                             |
|          |           |                                              | hHC024061        | RAD54L2       | NM_015106    | 1.00                                             |
| SCZ SNV  | hHC006894 | RFX3                                         | hHA036647        | MAP2          | NM_002374    | 0.82                                             |
|          |           |                                              | hHC006894        | RFX3          | NM_134428    | 1.00                                             |
| SCZ SNV  | hHA034713 | RGS12                                        | hHA034713        | RGS12         | BC118594     | 1.00                                             |
| SCZ SNV  | hHR002221 | RRP1B                                        | hHR002221        | RRP1B         | NM_015056    | 1.00                                             |
| SCZ SNV  | hHC003807 | SEC24B                                       | hHC003807        | SEC24B        | NM_006323    | 1.00                                             |
| SCZ SNV  | hHC006606 | SLC19A2                                      | hHA033756        | ZNF644        | NM_201269    | 0.82                                             |
|          |           |                                              | hCT001199        | RB1           | NM_000321    | 0.80                                             |
|          |           |                                              | hCT001475        | RB1           | NM_000321    | 0.80                                             |
|          |           |                                              | hHC001918        | KIAA0528      | NM_014802    | 0.81                                             |
|          |           |                                              | hHA037592        | FAM178A       | NM_018121    | 0.81                                             |
|          |           |                                              | hHA038142        | C9orf72       | NM_018325    | 0.80                                             |
| SCZ SNV  | hHC001832 | SLC38A2                                      | hHC001832        | SLC38A2       | NM_018976    | 1.00                                             |
| SCZ SNV  | hHR002326 | SMCHD1                                       | hHR002326        | SMCHD1        | NM_015295    | 1.00                                             |
|          |           |                                              | hHC004846        | ZCCHC11       | NM_001009881 | 0.84                                             |
| SCZ SNV  | hHE041009 | SPATA5                                       | hHE041009        | SPATA5        | NM_145207    | 1.00                                             |
| SCZ SNV  | hHC012897 | ST3GAL6                                      | hHC011157        | LOC202451     | BC022980     | 0.81                                             |
|          |           |                                              | hHC012897        | ST3GAL6       | AK001922     | 1.00                                             |
|          |           |                                              | hHA034003        | SORBS1        | NM_001034954 | 0.81                                             |
|          |           |                                              | hHA035251        | EPHA3         | NM_005233    | 0.83                                             |
|          |           |                                              | hHR022370        | RRM2B         | NM_015713    | 0.84                                             |
| SCZ SNV  | hHA037017 | STAG1                                        | hCT001452        | RB1           | NM_000321    | 0.80                                             |
|          |           |                                              | hHA033036        | DHX9          | NM_001357    | 0.81                                             |
|          |           |                                              | hHC013212        | SPAG9         | NM_001130528 | 0.85                                             |
|          |           |                                              | hCT001175        | RB1           | NM_000321    | 0.80                                             |
|          |           |                                              | hHA034415        | NKHD1-EIF4EBP | NM_020690    | 0.86                                             |
|          |           |                                              | hHA038075        | KIAA1429      | NM_015496    | 0.80                                             |
|          |           |                                              | hHC009525        | PRKAA1        | NM_206907    | 0.81                                             |

Table S4 Coexpression

| Gene Set | Probe     | Pre-natally enriched Disease-associated Gene | Correlated Probe | Gene     | Accession    | Pearson's Correlation Coefficient (RIN Adjusted) |
|----------|-----------|----------------------------------------------|------------------|----------|--------------|--------------------------------------------------|
|          |           |                                              | hHA033237        | DHX9     | NM_001357    | 0.85                                             |
|          |           |                                              | hHA037017        | STAG1    | NM_005862    | 1.00                                             |
|          |           |                                              | hHA035143        | CNOT1    | NM_016284    | 0.82                                             |
|          |           |                                              | hCT001205        | OCRL     | NM_000276    | 0.80                                             |
| SCZ SNV  | hHC006885 | TBC1D14                                      | hHC006885        | TBC1D14  | NM_020773    | 1.00                                             |
| SCZ SNV  | hHC004021 | THBS1                                        | hHC004021        | THBS1    | NM_003246    | 1.00                                             |
| SCZ SNV  | hHC030724 | TLK2                                         | hHC030724        | TLK2     | NM_006852    | 1.00                                             |
| SCZ SNV  | hHR003862 | TRAK1                                        | hHR003862        | TRAK1    | NM_014965    | 1.00                                             |
| SCZ SNV  | hHC001627 | UBR5                                         | hHR001980        | USP38    | NM_032557    | 0.82                                             |
|          |           |                                              | hHC001627        | UBR5     | CD511402     | 1.00                                             |
| SCZ SNV  | hHC005092 | URB2                                         | hHC005092        | URB2     | NM_014777    | 1.00                                             |
| SCZ SNV  | hHR006568 | XPR1                                         | hHR006568        | XPR1     | NM_004736    | 1.00                                             |
|          |           |                                              | hHA034190        | DST      | NM_020388    | 0.82                                             |
| SCZ SNV  | hHC011709 | YLPM1                                        | hHC011709        | YLPM1    | NM_019589    | 1.00                                             |
| SCZ SNV  | hHE042021 | XPR1                                         | hHE042021        | XPR1     | NM_004736    | 1.00                                             |
| SCZ SNV  | hHC019150 | ZNF14                                        | hHC019150        | ZNF14    | NM_021030    | 1.00                                             |
| SCZ SNV  | hHC016846 | ZNF229                                       | hHC016846        | ZNF229   | NM_014518    | 1.00                                             |
|          |           |                                              | hHR025990        | ZNF780B  | NM_001005851 | 0.85                                             |
| SCZ SNV  | hHC015238 | ZNF530                                       | hHC015238        | ZNF530   | NM_020880    | 1.00                                             |
| ASD CNV  | hHC025769 | ARVCF                                        | hHC025769        | ARVCF    | NM_001670    | 1.00                                             |
| ASD CNV  | hHC008219 | ASPHD1                                       | hHC008219        | ASPHD1   | AF070642     | 1.00                                             |
|          |           |                                              | hHC011324        | MAPK4    | NM_002747    | 0.84                                             |
|          |           |                                              | hHC028147        | PTPN2    | NM_080422    | 0.85                                             |
|          |           |                                              | hHC004854        | ABHD7    | NM_173567    | 0.83                                             |
|          |           |                                              | hHA034525        | ASPHD1   | AF070642     | 0.85                                             |
| ASD CNV  | hHC014098 | BCL9                                         | hHC014098        | BCL9     | NM_004326    | 1.00                                             |
| ASD CNV  | hHC013809 | C16orf53                                     | hHC013809        | C16orf53 | NM_024516    | 1.00                                             |
|          |           |                                              | hHC013455        | RPGR     | NM_000328    | 0.83                                             |
|          |           |                                              | hHC006601        | EFS      | NM_005864    | 0.82                                             |
| ASD CNV  | hHC017116 | C20orf11                                     | hHC017116        | C20orf11 | NM_017896    | 1.00                                             |
| ASD CNV  | hHC030237 | CBWD1                                        | hHC030237        | CBWD1    | NM_018491    | 1.00                                             |
| ASD CNV  | hHC004040 | CDC45L                                       | hHC003564        | ZNF367   | NM_153695    | 0.85                                             |
|          |           |                                              | hHC014412        | TGIF1    | NM_170695    | 0.81                                             |
|          |           |                                              | hHC021144        | TPX2     | NM_012112    | 0.83                                             |
|          |           |                                              | hHC025176        | SLMO2    | NM_016045    | 0.81                                             |
|          |           |                                              | hHC029136        | PTTG1    | NM_004219    | 0.85                                             |
|          |           |                                              | hHA034980        | CDC2     | NM_001130829 | 0.88                                             |
|          |           |                                              | hHC031104        | CDC20    | NM_001255    | 0.81                                             |
|          |           |                                              | hHA038688        | NUSAP1   | NM_016359    | 0.88                                             |
|          |           |                                              | hHC014123        | CENPO    | NM_024322    | 0.83                                             |
|          |           |                                              | hHC026699        | RRM2     | NM_001034    | 0.81                                             |
|          |           |                                              | hHC028811        | UBE2C    | NM_181802    | 0.91                                             |
|          |           |                                              | hHA038027        | TYMS     | NM_001071    | 0.90                                             |
|          |           |                                              | hHC007043        | ARL6IP6  | NM_152522    | 0.84                                             |

Table S4 Coexpression

| Gene Set | Probe | Pre-natally enriched Disease-associated Gene | Correlated Probe | Gene     | Accession    | Pearson's Correlation Coefficient (RIN Adjusted) |
|----------|-------|----------------------------------------------|------------------|----------|--------------|--------------------------------------------------|
|          |       |                                              | hHC013295        | FOXM1    | NM_202002    | 0.89                                             |
|          |       |                                              | hHC020495        | PRC1     | NM_003981    | 0.87                                             |
|          |       |                                              | hHC023951        | AURKA    | NM_198433    | 0.90                                             |
|          |       |                                              | hHC004775        | FAM54A   | NM_001099286 | 0.83                                             |
|          |       |                                              | hHC007271        | CENPK    | NM_022145    | 0.84                                             |
|          |       |                                              | hHC014459        | CCNA2    | NM_001237    | 0.88                                             |
|          |       |                                              | hHC024347        | CDC25C   | NM_001790    | 0.87                                             |
|          |       |                                              | hHA037019        | RAD51    | NM_002875    | 0.87                                             |
|          |       |                                              | hHC002195        | STON1    | NM_006873    | 0.85                                             |
|          |       |                                              | hHR002122        | CEP152   | NM_014985    | 0.88                                             |
|          |       |                                              | hHC002314        | FAM122C  | NM_138819    | 0.83                                             |
|          |       |                                              | hHC004534        | NCAPD3   | NM_015261    | 0.85                                             |
|          |       |                                              | hHR014122        | CENPO    | NM_024322    | 0.82                                             |
|          |       |                                              | hHC029674        | FAM64A   | NM_019013    | 0.93                                             |
|          |       |                                              | hHC005794        | KIAA0101 | NM_014736    | 0.94                                             |
|          |       |                                              | hHC015970        | CENPM    | NM_024053    | 0.89                                             |
|          |       |                                              | hHR020686        | MXD3     | NM_031300    | 0.85                                             |
|          |       |                                              | hHA039586        | TYMS     | NM_001071    | 0.91                                             |
|          |       |                                              | hHC011686        | C21orf58 | NM_058180    | 0.81                                             |
|          |       |                                              | hHA038554        | RGS3     | NM_144488    | 0.80                                             |
|          |       |                                              | hHC002590        | CENPF    | NM_016343    | 0.86                                             |
|          |       |                                              | hHC004018        | BRCA1    | NM_007295    | 0.86                                             |
|          |       |                                              | hHC007762        | CDCA5    | NM_080668    | 0.86                                             |
|          |       |                                              | hHC016905        | CDK2     | NM_001798    | 0.84                                             |
|          |       |                                              | hHC021045        | CDCA8    | NM_018101    | 0.95                                             |
|          |       |                                              | hHC025653        | MND1     | NM_032117    | 0.87                                             |
|          |       |                                              | hHR012993        | FZD2     | NM_001466    | 0.85                                             |
|          |       |                                              | hHC024705        | KNTC1    | NM_014708    | 0.85                                             |
|          |       |                                              | hHR025293        | RPSAP58  | NR_003662    | 0.81                                             |
|          |       |                                              | hHC004389        | WEE1     | NM_003390    | 0.81                                             |
|          |       |                                              | hHC006489        | TYMS     | NM_001071    | 0.83                                             |
|          |       |                                              | hHR017349        | MAD2L1   | NM_002358    | 0.90                                             |
|          |       |                                              | hHR025605        | CDC25A   | NM_001789    | 0.86                                             |
|          |       |                                              | hHC007965        | C21orf45 | NM_018944    | 0.85                                             |
|          |       |                                              | hHC027729        | DLGAP5   | NM_014750    | 0.86                                             |
|          |       |                                              | hHR029265        | (CDC20), | BE836833     | 0.92                                             |
|          |       |                                              | hHC002420        | CDC14A   | NM_003672    | 0.84                                             |
|          |       |                                              | hHR003572        | RTKN2    | NM_145307    | 0.92                                             |
|          |       |                                              | hHC004040        | CDC45L   | NM_003504    | 1.00                                             |
|          |       |                                              | hHC008264        | H2AFX    | NM_002105    | 0.82                                             |
|          |       |                                              | hHC008876        | C15orf42 | NM_152259    | 0.89                                             |
|          |       |                                              | hHC014252        | POLA2    | NM_002689    | 0.84                                             |
|          |       |                                              | hHC022400        | SMO      | NM_005631    | 0.85                                             |
|          |       |                                              | hHA034304        | CDKN3    | NM_005192    | 0.86                                             |

Table S4 Coexpression

| Gene Set | Probe | Pre-natally enriched Disease-associated Gene | Correlated Probe | Gene       | Accession    | Pearson's Correlation Coefficient (RIN Adjusted) |
|----------|-------|----------------------------------------------|------------------|------------|--------------|--------------------------------------------------|
|          |       |                                              | hHC016868        | CDCA7      | NM_031942    | 0.87                                             |
|          |       |                                              | hHR026084        | NCRNA00095 | NR_024348    | 0.83                                             |
|          |       |                                              | hHC029252        | IGF2BP3    | NM_006547    | 0.82                                             |
|          |       |                                              | hHR002672        | KIF11      | NM_004523    | 0.90                                             |
|          |       |                                              | hHC009680        | ZWINT      | NM_032997    | 0.83                                             |
|          |       |                                              | hHC018812        | MCM2       | NM_004526    | 0.88                                             |
|          |       |                                              | hHC025244        | MXD3       | NM_031300    | 0.83                                             |
|          |       |                                              | hHC014803        | RNASEH2A   | NM_006397    | 0.84                                             |
|          |       |                                              | hHC014791        | CDC2       | NM_001130829 | 0.88                                             |
|          |       |                                              | hHC024295        | MCM5       | NM_006739    | 0.87                                             |
|          |       |                                              | hHC027187        | CTDSP2     | NM_005730    | 0.80                                             |
|          |       |                                              | hHC031507        | UHRF1      | NM_013282    | 0.86                                             |
|          |       |                                              | hHC003499        | LIPG       | NM_006033    | 0.82                                             |
|          |       |                                              | hHC004255        | C5orf34    | NM_198566    | 0.87                                             |
|          |       |                                              | hHC007903        | KIF24      | NM_194313    | 0.85                                             |
|          |       |                                              | hHC009163        | C1orf112   | NM_018186    | 0.92                                             |
|          |       |                                              | hHC009931        | TCF19      | NM_007109    | 0.84                                             |
|          |       |                                              | hHC021451        | TROAP      | NM_005480    | 0.86                                             |
|          |       |                                              | hHC022591        | OIP5       | NM_007280    | 0.92                                             |
|          |       |                                              | hHC009559        | FAM111A    | NM_001142520 | 0.84                                             |
|          |       |                                              | hHR017719        | CCNB2      | NM_004701    | 0.88                                             |
|          |       |                                              | hHC027319        | TGIF2      | NM_021809    | 0.84                                             |
|          |       |                                              | hHR030487        | FAM60A     | NM_001135811 | 0.85                                             |
|          |       |                                              | hHA035671        | CHEK2      | NM_001005735 | 0.85                                             |
|          |       |                                              | hHC003451        | SFRP2      | NM_003013    | 0.85                                             |
|          |       |                                              | hHA037339        | ACAA2      | NM_006111    | 0.81                                             |
|          |       |                                              | hHR013734        | DTL        | NM_016448    | 0.91                                             |
|          |       |                                              | hHR026706        | SAP30      | NM_003864    | 0.81                                             |
|          |       |                                              | hHC006558        | DLEU2      | CR625878     | 0.84                                             |
|          |       |                                              | hHC011850        | EME1       | NM_152463    | 0.90                                             |
|          |       |                                              | hHA034122        | PPIL5      | NM_152329    | 0.88                                             |
|          |       |                                              | hHC001986        | IL33       | NM_033439    | 0.86                                             |
|          |       |                                              | hHR004098        | SMC4       | NM_005496    | 0.88                                             |
|          |       |                                              | hHR001818        | C11orf82   | NM_145018    | 0.85                                             |
|          |       |                                              | hHC011418        | TIMELESS   | NM_003920    | 0.86                                             |
|          |       |                                              | hHC018606        | C12orf48   | NM_017915    | 0.87                                             |
|          |       |                                              | hHA039066        | CDCA4      | NM_017955    | 0.85                                             |
|          |       |                                              | hHR005105        | RAD51AP1   | NM_001130862 | 0.92                                             |
|          |       |                                              | hHC006929        | MLF1IP     | NM_024629    | 0.88                                             |
|          |       |                                              | hHC006917        | TTK        | NM_003318    | 0.91                                             |
|          |       |                                              | hHC020837        | GINS2      | NM_016095    | 0.87                                             |
|          |       |                                              | hHA033713        | ARHGAP11A  | NM_014783    | 0.87                                             |
|          |       |                                              | hHA035921        | RAD51      | NM_002875    | 0.90                                             |
|          |       |                                              | hHA036485        | CDC25C     | NM_001790    | 0.89                                             |

Table S4 Coexpression

| Gene Set | Probe | Pre-natally enriched Disease-associated Gene | Correlated Probe | Gene     | Accession    | Pearson's Correlation Coefficient (RIN Adjusted) |
|----------|-------|----------------------------------------------|------------------|----------|--------------|--------------------------------------------------|
|          |       |                                              | hHC003593        | C6orf167 | NM_198468    | 0.93                                             |
|          |       |                                              | hHC027497        | GIN54    | NM_032336    | 0.88                                             |
|          |       |                                              | hHA033053        | C14orf94 | NM_017815    | 0.80                                             |
|          |       |                                              | hHC006593        | SMC4     | NM_005496    | 0.92                                             |
|          |       |                                              | hHC016577        | CCNB1    | NM_031966    | 0.84                                             |
|          |       |                                              | hHA033857        | NUSAP1   | NM_016359    | 0.93                                             |
|          |       |                                              | hHA035585        | FST      | NM_006350    | 0.82                                             |
|          |       |                                              | hHA036737        | UBE2C    | NM_181799    | 0.80                                             |
|          |       |                                              | hHC007277        | STK33    | NM_030906    | 0.82                                             |
|          |       |                                              | hHC014681        | DTL      | NM_016448    | 0.81                                             |
|          |       |                                              | hHC014704        | CENPN    | NM_001100624 | 0.89                                             |
|          |       |                                              | hHR017092        | NEK2     | NM_002497    | 0.91                                             |
|          |       |                                              | hHC001792        | NUP37    | NM_024057    | 0.83                                             |
|          |       |                                              | hHC014176        | CENPE    | NM_001813    | 0.90                                             |
|          |       |                                              | hHC003160        | KIF15    | NM_020242    | 0.85                                             |
|          |       |                                              | hHC003148        | CEP55    | NM_018131    | 0.88                                             |
|          |       |                                              | hHC021592        | TK1      | NM_003258    | 0.90                                             |
|          |       |                                              | hHA035416        | ITGB3BP  | NM_014288    | 0.85                                             |
|          |       |                                              | hHC001935        | ORC6L    | NM_014321    | 0.81                                             |
|          |       |                                              | hHC008847        | NUF2     | NM_145697    | 0.97                                             |
|          |       |                                              | hHC009603        | FAM83D   | NM_030919    | 0.90                                             |
|          |       |                                              | hHC022563        | PIF1     | NM_025049    | 0.81                                             |
|          |       |                                              | hHC027267        | STIL     | NM_001048166 | 0.90                                             |
|          |       |                                              | hHR017511        | CKS2     | NM_001827    | 0.93                                             |
|          |       |                                              | hHC021243        | KRI1     | NM_023008    | 0.82                                             |
|          |       |                                              | hHA035259        | OIP5     | NM_007280    | 0.89                                             |
|          |       |                                              | hHC003603        | INTU     | NM_015693    | 0.82                                             |
|          |       |                                              | hHC003795        | MELK     | NM_014791    | 0.90                                             |
|          |       |                                              | hHC004851        | ITGB3BP  | NM_014288    | 0.87                                             |
|          |       |                                              | hHC011295        | NUSAP1   | NM_016359    | 0.91                                             |
|          |       |                                              | hHR017427        | SMO      | NM_005631    | 0.80                                             |
|          |       |                                              | hHA038355        | CDCA3    | NM_031299    | 0.86                                             |
|          |       |                                              | hHC010551        | MKI67    | NM_002417    | 0.85                                             |
|          |       |                                              | hHC012087        | RAD51    | NM_002875    | 0.87                                             |
|          |       |                                              | hHR015831        | EPR1     | NM_001012271 | 0.92                                             |
|          |       |                                              | hHC026199        | CDKN3    | NM_005192    | 0.80                                             |
|          |       |                                              | hHC002402        | BUB1B    | NM_001211    | 0.86                                             |
|          |       |                                              | hHC003746        | VRK1     | NM_003384    | 0.81                                             |
|          |       |                                              | hHC006926        | NSBP1    | NM_030763    | 0.84                                             |
|          |       |                                              | hHC009506        | POLE2    | NM_002692    | 0.85                                             |
|          |       |                                              | hHC005690        | DEPDC1   | NM_001114120 | 0.83                                             |
|          |       |                                              | hHC018470        | PPIL5    | NM_152329    | 0.81                                             |
|          |       |                                              | hHC020474        | CDCA3    | NM_031299    | 0.89                                             |
|          |       |                                              | hHC027578        | CCNB2    | NM_004701    | 0.92                                             |



Table S4 Coexpression

| Gene Set | Probe     | Pre-natally enriched Disease-associated Gene | Correlated Probe | Gene         | Accession    | Pearson's Correlation Coefficient (RIN Adjusted) |
|----------|-----------|----------------------------------------------|------------------|--------------|--------------|--------------------------------------------------|
|          |           |                                              | hHC029222        | CKS2         | NM_001827    | 0.81                                             |
|          |           |                                              | hHC031718        | CDC20        | NM_001255    | 0.92                                             |
|          |           |                                              | hHR003986        | MCM10        | NM_182751    | 0.95                                             |
|          |           |                                              | hHC016862        | KIF18A       | NM_031217    | 0.92                                             |
|          |           |                                              | hHC019742        | PLCE1        | NM_016341    | 0.82                                             |
|          |           |                                              | hHC025682        | MTA3         | NM_020744    | 0.80                                             |
|          |           |                                              | hHC026750        | BTG3         | NM_001130914 | 0.82                                             |
|          |           |                                              | hHC029426        | DBF4         | NM_006716    | 0.89                                             |
|          |           |                                              | hHR006230        | FOXN4        | NM_213596    | 0.92                                             |
|          |           |                                              | hHC010346        | PIF1         | NM_025049    | 0.85                                             |
|          |           |                                              | hHC023882        | SPC24        | AK075287     | 0.85                                             |
|          |           |                                              | hHC007597        | HJURP        | NM_018410    | 0.94                                             |
|          |           |                                              | hHC020461        | TK1          | NM_003258    | 0.82                                             |
|          |           |                                              | hHR028333        | PTTG3        | NR_002734    | 0.90                                             |
|          |           |                                              | hHC005509        | TRDMT1       | NM_004412    | 0.82                                             |
|          |           |                                              | hHC016069        | E2F2         | NM_004091    | 0.89                                             |
|          |           |                                              | hHC019417        | LOC91431     | NM_001099776 | 0.85                                             |
|          |           |                                              | hHC004849        | NCAPH        | NM_015341    | 0.95                                             |
|          |           |                                              | hHC005725        | BUB1         | NM_004336    | 0.94                                             |
|          |           |                                              | hHC012913        | CHST14       | NM_130468    | 0.85                                             |
|          |           |                                              | hHC016789        | SEMA5B       | NM_001031702 | 0.80                                             |
| ASD CNV  | hHA040201 | CHKB                                         | hHA040201        | CHKB         | NM_005198    | 1.00                                             |
| ASD CNV  | hHR025141 | CHRNA7                                       | hHR025141        | CHRNA7       | NM_000746    | 1.00                                             |
| ASD CNV  | hHA036352 | CLTCL1                                       | hHA036352        | CLTCL1       | NM_007098    | 1.00                                             |
| ASD CNV  | hHA034492 | CPT1B                                        | hHA034492        | CPT1B        | NM_152247    | 1.00                                             |
| ASD CNV  | hHR005214 | DGCR10                                       | hHR005214        | DGCR10       | NR_026651    | 1.00                                             |
| ASD CNV  | hHC030047 | DGCR5                                        | hHC029747        | PDXDC2       | NR_003610    | 0.81                                             |
|          |           |                                              | hHC030047        | DGCR5        | X91348       | 1.00                                             |
|          |           |                                              | hHC022670        | A2BP1        | NM_018723    | 0.83                                             |
| ASD CNV  | hHC018376 | DGCR8                                        | hHC018376        | DGCR8        | NM_022720    | 1.00                                             |
| ASD CNV  | hHC005414 | DIDO1                                        | hHC003670        | DBR1         | NM_016216    | 0.81                                             |
|          |           |                                              | hHR001870        | SHPRH        | NM_001042683 | 0.80                                             |
|          |           |                                              | hHC005008        | ARID4A       | NM_002892    | 0.81                                             |
|          |           |                                              | hHC005414        | DIDO1        | NM_033081    | 1.00                                             |
| ASD CNV  | hHC021273 | FAM57B                                       | hHC021273        | FAM57B       | NM_031478    | 1.00                                             |
|          |           |                                              | hHR026756        | TTLL12       | NM_015140    | 0.85                                             |
|          |           |                                              | hHC021087        | LRFN4        | NM_024036    | 0.84                                             |
| ASD CNV  | hHC004841 | FRMD4B                                       | hHC004841        | FRMD4B       | NM_015123    | 1.00                                             |
| ASD CNV  | hHC005789 | GTF2IRD1                                     | hHC005789        | GTF2IRD1     | NM_016328    | 1.00                                             |
| ASD CNV  | hHC025127 | HIRA                                         | hHC025127        | HIRA         | NM_016328    | 1.00                                             |
| ASD CNV  | hHC019168 | LZTR1                                        | hHC019168        | LZTR1        | NM_006767    | 1.00                                             |
|          |           |                                              | hHC020896        | RP3-402G11.5 | NM_031454    | 0.81                                             |
| ASD CNV  | hHA035034 | MBTPS1                                       | hHR027288        | BAT2D1       | NM_015172    | 0.81                                             |
|          |           |                                              | hHA035034        | MBTPS1       | NM_003791    | 1.00                                             |

Table S4 Coexpression

| Gene Set | Probe     | Pre-natally enriched Disease-associated Gene | Correlated Probe | Gene       | Accession    | Pearson's Correlation Coefficient (RIN Adjusted) |
|----------|-----------|----------------------------------------------|------------------|------------|--------------|--------------------------------------------------|
| ASD CNV  | hHC006923 | MKRN3                                        | hHC006923        | MKRN3      | NM_005664    | 1.00                                             |
| ASD CNV  | hHC010102 | MTMR15                                       | hHC010102        | MTMR15     | NM_014967    | 1.00                                             |
| ASD CNV  | hHC010565 | MYO9A                                        | hHC010565        | MYO9A      | NM_006901    | 1.00                                             |
| ASD CNV  | hHR030655 | NBPF10                                       | hHR030655        | NBPF10     | AF419616     | 1.00                                             |
| ASD CNV  | hHC014671 | NEO1                                         | hHC004738        | ACTN2      | NM_001103    | 0.83                                             |
|          |           |                                              | hHC011157        | LOC202451  | BC022980     | 0.85                                             |
|          |           |                                              | hHR009236        | FAM172A    | NM_032042    | 0.80                                             |
|          |           |                                              | hHC002156        | CSGALNACT1 | NM_001130518 | 0.80                                             |
|          |           |                                              | hHC007963        | PIK3R1     | NM_181523    | 0.80                                             |
|          |           |                                              | hHC014671        | NEO1       | NM_002499    | 1.00                                             |
|          |           |                                              | hHC003282        | FAM81A     | NM_152450    | 0.80                                             |
|          |           |                                              | hHR011106        | GPR176     | NM_007223    | 0.81                                             |
|          |           |                                              | hHC017058        | LGALS8     | NM_006499    | 0.82                                             |
|          |           |                                              | hHC002930        | SERPINE2   | NM_001136529 | 0.84                                             |
| ASD CNV  | hHA035283 | NRXN1                                        | hHC009943        | CACNA2D1   | NM_000722    | 0.81                                             |
|          |           |                                              | hHC014427        | SLC35F5    | NM_025181    | 0.82                                             |
|          |           |                                              | hHA035283        | NRXN1      | NM_001135659 | 1.00                                             |
|          |           |                                              | hHA034405        | USP34      | NM_014709    | 0.85                                             |
|          |           |                                              | hHC019261        | ANKRD28    | NM_015199    | 0.80                                             |
|          |           |                                              | hHC029833        | GNAQ       | NM_002072    | 0.80                                             |
| ASD CNV  | hHR005044 | PAR5                                         | hHC010704        | ZMYM5      | NM_001142684 | 0.80                                             |
|          |           |                                              | hHR011700        | PEX26      | AK000702     | 0.81                                             |
|          |           |                                              | hHC011135        | TTBK2      | NM_173500    | 0.80                                             |
|          |           |                                              | hHE040918        | TNRC6B     | NM_015088    | 0.82                                             |
|          |           |                                              | hHA036789        | DST        | NM_183380    | 0.80                                             |
|          |           |                                              | hHC017133        | ANKRD50    | NM_020337    | 0.84                                             |
|          |           |                                              | hHA032997        | GRIA1      | NM_000827    | 0.80                                             |
|          |           |                                              | hHE041033        | BF347758   | BF347758     | 0.80                                             |
|          |           |                                              | hHR004048        | C14orf153  | BC007412     | 0.84                                             |
|          |           |                                              | hHR005044        | PAR5       | NR_022008    | 1.00                                             |
|          |           |                                              | hHR006112        | ZKSCAN1    | NM_003439    | 0.85                                             |
|          |           |                                              | hHC030027        | ANKRD36B   | NM_025190    | 0.82                                             |
|          |           |                                              | hHR027157        | ANKRD36B   | NM_025190    | 0.83                                             |
|          |           |                                              | hHA035701        | MACF1      | NM_012090    | 0.83                                             |
| ASD CNV  | hHA036630 | PARP6                                        | hHC019891        | ZNF346     | NM_012279    | 0.80                                             |
|          |           |                                              | hHA036630        | PARP6      | NM_020214    | 1.00                                             |
| ASD CNV  | hHO047740 | PAR-SN                                       | hHR017972        | PAR-SN     | NR_022011    | 0.86                                             |
|          |           |                                              | hHO047740        | PAR-SN     | NR_022011    | 1.00                                             |
| ASD CNV  | hHA039366 | PI4KA                                        | hHA039366        | PI4KA      | NM_058004    | 1.00                                             |
| ASD CNV  | hHC019979 | PPP4C                                        | hHC018696        | KDELR1     | NM_006801    | 0.80                                             |
|          |           |                                              | hHA034332        | MBNL1      | NM_021038    | 0.80                                             |
|          |           |                                              | hHC019979        | PPP4C      | NM_002720    | 1.00                                             |
|          |           |                                              | hHC014351        | TMED7      | NM_181836    | 0.81                                             |
|          |           |                                              | hHA033755        | HERPUD2    | NM_022373    | 0.80                                             |

Table S4 Coexpression

| Gene Set | Probe     | Pre-natally enriched Disease-associated Gene | Correlated Probe | Gene     | Accession    | Pearson's Correlation Coefficient (RIN Adjusted) |
|----------|-----------|----------------------------------------------|------------------|----------|--------------|--------------------------------------------------|
|          |           |                                              | hHA036513        | FYN      | NM_002037    | 0.84                                             |
|          |           |                                              | hHC030932        | NONO     | NM_007363    | 0.85                                             |
|          |           |                                              | hCT000607        | ACTB     | NM_001101    | 0.85                                             |
|          |           |                                              | hHA033126        | CASC4    | NM_138423    | 0.83                                             |
|          |           |                                              | hHA034506        | MACF1    | NM_012090    | 0.83                                             |
|          |           |                                              | hHC013157        | SEL1L    | NM_005065    | 0.83                                             |
|          |           |                                              | hHR023273        | TOMM20   | NM_014765    | 0.82                                             |
|          |           |                                              | hHC017813        | GDI1     | NM_001493    | 0.83                                             |
| ASD CNV  | hHC007231 | PRKAB2                                       | hHC004824        | TAPT1    | NM_153365    | 0.81                                             |
|          |           |                                              | hHC005100        | CDH10    | NM_006727    | 0.88                                             |
|          |           |                                              | hHC001872        | CNRIP1   | NM_015463    | 0.80                                             |
|          |           |                                              | hHC006408        | LPL      | NM_000237    | 0.82                                             |
|          |           |                                              | hHC028284        | ACSL4    | NM_022977    | 0.80                                             |
|          |           |                                              | hHR006048        | PCDHA1   | NM_018900    | 0.83                                             |
|          |           |                                              | hHE040931        | CB242912 | CB242912     | 0.80                                             |
|          |           |                                              | hHR020135        | CHD5     | NM_015557    | 0.87                                             |
|          |           |                                              | hHR006047        | PCDHA1   | NM_018900    | 0.84                                             |
|          |           |                                              | hHR007103        | FAM169A  | NM_015566    | 0.85                                             |
|          |           |                                              | hHC012083        | KIAA1377 | NM_020802    | 0.85                                             |
|          |           |                                              | hHC008950        | CCBE1    | NM_133459    | 0.84                                             |
|          |           |                                              | hHR009994        | KALRN    | NM_003947    | 0.83                                             |
|          |           |                                              | hHA034678        | MYLIP    | NM_013262    | 0.86                                             |
|          |           |                                              | hHC008506        | PTPRT    | NM_133170    | 0.88                                             |
|          |           |                                              | hHR030586        | PCDH11X  | NM_032968    | 0.83                                             |
|          |           |                                              | hHR006046        | PCDHA1   | NM_018900    | 0.84                                             |
|          |           |                                              | hHC009694        | FBXO27   | NM_178820    | 0.86                                             |
|          |           |                                              | hHC017266        | CUX2     | NM_015267    | 0.84                                             |
|          |           |                                              | hHC006933        | BAALC    | NM_024812    | 0.81                                             |
|          |           |                                              | hHR009129        | ZNF706   | NM_001042510 | 0.82                                             |
|          |           |                                              | hHC003777        | NAV3     | NM_014903    | 0.86                                             |
|          |           |                                              | hHC009741        | FGF9     | NM_002010    | 0.82                                             |
|          |           |                                              | hHC005253        | KCND2    | NM_012281    | 0.86                                             |
|          |           |                                              | hHR004605        | THRB     | NM_001128177 | 0.88                                             |
|          |           |                                              | hHC004689        | NECAB1   | NM_022351    | 0.86                                             |
|          |           |                                              | hHR006045        | PCDHA1   | NM_018900    | 0.85                                             |
|          |           |                                              | hHC007220        | ELOVL2   | NM_017770    | 0.79                                             |
|          |           |                                              | hHC025160        | C17orf58 | NM_181656    | 0.82                                             |
|          |           |                                              | hHA035912        | GRM7     | BC136458     | 0.85                                             |
|          |           |                                              | hHC008960        | NKAIN2   | NM_001040214 | 0.83                                             |
|          |           |                                              | hHC010412        | DB519783 | DB519783     | 0.87                                             |
|          |           |                                              | hHR006055        | PCDHA1   | NM_018900    | 0.84                                             |
|          |           |                                              | hHC017683        | SUOX     | NM_000456    | 0.84                                             |
|          |           |                                              | hHC005695        | AJAP1    | NM_018836    | 0.81                                             |
|          |           |                                              | hHC007231        | PRKAB2   | NM_005399    | 1.00                                             |

Table S4 Coexpression

| Gene Set | Probe | Pre-natally enriched Disease-associated Gene | Correlated Probe | Gene      | Accession    | Pearson's Correlation Coefficient (RIN Adjusted) |
|----------|-------|----------------------------------------------|------------------|-----------|--------------|--------------------------------------------------|
|          |       |                                              | hHE040843        | CD678534  | CD678534     | 0.84                                             |
|          |       |                                              | hHC006295        | JAZF1     | NM_175061    | 0.82                                             |
|          |       |                                              | hHC008995        | RIMS1     | BC036608     | 0.85                                             |
|          |       |                                              | hHC027511        | FABP3     | NM_004102    | 0.81                                             |
|          |       |                                              | hHC002299        | AKAP7     | NM_016377    | 0.80                                             |
|          |       |                                              | hHR006043        | PCDHA1    | NM_018900    | 0.85                                             |
|          |       |                                              | hHC002214        | DPYD      | NM_000110    | 0.82                                             |
|          |       |                                              | hHC004902        | FAM19A2   | NM_178539    | 0.84                                             |
|          |       |                                              | hHR006054        | PCDHA1    | NM_018900    | 0.81                                             |
|          |       |                                              | hHR006738        | LOC283070 | BC073155     | 0.85                                             |
|          |       |                                              | hHC005898        | AFF2      | NM_002025    | 0.81                                             |
|          |       |                                              | hHC013950        | CHD5      | NM_015557    | 0.81                                             |
|          |       |                                              | hHA033834        | HDAC9     | NM_014707    | 0.80                                             |
|          |       |                                              | hHR005850        | BEAN      | NM_001136106 | 0.83                                             |
|          |       |                                              | hHR006042        | PCDHA1    | NM_018900    | 0.82                                             |
|          |       |                                              | hHR008046        | DERL1     | AY358818     | 0.82                                             |
|          |       |                                              | hHC010734        | MMP24     | NM_006690    | 0.81                                             |
|          |       |                                              | hHR006053        | PCDHA1    | NM_018900    | 0.85                                             |
|          |       |                                              | hHA033893        | KLHL4     | NM_019117    | 0.88                                             |
|          |       |                                              | hHC001865        | RBM24     | NM_153020    | 0.82                                             |
|          |       |                                              | hHC002429        | DNAJC6    | NM_014787    | 0.84                                             |
|          |       |                                              | hHC004361        | LRRC4C    | NM_020929    | 0.90                                             |
|          |       |                                              | hHR028841        | USP6      | NM_004505    | 0.80                                             |
|          |       |                                              | hHR005537        | LPHN3     | NM_015236    | 0.82                                             |
|          |       |                                              | hHR008897        | PLCH2     | NM_014638    | 0.91                                             |
|          |       |                                              | hHE040949        | EY892390  | EY892390     | 0.87                                             |
|          |       |                                              | hHA033869        | NEBL      | NM_006393    | 0.86                                             |
|          |       |                                              | hHC008260        | GRM7      | NM_181874    | 0.86                                             |
|          |       |                                              | hHC007240        | KLHL4     | NM_019117    | 0.83                                             |
|          |       |                                              | hHC004792        | PTCHD1    | NM_173495    | 0.88                                             |
|          |       |                                              | hHR006051        | PCDHA1    | NM_018900    | 0.84                                             |
|          |       |                                              | hHC009615        | L3MBTL3   | NM_032438    | 0.81                                             |
|          |       |                                              | hHR002763        | CACNA1C   | NM_199460    | 0.81                                             |
|          |       |                                              | hHC001634        | BACE1     | NM_012104    | 0.80                                             |
|          |       |                                              | hHR006050        | PCDHA1    | NM_018900    | 0.84                                             |
|          |       |                                              | hHR011906        | RIMBP2    | NM_015347    | 0.83                                             |
|          |       |                                              | hHR002630        | KIAA1107  | NM_015237    | 0.80                                             |
|          |       |                                              | hHC003290        | LOC153364 | NM_203406    | 0.81                                             |
|          |       |                                              | hHC009926        | SH3GL3    | NM_003027    | 0.80                                             |
|          |       |                                              | hHC003698        | FRMD4A    | NM_018027    | 0.83                                             |
|          |       |                                              | hHR001898        | KIAA1239  | NM_001144990 | 0.84                                             |
|          |       |                                              | hHC003050        | ALCAM     | NM_001627    | 0.87                                             |
|          |       |                                              | hHC008234        | LHX6      | NM_014368    | 0.81                                             |
|          |       |                                              | hHC018506        | WWC1      | NM_015238    | 0.81                                             |

Table S4 Coexpression

| Gene Set | Probe     | Pre-natally enriched Disease-associated Gene | Correlated Probe | Gene     | Accession    | Pearson's Correlation Coefficient (RIN Adjusted) |
|----------|-----------|----------------------------------------------|------------------|----------|--------------|--------------------------------------------------|
|          |           |                                              | hHC002797        | CDH11    | NM_001797    | 0.82                                             |
|          |           |                                              | hHR006049        | PCDHA1   | NM_018900    | 0.83                                             |
|          |           |                                              | hHE040993        | SAMD5    | NM_001030060 | 0.90                                             |
|          |           |                                              | hHC004537        | LRRC8B   | NM_015350    | 0.84                                             |
|          |           |                                              | hHC005689        | SLC30A10 | NM_018713    | 0.82                                             |
|          |           |                                              | hHC006757        | MYLIP    | NM_013262    | 0.82                                             |
|          |           |                                              | hHA035269        | KLHL4    | NM_019117    | 0.82                                             |
|          |           |                                              | hHE040789        | SCN9A    | NM_002977    | 0.87                                             |
| ASD CNV  | hHC021061 | RFC2                                         | hHC014803        | RNASEH2A | NM_006397    | 0.84                                             |
|          |           |                                              | hHA037339        | ACAA2    | NM_006111    | 0.83                                             |
|          |           |                                              | hHR026706        | SAP30    | NM_003864    | 0.84                                             |
|          |           |                                              | hHA038450        | RAD51    | NM_002875    | 0.82                                             |
|          |           |                                              | hHC021061        | RFC2     | NM_181471    | 1.00                                             |
|          |           |                                              | hHA039049        | SHMT2    | NM_005412    | 0.82                                             |
|          |           |                                              | hHA040105        | CDK4     | NM_000075    | 0.82                                             |
| ASD CNV  | hHC022493 | SERPIND1                                     | hHC022493        | SERPIND1 | NM_000185    | 1.00                                             |
| ASD CNV  | hHR005194 | SETD1B                                       | hHR005194        | SETD1B   | NM_015048    | 1.00                                             |
| ASD CNV  | hHR018776 | SHANK3                                       | hHR018776        | SHANK3   | NM_001080420 | 1.00                                             |
| ASD CNV  | hHA037337 | UBA3                                         | hHA034151        | TM7SF3   | NM_016551    | 0.85                                             |
|          |           |                                              | hHA033395        | CCT6A    | NM_001762    | 0.83                                             |
|          |           |                                              | hHA033154        | SAE1     | NM_005500    | 0.82                                             |
|          |           |                                              | hHR026984        | DNAJA1   | L08069       | 0.81                                             |
|          |           |                                              | hHA039547        | ATP6AP2  | NM_005765    | 0.80                                             |
|          |           |                                              | hHA037337        | UBA3     | NM_003968    | 1.00                                             |
|          |           |                                              | hHA033231        | TCP1     | NM_030752    | 0.84                                             |
|          |           |                                              | hHR026558        | BZW1     | NM_014670    | 0.80                                             |
|          |           |                                              | hHA032990        | ATP6AP2  | NM_005765    | 0.80                                             |
|          |           |                                              | hHA036074        | TTC33    | NM_012382    | 0.82                                             |
| ASD CNV  | hHA033034 | UBE3A                                        | hHA037464        | CREB1    | NM_134442    | 0.85                                             |
|          |           |                                              | hCT001104        | OCRL     | NM_000276    | 0.83                                             |
|          |           |                                              | hCT001188        | HMGCR    | NM_000859    | 0.86                                             |
|          |           |                                              | hHA033936        | CSE1L    | NM_001316    | 0.82                                             |
|          |           |                                              | hHA034020        | UBE2J1   | NM_016021    | 0.83                                             |
|          |           |                                              | hHA035472        | UBQLN1   | NM_013438    | 0.82                                             |
|          |           |                                              | hHA039504        | UBE3A    | NM_130839    | 0.83                                             |
|          |           |                                              | hHC013212        | SPAG9    | NM_001130528 | 0.82                                             |
|          |           |                                              | hHA034344        | CSE1L    | NM_001316    | 0.84                                             |
|          |           |                                              | hHA034332        | MBNL1    | NM_021038    | 0.81                                             |
|          |           |                                              | hHC017280        | UBXN7    | NM_015562    | 0.84                                             |
|          |           |                                              | hHA035988        | CNR1     | NM_016083    | 0.85                                             |
|          |           |                                              | hCT001175        | RB1      | NM_000321    | 0.85                                             |
|          |           |                                              | hCT001163        | HMGCR    | NM_000859    | 0.92                                             |
|          |           |                                              | hCT001451        | RB1      | NM_000321    | 0.85                                             |
|          |           |                                              | hHC005015        | SP4      | NM_003112    | 0.84                                             |

Table S4 Coexpression

| Gene Set | Probe | Pre-natally enriched Disease-associated Gene | Correlated Probe | Gene           | Accession       | Pearson's Correlation Coefficient (RIN Adjusted) |
|----------|-------|----------------------------------------------|------------------|----------------|-----------------|--------------------------------------------------|
|          |       |                                              | hHR007991        | PPP1R9A        | NM_017650       | 0.82                                             |
|          |       |                                              | hHC009995        | CCNH           | AK094534        | 0.88                                             |
|          |       |                                              | hHC024011        | LRRC49         | NM_017691       | 0.81                                             |
|          |       |                                              | hHC026327        | GMFB           | NM_004124       | 0.85                                             |
|          |       |                                              | hHA035927        | USP15          | AF153604        | 0.85                                             |
|          |       |                                              | hHA036779        | KIF1B          | NM_015074       | 0.81                                             |
|          |       |                                              | hCT001187        | HMGCR          | NM_000859       | 0.90                                             |
|          |       |                                              | hCT001295        | HMGCR          | NM_000859       | 0.82                                             |
|          |       |                                              | hCT001475        | RB1            | NM_000321       | 0.80                                             |
|          |       |                                              | hHR003683        | FBNP1L         | AK000282        | 0.84                                             |
|          |       |                                              | hHR008195        | LOC221710      | NM_001135575    | 0.88                                             |
|          |       |                                              | hHC014351        | TMED7          | NM_181836       | 0.83                                             |
|          |       |                                              | hHA035279        | PPP1CB         | NM_002709       | 0.83                                             |
|          |       |                                              | hHA036431        | RNF138         | NM_016271       | 0.84                                             |
|          |       |                                              | hCT001211        | HMGCR          | NM_000859       | 0.91                                             |
|          |       |                                              | hCT001499        | RB1            | NM_000321       | 0.81                                             |
|          |       |                                              | hHA033083        | GTF2H1         | NM_001142307    | 0.87                                             |
|          |       |                                              | hHA037511        | NEDD9          | NM_001142393    | 0.82                                             |
|          |       |                                              | hHA034739        | INPP5F         | NM_014937       | 0.84                                             |
|          |       |                                              | hHA037811        | DPYSL2         | NM_001386       | 0.83                                             |
|          |       |                                              | hCT001174        | RB1            | NM_000321       | 0.80                                             |
|          |       |                                              | hCT001162        | HMGCR          | NM_000859       | 0.88                                             |
|          |       |                                              | hCT001270        | HMGCR          | NM_000859       | 0.87                                             |
|          |       |                                              | hHR017590        | SNX12          | NM_013346       | 0.80                                             |
|          |       |                                              | hHR018634        | SRP72          | NM_006947       | 0.85                                             |
|          |       |                                              | hHA033034        | UBE3A          | NM_130839       | 1.00                                             |
|          |       |                                              | hHA033322        | GNAQ           | NM_002072       | 0.81                                             |
|          |       |                                              | hHA037078        | SETD3          | NM_032233       | 0.80                                             |
|          |       |                                              | hHA038794        | G3BP2          | NM_203505       | 0.83                                             |
|          |       |                                              | hCT001198        | RB1            | NM_000321       | 0.83                                             |
|          |       |                                              | hCT001186        | HMGCR          | NM_000859       | 0.91                                             |
|          |       |                                              | hCT001294        | HMGCR          | NM_000859       | 0.93                                             |
|          |       |                                              | hHC020782        | SNX12          | NM_013346       | 0.81                                             |
|          |       |                                              | hCT001210        | HMGCR          | NM_000859       | 0.94                                             |
|          |       |                                              | hCT001318        | HMGCR          | NM_000859       | 0.92                                             |
|          |       |                                              | hHA035578        | ZMYND11        | NM_006624       | 0.83                                             |
|          |       |                                              | hCT001234        | HMGCR          | NM_000859       | 0.85                                             |
|          |       |                                              | hCT001342        | HMGCR          | NM_000859       | 0.80                                             |
|          |       |                                              | hCT001161        | HMGCR          | NM_000859       | 0.94                                             |
|          |       |                                              | hCT001269        | HMGCR          | NM_000859       | 0.95                                             |
|          |       |                                              | hHC004341        | MAP2K6         | U39657          | 0.85                                             |
|          |       |                                              | hHR027573        | ENST0000033211 | ENST00000332119 | 0.81                                             |
|          |       |                                              | hHA035253        | USP14          | NM_005151       | 0.83                                             |
|          |       |                                              | hHA035337        | SPAG9          | NM_001130528    | 0.85                                             |

Table S4 Coexpression

| Gene Set | Probe | Pre-natally enriched Disease-associated Gene | Correlated Probe | Gene     | Accession    | Pearson's Correlation Coefficient (RIN Adjusted) |
|----------|-------|----------------------------------------------|------------------|----------|--------------|--------------------------------------------------|
|          |       |                                              | hHA038613        | WDR17    | NM_170710    | 0.83                                             |
|          |       |                                              | hHA040713        | UHRF2    | NM_152896    | 0.81                                             |
|          |       |                                              | hCT001197        | RB1      | NM_000321    | 0.83                                             |
|          |       |                                              | hCT001293        | HMGCR    | NM_000859    | 0.88                                             |
|          |       |                                              | hCT001281        | OCRL     | NM_000276    | 0.83                                             |
|          |       |                                              | hCT001473        | RB1      | NM_000321    | 0.82                                             |
|          |       |                                              | hHA037869        | USP46    | NM_001134223 | 0.84                                             |
|          |       |                                              | hCT001317        | HMGCR    | NM_000859    | 0.84                                             |
|          |       |                                              | hHC016293        | ZEB2     | NM_014795    | 0.84                                             |
|          |       |                                              | hHA033381        | NCOA4    | NM_005437    | 0.87                                             |
|          |       |                                              | hHA035193        | INPP5F   | NM_014937    | 0.83                                             |
|          |       |                                              | hCT001245        | RB1      | M15400       | 0.81                                             |
|          |       |                                              | hCT001341        | HMGCR    | NM_000859    | 0.90                                             |
|          |       |                                              | hHA035601        | ZMYM6    | NM_007167    | 0.83                                             |
|          |       |                                              | hCT001268        | HMGCR    | NM_000859    | 0.94                                             |
|          |       |                                              | hCT001448        | RB1      | NM_000321    | 0.87                                             |
|          |       |                                              | hHR025556        | API5     | NR_024625    | 0.80                                             |
|          |       |                                              | hHA037652        | SPAG9    | AK024068     | 0.84                                             |
|          |       |                                              | hHE041108        | CSNK1A1  | CN267058     | 0.84                                             |
|          |       |                                              | hCT001196        | RB1      | NM_000321    | 0.84                                             |
|          |       |                                              | hHA037964        | ATF2     | NM_001880    | 0.84                                             |
|          |       |                                              | hCT001316        | HMGCR    | NM_000859    | 0.92                                             |
|          |       |                                              | hHC015992        | CUL2     | NM_003591    | 0.80                                             |
|          |       |                                              | hCT001340        | HMGCR    | NM_000859    | 0.88                                             |
|          |       |                                              | hCT001520        | RB1      | NM_000321    | 0.85                                             |
|          |       |                                              | hHC002588        | NCOA2    | NM_006540    | 0.81                                             |
|          |       |                                              | hCT001171        | RB1      | NM_000321    | 0.80                                             |
|          |       |                                              | hHC009223        | WDR26    | NM_025160    | 0.84                                             |
|          |       |                                              | hHA034567        | HECTD2   | NM_182765    | 0.85                                             |
|          |       |                                              | hHC005983        | ATXN3    | NM_004993    | 0.85                                             |
|          |       |                                              | hHA039691        | SLC30A5  | NM_022902    | 0.88                                             |
|          |       |                                              | hHC009943        | CACNA2D1 | NM_000722    | 0.83                                             |
|          |       |                                              | hHC010327        | PHF6     | NM_032458    | 0.88                                             |
|          |       |                                              | hHA034363        | YME1L1   | NM_139312    | 0.81                                             |
|          |       |                                              | hHC020934        | CHUK     | NM_001278    | 0.81                                             |
|          |       |                                              | hHA038142        | C9orf72  | NM_018325    | 0.84                                             |
|          |       |                                              | hHR007254        | ZBTB26   | NM_020924    | 0.82                                             |
|          |       |                                              | hHA033942        | MBOAT2   | NM_138799    | 0.83                                             |
|          |       |                                              | hHA035670        | C9orf72  | NM_018325    | 0.84                                             |
|          |       |                                              | hHA033870        | SLC30A5  | NM_022902    | 0.85                                             |
|          |       |                                              | hHA035514        | SNX14    | NM_153816    | 0.83                                             |
|          |       |                                              | hHR014321        | CK818803 | CK818803     | 0.85                                             |
|          |       |                                              | hHC025829        | ZKSCAN1  | NM_003439    | 0.82                                             |
|          |       |                                              | hHC021053        | MAPK8    | NM_139046    | 0.81                                             |

Table S4 Coexpression

| Gene Set | Probe     | Pre-natally enriched Disease-associated Gene | Correlated Probe | Gene     | Accession    | Pearson's Correlation Coefficient (RIN Adjusted) |
|----------|-----------|----------------------------------------------|------------------|----------|--------------|--------------------------------------------------|
|          |           |                                              | hHC024053        | CSNK1G3  | NM_001044723 | 0.85                                             |
|          |           |                                              | hHC027940        | ZNF770   | NM_014106    | 0.83                                             |
|          |           |                                              | hHA035440        | MBTPS1   | NM_003791    | 0.82                                             |
|          |           |                                              | hHC014703        | 11-Sep   | NM_018243    | 0.86                                             |
|          |           |                                              | hHA034347        | OSBPL6   | NM_032523    | 0.80                                             |
|          |           |                                              | hHA034443        | MTMR2    | NR_023356    | 0.84                                             |
|          |           |                                              | hCT001262        | OCRL     | NM_000276    | 0.81                                             |
|          |           |                                              | hHA036770        | PPP2R5C  | NM_002719    | 0.80                                             |
|          |           |                                              | hHA035654        | WDR17    | NM_170710    | 0.85                                             |
|          |           |                                              | hHA039302        | C9orf72  | NM_018325    | 0.84                                             |
|          |           |                                              | hCT001334        | OCRL     | NM_000276    | 0.81                                             |
|          |           |                                              | hHA033002        | MATR3    | NM_199189    | 0.85                                             |
|          |           |                                              | hCT001189        | HMGCR    | NM_000859    | 0.83                                             |
|          |           |                                              | hHC007333        | BM312210 | BM312210     | 0.81                                             |
|          |           |                                              | hHC008377        | GOPC     | NM_020399    | 0.83                                             |
|          |           |                                              | hHA036025        | TCF12    | NM_207037    | 0.82                                             |
|          |           |                                              | hHA037573        | CSE1L    | NM_001316    | 0.82                                             |
|          |           |                                              | hCT001213        | HMGCR    | NM_000859    | 0.83                                             |
|          |           |                                              | hHA035677        | INPP5F   | NM_014937    | 0.88                                             |
|          |           |                                              | hCT001237        | HMGCR    | NM_000859    | 0.80                                             |
|          |           |                                              | hCT001333        | OCRL     | NM_000276    | 0.84                                             |
| ASD CNV  | hHC021811 | VPS37D                                       | hHC020015        | TESK1    | NM_006285    | 0.80                                             |
|          |           |                                              | hHC020445        | MKL1     | NM_020831    | 0.80                                             |
|          |           |                                              | hHC021811        | VPS37D   | NM_001077621 | 1.00                                             |
| ASD CNV  | hHC014115 | ZNF74                                        | hHC014115        | ZNF74    | NM_003426    | 1.00                                             |
| ASD DB   | hHC017702 | ST8SIA2                                      | hHA033838        | C1orf103 | NM_018372    | 0.83                                             |
|          |           |                                              | hHC028514        | ALG10B   | NM_001013620 | 0.81                                             |
|          |           |                                              | hHC017702        | ST8SIA2  | NM_006011    | 1.00                                             |
|          |           |                                              | hHA038941        | DDX17    | NM_001098504 | 0.81                                             |
| ASD DB   | hHC022670 | A2BP1                                        | hHC001488        | TP63     | NM_003722    | 0.82                                             |
|          |           |                                              | hHC030047        | DGCR5    | X91348       | 0.83                                             |
|          |           |                                              | hHA036525        | GGA2     | AF323754     | 0.84                                             |
|          |           |                                              | hHC022670        | A2BP1    | NM_018723    | 1.00                                             |
| ASD DB   | hHA037442 | ADNP                                         | hHA037442        | ADNP     | NM_015339    | 1.00                                             |
| ASD DB   | hHC002880 | AFF4                                         | hHC010692        | STX16    | NM_001001433 | 0.80                                             |
|          |           |                                              | hHC002880        | AFF4     | NM_014423    | 1.00                                             |
|          |           |                                              | hHC012960        | TMTC2    | NM_152588    | 0.81                                             |
|          |           |                                              | hHC005015        | SP4      | NM_003112    | 0.83                                             |
|          |           |                                              | hHR008704        | BG292040 | BG292040     | 0.80                                             |
| ASD DB   | hHA034365 | ANK3                                         | hHA034403        | NRXN1    | NM_001135659 | 0.85                                             |
|          |           |                                              | hHA036742        | NRXN1    | NM_001135659 | 0.80                                             |
|          |           |                                              | hHC002037        | APC      | NM_001127511 | 0.84                                             |
|          |           |                                              | hHA035661        | NRXN1    | NM_001135659 | 0.87                                             |
|          |           |                                              | hHA034365        | ANK3     | NM_020987    | 1.00                                             |



Table S4 Coexpression

| Gene Set | Probe     | Pre-natally enriched Disease-associated Gene | Correlated Probe | Gene      | Accession    | Pearson's Correlation Coefficient (RIN Adjusted) |
|----------|-----------|----------------------------------------------|------------------|-----------|--------------|--------------------------------------------------|
|          |           |                                              | hHC014372        | PCDHA1    | NM_018900    | 0.81                                             |
|          |           |                                              | hHC009631        | CDKL1     | NM_004196    | 0.81                                             |
|          |           |                                              | hHC014371        | PCDHA1    | NM_018900    | 0.83                                             |
|          |           |                                              | hHA035369        | NRXN1     | NM_001135659 | 0.81                                             |
| ASD DB   | hHA034118 | APC                                          | hHC015725        | JMJD2A    | NM_014663    | 0.81                                             |
|          |           |                                              | hHA034118        | APC       | NM_001127511 | 1.00                                             |
|          |           |                                              | hHA035870        | ANK3      | NM_020987    | 0.82                                             |
|          |           |                                              | hHA035701        | MACF1     | NM_012090    | 0.80                                             |
| ASD DB   | hHC003332 | AUTS2                                        | hHR030827        | HMGN1     | NM_004965    | 0.80                                             |
|          |           |                                              | hHC003332        | AUTS2     | NM_015570    | 1.00                                             |
|          |           |                                              | hHC030775        | RPS24     | NM_001142285 | 0.83                                             |
|          |           |                                              | hHC005526        | FDFT1     | NM_004462    | 0.83                                             |
|          |           |                                              | hHC007037        | VCAN      | NM_004385    | 0.86                                             |
|          |           |                                              | hHR029537        | BTF3      | NM_001037637 | 0.82                                             |
|          |           |                                              | hHC029645        | HNRPDL    | NR_003249    | 0.81                                             |
|          |           |                                              | hHC029931        | HMGN1     | NM_004965    | 0.81                                             |
|          |           |                                              | hHR030086        | HNRPA1L-2 | NR_002944    | 0.80                                             |
|          |           |                                              | hHR009745        | FOXG1     | NM_005249    | 0.82                                             |
|          |           |                                              | hHC031741        | EEF1B2    | NM_001959    | 0.83                                             |
| ASD DB   | hHA033818 | BCL2                                         | hHC002540        | BCL2      | NM_000633    | 0.91                                             |
|          |           |                                              | hHA033818        | BCL2      | NM_000633    | 1.00                                             |
| ASD DB   | hHC005360 | BRCA2                                        | hHC005360        | BRCA2     | NM_000059    | 1.00                                             |
|          |           |                                              | hHR015258        | ZNF90     | CR593334     | 0.84                                             |
| ASD DB   | hHC005422 | CACNA1H                                      | hHC005422        | CACNA1H   | NM_021098    | 1.00                                             |
| ASD DB   | hHR011178 | CADM1                                        | hHR011178        | CADM1     | NM_014333    | 1.00                                             |
| ASD DB   | hHR025141 | CHRNA7                                       | hHR025141        | CHRNA7    | NM_000746    | 1.00                                             |
| ASD DB   | hHA036352 | CLTCL1                                       | hHA036352        | CLTCL1    | NM_007098    | 1.00                                             |
| ASD DB   | hHR004942 | CNTN3                                        | hHR004942        | CNTN3     | NM_020872    | 1.00                                             |
|          |           |                                              | hHC004915        | KCNC2     | NM_139136    | 0.87                                             |
|          |           |                                              | hHC007949        | CNTN3     | NM_020872    | 0.88                                             |
| ASD DB   | hHA040420 | CNTN4                                        | hHC004824        | TAPT1     | NM_153365    | 0.80                                             |
|          |           |                                              | hHC014076        | FBXW7     | NM_033632    | 0.84                                             |
|          |           |                                              | hHC013140        | NLN       | AB033052     | 0.82                                             |
|          |           |                                              | hHA040128        | FGF12     | NM_004113    | 0.84                                             |
|          |           |                                              | hHC018263        | LOC150568 | AK126958     | 0.86                                             |
|          |           |                                              | hHC008950        | CCBE1     | NM_133459    | 0.80                                             |
|          |           |                                              | hHE040906        | PDE4D     | NM_001104631 | 0.81                                             |
|          |           |                                              | hHC016930        | ANO4      | NM_178826    | 0.84                                             |
|          |           |                                              | hHC003081        | TNFRSF21  | NM_014452    | 0.85                                             |
|          |           |                                              | hHR004521        | HS3ST5    | NM_153612    | 0.87                                             |
|          |           |                                              | hHC003777        | NAV3      | NM_014903    | 0.80                                             |
|          |           |                                              | hHC008097        | LDB2      | NM_001130834 | 0.81                                             |
|          |           |                                              | hHC014625        | IL7       | NM_000880    | 0.81                                             |
|          |           |                                              | hHC015105        | ARPP-21   | NM_016300    | 0.81                                             |

Table S4 Coexpression

| Gene Set | Probe     | Pre-natally enriched Disease-associated Gene | Correlated Probe | Gene      | Accession    | Pearson's Correlation Coefficient (RIN Adjusted) |
|----------|-----------|----------------------------------------------|------------------|-----------|--------------|--------------------------------------------------|
|          |           |                                              | hHC020013        | TAL2      | BC126375     | 0.83                                             |
|          |           |                                              | hHC013509        | RSPO3     | NM_032784    | 0.83                                             |
|          |           |                                              | hHC027321        | SRM       | NM_003132    | 0.85                                             |
|          |           |                                              | hHC011889        | HS3ST5    | NM_153612    | 0.86                                             |
|          |           |                                              | hHC018609        | STK32B    | NM_018401    | 0.86                                             |
|          |           |                                              | hHC005000        | KLHL14    | NM_020805    | 0.86                                             |
|          |           |                                              | hHC010964        | FAM134B   | NM_001034850 | 0.81                                             |
|          |           |                                              | hHC007616        | RNF150    | NM_020724    | 0.82                                             |
|          |           |                                              | hHC008960        | NKAIN2    | NM_001040214 | 0.83                                             |
|          |           |                                              | hHC004100        | UST       | NM_005715    | 0.85                                             |
|          |           |                                              | hHA038780        | FGF12     | NM_004113    | 0.81                                             |
|          |           |                                              | hHC008455        | CALN1     | NM_001017440 | 0.84                                             |
|          |           |                                              | hHA035634        | CNTN4     | NM_175607    | 0.86                                             |
|          |           |                                              | hHC015330        | RPRM      | NM_019845    | 0.80                                             |
|          |           |                                              | hHR002609        | LOC150568 | NR_015399    | 0.81                                             |
|          |           |                                              | hHR028841        | USP6      | NM_004505    | 0.81                                             |
|          |           |                                              | hHA040420        | CNTN4     | NM_175607    | 1.00                                             |
|          |           |                                              | hHC011932        | MDGA1     | NM_153487    | 0.86                                             |
|          |           |                                              | hHR012315        | AV727085  | AV727085     | 0.81                                             |
|          |           |                                              | hHC003711        | ADAMTSL3  | NM_207517    | 0.88                                             |
|          |           |                                              | hHC019179        | RSPO3     | NM_032784    | 0.82                                             |
|          |           |                                              | hHC020919        | UST       | NM_005715    | 0.86                                             |
|          |           |                                              | hHR011906        | RIMBP2    | NM_015347    | 0.81                                             |
|          |           |                                              | hHC025730        | NHSL1     | NM_001144060 | 0.84                                             |
|          |           |                                              | hHC009926        | SH3GL3    | NM_003027    | 0.86                                             |
|          |           |                                              | hHC020666        | SLN       | NM_003063    | 0.82                                             |
|          |           |                                              | hHR001898        | KIAA1239  | NM_001144990 | 0.83                                             |
|          |           |                                              | hHC002666        | ITPR1     | NM_001099952 | 0.82                                             |
|          |           |                                              | hHC004537        | LRRC8B    | NM_015350    | 0.84                                             |
|          |           |                                              | hHA036049        | FBXW7     | NM_018315    | 0.84                                             |
| ASD DB   | hHR030569 | CNTNAP3                                      | hHR030569        | CNTNAP3   | NM_033655    | 1.00                                             |
| ASD DB   | hHC004724 |                                              | hHC004724        | CTTNBP2   | NM_033427    | 1.00                                             |
|          |           |                                              | hHC009653        | ST18      | NM_014682    | 0.81                                             |
| ASD DB   | hHE041224 | DAB1                                         | hHE041224        | DAB1      | AB210012     | 1.00                                             |
| ASD DB   | hHC008562 |                                              | hHC008562        | DAPK1     | NM_004938    | 1.00                                             |
|          |           |                                              | hHC007012        | OLIG1     | NM_138983    | 0.80                                             |
|          |           |                                              | hHR003231        | NRXN3     | NM_004796    | 0.85                                             |
|          |           |                                              | hHC010359        | NRXN3     | NM_004796    | 0.85                                             |
|          |           |                                              | hHC006218        | RAPGEF4   | NM_007023    | 0.82                                             |
| ASD DB   | hHR027462 | DCTN5                                        | hHR027462        | DCTN5     | NM_032486    | 1.00                                             |
| ASD DB   | hHC016253 | DIAPH3                                       | hHC016253        | DIAPH3    | NM_030932    | 1.00                                             |
| ASD DB   | hHC006676 | DLX1                                         | hHA034101        | GAD1      | NM_000817    | 0.81                                             |
|          |           |                                              | hHR012667        | FLJ34048  | AK095619     | 0.84                                             |
|          |           |                                              | hHC005550        | GAD1      | NM_000817    | 0.81                                             |

Table S4 Coexpression

| Gene Set | Probe     | Pre-natally enriched Disease-associated Gene | Correlated Probe | Gene        | Accession    | Pearson's Correlation Coefficient (RIN Adjusted) |
|----------|-----------|----------------------------------------------|------------------|-------------|--------------|--------------------------------------------------|
|          |           |                                              | hHC006280        | DLX2        | NM_004405    | 0.86                                             |
|          |           |                                              | hHC006676        | DLX1        | NM_178120    | 1.00                                             |
|          |           |                                              | hHC003820        | SLAIN1      | NM_001040153 | 0.83                                             |
|          |           |                                              | hHC009410        | FLJ34048    | AK055423     | 0.84                                             |
|          |           |                                              | hHC013969        | FLJ34048    | AK095619     | 0.84                                             |
| ASD DB   | hHC006280 | DLX2                                         | hHC006356        | LOC285084   | AL833646     | 0.85                                             |
|          |           |                                              | hHR012667        | FLJ34048    | AK095619     | 0.88                                             |
|          |           |                                              | hHC006280        | DLX2        | NM_004405    | 1.00                                             |
|          |           |                                              | hHC006676        | DLX1        | NM_178120    | 0.86                                             |
|          |           |                                              | hHC010359        | NRXN3       | NM_004796    | 0.83                                             |
|          |           |                                              | hHC009410        | FLJ34048    | AK055423     | 0.84                                             |
|          |           |                                              | hHA034226        | GAD1        | NM_000817    | 0.82                                             |
|          |           |                                              | hHC013969        | FLJ34048    | AK095619     | 0.91                                             |
| ASD DB   | hHC030864 | EIF4E                                        | hHC030864        | EIF4E       | NM_001130679 | 1.00                                             |
| ASD DB   | hHR029057 | EIF4EBP2                                     | hHR029057        | EIF4EBP2    | NM_004096    | 1.00                                             |
| ASD DB   | hHC012239 | EP300                                        | hHC012239        | EP300       | NM_001429    | 1.00                                             |
| ASD DB   | hHR012430 | EP400                                        | hHA036816        | (KIAA0174), | DA947565     | 0.82                                             |
|          |           |                                              | hHA038436        | DIP2A       | NM_015151    | 0.81                                             |
|          |           |                                              | hHC015828        | GTF3C2      | NM_001521    | 0.86                                             |
|          |           |                                              | hCT001175        | RB1         | NM_000321    | 0.81                                             |
|          |           |                                              | hHC022487        | TBL2        | NM_012453    | 0.82                                             |
|          |           |                                              | hHA035555        | SEC24B      | NM_006323    | 0.89                                             |
|          |           |                                              | hHR012430        | EP400       | NM_015409    | 1.00                                             |
|          |           |                                              | hHA039105        | PBRM1       | NM_018313    | 0.80                                             |
|          |           |                                              | hHA037592        | FAM178A     | NM_018121    | 0.82                                             |
|          |           |                                              | hHC015187        | PATZ1       | NM_014323    | 0.82                                             |
|          |           |                                              | hHC024247        | PRRC1       | NM_130809    | 0.84                                             |
|          |           |                                              | hHC025829        | ZKSCAN1     | NM_003439    | 0.84                                             |
| ASD DB   | hHC020957 | EPHB2                                        | hHC020957        | EPHB2       | NM_004442    | 1.00                                             |
| ASD DB   | hHC017900 |                                              | hHC017900        | FEZF2       | NM_018008    | 1.00                                             |
|          |           |                                              | hHR008287        | C14orf23    | NR_026731    | 0.83                                             |
|          |           |                                              | hHC009653        | ST18        | NM_014682    | 0.82                                             |
| ASD DB   | hHC030717 | GPD2                                         | hHC030717        | GPD2        | NM_001083112 | 1.00                                             |
| ASD DB   | hHC019020 | GRIK2                                        | hHC019020        | GRIK2       | NM_175768    | 1.00                                             |
|          |           |                                              | hCT001188        | HMGCR       | NM_000859    | 0.80                                             |
|          |           |                                              | hHA038748        | MACF1       | NM_012090    | 0.82                                             |
|          |           |                                              | hCT001271        | HMGCR       | NM_000859    | 0.84                                             |
|          |           |                                              | hHA038079        | MACF1       | NM_012090    | 0.82                                             |
|          |           |                                              | hCT001189        | HMGCR       | NM_000859    | 0.80                                             |
| ASD DB   | hHR016670 | GRIP1                                        | hHR017492        | ZEB2        | NM_014795    | 0.80                                             |
|          |           |                                              | hHC024017        | SETMAR      | NR_024022    | 0.82                                             |
|          |           |                                              | hHA037157        | MAP4K4      | BC064691     | 0.82                                             |
|          |           |                                              | hHR016670        | GRIP1       | NM_021150    | 1.00                                             |
|          |           |                                              | hHC027553        | ZNF486      | NM_052852    | 0.81                                             |

Table S4 Coexpression

| Gene Set | Probe     | Pre-natally enriched Disease-associated Gene | Correlated Probe | Gene      | Accession    | Pearson's Correlation Coefficient (RIN Adjusted) |
|----------|-----------|----------------------------------------------|------------------|-----------|--------------|--------------------------------------------------|
| ASD DB   | hHR024272 | GSK3B                                        | hHR024272        | GSK3B     | NM_002093    | 1.00                                             |
| ASD DB   | hHC011966 | GUCY1A2                                      | hHC011966        | GUCY1A2   | NM_000855    | 1.00                                             |
| ASD DB   | hHC005088 | HDAC4                                        | hHC005088        | HDAC4     | NM_006037    | 1.00                                             |
| ASD DB   | hHR030827 | HMG1                                         | hHR030827        | HMG1      | NM_004965    | 1.00                                             |
|          |           |                                              | hHC009743        | FOYG1     | NM_005249    | 0.81                                             |
|          |           |                                              | hHC003332        | AUTS2     | NM_015570    | 0.80                                             |
|          |           |                                              | hHC030775        | RPS24     | NM_001142285 | 0.81                                             |
|          |           |                                              | hHC029645        | HNRPD     | NR_003249    | 0.82                                             |
|          |           |                                              | hHC029931        | HMG1      | NM_004965    | 0.82                                             |
|          |           |                                              | hHR030086        | HNRPA1L-2 | NR_002944    | 0.86                                             |
| ASD DB   | hHR004521 | HS3ST5                                       | hHA040128        | FGF12     | NM_004113    | 0.81                                             |
|          |           |                                              | hHC013931        | FGF12     | NM_021032    | 0.86                                             |
|          |           |                                              | hHC008950        | CCBE1     | NM_133459    | 0.82                                             |
|          |           |                                              | hHC016930        | ANO4      | NM_178826    | 0.84                                             |
|          |           |                                              | hHC003081        | TNFRSF21  | NM_014452    | 0.84                                             |
|          |           |                                              | hHR004521        | HS3ST5    | NM_153612    | 1.00                                             |
|          |           |                                              | hHC003777        | NAV3      | NM_014903    | 0.82                                             |
|          |           |                                              | hHC008097        | LDB2      | NM_001130834 | 0.82                                             |
|          |           |                                              | hHC020013        | TAL2      | BC126375     | 0.88                                             |
|          |           |                                              | hHC027321        | SRM       | NM_003132    | 0.85                                             |
|          |           |                                              | hHC011889        | HS3ST5    | NM_153612    | 0.94                                             |
|          |           |                                              | hHC005000        | KLHL14    | NM_020805    | 0.87                                             |
|          |           |                                              | hHA035912        | GRM7      | BC136458     | 0.81                                             |
|          |           |                                              | hHC004100        | UST       | NM_005715    | 0.83                                             |
|          |           |                                              | hHA038780        | FGF12     | NM_004113    | 0.82                                             |
|          |           |                                              | hHC008455        | CALN1     | NM_001017440 | 0.85                                             |
|          |           |                                              | hHC011395        | FZD4      | NM_012193    | 0.82                                             |
|          |           |                                              | hHR010109        | TBC1D30   | AB023201     | 0.81                                             |
|          |           |                                              | hHR028841        | USP6      | NM_004505    | 0.86                                             |
|          |           |                                              | hHA040420        | CNTN4     | NM_175607    | 0.87                                             |
|          |           |                                              | hHC011932        | MDGA1     | NM_153487    | 0.82                                             |
|          |           |                                              | hHR012315        | AV727085  | AV727085     | 0.81                                             |
|          |           |                                              | hHC020919        | UST       | NM_005715    | 0.88                                             |
|          |           |                                              | hHC020666        | SLN       | NM_003063    | 0.81                                             |
| ASD DB   | hHA035416 | ITGB3BP                                      | hHC029136        | PTTG1     | NM_004219    | 0.83                                             |
|          |           |                                              | hHC022115        | TP53I13   | NM_138349    | 0.83                                             |
|          |           |                                              | hHC023951        | AURKA     | NM_198433    | 0.83                                             |
|          |           |                                              | hHC014459        | CCNA2     | NM_001237    | 0.81                                             |
|          |           |                                              | hHA033311        | ITGB1     | NM_002211    | 0.82                                             |
|          |           |                                              | hHC011818        | RAB32     | NM_006834    | 0.85                                             |
|          |           |                                              | hHC005794        | KIAA0101  | NM_014736    | 0.86                                             |
|          |           |                                              | hHC015970        | CENPM     | NM_024053    | 0.84                                             |
|          |           |                                              | hHC004018        | BRCA1     | NM_007295    | 0.84                                             |
|          |           |                                              | hHC007762        | CDCA5     | NM_080668    | 0.85                                             |

Table S4 Coexpression

| Gene Set | Probe | Pre-natally enriched Disease-associated Gene | Correlated Probe | Gene     | Accession    | Pearson's Correlation Coefficient (RIN Adjusted) |
|----------|-------|----------------------------------------------|------------------|----------|--------------|--------------------------------------------------|
|          |       |                                              | hHC010473        | AP3M1    | NM_207012    | 0.81                                             |
|          |       |                                              | hHR012993        | FZD2     | NM_001466    | 0.82                                             |
|          |       |                                              | hHC004389        | WEE1     | NM_003390    | 0.81                                             |
|          |       |                                              | hHC006489        | TYMS     | NM_001071    | 0.83                                             |
|          |       |                                              | hHR017349        | MAD2L1   | NM_002358    | 0.88                                             |
|          |       |                                              | hHR025605        | CDC25A   | NM_001789    | 0.84                                             |
|          |       |                                              | hHR028665        | CR625830 | CR625830     | 0.84                                             |
|          |       |                                              | hHC030981        | GMPS     | NM_003875    | 0.83                                             |
|          |       |                                              | hHC007965        | C21orf45 | NM_018944    | 0.84                                             |
|          |       |                                              | hHR003572        | RTKN2    | NM_145307    | 0.82                                             |
|          |       |                                              | hHC004040        | CDC45L   | NM_003504    | 0.85                                             |
|          |       |                                              | hHC008264        | H2AFX    | NM_002105    | 0.84                                             |
|          |       |                                              | hHC007628        | RFX2     | NM_000635    | 0.84                                             |
|          |       |                                              | hHC009920        | RFC4     | NM_181573    | 0.83                                             |
|          |       |                                              | hHA034304        | CDKN3    | NM_005192    | 0.80                                             |
|          |       |                                              | hHR002672        | KIF11    | NM_004523    | 0.86                                             |
|          |       |                                              | hHC004255        | C5orf34  | NM_198566    | 0.89                                             |
|          |       |                                              | hHC004459        | CLGN     | NM_001130675 | 0.83                                             |
|          |       |                                              | hHC009163        | C1orf112 | NM_018186    | 0.90                                             |
|          |       |                                              | hHC009931        | TCF19    | NM_007109    | 0.86                                             |
|          |       |                                              | hHC020863        | PXMP2    | NM_018663    | 0.81                                             |
|          |       |                                              | hHE041995        | C6orf173 | NM_001012507 | 0.81                                             |
|          |       |                                              | hHC009559        | FAM111A  | NM_001142520 | 0.85                                             |
|          |       |                                              | hHC003451        | SFRP2    | NM_003013    | 0.81                                             |
|          |       |                                              | hHA038287        | EEF1B2   | NM_001959    | 0.82                                             |
|          |       |                                              | hHC001986        | IL33     | NM_033439    | 0.84                                             |
|          |       |                                              | hHR004098        | SMC4     | NM_005496    | 0.82                                             |
|          |       |                                              | hHC006690        | GPC4     | NM_001448    | 0.83                                             |
|          |       |                                              | hHR023394        | FAM96A   | NM_032231    | 0.80                                             |
|          |       |                                              | hHA039906        | PCNA     | NM_182649    | 0.83                                             |
|          |       |                                              | hHC003354        | ATAD2    | NM_014109    | 0.83                                             |
|          |       |                                              | hHC004014        | BMP7     | NM_001719    | 0.83                                             |
|          |       |                                              | hHR005105        | RAD51AP1 | NM_001130862 | 0.85                                             |
|          |       |                                              | hHA033701        | SLC30A5  | NM_024055    | 0.80                                             |
|          |       |                                              | hHC003593        | C6orf167 | NM_198468    | 0.86                                             |
|          |       |                                              | hHC027497        | GINS4    | NM_032336    | 0.82                                             |
|          |       |                                              | hHC006593        | SMC4     | NM_005496    | 0.86                                             |
|          |       |                                              | hHC016577        | CCNB1    | NM_031966    | 0.87                                             |
|          |       |                                              | hHA033857        | NUSAP1   | NM_016359    | 0.84                                             |
|          |       |                                              | hHC007277        | STK33    | NM_030906    | 0.84                                             |
|          |       |                                              | hHC013913        | EPHB4    | NM_004444    | 0.86                                             |
|          |       |                                              | hHR017092        | NEK2     | NM_002497    | 0.85                                             |
|          |       |                                              | hHA034312        | PRDM2    | NM_015866    | 0.83                                             |
|          |       |                                              | hHC001792        | NUP37    | NM_024057    | 0.82                                             |

Table S4 Coexpression

| Gene Set | Probe     | Pre-natally enriched Disease-associated Gene | Correlated Probe | Gene           | Accession      | Pearson's Correlation Coefficient (RIN Adjusted) |
|----------|-----------|----------------------------------------------|------------------|----------------|----------------|--------------------------------------------------|
|          |           |                                              | hHR006016        | ENST0000036848 | ENST0000036848 | 0.84                                             |
|          |           |                                              | hHC006208        | SPAG5          | NM_006461      | 0.86                                             |
|          |           |                                              | hHC008212        | DNMBP          | NM_015221      | 0.84                                             |
|          |           |                                              | hHC014176        | CENPE          | NM_001813      | 0.90                                             |
|          |           |                                              | hHC011224        | ZNRD1          | NM_170783      | 0.81                                             |
|          |           |                                              | hHC021592        | TK1            | NM_003258      | 0.85                                             |
|          |           |                                              | hHC008847        | NUF2           | NM_145697      | 0.83                                             |
|          |           |                                              | hHC009603        | FAM83D         | NM_030919      | 0.86                                             |
|          |           |                                              | hHC027267        | STIL           | NM_001048166   | 0.86                                             |
|          |           |                                              | hHR017511        | CKS2           | NM_001827      | 0.86                                             |
|          |           |                                              | hHC027387        | TULP3          | NM_003324      | 0.85                                             |
|          |           |                                              | hHC002547        | TPR            | NM_003292      | 0.83                                             |
|          |           |                                              | hHC004851        | ITGB3BP        | NM_014288      | 0.94                                             |
|          |           |                                              | hHR010899        | LOC388588      | NR_024432      | 0.84                                             |
|          |           |                                              | hHC011295        | NUSAP1         | NM_016359      | 0.84                                             |
|          |           |                                              | hHC028467        | 10-Sep         | NM_144710      | 0.82                                             |
|          |           |                                              | hHC012087        | RAD51          | NM_002875      | 0.82                                             |
|          |           |                                              | hHR015831        | EPR1           | NM_001012271   | 0.81                                             |
|          |           |                                              | hHC026199        | CDKN3          | NM_005192      | 0.81                                             |
|          |           |                                              | hHC002402        | BUB1B          | NM_001211      | 0.82                                             |
|          |           |                                              | hHC006926        | NSBP1          | NM_030763      | 0.85                                             |
|          |           |                                              | hHR011618        | C6orf173       | NM_001012507   | 0.82                                             |
|          |           |                                              | hHC020474        | CDCA3          | NM_031299      | 0.81                                             |
|          |           |                                              | hHC027578        | CCNB2          | NM_004701      | 0.82                                             |
|          |           |                                              | hHC029222        | CKS2           | NM_001827      | 0.86                                             |
|          |           |                                              | hHR003986        | MCM10          | NM_182751      | 0.87                                             |
|          |           |                                              | hHC013502        | SLC7A6OS       | AK091674       | 0.80                                             |
|          |           |                                              | hHC016862        | KIF18A         | NM_031217      | 0.84                                             |
|          |           |                                              | hHC019742        | PLCE1          | NM_016341      | 0.81                                             |
|          |           |                                              | hHC025682        | MTA3           | NM_020744      | 0.84                                             |
|          |           |                                              | hHC026750        | BTG3           | NM_001130914   | 0.81                                             |
|          |           |                                              | hHC029426        | DBF4           | NM_006716      | 0.86                                             |
|          |           |                                              | hHA038450        | RAD51          | NM_002875      | 0.80                                             |
|          |           |                                              | hHC004849        | NCAPH          | NM_015341      | 0.89                                             |
|          |           |                                              | hHC012913        | CHST14         | NM_130468      | 0.88                                             |
|          |           |                                              | hHC015229        | HMGB2          | NM_002129      | 0.83                                             |
|          |           |                                              | hHR017137        | RIT1           | NM_006912      | 0.82                                             |
|          |           |                                              | hHC027997        | PTTG3          | NR_002734      | 0.80                                             |
|          |           |                                              | hHC030397        | SAP30          | NM_003864      | 0.87                                             |
|          |           |                                              | hHC002281        | NR2E1          | NM_003269      | 0.86                                             |
|          |           |                                              | hHC007189        | NCK1           | NM_006153      | 0.82                                             |
| ASD DB   | hHC009434 | JARID2                                       | hHC013206        | JRK            | NM_003724      | 0.81                                             |
|          |           |                                              | hHC009434        | JARID2         | NM_004973      | 1.00                                             |
| ASD DB   | hHC023549 | JMJD1C                                       | hHA036996        | KCNH2          | NM_172056      | 0.82                                             |

Table S4 Coexpression

| Gene Set | Probe     | Pre-natally enriched Disease-associated Gene | Correlated Probe | Gene      | Accession    | Pearson's Correlation Coefficient (RIN Adjusted) |
|----------|-----------|----------------------------------------------|------------------|-----------|--------------|--------------------------------------------------|
|          |           |                                              | hHC023549        | JMJD1C    | NM_032776    | 1.00                                             |
|          |           |                                              | hHR002918        | JMJD1C    | AA358573     | 0.88                                             |
| ASD DB   | hHC008977 | KHDRBS2                                      | hHC005416        | SLC25A12  | NM_003705    | 0.81                                             |
|          |           |                                              | hHC005437        | AKAP6     | NM_004274    | 0.84                                             |
|          |           |                                              | hHC008977        | KHDRBS2   | NM_152688    | 1.00                                             |
| ASD DB   | hHC008010 | KIAA1586                                     | hHC008010        | KIAA1586  | NM_020931    | 1.00                                             |
| ASD DB   | hHC007864 | LAMA1                                        | hHR006282        | S1PR3     | NM_005226    | 0.83                                             |
|          |           |                                              | hHC007864        | LAMA1     | NM_005559    | 1.00                                             |
|          |           |                                              | hHC012913        | CHST14    | NM_130468    | 0.87                                             |
| ASD DB   | hHA037417 | LRRC1                                        | hHA034320        | LRRC1     | NM_018214    | 0.81                                             |
|          |           |                                              | hHC005448        | AASS      | NM_005763    | 0.84                                             |
|          |           |                                              | hHC010822        | THSD7A    | NM_015204    | 0.84                                             |
|          |           |                                              | hHR010821        | THSD7A    | NM_015204    | 0.82                                             |
|          |           |                                              | hHE042017        | AK129971  | AK129971     | 0.81                                             |
|          |           |                                              | hHA036365        | DACH1     | NM_080759    | 0.83                                             |
|          |           |                                              | hHC018854        | PHIP      | NM_017934    | 0.82                                             |
|          |           |                                              | hHC026725        | RBPJ      | NM_203284    | 0.85                                             |
|          |           |                                              | hHA035989        | LRRC1     | NM_018214    | 0.83                                             |
|          |           |                                              | hHA037417        | LRRC1     | NM_018214    | 1.00                                             |
| ASD DB   | hHC003436 | LRRC7                                        | hHC011244        | KIF5C     | NM_004522    | 0.81                                             |
|          |           |                                              | hHC013114        | PIK3CA    | NM_006218    | 0.80                                             |
|          |           |                                              | hHC011157        | LOC202451 | BC022980     | 0.82                                             |
|          |           |                                              | hHA034003        | SORBS1    | NM_001034954 | 0.80                                             |
|          |           |                                              | hHC002058        | PTPRK     | NM_001135648 | 0.81                                             |
|          |           |                                              | hHC003436        | LRRC7     | NM_020794    | 1.00                                             |
| ASD DB   | hHR007786 | MACROD2                                      | hHC011904        | GRIP1     | NM_021150    | 0.80                                             |
|          |           |                                              | hHR007786        | MACROD2   | BC128036     | 1.00                                             |
|          |           |                                              | hHC017203        | ACVR2A    | NM_001616    | 0.81                                             |
| ASD DB   | hHC022926 | MAP2                                         | hHC022926        | MAP2      | NM_002374    | 1.00                                             |
|          |           |                                              | hHA033006        | DHX9      | NM_001357    | 0.85                                             |
|          |           |                                              | hHA036558        | BAZ2B     | NM_013450    | 0.83                                             |
| ASD DB   | hHA035377 | MAPK1                                        | hHA035377        | MAPK1     | NM_138957    | 1.00                                             |
| ASD DB   | hHC007557 | MARK1                                        | hHC006083        | RRAGD     | NM_021244    | 0.82                                             |
|          |           |                                              | hHC001978        | FAM172A   | NM_032042    | 0.81                                             |
|          |           |                                              | hHC006586        | RHOBTB1   | NR_024556    | 0.80                                             |
|          |           |                                              | hHC007557        | MARK1     | NM_018650    | 1.00                                             |
|          |           |                                              | hHR009236        | FAM172A   | NM_032042    | 0.82                                             |
|          |           |                                              | hHC002058        | PTPRK     | NM_001135648 | 0.82                                             |
| ASD DB   | hHC004339 | MBD5                                         | hHC004339        | MBD5      | NM_018328    | 1.00                                             |
|          |           |                                              | hHR027830        | TAF9      | NM_001015892 | 0.80                                             |
| ASD DB   | hHC020288 | MBD6                                         | hHC030274        | GNG5      | NM_005274    | 0.82                                             |
|          |           |                                              | hHC020288        | MBD6      | NM_052897    | 1.00                                             |
|          |           |                                              | hHC022400        | SMO       | NM_005631    | 0.80                                             |
|          |           |                                              | hHC015005        | ASAP3     | NM_017707    | 0.84                                             |

Table S4 Coexpression

| Gene Set | Probe     | Pre-natally enriched Disease-associated Gene | Correlated Probe | Gene       | Accession    | Pearson's Correlation Coefficient (RIN Adjusted) |
|----------|-----------|----------------------------------------------|------------------|------------|--------------|--------------------------------------------------|
| ASD DB   | hHC015904 | MTHFR                                        | hHC015904        | MTHFR      | NM_005957    | 1.00                                             |
| ASD DB   | hHC007040 | MTR                                          | hHC007040        | MTR        | NM_000254    | 1.00                                             |
|          |           |                                              | hHC011332        | ASPHD2     | NM_020437    | 0.81                                             |
|          |           |                                              | hHR004141        | MTR        | NM_000254    | 0.80                                             |
| ASD DB   | hHC002233 |                                              | hHR009129        | ZNF706     | NM_001042510 | 0.81                                             |
|          |           |                                              | hHC002156        | CSGALNACT1 | NM_001130518 | 0.83                                             |
|          |           |                                              | hHC004525        | DAAM1      | NM_014992    | 0.83                                             |
|          |           |                                              | hHC008737        | GNG2       | NM_053064    | 0.85                                             |
|          |           |                                              | hHC002233        | NBEA       | NM_015678    | 1.00                                             |
|          |           |                                              | hHR026185        | SNX7       | NM_015976    | 0.84                                             |
|          |           |                                              | hHC027817        | SNX7       | NM_015976    | 0.85                                             |
| ASD DB   | hHC001484 | NFIA                                         | hHC016978        | ASTN2      | NM_198187    | 0.86                                             |
|          |           |                                              | hHC001484        | NFIA       | NM_001134673 | 1.00                                             |
| ASD DB   | hHA035333 | NRCAM                                        | hHA035333        | NRCAM      | NM_001037132 | 1.00                                             |
| ASD DB   | hHC009632 | NRP2                                         | hHC009632        | NRP2       | NM_001037132 | 1.00                                             |
| ASD DB   | hHC011290 | OTX1                                         | hHC011290        | OTX1       | NM_014562    | 1.00                                             |
|          |           |                                              | hHC019448        | PARD3B     | NM_152526    | 0.81                                             |
|          |           |                                              | hHA035860        | LMO7       | NM_015842    | 0.81                                             |
| ASD DB   | hHC020214 | PLAUR                                        | hHC027319        | TGIF2      | NM_021809    | 0.81                                             |
|          |           |                                              | hHC020214        | PLAUR      | NM_002659    | 1.00                                             |
| ASD DB   | hHA034135 | POGZ                                         | hHA034135        | POGZ       | NM_145796    | 1.00                                             |
| ASD DB   | hHA036085 | PSD3                                         | hHA036647        | MAP2       | NM_002374    | 0.82                                             |
|          |           |                                              | hHA037707        | ANK3       | NM_020987    | 0.81                                             |
|          |           |                                              | hHA036085        | PSD3       | NM_015310    | 1.00                                             |
| ASD DB   | hHR010614 | PTEN                                         | hHR010614        | PTEN       | NM_000314    | 1.00                                             |
| ASD DB   | hHC011816 | RAI1                                         | hHC011816        | RAI1       | NM_030665    | 1.00                                             |
| ASD DB   | hHC002741 | ROBO1                                        | hHC002741        | ROBO1      | NM_13363     | 1.00                                             |
| ASD DB   | hHA033097 | RORA                                         | hHA033097        | RORA       | NM_134260    | 1.00                                             |
| ASD DB   | hHC017824 | SETD2                                        | hHC017824        | SETD2      | NM_014159    | 1.00                                             |
| ASD DB   | hHC006984 | SETDB1                                       | hHC006984        | SETDB1     | BC028671     | 1.00                                             |
| ASD DB   | hHA034077 | SHANK2                                       | hHA034077        | SHANK2     | NM_012309    | 1.00                                             |
| ASD DB   | hHR018776 | SHANK3                                       | hHR018776        | SHANK3     | NM_001080420 | 1.00                                             |
| ASD DB   | hHC003620 | SLC25A24                                     | hHC006021        | CCDC99     | NM_017785    | 0.83                                             |
|          |           |                                              | hHC011961        | MRPL42     | NM_014050    | 0.83                                             |
|          |           |                                              | hHC003620        | SLC25A24   | NM_013386    | 1.00                                             |
| ASD DB   | hHA033870 | SLC30A5                                      | hHA037464        | CREB1      | NM_134442    | 0.81                                             |
|          |           |                                              | hHC010692        | STX16      | NM_001001433 | 0.88                                             |
|          |           |                                              | hHR025872        | ZNF12      | NM_016265    | 0.86                                             |
|          |           |                                              | hHA033252        | G3BP1      | NM_005754    | 0.81                                             |
|          |           |                                              | hHA038436        | DIP2A      | NM_015151    | 0.80                                             |
|          |           |                                              | hHA039504        | UBE3A      | NM_130839    | 0.85                                             |
|          |           |                                              | hHA033372        | ZNF532     | NM_018181    | 0.82                                             |
|          |           |                                              | hHA034332        | MBNL1      | NM_021038    | 0.86                                             |
|          |           |                                              | hCT001175        | RB1        | NM_000321    | 0.84                                             |



Table S4 Coexpression

| Gene Set | Probe | Pre-natally enriched Disease-associated Gene | Correlated Probe | Gene          | Accession    | Pearson's Correlation Coefficient (RIN Adjusted) |
|----------|-------|----------------------------------------------|------------------|---------------|--------------|--------------------------------------------------|
|          |       |                                              | hCT001163        | HMGCR         | NM_000859    | 0.83                                             |
|          |       |                                              | hCT001451        | RB1           | NM_000321    | 0.83                                             |
|          |       |                                              | hHC005015        | SP4           | NM_003112    | 0.83                                             |
|          |       |                                              | hHC026327        | GMFB          | NM_004124    | 0.81                                             |
|          |       |                                              | hCT001187        | HMGCR         | NM_000859    | 0.81                                             |
|          |       |                                              | hCT001295        | HMGCR         | NM_000859    | 0.81                                             |
|          |       |                                              | hHA034991        | HNRNPC        | AK126950     | 0.80                                             |
|          |       |                                              | hHA035279        | PPP1CB        | NM_002709    | 0.86                                             |
|          |       |                                              | hHA036431        | RNF138        | NM_016271    | 0.80                                             |
|          |       |                                              | hHA040739        | RNF138        | NM_016271    | 0.86                                             |
|          |       |                                              | hCT001211        | HMGCR         | NM_000859    | 0.85                                             |
|          |       |                                              | hCT001499        | RB1           | NM_000321    | 0.83                                             |
|          |       |                                              | hHA033083        | GTF2H1        | NM_001142307 | 0.85                                             |
|          |       |                                              | hCT001162        | HMGCR         | NM_000859    | 0.85                                             |
|          |       |                                              | hHA033034        | UBE3A         | NM_130839    | 0.85                                             |
|          |       |                                              | hCT001186        | HMGCR         | NM_000859    | 0.85                                             |
|          |       |                                              | hCT001294        | HMGCR         | NM_000859    | 0.84                                             |
|          |       |                                              | hHC007714        | CGGBP1        | NM_001008390 | 0.80                                             |
|          |       |                                              | hHC018478        | MAPK14        | NM_139012    | 0.79                                             |
|          |       |                                              | hCT001210        | HMGCR         | NM_000859    | 0.89                                             |
|          |       |                                              | hCT001318        | HMGCR         | NM_000859    | 0.84                                             |
|          |       |                                              | hHC022246        | CXorf15       | NM_018360    | 0.81                                             |
|          |       |                                              | hHA035482        | ATE1          | NM_007041    | 0.80                                             |
|          |       |                                              | hCT001161        | HMGCR         | NM_000859    | 0.84                                             |
|          |       |                                              | hCT001269        | HMGCR         | NM_000859    | 0.86                                             |
|          |       |                                              | hHA035253        | USP14         | NM_005151    | 0.80                                             |
|          |       |                                              | hCT001293        | HMGCR         | NM_000859    | 0.85                                             |
|          |       |                                              | hCT001473        | RB1           | NM_000321    | 0.81                                             |
|          |       |                                              | hHA037869        | USP46         | NM_001134223 | 0.82                                             |
|          |       |                                              | hHA033273        | LYPLA1        | NM_006330    | 0.80                                             |
|          |       |                                              | hHA038265        | RBM12         | NM_006047    | 0.89                                             |
|          |       |                                              | hHA039993        | NKHD1-EIF4EBP | NM_020690    | 0.82                                             |
|          |       |                                              | hCT001341        | HMGCR         | NM_000859    | 0.85                                             |
|          |       |                                              | hHA035601        | ZMYM6         | NM_007167    | 0.80                                             |
|          |       |                                              | hHA036561        | UBQLN1        | NM_013438    | 0.80                                             |
|          |       |                                              | hCT001268        | HMGCR         | NM_000859    | 0.85                                             |
|          |       |                                              | hCT001448        | RB1           | NM_000321    | 0.80                                             |
|          |       |                                              | hHA037652        | SPAG9         | AK024068     | 0.81                                             |
|          |       |                                              | hCT001196        | RB1           | NM_000321    | 0.83                                             |
|          |       |                                              | hHA037964        | ATF2          | NM_001880    | 0.82                                             |
|          |       |                                              | hCT001316        | HMGCR         | NM_000859    | 0.90                                             |
|          |       |                                              | hCT001496        | RB1           | NM_000321    | 0.84                                             |
|          |       |                                              | hHA037508        | CSDE1         | NM_001130523 | 0.84                                             |
|          |       |                                              | hHA037592        | FAM178A       | NM_018121    | 0.83                                             |

Table S4 Coexpression

| Gene Set | Probe     | Pre-natally enriched Disease-associated Gene | Correlated Probe | Gene             | Accession    | Pearson's Correlation Coefficient (RIN Adjusted) |
|----------|-----------|----------------------------------------------|------------------|------------------|--------------|--------------------------------------------------|
|          |           |                                              | hCT001520        | RB1              | NM_000321    | 0.84                                             |
|          |           |                                              | hHA034567        | HECTD2           | NM_182765    | 0.85                                             |
|          |           |                                              | hHA038215        | ABI2             | NM_005759    | 0.83                                             |
|          |           |                                              | hHC005983        | ATXN3            | NM_004993    | 0.87                                             |
|          |           |                                              | hHA035851        | FAM126B          | NM_173822    | 0.81                                             |
|          |           |                                              | hHA035947        | SPTLC1           | NM_006415    | 0.85                                             |
|          |           |                                              | hHA039691        | SLC30A5          | NM_022902    | 0.86                                             |
|          |           |                                              | hHC007255        | ZBTB26           | NM_020924    | 0.86                                             |
|          |           |                                              | hHC010327        | PHF6             | NM_032458    | 0.83                                             |
|          |           |                                              | hHA036547        | TRO              | NM_001039705 | 0.82                                             |
|          |           |                                              | hHA038142        | C9orf72          | NM_018325    | 0.81                                             |
|          |           |                                              | hHR007254        | ZBTB26           | NM_020924    | 0.85                                             |
|          |           |                                              | hHC011478        | NANP             | AK055472     | 0.80                                             |
|          |           |                                              | hHA036834        | SLC9A6           | NM_001042537 | 0.84                                             |
|          |           |                                              | hHA034842        | ZMYM6            | NM_007167    | 0.83                                             |
|          |           |                                              | hHR014321        | CK818803         | CK818803     | 0.83                                             |
|          |           |                                              | hHC025829        | ZKSCAN1          | NM_003439    | 0.90                                             |
|          |           |                                              | hHA035177        | CCNT2            | NM_058241    | 0.89                                             |
|          |           |                                              | hHC010037        | PB41L4A),(C5orf2 | BI086626     | 0.81                                             |
|          |           |                                              | hHC024053        | CSNK1G3          | NM_001044723 | 0.87                                             |
|          |           |                                              | hHA034241        | PTPN12           | NM_002835    | 0.81                                             |
|          |           |                                              | hHA035297        | HECTD2           | NM_182765    | 0.89                                             |
|          |           |                                              | hHA038453        | ANKS1B           | NM_152788    | 0.82                                             |
|          |           |                                              | hCT001156        | OCRL             | NM_000276    | 0.80                                             |
|          |           |                                              | hHA038656        | PHC2             | NM_198040    | 0.82                                             |
|          |           |                                              | hCT000856        | LRP1             | NM_002332    | 0.80                                             |
|          |           |                                              | hHC020643        | TRIT1            | NM_017646    | 0.80                                             |
|          |           |                                              | hCT001287        | OCRL             | AK226116     | 0.83                                             |
|          |           |                                              | hHA040743        | SLC30A5          | NM_022902    | 0.80                                             |
|          |           |                                              | hCT001262        | OCRL             | NM_000276    | 0.81                                             |
|          |           |                                              | hHA036770        | PPP2R5C          | NM_002719    | 0.83                                             |
|          |           |                                              | hCT001286        | OCRL             | NM_001587    | 0.80                                             |
|          |           |                                              | hHA039302        | C9orf72          | NM_018325    | 0.83                                             |
|          |           |                                              | hHC008377        | GOPC             | NM_020399    | 0.84                                             |
|          |           |                                              | hHC014521        | ZNF664           | NM_152437    | 0.81                                             |
|          |           |                                              | hHA037573        | CSE1L            | NM_001316    | 0.84                                             |
|          |           |                                              | hHC017161        | ZNF226           | NM_001032372 | 0.82                                             |
| ASD DB   | hHA035450 | SOX5                                         | hHR003716        | MIB1             | NM_020774    | 0.80                                             |
|          |           |                                              | hHA037290        | SYNE2            | NM_182914    | 0.84                                             |
|          |           |                                              | hHA036869        | SYNE2            | NM_182914    | 0.83                                             |
|          |           |                                              | hHA034421        | SYNE2            | NM_182914    | 0.81                                             |
|          |           |                                              | hHA034061        | SYNE2            | NM_182914    | 0.84                                             |
|          |           |                                              | hHA035103        | SYNE2            | NM_182914    | 0.85                                             |
|          |           |                                              | hHA035450        | SOX5             | NM_006940    | 1.00                                             |

Table S4 Coexpression

| Gene Set | Probe     | Pre-natally enriched Disease-associated Gene | Correlated Probe | Gene     | Accession    | Pearson's Correlation Coefficient (RIN Adjusted) |
|----------|-----------|----------------------------------------------|------------------|----------|--------------|--------------------------------------------------|
| ASD DB   | hHC008055 | ST7                                          | hHA036774        | ST7      | NM_018412    | 0.80                                             |
|          |           |                                              | hHC006702        | DB549992 | DB549992     | 0.87                                             |
|          |           |                                              | hHC003245        | AKAP9    | NM_005751    | 0.80                                             |
|          |           |                                              | hHC008055        | ST7      | NM_018412    | 1.00                                             |
|          |           |                                              | hHC001717        | ELOVL5   | NM_021814    | 0.86                                             |
| ASD DB   | hHA033920 | SUV420H1                                     | hHA033036        | DHX9     | NM_001357    | 0.81                                             |
|          |           |                                              | hCT001284        | OCRL     | NM_000276    | 0.87                                             |
|          |           |                                              | hHC007559        | MFAP3    | NR_024152    | 0.80                                             |
|          |           |                                              | hHC004341        | MAP2K6   | U39657       | 0.81                                             |
|          |           |                                              | hHA033237        | DHX9     | NM_001357    | 0.81                                             |
|          |           |                                              | hHC008805        | BMI1     | NM_005180    | 0.81                                             |
|          |           |                                              | hCT001196        | RB1      | NM_000321    | 0.81                                             |
|          |           |                                              | hHA033920        | SUV420H1 | NM_017635    | 1.00                                             |
|          |           |                                              | hHA037592        | FAM178A  | NM_018121    | 0.83                                             |
|          |           |                                              | hHC009223        | WDR26    | NM_025160    | 0.83                                             |
|          |           |                                              | hHC016805        | SMEK2    | NM_001122964 | 0.82                                             |
|          |           |                                              | hHC024053        | CSNK1G3  | NM_001044723 | 0.83                                             |
|          |           |                                              | hHA038079        | MACF1    | NM_012090    | 0.81                                             |
|          |           |                                              | hHA037273        | RBM26    | BC111739     | 0.80                                             |
| ASD DB   | hHC014149 | TAF1C                                        | hHC014149        | TAF1C    | NM_005679    | 1.00                                             |
| ASD DB   | hHC005106 | TBR1                                         | hHC005106        | TBR1     | NM_006593    | 1.00                                             |
| ASD DB   | hHC030724 | TLK2                                         | hHC030724        | TLK2     | NM_006852    | 1.00                                             |
| ASD DB   | hHA040599 | TSN                                          | hHA040599        | TSN      | NM_004622    | 1.00                                             |
| ASD DB   | hHC003689 | UBA6                                         | hHC003689        | UBA6     | NM_018227    | 1.00                                             |
| ASD DB   | hHC029382 | UBE2H                                        | hHA032974        | SCAMP1   | NM_004866    | 0.85                                             |
|          |           |                                              | hCT001185        | HMGCR    | NM_000859    | 0.80                                             |
|          |           |                                              | hHA040005        | CSDE1    | NM_001007553 | 0.84                                             |
|          |           |                                              | hHC010196        | MARK3    | NM_001128918 | 0.81                                             |
|          |           |                                              | hHA035144        | MBTPS1   | NM_003791    | 0.82                                             |
|          |           |                                              | hHR026924        | CSNK1A1  | NM_001025105 | 0.79                                             |
|          |           |                                              | hHA033080        | DHX9     | NM_001357    | 0.83                                             |
|          |           |                                              | hHA034279        | XRN2     | NM_012255    | 0.84                                             |
|          |           |                                              | hHA033067        | DHX9     | NM_001357    | 0.81                                             |
|          |           |                                              | hHC006930        | TLL7     | NM_024686    | 0.83                                             |
|          |           |                                              | hHC016038        | ZBTB8    | NM_001040441 | 0.80                                             |
|          |           |                                              | hHC029382        | UBE2H    | NM_003344    | 1.00                                             |
|          |           |                                              | hHA035849        | NRXN1    | NM_001135659 | 0.80                                             |
|          |           |                                              | hHC009268        | SCAMP1   | NM_004866    | 0.82                                             |
|          |           |                                              | hHA033723        | ZNF644   | NM_201269    | 0.83                                             |
|          |           |                                              | hHR027385        | HSP90B1  | NM_003299    | 0.82                                             |
|          |           |                                              | hHA035557        | ANKRD17  | NM_032217    | 0.81                                             |
| ASD DB   | hHA033034 | UBE3A                                        | hHA037464        | CREB1    | NM_134442    | 0.85                                             |
|          |           |                                              | hCT001104        | OCRL     | NM_000276    | 0.83                                             |
|          |           |                                              | hCT001188        | HMGCR    | NM_000859    | 0.86                                             |

Table S4 Coexpression

| Gene Set | Probe | Pre-natally enriched Disease-associated Gene | Correlated Probe | Gene      | Accession    | Pearson's Correlation Coefficient (RIN Adjusted) |
|----------|-------|----------------------------------------------|------------------|-----------|--------------|--------------------------------------------------|
|          |       |                                              | hHA033936        | CSE1L     | NM_001316    | 0.82                                             |
|          |       |                                              | hHA034020        | UBE2J1    | NM_016021    | 0.83                                             |
|          |       |                                              | hHA035472        | UBQLN1    | NM_013438    | 0.82                                             |
|          |       |                                              | hHA039504        | UBE3A     | NM_130839    | 0.83                                             |
|          |       |                                              | hHC013212        | SPAG9     | NM_001130528 | 0.82                                             |
|          |       |                                              | hHA034344        | CSE1L     | NM_001316    | 0.84                                             |
|          |       |                                              | hHA034332        | MBNL1     | NM_021038    | 0.81                                             |
|          |       |                                              | hHC017280        | UBXN7     | NM_015562    | 0.84                                             |
|          |       |                                              | hHA035988        | CNR1      | NM_016083    | 0.85                                             |
|          |       |                                              | hCT001175        | RB1       | NM_000321    | 0.85                                             |
|          |       |                                              | hCT001163        | HMGCR     | NM_000859    | 0.92                                             |
|          |       |                                              | hCT001451        | RB1       | NM_000321    | 0.85                                             |
|          |       |                                              | hHC005015        | SP4       | NM_003112    | 0.84                                             |
|          |       |                                              | hHR007991        | PPP1R9A   | NM_017650    | 0.82                                             |
|          |       |                                              | hHC009995        | CCNH      | AK094534     | 0.88                                             |
|          |       |                                              | hHC024011        | LRRC49    | NM_017691    | 0.81                                             |
|          |       |                                              | hHC026327        | GMFB      | NM_004124    | 0.85                                             |
|          |       |                                              | hHA035927        | USP15     | AF153604     | 0.85                                             |
|          |       |                                              | hHA036779        | KIF1B     | NM_015074    | 0.81                                             |
|          |       |                                              | hCT001187        | HMGCR     | NM_000859    | 0.90                                             |
|          |       |                                              | hCT001295        | HMGCR     | NM_000859    | 0.82                                             |
|          |       |                                              | hCT001475        | RB1       | NM_000321    | 0.80                                             |
|          |       |                                              | hHR003683        | FNBP1L    | AK000282     | 0.84                                             |
|          |       |                                              | hHR008195        | LOC221710 | NM_001135575 | 0.88                                             |
|          |       |                                              | hHC014351        | TMED7     | NM_181836    | 0.83                                             |
|          |       |                                              | hHA035279        | PPP1CB    | NM_002709    | 0.83                                             |
|          |       |                                              | hHA036431        | RNF138    | NM_016271    | 0.84                                             |
|          |       |                                              | hCT001211        | HMGCR     | NM_000859    | 0.91                                             |
|          |       |                                              | hCT001499        | RB1       | NM_000321    | 0.81                                             |
|          |       |                                              | hHA033083        | GTF2H1    | NM_001142307 | 0.87                                             |
|          |       |                                              | hHA037511        | NEDD9     | NM_001142393 | 0.82                                             |
|          |       |                                              | hHA034739        | INPP5F    | NM_014937    | 0.84                                             |
|          |       |                                              | hHA037811        | DPYSL2    | NM_001386    | 0.83                                             |
|          |       |                                              | hCT001174        | RB1       | NM_000321    | 0.80                                             |
|          |       |                                              | hCT001162        | HMGCR     | NM_000859    | 0.88                                             |
|          |       |                                              | hCT001270        | HMGCR     | NM_000859    | 0.87                                             |
|          |       |                                              | hHR017590        | SNX12     | NM_013346    | 0.80                                             |
|          |       |                                              | hHR018634        | SRP72     | NM_006947    | 0.85                                             |
|          |       |                                              | hHA033034        | UBE3A     | NM_130839    | 1.00                                             |
|          |       |                                              | hHA033322        | GNAQ      | NM_002072    | 0.81                                             |
|          |       |                                              | hHA037078        | SETD3     | NM_032233    | 0.80                                             |
|          |       |                                              | hHA038794        | G3BP2     | NM_203505    | 0.83                                             |
|          |       |                                              | hCT001198        | RB1       | NM_000321    | 0.83                                             |
|          |       |                                              | hCT001186        | HMGCR     | NM_000859    | 0.91                                             |

Table S4 Coexpression

| Gene Set | Probe | Pre-natally enriched Disease-associated Gene | Correlated Probe | Gene           | Accession       | Pearson's Correlation Coefficient (RIN Adjusted) |
|----------|-------|----------------------------------------------|------------------|----------------|-----------------|--------------------------------------------------|
|          |       |                                              | hCT001294        | HMGCR          | NM_000859       | 0.93                                             |
|          |       |                                              | hHC020782        | SNX12          | NM_013346       | 0.81                                             |
|          |       |                                              | hCT001210        | HMGCR          | NM_000859       | 0.94                                             |
|          |       |                                              | hCT001318        | HMGCR          | NM_000859       | 0.92                                             |
|          |       |                                              | hHA035578        | ZMYND11        | NM_006624       | 0.83                                             |
|          |       |                                              | hCT001234        | HMGCR          | NM_000859       | 0.85                                             |
|          |       |                                              | hCT001342        | HMGCR          | NM_000859       | 0.80                                             |
|          |       |                                              | hCT001161        | HMGCR          | NM_000859       | 0.94                                             |
|          |       |                                              | hCT001269        | HMGCR          | NM_000859       | 0.95                                             |
|          |       |                                              | hHC004341        | MAP2K6         | U39657          | 0.85                                             |
|          |       |                                              | hHR027573        | ENST0000033211 | ENST00000332119 | 0.81                                             |
|          |       |                                              | hHA035253        | USP14          | NM_005151       | 0.83                                             |
|          |       |                                              | hHA035337        | SPAG9          | NM_001130528    | 0.85                                             |
|          |       |                                              | hHA038613        | WDR17          | NM_170710       | 0.83                                             |
|          |       |                                              | hHA040713        | UHRF2          | NM_152896       | 0.81                                             |
|          |       |                                              | hCT001197        | RB1            | NM_000321       | 0.83                                             |
|          |       |                                              | hCT001293        | HMGCR          | NM_000859       | 0.88                                             |
|          |       |                                              | hCT001281        | OCRL           | NM_000276       | 0.83                                             |
|          |       |                                              | hCT001473        | RB1            | NM_000321       | 0.82                                             |
|          |       |                                              | hHA037869        | USP46          | NM_001134223    | 0.84                                             |
|          |       |                                              | hCT001317        | HMGCR          | NM_000859       | 0.84                                             |
|          |       |                                              | hHC016293        | ZEB2           | NM_014795       | 0.84                                             |
|          |       |                                              | hHA033381        | NCOA4          | NM_005437       | 0.87                                             |
|          |       |                                              | hHA035193        | INPP5F         | NM_014937       | 0.83                                             |
|          |       |                                              | hCT001245        | RB1            | M15400          | 0.81                                             |
|          |       |                                              | hCT001341        | HMGCR          | NM_000859       | 0.90                                             |
|          |       |                                              | hHA035601        | ZMYM6          | NM_007167       | 0.83                                             |
|          |       |                                              | hCT001268        | HMGCR          | NM_000859       | 0.94                                             |
|          |       |                                              | hCT001448        | RB1            | NM_000321       | 0.87                                             |
|          |       |                                              | hHR025556        | API5           | NR_024625       | 0.80                                             |
|          |       |                                              | hHA037652        | SPAG9          | AK024068        | 0.84                                             |
|          |       |                                              | hHE041108        | (CSNK1A1),     | CN267058        | 0.84                                             |
|          |       |                                              | hCT001196        | RB1            | NM_000321       | 0.84                                             |
|          |       |                                              | hHA037964        | ATF2           | NM_001880       | 0.84                                             |
|          |       |                                              | hCT001316        | HMGCR          | NM_000859       | 0.92                                             |
|          |       |                                              | hHC015992        | CUL2           | NM_003591       | 0.80                                             |
|          |       |                                              | hCT001340        | HMGCR          | NM_000859       | 0.88                                             |
|          |       |                                              | hCT001520        | RB1            | NM_000321       | 0.85                                             |
|          |       |                                              | hHC002588        | NCOA2          | NM_006540       | 0.81                                             |
|          |       |                                              | hCT001171        | RB1            | NM_000321       | 0.80                                             |
|          |       |                                              | hHC009223        | WDR26          | NM_025160       | 0.84                                             |
|          |       |                                              | hHA034567        | HECTD2         | NM_182765       | 0.85                                             |
|          |       |                                              | hHC005983        | ATXN3          | NM_004993       | 0.85                                             |
|          |       |                                              | hHA039691        | SLC30A5        | NM_022902       | 0.88                                             |

Table S4 Coexpression

| Gene Set | Probe     | Pre-natally enriched Disease-associated Gene | Correlated Probe | Gene     | Accession    | Pearson's Correlation Coefficient (RIN Adjusted) |
|----------|-----------|----------------------------------------------|------------------|----------|--------------|--------------------------------------------------|
|          |           |                                              | hHC009943        | CACNA2D1 | NM_000722    | 0.83                                             |
|          |           |                                              | hHC010327        | PHF6     | NM_032458    | 0.88                                             |
|          |           |                                              | hHA034363        | YME1L1   | NM_139312    | 0.81                                             |
|          |           |                                              | hHC020934        | CHUK     | NM_001278    | 0.81                                             |
|          |           |                                              | hHA038142        | C9orf72  | NM_018325    | 0.84                                             |
|          |           |                                              | hHR007254        | ZBTB26   | NM_020924    | 0.82                                             |
|          |           |                                              | hHA033942        | MBOAT2   | NM_138799    | 0.83                                             |
|          |           |                                              | hHA035670        | C9orf72  | NM_018325    | 0.84                                             |
|          |           |                                              | hHA033870        | SLC30A5  | NM_022902    | 0.85                                             |
|          |           |                                              | hHA035514        | SNX14    | NM_153816    | 0.83                                             |
|          |           |                                              | hHR014321        | CK818803 | CK818803     | 0.85                                             |
|          |           |                                              | hHC025829        | ZKSCAN1  | NM_003439    | 0.82                                             |
|          |           |                                              | hHC021053        | MAPK8    | NM_139046    | 0.81                                             |
|          |           |                                              | hHC024053        | CSNK1G3  | NM_001044723 | 0.85                                             |
|          |           |                                              | hHC027940        | ZNF770   | NM_014106    | 0.83                                             |
|          |           |                                              | hHA035440        | MBTPS1   | NM_003791    | 0.82                                             |
|          |           |                                              | hHC014703        | 11-Sep   | NM_018243    | 0.86                                             |
|          |           |                                              | hHA034347        | OSBPL6   | NM_032523    | 0.80                                             |
|          |           |                                              | hHA034443        | MTMR2    | NR_023356    | 0.84                                             |
|          |           |                                              | hCT001262        | OCRL     | NM_000276    | 0.81                                             |
|          |           |                                              | hHA036770        | PPP2R5C  | NM_002719    | 0.80                                             |
|          |           |                                              | hHA035654        | WDR17    | NM_170710    | 0.85                                             |
|          |           |                                              | hHA039302        | C9orf72  | NM_018325    | 0.84                                             |
|          |           |                                              | hCT001334        | OCRL     | NM_000276    | 0.81                                             |
|          |           |                                              | hHA033002        | MATR3    | NM_199189    | 0.85                                             |
|          |           |                                              | hCT001189        | HMGCR    | NM_000859    | 0.83                                             |
|          |           |                                              | hHC007333        | BM312210 | BM312210     | 0.81                                             |
|          |           |                                              | hHC008377        | GOPC     | NM_020399    | 0.83                                             |
|          |           |                                              | hHA036025        | TCF12    | NM_207037    | 0.82                                             |
|          |           |                                              | hHA037573        | CSE1L    | NM_001316    | 0.82                                             |
|          |           |                                              | hCT001213        | HMGCR    | NM_000859    | 0.83                                             |
|          |           |                                              | hHA035677        | INPP5F   | NM_014937    | 0.88                                             |
|          |           |                                              | hCT001237        | HMGCR    | NM_000859    | 0.80                                             |
|          |           |                                              | hCT001333        | OCRL     | NM_000276    | 0.84                                             |
| ASD DB   | hHC001627 |                                              | hHR001980        | USP38    | NM_032557    | 0.82                                             |
|          |           |                                              | hHC001627        | UBR5     | CD511402     | 1.00                                             |
| ASD DB   | hHC015490 | VASH1                                        | hHC015490        | VASH1    | NM_014909    | 1.00                                             |
| ASD DB   | hHC005732 | XPO1                                         | hHC005732        | XPO1     | NM_003400    | 1.00                                             |
| ASD DB   | hHC002724 | YEATS2                                       | hHC002724        | YEATS2   | NM_018023    | 1.00                                             |
| ASD DB   | hHC004011 | YTHDC2                                       | hHC004011        | YTHDC2   | NM_022828    | 1.00                                             |
| ASD DB   | hHC019788 | ZNF18                                        | hHC019788        | ZNF18    | NM_144680    | 1.00                                             |
| ASD DB   | hHR019994 | ZSWIM5                                       | hHR019994        | ZSWIM5   | NM_020883    | 1.00                                             |
| BPAD     | hHA034365 | ANK3                                         | hHA034403        | NRXN1    | NM_001135659 | 0.85                                             |
|          |           |                                              | hHA036742        | NRXN1    | NM_001135659 | 0.80                                             |

Table S4 Coexpression

| Gene Set | Probe     | Pre-natally enriched Disease-associated Gene | Correlated Probe | Gene     | Accession    | Pearson's Correlation Coefficient (RIN Adjusted) |
|----------|-----------|----------------------------------------------|------------------|----------|--------------|--------------------------------------------------|
|          |           |                                              | hHC002037        | APC      | NM_001127511 | 0.84                                             |
|          |           |                                              | hHA035661        | NRXN1    | NM_001135659 | 0.87                                             |
|          |           |                                              | hHA034365        | ANK3     | NM_020987    | 1.00                                             |
|          |           |                                              | hHC014372        | PCDHA1   | NM_018900    | 0.81                                             |
|          |           |                                              | hHC009631        | CDKL1    | NM_004196    | 0.81                                             |
|          |           |                                              | hHC014371        | PCDHA1   | NM_018900    | 0.83                                             |
|          |           |                                              | hHA035369        | NRXN1    | NM_001135659 | 0.81                                             |
| BPAD     | hHC022165 | BRMS1                                        | hHC022165        | BRMS1    | NM_015399    | 1.00                                             |
| BPAD     | hHR025792 | DDX23                                        | hHC011368        | ZNF3     | NM_032924    | 0.91                                             |
|          |           |                                              | hHC020296        | MORN4    | NM_178832    | 0.86                                             |
|          |           |                                              | hHA038248        | HERPUD2  | NM_022373    | 0.81                                             |
|          |           |                                              | hHR025792        | DDX23    | NM_004818    | 1.00                                             |
| BPAD     | hHR013854 |                                              | hHC016530        | SMARCB1  | NM_003073    | 0.83                                             |
|          |           |                                              | hHR013854        | DPP3     | NM_130443    | 1.00                                             |
| BPAD     | hHC008371 | FSTL5                                        | hHC008371        | FSTL5    | NM_020116    | 1.00                                             |
| BPAD     | hHC011066 | FUBP1                                        | hHC011066        | FUBP1    | AB209366     | 1.00                                             |
| BPAD     | hHC017657 | GLT8D1                                       | hHA037103        | ZNF3     | NM_032924    | 0.80                                             |
|          |           |                                              | hHA035253        | USP14    | NM_005151    | 0.80                                             |
|          |           |                                              | hHA039140        | SNX2     | NM_003100    | 0.88                                             |
|          |           |                                              | hHA039847        | CNOT1    | NM_016284    | 0.81                                             |
|          |           |                                              | hHA035947        | SPTLC1   | NM_006415    | 0.87                                             |
|          |           |                                              | hHC031063        | SMU1     | NM_018225    | 0.78                                             |
|          |           |                                              | hHA036547        | TRO      | NM_001039705 | 0.83                                             |
|          |           |                                              | hHA034363        | YME1L1   | NM_139312    | 0.85                                             |
|          |           |                                              | hHA037435        | GART     | NM_001136005 | 0.81                                             |
|          |           |                                              | hHA037673        | GLT8D1   | NM_001010983 | 0.79                                             |
|          |           |                                              | hHC017657        | GLT8D1   | NM_001010983 | 1.00                                             |
|          |           |                                              | hCT001156        | OCRL     | NM_000276    | 0.81                                             |
|          |           |                                              | hCT001287        | OCRL     | AK226116     | 0.82                                             |
|          |           |                                              | hHA032833        | RBM5     | NM_005778    | 0.79                                             |
|          |           |                                              | hHC017161        | ZNF226   | NM_001032372 | 0.84                                             |
| BPAD     | hHC012128 | LMAN2L                                       | hHC012128        | LMAN2L   | NM_001142292 | 1.00                                             |
| BPAD     | hHC022245 | LMBR1L                                       | hHC022245        | LMBR1L   | NM_018113    | 1.00                                             |
| BPAD     | hHC009312 | LYG1                                         | hHC009312        | LYG1     | NM_174898    | 1.00                                             |
| BPAD     | hHC014516 | MITD1                                        | hHC014516        | MITD1    | NM_138798    | 1.00                                             |
| BPAD     | hHE041849 | MLL2                                         | hHE041849        | MLL2     | NM_003482    | 1.00                                             |
| BPAD     | hHA035129 | MRPL11                                       | hHA035129        | MRPL11   | NM_170739    | 1.00                                             |
| BPAD     | hHC008161 | NCAN                                         | hHC008161        | NCAN     | NM_004386    | 1.00                                             |
| BPAD     | hHC024330 | NT5DC2                                       | hHC024330        | NT5DC2   | NM_022908    | 1.00                                             |
| BPAD     | hHC024103 | NUDT1                                        | hHC014134        | BCL2L12  | NM_138639    | 0.82                                             |
|          |           |                                              | hHR019400        | RNASEH2C | NM_032193    | 0.86                                             |
|          |           |                                              | hHC027620        | RNASEH2C | NM_032193    | 0.84                                             |
|          |           |                                              | hHC024103        | NUDT1    | NM_198949    | 0.81                                             |
|          |           |                                              | hHC020863        | PXMP2    | NM_018663    | 1.00                                             |

Table S4 Coexpression

| Gene Set | Probe     | Pre-natally enriched Disease-associated Gene | Correlated Probe | Gene     | Accession    | Pearson's Correlation Coefficient (RIN Adjusted) |
|----------|-----------|----------------------------------------------|------------------|----------|--------------|--------------------------------------------------|
|          |           |                                              | hHC026275        | DCI      | NM_001919    | 0.83                                             |
|          |           |                                              | hHC021775        | CHCHD5   | NM_032309    | 0.84                                             |
|          |           |                                              | hHC014490        | SSSCA1   | NM_006396    | 0.82                                             |
|          |           |                                              | hHR021317        | CYBA     | NM_000101    | 0.80                                             |
|          |           |                                              | hHC019133        | FKBPL    | NM_022110    | 0.85                                             |
|          |           |                                              | hHC023741        | SHFM1    | NM_006304    | 0.83                                             |
|          |           |                                              | hHC022169        | C1orf144 | NM_001114600 | 0.85                                             |
|          |           |                                              | hHC032284        | DTYMK    | NM_012145    | 0.85                                             |
|          |           |                                              | hHC020032        | REEP4    | NM_025232    | 0.80                                             |
|          |           |                                              | hHC011224        | ZNRD1    | NM_170783    | 0.86                                             |
|          |           |                                              | hHC018782        | DCPS     | NM_014026    | 0.82                                             |
|          |           |                                              | hHC012266        | WDR51A   | NM_015426    | 0.81                                             |
|          |           |                                              | hHC017366        | MTCP1    | NM_014221    | 0.82                                             |
|          |           |                                              | hHA039530        | TRPT1    | NM_001033678 | 0.85                                             |
|          |           |                                              | hHA035545        | CDK4     | NM_000075    | 0.85                                             |
|          |           |                                              | hHC010261        | AS3MT    | NM_020682    | 0.80                                             |
| BPAD     | hHC008608 | ODZ4                                         | hHC008608        | ODZ4     | NM_001098816 | 1.00                                             |
| BPAD     | hHC007983 | PBRM1                                        | hHC007983        | PBRM1    | NM_018313    | 1.00                                             |
| BPAD     | hHC002159 | PTGFR                                        | hHC002159        | PTGFR    | NM_001039585 | 1.00                                             |
| BPAD     | hHC002778 | RBM14                                        | hHC002778        | RBM14    | NM_006328    | 1.00                                             |
| BPAD     | hHA033137 | RBM4                                         | hHA033137        | RBM4     | NM_002896    | 1.00                                             |
| BPAD     | hHC026961 | RBM4B                                        | hHC026961        | RBM4B    | NM_031492    | 1.00                                             |
| BPAD     | hHC014793 | RCE1                                         | hHC014793        | RCE1     | NM_005133    | 1.00                                             |
| BPAD     | hHC004303 | REV1                                         | hHC004580        | MRPS28   | NM_014018    | 0.82                                             |
|          |           |                                              | hHC004303        | REV1     | NM_016316    | 1.00                                             |
|          |           |                                              | hHC027685        | PDCD7    | NM_005707    | 0.80                                             |
| BPAD     | hHR029076 | RPL18                                        | hHR029076        | RPL18    | NM_000979    | 1.00                                             |
| BPAD     | hHA033917 | SYNE1                                        | hHA033917        | SYNE1    | NM_133650    | 1.00                                             |
| BPAD     | hHC025916 | TUBA1A                                       | hHC025916        | TUBA1A   | NM_006009    | 1.00                                             |
| BPAD     | hHA033914 | USP33                                        | hHA033914        | USP33    | NM_201626    | 1.00                                             |
| BPAD     | hHC025830 | WDR82                                        | hHC017134        | NDRG3    | NM_032013    | 0.81                                             |
|          |           |                                              | hHC025830        | WDR82    | NM_025222    | 1.00                                             |
|          |           |                                              | hHA040084        | PCDHA1   | NM_018900    | 0.81                                             |
| BPAD     | hHC003709 | ZMIZ1                                        | hHC003709        | ZMIZ1    | NM_020338    | 1.00                                             |
| ID       | hHC004157 | DCX                                          | hHC004157        | DCX      | NM_000555    | 1.00                                             |
|          |           |                                              | hHR028947        | ZNF91    | NM_003430    | 0.83                                             |
| ID       | hHC007076 | FOXP1                                        | hHC007076        | FOXP1    | NM_005249    | 1.00                                             |
| ID       | hHC007660 | ZNF711                                       | hHA038080        | MACF1    | NM_012090    | 0.82                                             |
|          |           |                                              | hHC007660        | ZNF711   | NM_021998    | 1.00                                             |
|          |           |                                              | hHC009196        | TMEM135  | NM_022918    | 0.87                                             |
|          |           |                                              | hHC015340        | GPR107   | NM_001136557 | 0.82                                             |
| ID       | hHC005898 | AFF2                                         | hHC004824        | TAPT1    | NM_153365    | 0.81                                             |
|          |           |                                              | hHC005100        | CDH10    | NM_006727    | 0.82                                             |
|          |           |                                              | hHC008844        | PPP1R14C | NM_030949    | 0.83                                             |



Table S4 Coexpression

| Gene Set | Probe | Pre-natally enriched Disease-associated Gene | Correlated Probe | Gene      | Accession    | Pearson's Correlation Coefficient (RIN Adjusted) |
|----------|-------|----------------------------------------------|------------------|-----------|--------------|--------------------------------------------------|
|          |       |                                              | hHC001764        | SATB2     | NM_015265    | 0.82                                             |
|          |       |                                              | hHC018263        | LOC150568 | AK126958     | 0.82                                             |
|          |       |                                              | hHC012083        | KIAA1377  | NM_020802    | 0.81                                             |
|          |       |                                              | hHC008950        | CCBE1     | NM_133459    | 0.85                                             |
|          |       |                                              | hHC003310        | ETV6      | NM_001987    | 0.82                                             |
|          |       |                                              | hHC004558        | SLITRK5   | NM_015567    | 0.80                                             |
|          |       |                                              | hHA033934        | PCDH10    | NM_032961    | 0.91                                             |
|          |       |                                              | hHR002770        | THSD7B    | NM_001080427 | 0.82                                             |
|          |       |                                              | hHC009694        | FBXO27    | NM_178820    | 0.80                                             |
|          |       |                                              | hHC009741        | FGF9      | NM_002010    | 0.82                                             |
|          |       |                                              | hHC016833        | SRD5A1    | NM_001047    | 0.84                                             |
|          |       |                                              | hHC013509        | RSPO3     | NM_032784    | 0.84                                             |
|          |       |                                              | hHC004689        | NECAB1    | NM_022351    | 0.84                                             |
|          |       |                                              | hHC004797        | C13orf31  | NM_001128303 | 0.85                                             |
|          |       |                                              | hHC018609        | STK32B    | NM_018401    | 0.83                                             |
|          |       |                                              | hHC002996        | SEMA3E    | NM_012431    | 0.84                                             |
|          |       |                                              | hHC005000        | KLHL14    | NM_020805    | 0.81                                             |
|          |       |                                              | hHC007220        | ELOVL2    | NM_017770    | 0.80                                             |
|          |       |                                              | hHA035912        | GRM7      | BC136458     | 0.90                                             |
|          |       |                                              | hHC003116        | SHC4      | NM_203349    | 0.86                                             |
|          |       |                                              | hHC008960        | NKAIN2    | NM_001040214 | 0.86                                             |
|          |       |                                              | hHC010412        | DB519783  | DB519783     | 0.88                                             |
|          |       |                                              | hHC003704        | PCDHB4    | NM_018938    | 0.84                                             |
|          |       |                                              | hHC004100        | UST       | NM_005715    | 0.82                                             |
|          |       |                                              | hHC018704        | ADCY8     | NM_001115    | 0.83                                             |
|          |       |                                              | hHC005695        | AJAP1     | NM_018836    | 0.81                                             |
|          |       |                                              | hHC007231        | PRKAB2    | NM_005399    | 0.81                                             |
|          |       |                                              | hHC018655        | CXXC4     | NM_025212    | 0.88                                             |
|          |       |                                              | hHC008995        | RIMS1     | BC036608     | 0.84                                             |
|          |       |                                              | hHC009655        | HDAC9     | NM_178423    | 0.89                                             |
|          |       |                                              | hHC002299        | AKAP7     | NM_016377    | 0.87                                             |
|          |       |                                              | hHC005898        | AFF2      | NM_002025    |                                                  |
|          |       |                                              | hHC007530        | KCNK2     | NM_001017424 | 0.82                                             |
|          |       |                                              | hHC024318        | DOK4      | NM_018110    | 0.85                                             |
|          |       |                                              | hHA033834        | HDAC9     | NM_014707    | 0.81                                             |
|          |       |                                              | hHC007074        | MRAS      | NM_012219    | 0.80                                             |
|          |       |                                              | hHR002609        | LOC150568 | NR_015399    | 0.86                                             |
|          |       |                                              | hHC004901        | CHSY3     | NM_175856    | 0.84                                             |
|          |       |                                              | hHA033893        | KLHL4     | NM_019117    | 0.80                                             |
|          |       |                                              | hHC004361        | LRRC4C    | NM_020929    | 0.82                                             |
|          |       |                                              | hHR028841        | USP6      | NM_004505    | 0.83                                             |
|          |       |                                              | hHR005537        | LPHN3     | NM_015236    | 0.83                                             |
|          |       |                                              | hHR008897        | PLCH2     | NM_014638    | 0.85                                             |
|          |       |                                              | hHE040949        | EY892390  | EY892390     | 0.87                                             |

Table S4 Coexpression

| Gene Set | Probe     | Pre-natally enriched Disease-associated Gene | Correlated Probe | Gene      | Accession    | Pearson's Correlation Coefficient (RIN Adjusted) |
|----------|-----------|----------------------------------------------|------------------|-----------|--------------|--------------------------------------------------|
|          |           |                                              | hHC001625        | SCN3A     | NM_006922    | 0.80                                             |
|          |           |                                              | hHA033869        | NEBL      | NM_006393    | 0.82                                             |
|          |           |                                              | hHC008260        | GRM7      | NM_181874    | 0.88                                             |
|          |           |                                              | hHC002620        | EPHA3     | NM_005233    | 0.80                                             |
|          |           |                                              | hHC004792        | PTCHD1    | NM_173495    | 0.81                                             |
|          |           |                                              | hHC030459        | LOC162632 | NR_003190    | 0.83                                             |
|          |           |                                              | hHC001971        | GREM2     | NM_022469    | 0.83                                             |
|          |           |                                              | hHC003711        | ADAMTSL3  | NM_207517    | 0.85                                             |
|          |           |                                              | hHC004671        | PCDH10    | NM_032961    | 0.88                                             |
|          |           |                                              | hHC004959        | CPVL      | NM_019029    | 0.84                                             |
|          |           |                                              | hHC006519        | CXXC4     | AK127778     | 0.87                                             |
|          |           |                                              | hHC019179        | RSPO3     | NM_032784    | 0.80                                             |
|          |           |                                              | hHR011906        | RIMBP2    | NM_015347    | 0.82                                             |
|          |           |                                              | hHC014222        | C3orf59   | NM_178496    | 0.88                                             |
|          |           |                                              | hHC009926        | SH3GL3    | NM_003027    | 0.84                                             |
|          |           |                                              | hHR001898        | KIAA1239  | NM_001144990 | 0.86                                             |
|          |           |                                              | hHC002666        | ITPR1     | NM_001099952 | 0.85                                             |
|          |           |                                              | hHC005654        | NAP1L2    | NM_021963    | 0.80                                             |
|          |           |                                              | hHC002797        | CDH11     | NM_001797    | 0.86                                             |
|          |           |                                              | hHC004537        | LRRC8B    | NM_015350    | 0.85                                             |
|          |           |                                              | hHC009277        | LPPR4     | NM_014839    | 0.81                                             |
|          |           |                                              | hHE040789        | SCN9A     | NM_002977    | 0.80                                             |
| ID       | hHA033656 | BCOR                                         | hHA033656        | BCOR      | AB046795     | 1.00                                             |
| ID       | hHR002515 | MID1                                         | hHR013860        | PAICS     | NM_006452    | 0.81                                             |
|          |           |                                              | hHA034320        | LRRC1     | NM_018214    | 0.80                                             |
|          |           |                                              | hHC004680        | RFX4      | NM_213594    | 0.81                                             |
|          |           |                                              | hHC009468        | MCM3      | NM_002388    | 0.84                                             |
|          |           |                                              | hHC027720        | YAP1      | NM_001130145 | 0.85                                             |
|          |           |                                              | hHR001920        | SOX21     | NM_007084    | 0.80                                             |
|          |           |                                              | hHC018731        | ABHD3     | NM_138340    | 0.84                                             |
|          |           |                                              | hHC028715        | LAPTM4B   | NM_018407    | 0.80                                             |
|          |           |                                              | hHC024419        | RFXANK    | NM_003721    | 0.81                                             |
|          |           |                                              | hHR031067        | COL4A5    | NM_033380    | 0.82                                             |
|          |           |                                              | hHC007295        | DHX40     | NM_024612    | 0.80                                             |
|          |           |                                              | hHC030274        | GNG5      | NM_005274    | 0.80                                             |
|          |           |                                              | hHA036094        | BCAN      | NM_198427    | 0.87                                             |
|          |           |                                              | hHC003297        | DACH1     | NM_080759    | 0.86                                             |
|          |           |                                              | hHC007569        | NAB1      | NM_005966    | 0.86                                             |
|          |           |                                              | hHC009021        | LRIG1     | NM_015541    | 0.84                                             |
|          |           |                                              | hHR002515        | MID1      | NM_000381    | 1.00                                             |
|          |           |                                              | hHC003499        | LIPG      | NM_006033    | 0.82                                             |
|          |           |                                              | hHR006559        | CPNE3     | NM_003909    | 0.80                                             |
|          |           |                                              | hHC024931        | TJAP1     | NM_080604    | 0.85                                             |
|          |           |                                              | hHC015727        | TLK1      | NM_012290    | 0.83                                             |

Table S4 Coexpression

| Gene Set | Probe     | Pre-natally enriched Disease-associated Gene | Correlated Probe | Gene      | Accession    | Pearson's Correlation Coefficient (RIN Adjusted) |
|----------|-----------|----------------------------------------------|------------------|-----------|--------------|--------------------------------------------------|
|          |           |                                              | hHC027439        | ODC1      | NM_002539    | 0.81                                             |
|          |           |                                              | hHC016518        | DNAJC1    | NM_022365    | 0.83                                             |
|          |           |                                              | hHC006582        | CREB5     | NM_182898    | 0.86                                             |
|          |           |                                              | hHC006690        | GPC4      | NM_001448    | 0.89                                             |
|          |           |                                              | hHC002081        | MPDZ      | NM_003829    | 0.80                                             |
|          |           |                                              | hHC004289        | NOTCH2    | NM_024408    | 0.84                                             |
|          |           |                                              | hHR006017        | ANKHD1    | NM_017747    | 0.81                                             |
|          |           |                                              | hHC008801        | SFRP1     | NM_003012    | 0.81                                             |
|          |           |                                              | hHR004084        | QKI       | NM_206855    | 0.80                                             |
|          |           |                                              | hHC003267        | COL9A1    | NM_001851    | 0.81                                             |
|          |           |                                              | hHR002103        | LOC145474 | AK023718     | 0.82                                             |
|          |           |                                              | hHR010263        | HEG1      | NM_020733    | 0.82                                             |
|          |           |                                              | hHR003398        | NOTCH1    | NM_017617    | 0.86                                             |
|          |           |                                              | hHC019742        | PLCE1     | NM_016341    | 0.81                                             |
|          |           |                                              | hHC004586        | HES1      | NM_005524    | 0.81                                             |
|          |           |                                              | hHC013189        | TMPRSS5   | NM_030770    | 0.81                                             |
|          |           |                                              | hHC004957        | PLAG1     | NM_002655    | 0.80                                             |
| ID       | hHC019020 | GRIK2                                        | hHC019020        | GRIK2     | NM_175768    | 1.00                                             |
|          |           |                                              | hCT001188        | HMGCR     | NM_000859    | 0.80                                             |
|          |           |                                              | hHA038748        | MACF1     | NM_012090    | 0.82                                             |
|          |           |                                              | hCT001271        | HMGCR     | NM_000859    | 0.84                                             |
|          |           |                                              | hHC029543        | HMGCS1    | NM_001098272 | 0.79                                             |
|          |           |                                              | hHA038079        | MACF1     | NM_012090    | 0.82                                             |
|          |           |                                              | hCT001189        | HMGCR     | NM_000859    | 0.80                                             |
| ID       | hHC015067 | PRSS12                                       | hHC015067        | PRSS12    | NM_003619    | 1.00                                             |
|          |           |                                              | hHC010695        | NRP1      | NM_003873    | 0.80                                             |
| ID       | hHR029739 | ZEB2                                         | hHR029739        | ZEB2      | NM_014795    | 1.00                                             |
| ID       | hHR002782 | CASK                                         | hHR002782        | CASK      | NM_003688    | 1.00                                             |
| ID       | hHR002178 | PHF6                                         | hHR002178        | PHF6      | NM_032458    | 1.00                                             |
| ID       | hHA035283 | NRXN1                                        | hHA035988        | CNR1      | NM_016083    | 0.79                                             |
|          |           |                                              | hHC009943        | CACNA2D1  | NM_000722    | 0.81                                             |
|          |           |                                              | hHC010327        | PHF6      | NM_032458    | 0.79                                             |
|          |           |                                              | hHC014427        | SLC35F5   | NM_025181    | 0.82                                             |
|          |           |                                              | hHA035283        | NRXN1     | NM_001135659 | 1.00                                             |
|          |           |                                              | hCT001189        | HMGCR     | NM_000859    | 0.79                                             |
|          |           |                                              | hHA034405        | USP34     | NM_014709    | 0.85                                             |
|          |           |                                              | hHA036025        | TCF12     | NM_207037    | 0.79                                             |
|          |           |                                              | hHC019261        | ANKRD28   | NM_015199    | 0.80                                             |
|          |           |                                              | hHC029833        | GNAQ      | NM_002072    | 0.80                                             |
| ID       | hHC031675 | ATRX                                         | hCT001188        | HMGCR     | NM_000859    | 0.81                                             |
|          |           |                                              | hCT001271        | HMGCR     | NM_000859    | 0.82                                             |
|          |           |                                              | hHR007991        | PPP1R9A   | NM_017650    | 0.82                                             |
|          |           |                                              | hCT001295        | HMGCR     | NM_000859    | 0.81                                             |
|          |           |                                              | hHC026531        | CDC42EP3  | NM_006449    | 0.81                                             |

Table S4 Coexpression

| Gene Set | Probe     | Pre-natally enriched Disease-associated Gene | Correlated Probe | Gene       | Accession    | Pearson's Correlation Coefficient (RIN Adjusted) |
|----------|-----------|----------------------------------------------|------------------|------------|--------------|--------------------------------------------------|
|          |           |                                              | hHC029543        | HMGCS1     | NM_001098272 | 0.81                                             |
|          |           |                                              | hHA035301        | TTC33      | NM_012382    | 0.78                                             |
|          |           |                                              | hHC031675        | ATRX       | NM_000489    | 1.00                                             |
|          |           |                                              | hHA035670        | C9orf72    | NM_018325    | 0.79                                             |
|          |           |                                              | hHA035514        | SNX14      | NM_153816    | 0.86                                             |
|          |           |                                              | hCT001189        | HMGCR      | NM_000859    | 0.83                                             |
|          |           |                                              | hCT001213        | HMGCR      | NM_000859    | 0.83                                             |
|          |           |                                              | hCT001237        | HMGCR      | NM_000859    | 0.80                                             |
| ID       | hHA035687 | ZC3H14                                       | hHA035687        | ZC3H14     | NM_024824    | 1.00                                             |
|          |           |                                              | hHA035396        | PTPN12     | NM_002835    | 0.82                                             |
|          |           |                                              | hHC009031        | GNB1       | NM_002074    | 0.83                                             |
|          |           |                                              | hHA037387        | RBM25      | AK094697     | 0.83                                             |
|          |           |                                              | hHA033126        | CASC4      | NM_138423    | 0.86                                             |
|          |           |                                              | hHA034947        | METTL6     | NM_152396    | 0.83                                             |
|          |           |                                              | hHC010971        | FBXO34     | NM_017943    | 0.80                                             |
|          |           |                                              | hHC013970        | C9orf126   | NM_173690    | 0.80                                             |
| ID       | hHC010973 | SOBP                                         | hHC006884        | SRGAP1     | NM_020762    | 0.80                                             |
|          |           |                                              | hHC010973        | SOBP       | NM_018013    | 1.00                                             |
|          |           |                                              | hHC025730        | NHSL1      | NM_001144060 | 0.81                                             |
| ID       | hHA034036 | UBE2A                                        | hHA034036        | UBE2A      | NM_181777    | 1.00                                             |
| ID       | hHR004728 | CUL4B                                        | hHR004728        | CUL4B      | NM_003588    | 1.00                                             |
|          |           |                                              | hHC022092        | AASDHPPT   | NM_015423    | 0.81                                             |
|          |           |                                              | hHA034020        | UBE2J1     | NM_016021    | 0.82                                             |
|          |           |                                              | hHR008796        | GUF1       | NM_021927    | 0.84                                             |
|          |           |                                              | hHA032988        | HIF1A      | NM_001530    | 0.80                                             |
|          |           |                                              | hCT001271        | HMGCR      | NM_000859    | 0.83                                             |
|          |           |                                              | hHR007991        | PPP1R9A    | NM_017650    | 0.83                                             |
|          |           |                                              | hHC026327        | GMFB       | NM_004124    | 0.81                                             |
|          |           |                                              | hCT001295        | HMGCR      | NM_000859    | 0.81                                             |
|          |           |                                              | hHC014351        | TMED7      | NM_181836    | 0.80                                             |
|          |           |                                              | hHC006599        | ADAM10     | NM_001110    | 0.83                                             |
|          |           |                                              | hHC007559        | MFAP3      | NR_024152    | 0.80                                             |
|          |           |                                              | hHR030407        | ZNF322A    | NM_024639    | 0.81                                             |
|          |           |                                              | hHA032999        | ARMC8      | NM_015396    | 0.80                                             |
|          |           |                                              | hHA037811        | DPYSL2     | NM_001386    | 0.84                                             |
|          |           |                                              | hCT001270        | HMGCR      | NM_000859    | 0.82                                             |
|          |           |                                              | hHA037774        | KIAA0528   | BC143859     | 0.80                                             |
|          |           |                                              | hHR013798        | TOP1       | NM_003286    | 0.80                                             |
|          |           |                                              | hHC009165        | TMEM30A    | NM_018247    | 0.80                                             |
|          |           |                                              | hHC008805        | BMI1       | NM_005180    | 0.84                                             |
|          |           |                                              | hHE041108        | (CSNK1A1), | CN267058     | 0.81                                             |
|          |           |                                              | hHC009223        | WDR26      | NM_025160    | 0.88                                             |
|          |           |                                              | hHC013157        | SEL1L      | NM_005065    | 0.80                                             |
|          |           |                                              | hHC016805        | SMEK2      | NM_001122964 | 0.82                                             |

Table S4 Coexpression

| Gene Set | Probe     | Pre-natally enriched Disease-associated Gene | Correlated Probe | Gene     | Accession    | Pearson's Correlation Coefficient (RIN Adjusted) |
|----------|-----------|----------------------------------------------|------------------|----------|--------------|--------------------------------------------------|
|          |           |                                              | hHR023273        | TOMM20   | NM_014765    | 0.81                                             |
|          |           |                                              | hHC023439        | BAT2D1   | NM_015172    | 0.80                                             |
|          |           |                                              | hCT001189        | HMGCR    | NM_000859    | 0.85                                             |
|          |           |                                              | hCT001213        | HMGCR    | NM_000859    | 0.82                                             |
|          |           |                                              | hCT001237        | HMGCR    | NM_000859    | 0.80                                             |
| ID       | hHC025870 | UPF3B                                        | hHC025870        | UPF3B    | NM_080632    | 1.00                                             |
| ID       | hHC011183 | BRWD3                                        | hHC011183        | BRWD3    | NM_153252    | 1.00                                             |
|          |           |                                              | hHA034773        | EZH2     | NM_004456    | 0.84                                             |
|          |           |                                              | hHC008765        | NEIL3    | NM_018248    | 0.82                                             |
| ID       | hHC019207 | AP4B1                                        | hHA034020        | UBE2J1   | NM_016021    | 0.80                                             |
|          |           |                                              | hHC030874        | BMPR1A   | NM_004329    | 0.84                                             |
|          |           |                                              | hHC019207        | AP4B1    | NM_006594    | 1.00                                             |
| ID       | hHR008276 | ZNF81                                        | hHC006767        | HPX      | NM_000613    | 0.80                                             |
|          |           |                                              | hHR008276        | ZNF81    | NM_007137    | 1.00                                             |
|          |           |                                              | hHC022100        | ZNF70    | NM_021916    | 0.82                                             |
|          |           |                                              | hHA037064        | CDH23    | NM_022124    | 0.83                                             |
| ID       | hHC024693 |                                              | hHC018672        | PPFIA2   | NM_003625    | 0.80                                             |
|          |           |                                              | hHC024693        | TUSC3    | NM_006765    | 1.00                                             |
| ID       | hHC011816 | RAI1                                         | hHC011816        | RAI1     | NM_030665    | 1.00                                             |
| ID       | hHA035290 | VLDLR                                        | hHA035290        | VLDLR    | NM_003383    | 1.00                                             |
|          |           |                                              | hHC005950        | HTR1A    | NM_000524    | 0.83                                             |
|          |           |                                              | hHR027435        | BM927052 | BM927052     | 0.84                                             |
| ID       | hHA033034 | UBE3A                                        | hHA037464        | CREB1    | NM_134442    | 0.85                                             |
|          |           |                                              | hCT001104        | OCRL     | NM_000276    | 0.83                                             |
|          |           |                                              | hCT001188        | HMGCR    | NM_000859    | 0.86                                             |
|          |           |                                              | hHA033936        | CSE1L    | NM_001316    | 0.82                                             |
|          |           |                                              | hHA034020        | UBE2J1   | NM_016021    | 0.83                                             |
|          |           |                                              | hHA035472        | UBQLN1   | NM_013438    | 0.82                                             |
|          |           |                                              | hHA039504        | UBE3A    | NM_130839    | 0.83                                             |
|          |           |                                              | hHC013212        | SPAG9    | NM_001130528 | 0.82                                             |
|          |           |                                              | hHA034344        | CSE1L    | NM_001316    | 0.84                                             |
|          |           |                                              | hHA034332        | MBNL1    | NM_021038    | 0.81                                             |
|          |           |                                              | hHC017280        | UBXN7    | NM_015562    | 0.84                                             |
|          |           |                                              | hHA035988        | CNR1     | NM_016083    | 0.85                                             |
|          |           |                                              | hCT001175        | RB1      | NM_000321    | 0.85                                             |
|          |           |                                              | hCT001163        | HMGCR    | NM_000859    | 0.92                                             |
|          |           |                                              | hCT001451        | RB1      | NM_000321    | 0.85                                             |
|          |           |                                              | hHC005015        | SP4      | NM_003112    | 0.84                                             |
|          |           |                                              | hHR007991        | PPP1R9A  | NM_017650    | 0.82                                             |
|          |           |                                              | hHC009995        | CCNH     | AK094534     | 0.88                                             |
|          |           |                                              | hHC024011        | LRRC49   | NM_017691    | 0.81                                             |
|          |           |                                              | hHC026327        | GMFB     | NM_004124    | 0.85                                             |
|          |           |                                              | hHA035927        | USP15    | AF153604     | 0.85                                             |
|          |           |                                              | hHA036779        | KIF1B    | NM_015074    | 0.81                                             |

Table S4 Coexpression

| Gene Set | Probe | Pre-natally enriched Disease-associated Gene | Correlated Probe | Gene           | Accession       | Pearson's Correlation Coefficient (RIN Adjusted) |
|----------|-------|----------------------------------------------|------------------|----------------|-----------------|--------------------------------------------------|
|          |       |                                              | hCT001187        | HMGCR          | NM_000859       | 0.90                                             |
|          |       |                                              | hCT001295        | HMGCR          | NM_000859       | 0.82                                             |
|          |       |                                              | hCT001475        | RB1            | NM_000321       | 0.80                                             |
|          |       |                                              | hHR003683        | FNBP1L         | AK000282        | 0.84                                             |
|          |       |                                              | hHR008195        | LOC221710      | NM_001135575    | 0.88                                             |
|          |       |                                              | hHC014351        | TMED7          | NM_181836       | 0.83                                             |
|          |       |                                              | hHA035279        | PPP1CB         | NM_002709       | 0.83                                             |
|          |       |                                              | hHA036431        | RNF138         | NM_016271       | 0.84                                             |
|          |       |                                              | hCT001211        | HMGCR          | NM_000859       | 0.91                                             |
|          |       |                                              | hCT001499        | RB1            | NM_000321       | 0.81                                             |
|          |       |                                              | hHA033083        | GTF2H1         | NM_001142307    | 0.87                                             |
|          |       |                                              | hHA037511        | NEDD9          | NM_001142393    | 0.82                                             |
|          |       |                                              | hHA034739        | INPP5F         | NM_014937       | 0.84                                             |
|          |       |                                              | hHA037811        | DPYSL2         | NM_001386       | 0.83                                             |
|          |       |                                              | hCT001174        | RB1            | NM_000321       | 0.80                                             |
|          |       |                                              | hCT001162        | HMGCR          | NM_000859       | 0.88                                             |
|          |       |                                              | hCT001270        | HMGCR          | NM_000859       | 0.87                                             |
|          |       |                                              | hHR017590        | SNX12          | NM_013346       | 0.80                                             |
|          |       |                                              | hHR018634        | SRP72          | NM_006947       | 0.85                                             |
|          |       |                                              | hHA033034        | UBE3A          | NM_130839       | 1.00                                             |
|          |       |                                              | hHA033322        | GNAQ           | NM_002072       | 0.81                                             |
|          |       |                                              | hHA037078        | SETD3          | NM_032233       | 0.80                                             |
|          |       |                                              | hHA038794        | G3BP2          | NM_203505       | 0.83                                             |
|          |       |                                              | hCT001198        | RB1            | NM_000321       | 0.83                                             |
|          |       |                                              | hCT001186        | HMGCR          | NM_000859       | 0.91                                             |
|          |       |                                              | hCT001294        | HMGCR          | NM_000859       | 0.93                                             |
|          |       |                                              | hHC020782        | SNX12          | NM_013346       | 0.81                                             |
|          |       |                                              | hCT001210        | HMGCR          | NM_000859       | 0.94                                             |
|          |       |                                              | hCT001318        | HMGCR          | NM_000859       | 0.92                                             |
|          |       |                                              | hHA035578        | ZMYND11        | NM_006624       | 0.83                                             |
|          |       |                                              | hCT001234        | HMGCR          | NM_000859       | 0.85                                             |
|          |       |                                              | hCT001342        | HMGCR          | NM_000859       | 0.80                                             |
|          |       |                                              | hCT001161        | HMGCR          | NM_000859       | 0.94                                             |
|          |       |                                              | hCT001269        | HMGCR          | NM_000859       | 0.95                                             |
|          |       |                                              | hHC004341        | MAP2K6         | U39657          | 0.85                                             |
|          |       |                                              | hHR027573        | ENST0000033211 | ENST00000332119 | 0.81                                             |
|          |       |                                              | hHA035253        | USP14          | NM_005151       | 0.83                                             |
|          |       |                                              | hHA035337        | SPAG9          | NM_001130528    | 0.85                                             |
|          |       |                                              | hHA038613        | WDR17          | NM_170710       | 0.83                                             |
|          |       |                                              | hHA040713        | UHRF2          | NM_152896       | 0.81                                             |
|          |       |                                              | hCT001197        | RB1            | NM_000321       | 0.83                                             |
|          |       |                                              | hCT001293        | HMGCR          | NM_000859       | 0.88                                             |
|          |       |                                              | hCT001281        | OCRL           | NM_000276       | 0.83                                             |
|          |       |                                              | hCT001473        | RB1            | NM_000321       | 0.82                                             |

Table S4 Coexpression

| Gene Set | Probe | Pre-natally enriched Disease-associated Gene | Correlated Probe | Gene       | Accession    | Pearson's Correlation Coefficient (RIN Adjusted) |
|----------|-------|----------------------------------------------|------------------|------------|--------------|--------------------------------------------------|
|          |       |                                              | hHA037869        | USP46      | NM_001134223 | 0.84                                             |
|          |       |                                              | hCT001317        | HMGCR      | NM_000859    | 0.84                                             |
|          |       |                                              | hHC016293        | ZEB2       | NM_014795    | 0.84                                             |
|          |       |                                              | hHA033381        | NCOA4      | NM_005437    | 0.87                                             |
|          |       |                                              | hHA035193        | INPP5F     | NM_014937    | 0.83                                             |
|          |       |                                              | hCT001245        | RB1        | M15400       | 0.81                                             |
|          |       |                                              | hCT001341        | HMGCR      | NM_000859    | 0.90                                             |
|          |       |                                              | hHA035601        | ZMYM6      | NM_007167    | 0.83                                             |
|          |       |                                              | hCT001268        | HMGCR      | NM_000859    | 0.94                                             |
|          |       |                                              | hCT001448        | RB1        | NM_000321    | 0.87                                             |
|          |       |                                              | hHR025556        | API5       | NR_024625    | 0.80                                             |
|          |       |                                              | hHA037652        | SPAG9      | AK024068     | 0.84                                             |
|          |       |                                              | hHE041108        | (CSNK1A1), | CN267058     | 0.84                                             |
|          |       |                                              | hCT001196        | RB1        | NM_000321    | 0.84                                             |
|          |       |                                              | hHA037964        | ATF2       | NM_001880    | 0.84                                             |
|          |       |                                              | hCT001316        | HMGCR      | NM_000859    | 0.92                                             |
|          |       |                                              | hHC015992        | CUL2       | NM_003591    | 0.80                                             |
|          |       |                                              | hCT001340        | HMGCR      | NM_000859    | 0.88                                             |
|          |       |                                              | hCT001520        | RB1        | NM_000321    | 0.85                                             |
|          |       |                                              | hHC002588        | NCOA2      | NM_006540    | 0.81                                             |
|          |       |                                              | hCT001171        | RB1        | NM_000321    | 0.80                                             |
|          |       |                                              | hHC009223        | WDR26      | NM_025160    | 0.84                                             |
|          |       |                                              | hHA034567        | HECTD2     | NM_182765    | 0.85                                             |
|          |       |                                              | hHC005983        | ATXN3      | NM_004993    | 0.85                                             |
|          |       |                                              | hHA039691        | SLC30A5    | NM_022902    | 0.88                                             |
|          |       |                                              | hHC009943        | CACNA2D1   | NM_000722    | 0.83                                             |
|          |       |                                              | hHC010327        | PHF6       | NM_032458    | 0.88                                             |
|          |       |                                              | hHA034363        | YME1L1     | NM_139312    | 0.81                                             |
|          |       |                                              | hHC020934        | CHUK       | NM_001278    | 0.81                                             |
|          |       |                                              | hHA038142        | C9orf72    | NM_018325    | 0.84                                             |
|          |       |                                              | hHR007254        | ZBTB26     | NM_020924    | 0.82                                             |
|          |       |                                              | hHA033942        | MBOAT2     | NM_138799    | 0.83                                             |
|          |       |                                              | hHA035670        | C9orf72    | NM_018325    | 0.84                                             |
|          |       |                                              | hHA033870        | SLC30A5    | NM_022902    | 0.85                                             |
|          |       |                                              | hHA035514        | SNX14      | NM_153816    | 0.83                                             |
|          |       |                                              | hHR014321        | CK818803   | CK818803     | 0.85                                             |
|          |       |                                              | hHC025829        | ZKSCAN1    | NM_003439    | 0.82                                             |
|          |       |                                              | hHC021053        | MAPK8      | NM_139046    | 0.81                                             |
|          |       |                                              | hHC024053        | CSNK1G3    | NM_001044723 | 0.85                                             |
|          |       |                                              | hHC027940        | ZNF770     | NM_014106    | 0.83                                             |
|          |       |                                              | hHA035440        | MBTPS1     | NM_003791    | 0.82                                             |
|          |       |                                              | hHC014703        | 11-Sep     | NM_018243    | 0.86                                             |
|          |       |                                              | hHA034347        | OSBPL6     | NM_032523    | 0.80                                             |
|          |       |                                              | hHA034443        | MTMR2      | NR_023356    | 0.84                                             |

Table S4 Coexpression

| Gene Set | Probe     | Pre-natally enriched Disease-associated Gene | Correlated Probe | Gene     | Accession    | Pearson's Correlation Coefficient (RIN Adjusted) |
|----------|-----------|----------------------------------------------|------------------|----------|--------------|--------------------------------------------------|
|          |           |                                              | hCT001262        | OCRL     | NM_000276    | 0.81                                             |
|          |           |                                              | hHA036770        | PPP2R5C  | NM_002719    | 0.80                                             |
|          |           |                                              | hHA035654        | WDR17    | NM_170710    | 0.85                                             |
|          |           |                                              | hHA039302        | C9orf72  | NM_018325    | 0.84                                             |
|          |           |                                              | hCT001334        | OCRL     | NM_000276    | 0.81                                             |
|          |           |                                              | hHA033002        | MATR3    | NM_199189    | 0.85                                             |
|          |           |                                              | hCT001189        | HMGCR    | NM_000859    | 0.83                                             |
|          |           |                                              | hHC007333        | BM312210 | BM312210     | 0.81                                             |
|          |           |                                              | hHC008377        | GOPC     | NM_020399    | 0.83                                             |
|          |           |                                              | hHA036025        | TCF12    | NM_207037    | 0.82                                             |
|          |           |                                              | hHA037573        | CSE1L    | NM_001316    | 0.82                                             |
|          |           |                                              | hCT001213        | HMGCR    | NM_000859    | 0.83                                             |
|          |           |                                              | hHA035677        | INPP5F   | NM_014937    | 0.88                                             |
|          |           |                                              | hCT001237        | HMGCR    | NM_000859    | 0.80                                             |
|          |           |                                              | hCT001333        | OCRL     | NM_000276    | 0.84                                             |
| ID       | hHR012502 | AP4M1                                        | hHR012502        | AP4M1    | NM_004722    | 1.00                                             |
| ID       | hHC020459 | TCF4                                         | hHC020459        | TCF4     | NM_001083962 | 1.00                                             |
| ID       | hHC013601 | FTSJ1                                        | hHC013601        | FTSJ1    | NM_177439    | 1.00                                             |
| ID       | hCT001285 | OCRL                                         | hHA036996        | KCNH2    | NM_172056    | 0.81                                             |
|          |           |                                              | hHR027299        | CR602880 | CR602880     | 0.87                                             |
|          |           |                                              | hHA039898        | TNXB     | NM_019105    | 0.80                                             |
|          |           |                                              | hHR014709        | RGL3     | AK096811     | 0.81                                             |
|          |           |                                              | hHC011781        | SKAP1    | NM_003726    | 0.84                                             |
|          |           |                                              | hHC016029        | CLC      | NM_001828    | 0.87                                             |
|          |           |                                              | hHA037245        | PPFIBP1  | NM_003622    | 0.82                                             |
|          |           |                                              | hCT001256        | OCRL     | NM_000276    | 0.83                                             |
|          |           |                                              | hHC023252        | ATAD4    | NM_024320    | 0.86                                             |
|          |           |                                              | hHO048776        | EU427377 | EU427377     | 0.82                                             |
|          |           |                                              | hCT000848        | TLN1     | NM_006289    | 0.82                                             |
|          |           |                                              | hHC024691        | TP73     | NM_005427    | 0.81                                             |
|          |           |                                              | hHR027199        | C9orf44  | AK023662     | 0.81                                             |
|          |           |                                              | hHR023046        | TCL6     | NM_014418    | 0.81                                             |
|          |           |                                              | hHC026214        | GFRA3    | NM_001496    | 0.82                                             |
|          |           |                                              | hHR028686        | IFNA6    | NM_021002    | 0.81                                             |
|          |           |                                              | hHA037433        | ABCG1    | AY048757     | 0.81                                             |
|          |           |                                              | hHA032908        | SLC23A2  | NM_005116    | 0.83                                             |
|          |           |                                              | hHR010191        | DMTF1    | NM_021145    | 0.83                                             |
|          |           |                                              | hHR023907        | HMX3     | NM_001105574 | 0.80                                             |
|          |           |                                              | hHA038799        | OTOF     | NM_194248    | 0.82                                             |
|          |           |                                              | hHC025887        | C21orf88 | NR_026542    | 0.80                                             |
|          |           |                                              | hHC020270        | RAB3D    | NM_004283    | 0.85                                             |
|          |           |                                              | hCT000806        | LRP1     | NM_002332    | 0.80                                             |
|          |           |                                              | hHC026785        | LINGO1   | CN295335     | 0.89                                             |
|          |           |                                              | hCT001285        | OCRL     | NM_000276    | 1.00                                             |



Table S4 Coexpression

| Gene Set | Probe     | Pre-natally enriched Disease-associated Gene | Correlated Probe | Gene         | Accession    | Pearson's Correlation Coefficient (RIN Adjusted) |
|----------|-----------|----------------------------------------------|------------------|--------------|--------------|--------------------------------------------------|
| ID       | hHC009198 | SLC16A2                                      | hHC009198        | SLC16A2      | NM_006517    | 1.00                                             |
| ID       | hHC027610 | OFD1                                         | hHC027610        | OFD1         | NM_003611    | 1.00                                             |
| ID       | hHA034468 | DLG3                                         | hHA034468        | DLG3         | NM_020730    | 1.00                                             |
| ID       | hHC002925 | OPHN1                                        | hHC002925        | OPHN1        | NM_002547    | 1.00                                             |
| ID       | hHC016668 | FLNA                                         | hHC016668        | FLNA         | NM_001110556 | 1.00                                             |
| ID       | hHA037813 | ERLIN2                                       | hHA037813        | ERLIN2       | NM_007175    | 1.00                                             |
| NDG      | hCT001336 | APP                                          | hHA034332        | MBNL1        | NM_021038    | 0.81                                             |
|          |           |                                              | hHA035375        | LANCL1       | NM_006055    | 0.84                                             |
|          |           |                                              | hHR027419        | HSPA9        | NM_004134    | 0.85                                             |
|          |           |                                              | hHA034151        | TM7SF3       | NM_016551    | 0.82                                             |
|          |           |                                              | hHC006515        | PHC3         | NM_024947    | 0.83                                             |
|          |           |                                              | hHA033395        | CCT6A        | NM_001762    | 0.80                                             |
|          |           |                                              | hHC008805        | BMI1         | NM_005180    | 0.80                                             |
|          |           |                                              | hHR025556        | API5         | NR_024625    | 0.84                                             |
|          |           |                                              | hHA037136        | HDHD2        | NM_032124    | 0.83                                             |
|          |           |                                              | hCT001183        | APP          | NM_000484    | 0.86                                             |
|          |           |                                              | hCT001231        | APP          | NM_000484    | 0.82                                             |
|          |           |                                              | hCT001158        | APP          | NM_000484    | 0.84                                             |
|          |           |                                              | hHC008454        | CASP3        | NM_004346    | 0.85                                             |
|          |           |                                              | hHA033126        | CASC4        | NM_138423    | 0.81                                             |
|          |           |                                              | hHA036978        | TMEM66       | NM_016127    | 0.88                                             |
|          |           |                                              | hCT001182        | APP          | NM_000484    | 0.87                                             |
|          |           |                                              | hCT001206        | APP          | NM_000484    | 0.87                                             |
|          |           |                                              | hCT001230        | APP          | NM_000484    | 0.91                                             |
|          |           |                                              | hHC028698        | CSNK1A1      | NM_001025105 | 0.81                                             |
|          |           |                                              | hHA033306        | GOT2         | NM_002080    | 0.83                                             |
|          |           |                                              | hHC013157        | SEL1L        | NM_005065    | 0.80                                             |
|          |           |                                              | hCT001289        | APP          | NM_000484    | 0.85                                             |
|          |           |                                              | hHR023273        | TOMM20       | NM_014765    | 0.85                                             |
|          |           |                                              | hHC028925        | NAP1L4       | NM_005969    | 0.83                                             |
|          |           |                                              | hHC031625        | LOC100131998 | AK055742     | 0.82                                             |
|          |           |                                              | hHA034781        | UQCC         | NM_018244    | 0.81                                             |
|          |           |                                              | hCT001313        | APP          | NM_000484    | 0.84                                             |
|          |           |                                              | hHA034241        | PTPN12       | NM_002835    | 0.85                                             |
|          |           |                                              | hCT001337        | APP          | NM_000484    | 0.90                                             |
|          |           |                                              | hCT001264        | APP          | NM_000484    | 0.84                                             |
|          |           |                                              | hCT001288        | APP          | NM_000484    | 0.90                                             |
|          |           |                                              | hCT001312        | APP          | NM_000484    | 0.92                                             |
|          |           |                                              | hHC031215        | ATP6AP2      | NM_005765    | 0.81                                             |
|          |           |                                              | hHA033231        | TCP1         | NM_030752    | 0.82                                             |
|          |           |                                              | hHA040743        | SLC30A5      | NM_022902    | 0.81                                             |
|          |           |                                              | hHA034443        | MTMR2        | NR_023356    | 0.82                                             |
|          |           |                                              | hHR012818        | RFWD2        | NM_022457    | 0.80                                             |
|          |           |                                              | hHR026558        | BZW1         | NM_014670    | 0.81                                             |

Table S4 Coexpression

| Gene Set | Probe     | Pre-natally enriched Disease-associated Gene | Correlated Probe | Gene      | Accession    | Pearson's Correlation Coefficient (RIN Adjusted) |
|----------|-----------|----------------------------------------------|------------------|-----------|--------------|--------------------------------------------------|
| NDG      | hHA034733 | C9orf72                                      | hHA034733        | C9orf72   | NM_018325    | 1.00                                             |
| NDG      | hHC007088 | CD2AP                                        | hHC007088        | CD2AP     | NM_012120    | 1.00                                             |
| NDG      | hHC024724 | FUS                                          | hHC024724        | FUS       | NM_004960    | 1.00                                             |
| NDG      | hHR012346 | MAPT                                         | hHC013920        | FASN      | NM_004104    | 0.83                                             |
|          |           |                                              | hHA037044        | SPTBN1    | NM_003128    | 0.80                                             |
|          |           |                                              | hHC010607        | ANKH      | NM_054027    | 0.85                                             |
|          |           |                                              | hHC011075        | NRXN1     | NM_001135659 | 0.83                                             |
|          |           |                                              | hHC017927        | PDIA2     | NM_006849    | 0.85                                             |
|          |           |                                              | hHR001582        | GNAZ      | NM_002073    | 0.84                                             |
|          |           |                                              | hHC007234        | PRKCE     | NM_005400    | 0.81                                             |
|          |           |                                              | hHC017710        | RAB11FIP4 | NM_032932    | 0.90                                             |
|          |           |                                              | hHR012346        | MAPT      | NM_001123066 | 1.00                                             |
|          |           |                                              | hHC013318        | GNAZ      | NM_002073    | 0.83                                             |
|          |           |                                              | hHR015934        | DOK4      | NM_018110    | 0.83                                             |
|          |           |                                              | hHC008119        | ADCY1     | NM_021116    | 0.88                                             |
|          |           |                                              | hHC008431        | CLIP2     | NM_003388    | 0.80                                             |
|          |           |                                              | hHA034861        | ARPP-21   | NM_016300    | 0.81                                             |

Supp Table 5 ASD-CNV Loci.pdf

## CNV LOCI ASSOCIATED WITH SCZ AND ASD

| Band   |         | Gene    | Fetal Effect | t statistic | p-value  |
|--------|---------|---------|--------------|-------------|----------|
| 1q21.1 | Dup/Del | NBPF13P | n/a          |             |          |
|        |         | PRKAB2  | 1.39         | 21.24       | 8.97E-57 |
|        |         | FMO5    |              |             |          |
|        |         | CHD1L   | n/a          |             |          |
|        |         | BCL9    | 2.02         | 23.33       | 2.50E-63 |
|        |         | ACP6    | n/a          |             |          |
|        |         | GJA5    | 0.25         | 3.02        | 2.82E-03 |
|        |         | GJA8    | -0.49        | -6.30       | 1.40E-09 |
|        |         | GPR89B  | n/a          |             |          |
|        |         | GPR89C  | n/a          |             |          |
|        |         | PDZK1P1 | n/a          |             |          |
|        |         | NBPF8   | n/a          |             |          |
|        |         | NBPF24  | n/a          |             |          |
|        |         | NBPF11  | n/a          |             |          |
|        |         | NBPF10  | n/a          |             |          |
| 2p16.3 | Dup/Del | NRXN1   | 1.31         | 14.33       | 6.02E-34 |

| Band    |         | Gene   | Fetal Effect | t statistic | p-value  |
|---------|---------|--------|--------------|-------------|----------|
| 15q13.3 | Del/Dup | MTMR15 | 0.50         | 7.52        | 1.10E-12 |
|         |         | MTMR10 | n/a          |             |          |
|         |         | TRPM1  | n/a          |             |          |
|         |         | MIR211 | n/a          |             |          |
|         |         | KLF13  | -0.53        | -6.24       | 2.04E-09 |
|         |         | OTUD7A | -0.96        | -10.35      | 6.01E-21 |
|         |         | CHRNA7 | 0.83         | 5.64        | 4.76E-08 |

| Band    |         | Gene             | Fetal Effect | t statistic | p-value  |
|---------|---------|------------------|--------------|-------------|----------|
| 16p11.2 | Del/Dup | SPN              | 0.15         | 3.40        | 7.88E-04 |
|         |         | QPRT             | -0.86        | -10.74      | 3.41E-22 |
|         |         | C16orf54         | -0.01        | -0.11       | 9.09E-01 |
|         |         | ZG16             | n/a          |             |          |
|         |         | KIF22            | 0.22         | 3.55        | 4.67E-04 |
|         |         | MAZ              | -0.06        | -1.78       | 7.63E-02 |
|         |         | PRRT2            | -0.57        | -7.73       | 3.02E-13 |
|         |         | PAGRI (C16orf53) | 1.29         | 19.62       | 1.49E-51 |
|         |         | MVP              | -1.16        | -12.58      | 3.84E-28 |
|         |         | CDIPT            | -0.59        | -13.67      | 9.04E-32 |
|         |         | SEZ6L2           | -1.44        | -16.87      | 1.83E-42 |
|         |         | ASPHD1           | 0.74         | 8.54        | 1.69E-15 |
|         |         | KCTD13           | 0.16         | 2.41        | 1.68E-02 |
|         |         | TMEM219          | -0.95        | -18.45      | 1.04E-47 |
|         |         | TAOK2            | 0.50         | 5.08        | 7.67E-07 |
|         |         | HIRIP3           | 0.16         | 2.28        | 2.33E-02 |
|         |         | INO80E           | -0.03        | -0.68       | 4.98E-01 |
|         |         | DOC2A            | -0.64        | -13.19      | 3.67E-30 |
|         |         | C16orf92         | n/a          |             |          |
|         |         | FAM57B           | -0.64        | -13.19      | 3.67E-30 |
|         |         | ALDOA            | 0.32         | 5.01        | 1.08E-06 |
|         |         | PPP4C            | 1.29         | 18.99       | 1.69E-49 |
|         |         | TBX6             | -0.78        | -9.56       | 1.59E-18 |
|         |         | YPEL3            | -0.95        | -16.01      | 1.35E-39 |
|         |         | GDPD3            | 0.24         | 4.35        | 2.03E-05 |
| MAPK3   | -1.22   | -20.77           | 2.91E-55     |             |          |

| Band     |         | Gene     | Fetal Effect | t statistic | p-value  |
|----------|---------|----------|--------------|-------------|----------|
| 22q11.21 | Del/Dup | DGCR6    | -0.73        | -13.54      | 2.53E-31 |
|          |         | PRODH    | -1.01        | -9.02       | 6.36E-17 |
|          |         | DGCR5    | 0.65         | 7.67        | 4.41E-13 |
|          |         | DGCR9    | -0.60        | -6.57       | 3.13E-10 |
|          |         | DGCR10   | 0.56         | 4.23        | 3.37E-05 |
|          |         | DGCR2    | -0.73        | -12.66      | 2.09E-28 |
|          |         | DGCR11   | 0.00         | 0.03        | 9.72E-01 |
|          |         | DGCR14   | 0.45         | 5.40        | 1.60E-07 |
|          |         | TSSK2    | -0.55        | -5.51       | 9.14E-08 |
|          |         | GSC2     | n/a          |             |          |
|          |         | SLC25A1  | 0.48         | 8.50        | 2.19E-15 |
|          |         | CLTCL1   | 0.48         | 8.50        | 2.19E-15 |
|          |         | HIRA     | 0.58         | 11.24       | 9.08E-24 |
|          |         | MRPL40   | -0.50        | -7.82       | 1.74E-13 |
|          |         | C22orf39 | n/a          |             |          |
|          |         | UFD1L    | 0.25         | 5.15        | 5.60E-07 |
|          |         | CDCAF1   | 3.89         | 25.04       | 1.59E-68 |
|          |         | CLDN5    | n/a          |             |          |
|          |         | SEPT5    | n/a          |             |          |
|          |         | GP1BB    | n/a          |             |          |

## OTHER CNV LOCI ASSOCIATED WITH SCZ

| Locus  | CNV Type | Genes    | Fetal Effect | t statistic | p-value  |
|--------|----------|----------|--------------|-------------|----------|
| 1q21.1 | Del      | HF2E     | 0.09         | 0.70        | 4.82E-01 |
|        |          | TXNIP    | 0.86         | 6.21        | 2.33E-09 |
|        |          | POLR3GL  | 0.05         | 1.04        | 2.97E-01 |
|        |          | ANKRD34A | -0.98        | -14.04      | 5.24E-33 |
|        |          | LIX1L    | 1.38         | 21.92       | 6.15E-59 |
|        |          | RBM8A    | 0.90         | 15.33       | 2.48E-37 |
|        |          | GNRH2    | -0.49        | -5.22       | 3.85E-07 |
|        |          | PEX11B   | -0.70        | -15.11      | 1.44E-36 |
|        |          | ITGA10   | n/a          |             |          |
|        |          | ANKRD35  | -0.61        | -8.15       | 2.04E-14 |
|        |          | PIAS3    | 0.07         | 1.46        | 1.46E-01 |
|        |          | NUDT17   | -0.30        | -5.72       | 3.23E-08 |
|        |          | POLR3C   | 0.19         | 4.05        | 6.81E-05 |
|        |          | RNF115   | 0.08         | 1.27        | 2.06E-01 |
|        |          | CD160    | -0.49        | -8.59       | 1.18E-15 |
|        |          | PDZK1    | 0.23         | 2.12        | 3.52E-02 |
|        |          | GPR89A   | n/a          |             |          |

| Locus | CNV Type | Genes    | Fetal Effect | t statistic | p-value  |
|-------|----------|----------|--------------|-------------|----------|
| 3q29  | Del      | TFRC     | -0.42        | -3.88       | 1.33E-04 |
|       |          | ZDHHC19  | -0.16        | -3.59       | 4.09E-04 |
|       |          | OSTalpha | -0.01        | -0.07       | 9.47E-01 |
|       |          | PCYT1A   | -0.45        | -7.23       | 6.50E-12 |
|       |          | TCTEX1D2 | 0.62         | 8.82        | 2.46E-16 |
|       |          | TM4SF19  | -0.04        | -0.58       | 5.60E-01 |
|       |          | UBXD7    | 1.05         | 15.84       | 4.86E-39 |
|       |          | RNF168   | -0.13        | -1.09       | 2.78E-01 |
|       |          | SMCO1    | n/a          |             |          |
|       |          | WDR53    | -0.40        | -4.15       | 4.71E-05 |
|       |          | FBXO45   | 0.05         | 1.09        | 2.77E-01 |
|       |          | NRROS    | n/a          |             |          |
|       |          | CEP19    | n/a          |             |          |
|       |          | PIGX     | -0.40        | -4.72       | 4.00E-06 |
|       |          | PAK2     | 1.74         | 24.02       | 1.95E-65 |
|       |          | SENP5    | -0.39        | -5.55       | 7.65E-08 |
|       |          | NCBP2    | 1.11         | 21.09       | 2.57E-56 |
|       |          | PIGZ     | -1.19        | -15.29      | 3.41E-37 |
|       |          | MFIZ     | 0.07         | 0.92        | 3.59E-01 |
|       |          | DLG1     | 0.20         | 4.14        | 4.92E-05 |

| Locus  | CNV Type | Genes | Fetal Effect | t statistic | p-value |
|--------|----------|-------|--------------|-------------|---------|
| 7q36.3 | Dup      | VIPR2 | n/a          |             |         |

| Locus   | CNV Type | Genes   | Fetal Effect | t statistic | p-value  |
|---------|----------|---------|--------------|-------------|----------|
| 15q11.2 | Del      | CYFIP1  | 0.55         | 4.89        | 1.87E-06 |
|         |          | NIPA2   | -0.03        | -0.73       | 4.66E-01 |
|         |          | NIPA1   | -1.18        | -13.19      | 3.66E-30 |
|         |          | TUBGCP5 | n/a          |             |          |

| Locus   | CNV Type | Genes     | Fetal Effect | t statistic | p-value  |
|---------|----------|-----------|--------------|-------------|----------|
| 15q13.3 | Del/Dup  | CHRFAM7A  | -1.54        | -13.74      | 5.29E-32 |
|         |          | ARHGAP11B | n/a          |             |          |
|         |          | MTMR15    | 0.50         | 7.52        | 1.10E-12 |
|         |          | MTMR10    | n/a          |             |          |
|         |          | TRPM1     | n/a          |             |          |
|         |          | MIR211    | n/a          |             |          |
|         |          | KLF13     | -0.53        | -6.24       | 2.04E-09 |
|         |          | OTUD7A    | -0.96        | -10.35      | 6.01E-21 |
|         |          | CHRNA7    | 0.83         | 5.64        | 4.76E-08 |

| Locus   | CNV Type | Genes            | Fetal Effect | t statistic | p-value  |
|---------|----------|------------------|--------------|-------------|----------|
| 16p11.2 | Dup      | SPN              | 0.15         | 3.40        | 7.88E-04 |
|         |          | QPRT             | -0.86        | -10.74      | 3.41E-22 |
|         |          | C16orf54         | -0.01        | -0.11       | 9.09E-01 |
|         |          | ZG16             | n/a          |             |          |
|         |          | KIF22            | 0.22         | 3.55        | 4.67E-04 |
|         |          | MAZ              | -0.06        | -1.78       | 7.63E-02 |
|         |          | PRRT2            | -0.57        | -7.73       | 3.02E-13 |
|         |          | PAGRI (C16orf53) | 1.29         | 19.62       | 1.49E-51 |
|         |          | MVP              | -1.16        | -12.58      | 3.84E-28 |
|         |          | CDIPT            | -0.59        | -13.67      | 9.04E-32 |
|         |          | SEZ6L2           | -1.44        | -16.87      | 1.83E-42 |
|         |          | ASPHD1           | 0.74         | 8.54        | 1.69E-15 |
|         |          | KCTD13           | 0.16         | 2.41        | 1.68E-02 |
|         |          | TMEM219          | -0.95        | -18.45      | 1.04E-47 |
|         |          | TAOK2            | 0.50         | 5.08        | 7.67E-07 |
|         |          | HIRIP3           | 0.16         | 2.28        | 2.33E-02 |
|         |          | INO80E           | -0.03        | -0.68       | 4.98E-01 |
|         |          | DOC2A            | -0.64        | -13.19      | 3.67E-30 |
|         |          | C16orf92         | n/a          |             |          |

## OTHER CNV LOCI ASSOCIATED WITH ASD

| Band   |      | Gene    | Fetal Effect | t statistic | p-value  |
|--------|------|---------|--------------|-------------|----------|
| 3p14.1 | Del  | MAG1    | 0.12         | 1.76        | 7.93E-02 |
| 3p14.1 | Del  | SUCLG2  | -0.60        | -8.90       | 1.49E-16 |
|        |      | FAM19A1 | n/a          |             |          |
|        |      | FAM19A4 | n/a          |             |          |
|        |      | C3orf64 |              |             |          |
|        |      | MIR3136 | n/a          |             |          |
|        |      | TMF1    | 0.24         | 1.64        | 1.03E-01 |
|        |      | UBA3    | 1.38         | 21.13       | 2.01E-56 |
|        |      | ARL6IP5 | -1.02        | -16.17      | 4.03E-40 |
|        |      | LMOD3   | -0.35        | -2.75       | 6.50E-03 |
|        |      | FRMD4B  | 1.78         | 14.47       | 1.97E-34 |
| MITF   | 0.17 | 2.09    | 3.79E-02     |             |          |

| Band   |     | Gene   | Fetal Effect | t statistic | p-value  |
|--------|-----|--------|--------------|-------------|----------|
| 5p15.2 | Del | CTNND2 | -0.07        | -0.96       | 3.37E-01 |

| Band     |      | Gene    | Fetal Effect | t statistic | p-value  |
|----------|------|---------|--------------|-------------|----------|
| 7q11.23  | Dup  | FZ09    | -0.41        | -4.23       | 3.34E-05 |
|          |      | BAZ1B   | 0.15         | 2.61        | 9.52E-03 |
|          |      | BCL7B   | 0.21         | 3.15        | 1.84E-03 |
|          |      | TBL2    | 0.17         | 2.61        | 9.66E-03 |
|          |      | MLXPL   | n/a          |             |          |
|          |      | VPS37D  | 0.81         | 11.86       | 8.78E-26 |
|          |      | DNAJC30 | 0.20         | 3.51        | 5.41E-04 |
|          |      | WSCR22  | -0.37        | -8.11       | 2.77E-14 |
|          |      | STX1A   | -1.52        | -18.84      | 5.20E-49 |
|          |      | MIR4284 | n/a          |             |          |
|          |      | ABHD11  | 0.04         | 0.47        | 6.41E-01 |
|          |      | CLDN3   | -0.27        | -4.75       | 3.53E-06 |
|          |      | CLDN4   | 0.02         | 0.14        | 8.86E-01 |
|          |      | WSCR27  | -0.29        | -2.22       | 2.74E-02 |
|          |      | WSCR28  | 0.19         | 2.53        | 1.21E-02 |
|          |      | ELN     | -0.03        | -0.36       | 7.20E-01 |
|          |      | LIMK1   | -0.50        | -6.61       | 2.58E-10 |
|          |      | MIR590  | n/a          |             |          |
|          |      | LAT2    | -1.22        | -8.35       | 5.75E-15 |
|          |      | RFC2    | 0.83         | 15.90       | 3.10E-39 |
| CLIP2    | 0.18 | 2.69    | 7.63E-03     |             |          |
| GTF2IRD1 | 1.68 | 25.04   | 1.64E-68     |             |          |
| GTF2I    | n/a  |         |              |             |          |

| Band   |         | Gene    | Fetal Effect | t statistic | p-value |
|--------|---------|---------|--------------|-------------|---------|
| 7q31.1 | Del/Dup | C7orf66 | n/a          |             |         |

| Band   |         | Gene  | Fetal Effect | t statistic | p-value  |
|--------|---------|-------|--------------|-------------|----------|
| 7q31.1 | Del/Dup | DOCK4 | 0.12         | 1.39        | 1.67E-01 |

| Band   |     | Gene | Fetal Effect | t statistic | p-value |
|--------|-----|------|--------------|-------------|---------|
| 7q36.2 | Del | DPP6 | n/a          |             |         |

| Band   |     | Gene   | Fetal Effect | t statistic | p-value  |
|--------|-----|--------|--------------|-------------|----------|
| 8p23.3 | Dup | DLGAP2 | -2.22        | -24.35      | 1.96E-66 |

| Band   |         | Gene    | Fetal Effect | t statistic | p-value  |
|--------|---------|---------|--------------|-------------|----------|
| 9p24.3 | Del/Dup | FOXO4   | n/a          |             |          |
|        |         | CBWD1   | 0.52         | 7.79        | 2.04E-13 |
|        |         | C9orf66 | -0.38        | -5.36       | 2.01E-07 |
|        |         | DOCK8   | -1.52        | -9.42       | 4.19E-18 |

| Band          |     | Gene   | Fetal Effect | t statistic | p-value  |
|---------------|-----|--------|--------------|-------------|----------|
| 10q11.23-21.1 | Dup | PRKG1  | n/a          |             |          |
|               |     | MIR605 | n/a          |             |          |
|               |     | CSTF2T | 0.39         | 4.97        | 1.29E-06 |
|               |     | DKK1   | 0.01         | 0.11        | 9.12E-01 |
|               |     | MBL2   | 0.23         | 2.28        | 2.37E-02 |

| Band     |     | Gene     | Fetal Effect | t statistic | p-value  |
|----------|-----|----------|--------------|-------------|----------|
| 12q24.31 | Dup | TMEM120B | n/a          |             |          |
|          |     | RHF0     | -1.58        | -23.39      | 1.67E-63 |
|          |     | SETD1B   | 1.30         | 21.60       | 6.47E-58 |
|          |     | HPD      | -0.12        | -1.69       | 9.20E-02 |
|          |     | PSMD9    | 0.18         | 2.56        | 1.09E-02 |
|          |     | WDR66    | -0.58        | -6.48       | 5.32E-10 |

| Band         |     | Gene    | Fetal Effect | t statistic | p-value  |
|--------------|-----|---------|--------------|-------------|----------|
| 15q11.2-13.1 | Dup | MKRN3   | 1.26         | 9.75        | 4.09E-19 |
|              |     | MAGEL2  | -0.45        | -5.28       | 2.92E-07 |
|              |     | NDN     | -0.01        | -0.10       | 9.18E-01 |
|              |     | PWRN2   | n/a          |             |          |
|              |     | PWRN1   | n/a          |             |          |
|              |     | C15orf2 | -1.90        | -19.39      | 7.92E-51 |
|              |     | SNURF   | -1.69        | -25.02      | 1.84E-68 |
|              |     | SNRPN   | 0.09         | 0.80        | 4.23E-01 |

CNV LOCI ASSOCIATED WITH SCZ AND ASD

|  |          |       |        |          |
|--|----------|-------|--------|----------|
|  | TBK1     | -0.70 | -11.59 | 6.57E-25 |
|  | GNB1L    | -0.25 | -3.92  | 1.14E-04 |
|  | C22orf29 | 0.07  | 1.38   | 1.70E-01 |
|  | TXNRD2   | -0.84 | -16.35 | 9.34E-41 |
|  | COMT     | -0.28 | -5.30  | 2.66E-07 |
|  | ARVCF    | 0.57  | 10.39  | 4.53E-21 |
|  | C22orf25 | -1.47 | -23.16 | 8.40E-63 |
|  | MIR185   | n/a   |        |          |
|  | DGCR8    | 0.82  | 6.25   | 1.92E-09 |
|  | MIR3618  | n/a   |        |          |
|  | MIR1306  | n/a   |        |          |
|  | TRMT2A   | -0.40 | -5.92  | 1.14E-08 |
|  | RANBP1   | 0.40  | 8.73   | 4.51E-16 |
|  | ZDHC8    | -0.16 | -3.59  | 4.09E-04 |
|  | RTN4R    | -0.81 | -9.38  | 5.47E-18 |
|  | MIR1286  | n/a   |        |          |
|  | DGCR6L   | -0.74 | -13.76 | 4.76E-32 |
|  | TMEM191B | n/a   |        |          |
|  | RIMBP3   | n/a   |        |          |
|  | ZNF74    | 1.57  | 23.04  | 2.05E-62 |
|  | SCARF2   | -0.17 | -3.01  | 2.92E-03 |
|  | KLHL22   | 0.38  | 8.72   | 5.11E-16 |
|  | MED15    | -0.49 | -10.55 | 1.36E-21 |
|  | PI4KA    | 0.50  | 5.74   | 2.81E-08 |
|  | SERPIND1 | 0.74  | 6.22   | 2.23E-09 |
|  | SNAP29   | -0.69 | -9.68  | 6.90E-19 |
|  | CRKL     | 0.05  | 0.94   | 3.49E-01 |
|  | AIFM3    | n/a   |        |          |
|  | LZTR1    | 0.56  | 10.82  | 1.98E-22 |
|  | THAP7    | -0.13 | -3.41  | 7.74E-04 |
|  | P2RX6    | 0.16  | 3.13   | 2.00E-03 |
|  | SLC7A4   | -0.83 | -12.06 | 1.97E-26 |
|  | RIMBP3C  | n/a   |        |          |
|  | RIMBP3B  | n/a   |        |          |
|  | HIC2     | 2.32  | 31.79  | 1.95E-87 |

OTHER CNV LOCI ASSOCIATED WITH SCZ

|  |         |       |        |          |
|--|---------|-------|--------|----------|
|  | FAM57B  | -0.64 | -13.19 | 3.67E-30 |
|  | ALDOA   | 0.32  | 5.01   | 1.08E-06 |
|  | PPP4C   | 1.29  | 18.99  | 1.69E-49 |
|  | TBX6    | -0.78 | -9.56  | 1.59E-18 |
|  | YPEL3   | -0.95 | -16.01 | 1.35E-39 |
|  | GDPD3   | 0.24  | 4.35   | 2.03E-05 |
|  | MAPK3   | -1.22 | -20.77 | 2.91E-55 |
|  | CORO1A  | -0.97 | -16.13 | 5.34E-40 |
|  | BOLA2B  | n/a   |        |          |
|  | BOLA2   | n/a   |        |          |
|  | SLX1A   | n/a   |        |          |
|  | SLX1B   | n/a   |        |          |
|  | SULT1A4 | n/a   |        |          |
|  | SULT1A3 | n/a   |        |          |

OTHER CNV LOCI ASSOCIATED WITH ASD

|  |         |       |        |          |
|--|---------|-------|--------|----------|
|  | PWARSN  | 0.67  | 6.57   | 3.21E-10 |
|  | PWARS   | 0.69  | 5.76   | 2.60E-08 |
|  | IPW     | -0.06 | -0.64  | 5.21E-01 |
|  | PWAR1   | -0.39 | -3.59  | 4.03E-04 |
|  | PWAR4   | 0.05  | 0.81   | 4.20E-01 |
|  | UBE3A   | 0.71  | 6.01   | 7.11E-09 |
|  | ATP10A  | -1.50 | -10.73 | 3.76E-22 |
|  | MIR4715 | n/a   |        |          |
|  | GABRB3  | 0.21  | 2.36   | 1.90E-02 |
|  | GABRA5  | -2.43 | -27.43 | 1.71E-75 |
|  | GABRG3  | -0.44 | -4.38  | 1.81E-05 |
|  | OCA2    | -0.54 | -4.48  | 1.17E-05 |
|  | HERC2   | -0.40 | -5.52  | 8.70E-08 |

|            |     |          |       |        |          |
|------------|-----|----------|-------|--------|----------|
| 15q23-24.1 | Del | THSD4    | n/a   |        |          |
|            |     | NR2E3    | 0.04  | 0.32   | 7.47E-01 |
|            |     | MYO9A    | 0.82  | 9.84   | 2.25E-19 |
|            |     | SENP8    | n/a   |        |          |
|            |     | GRAMD2   | -1.04 | -9.05  | 5.38E-17 |
|            |     | PKM      | 0.05  | 0.61   | 5.41E-01 |
|            |     | PARP6    | 0.69  | 12.73  | 1.21E-28 |
|            |     | CELF6    | -0.05 | -0.76  | 4.49E-01 |
|            |     | HEXA     | n/a   |        |          |
|            |     | HEXA-AS1 | n/a   |        |          |
|            |     | TMEM202  | n/a   |        |          |
|            |     | ARIH1    | 0.42  | 9.17   | 2.29E-17 |
|            |     | MIR630   | n/a   |        |          |
|            |     | GOLGA6B  | n/a   |        |          |
|            |     | HIGD2BP  | -0.31 | -5.05  | 9.00E-07 |
|            |     | BB54     | 0.02  | 0.21   | 8.32E-01 |
|            |     | ADPGK    | -0.36 | -6.44  | 6.77E-10 |
|            |     | NEO1     | 1.35  | 15.02  | 2.86E-36 |
|            |     | HCN4     | 0.39  | 8.56   | 1.40E-15 |
|            |     | C15orf60 | n/a   |        |          |
|            |     | NPTN     | -1.30 | -23.00 | 2.56E-62 |
|            |     | CD276    | -1.30 | -23.00 | 2.56E-62 |
|            |     | C15orf59 | -0.01 | -0.11  | 9.09E-01 |

|         |     |         |       |        |          |
|---------|-----|---------|-------|--------|----------|
| 16q23.3 | Del | OSGIN1  | 0.10  | 1.90   | 5.83E-02 |
|         |     | NECAB2  | -2.30 | -17.89 | 7.29E-46 |
|         |     | SLC38A8 | -0.45 | -2.82  | 5.17E-03 |
|         |     | MBTPS1  | 0.59  | 10.10  | 3.47E-20 |

|         |     |          |       |       |             |
|---------|-----|----------|-------|-------|-------------|
| 18q22.1 | Del | CCDC102B | -0.42 | -2.23 | 0.026808138 |
|---------|-----|----------|-------|-------|-------------|

|          |         |                 |       |        |             |
|----------|---------|-----------------|-------|--------|-------------|
| 20q13.33 | Del/Dup | TCFL5           | -1.11 | -12.39 | 1.62E-27    |
|          |         | DIDO1           | 1.04  | 8.76   | 3.80E-16    |
|          |         | GID8 (C20orf11) | 1.01  | 15.76  | 9.57E-39    |
|          |         | SLC17A9         | -1.65 | -10.49 | 2.08E-21    |
|          |         | BHLHE23         | -0.16 | -3.59  | 0.000408524 |
|          |         | HAR1B           | n/a   |        |             |
|          |         | HAR1A           | n/a   |        |             |

|          |     |          |       |        |             |
|----------|-----|----------|-------|--------|-------------|
| 22q13.33 | Del | SBF1     | -0.41 | -6.04  | 5.82E-09    |
|          |     | ADM2     | 0.43  | 9.65   | 8.34E-19    |
|          |     | MIOX     | -0.52 | -9.44  | 3.55E-18    |
|          |     | LMF2     | -0.08 | -1.97  | 0.050122583 |
|          |     | NCAPH2   | 0.82  | 9.84   | 2.25E-19    |
|          |     | SCO2     | -0.57 | -9.18  | 2.20E-17    |
|          |     | TYMP     | -0.59 | -4.52  | 9.87E-06    |
|          |     | ODF3B    | -0.29 | -5.44  | 1.30E-07    |
|          |     | KLHDC7B  | -0.02 | -0.32  | 0.749222246 |
|          |     | SYCE3    | n/a   |        |             |
|          |     | CPT1B    | 0.76  | 11.87  | 8.01E-26    |
|          |     | CHKB     | 0.60  | 9.55   | 1.66E-18    |
|          |     | MAPK8IP2 | -1.04 | -19.21 | 3.20E-50    |
|          |     | ARSA     | n/a   |        |             |
|          |     | SHANK3   | 0.69  | 7.85   | 1.42E-13    |

Note: Genes with a fetal effect greater than 0.5 are highlighted in red and genes with a fetal effect greater than 1 are shaded
